# Supplementary material for: Functional and Computational Analysis of Amino Acid Patterns Predictive of Type III Secretion System Substrates in Pseudomonas syringae
Source: PLoS One. 2012 Apr 27;7(4):e36038. doi: 10.1371/journal.pone.0036038 (PMC3338616; doi:10.1371/journal.pone.0036038)
Supplement: Table S2 — TEREE algorithm scores for proteins in T3SS substrate and negative training sets. (XLSX) [file pone.0036038.s002.xlsx]

## Sheet: Sheet1
RANK	Presence in T3SS substrate (+) or negative (-) training set	Protein	TEREE Score
1	+	lcl|HopO1-1|(effector)	-47
2	+	lcl|AvrPtoB(HopAB2)|(effector)	-43
3	+	lcl|HopAF1|(effector)	-43
4	+	lcl|HopAO1|(effector) 63% identical to HopD1 in first 194 aas	-40
5	+	lcl|HopF2|(effector)	-39
6	+	lcl|HopD1|(effector)	-39
7	+	1cl|HopT1-1|(effector)	-38
8	+	lcl|HopP1| (helper) 36% identical to hrpW1 in first 128 aas	-37
9	+	lcl|HopAA1-1|(effector)	-37
10	+	lcl|HopAA1-2|(effector) 79% identical to HopAA1-1 over entire protein	-37
11	+	1cl|HopT1-2|(effector) 72% identical to HopT1-1 over entire protein	-37
12	+	1cl|HopAH1|(effector)	-37
13	+	lcl|HopC1|(effector)	-35
14	+	lcl|HopO1-2|(effector)	-35
15	+	lcl|HopX1|(effector)	-34
16	+	lcl|AvrPto1|(effector)	-34
17	+	lcl|HopAM1-1|(effector)	-33
18	+	lcl|HopK1|(effector)	-33
19	+	lcl|HopB1|(effector)	-33
20	+	lcl|HopM1|(effector)	-33
21	+	1cl|HopQ1-1|(effector)	-33
22	+	lcl|HrpW1| (helper)	-30
23	+	lcl|HrpZ1| (helper)	-29
24	+	lcl|HopAK1| (helper)	-28
25	+	lcl|HopN1|(effector)	-28
26	+	lcl|HrpJ1|(helper)	-27
27	+	lcl|AvrE1|(effector)	-27
28	+	lcl|HopAD1|(effector)	-26
29	+	lcl|HopE1|(effector)	-26
30	+	lcl|HopH1|(effector)	-24
31	+	1cl|HopI1|(effector)	-24
32	+	1cl|HopR1|(effector)	-23
33	+	1cl|HopY1|(effector)	-23
34	+	1cl|HopV1|(effector)	-21
35	+	lcl|HopG1|(effector)	-19
36	+	lcl|HopU1|(effector)	-18
37	+	lcl|HrpA1| (helper)	-17
38	+	lcl|HrpH|(helper)	-16
39	+	1cl|HopS2|(effector)	-15
40	+	lcl|HopA1|(effector)	-12
41	-	noneffector FlgE flagellar hook 1249808:1251127 reverse MW:45685	-11
42	+	1cl|HopAI1|(effector)	-10
43	+	lcl|HrpK1|(helper)	-7
44	-	noneffector cobP - cobalamin synth 1481776:1482285 reverse MW:18612	-7
45	-	ORFD CDS corresponding to COG1960 31472:32650 reverse MW:43186	-5
46	-	noneffector RedA 2097073:2098179 reverse MW:39377	-5
47	-	noneffector FlgB 1252308:1252694 reverse MW:14048	-4
48	-	ORFN CDS corresponding to COG1643 140826:141968 reverse MW:43105	-3
49	-	noneffector virA (Ag tum) 1319484:1320893 forward MW:51758	-3
50	-	ORFA CDS corresponding to COG1802 16745:17479 forward MW:27446	-1
51	-	ORFL CDS corresponding to COG3131 121344:122930 forward MW:59390	-1
52	-	noneffector TolC - OM protein 406545:407951 forward MW:51594	-1
53	-	noneffector FruR - repressor 3797395:3798375 forward MW:35926	0
54	-	ORFH CDS corresponding to COG0252 77291:78292 forward MW:35292	1
55	-	ORFR CDS corresponding to COG1466 210826:211899 forward MW:38797	1
56	-	noneffector Asg1-asparaginase 77288:78313 forward MW:35978	1
57	-	noneffector FimD 4959316:4961814 reverse MW:90480	1
58	-	noneffector ThrC-threonine synthase 1740761:1742167 reverse MW:51820	1
59	-	noneffector TrxB-reductase 703024:703998 reverse MW:34254	1
60	-	noneffector ParE topoisomerase 385222:387126 reverse MW:69614	2
61	-	noneffector SecD 1812570:1815368 reverse MW:100890	2
62	-	ORFQ CDS corresponding to COG0495 207522:210125 forward MW:96968	3
63	-	ORFT CDS corresponding to COG0378 317245:317859 forward MW:22060	3
64	-	ORFU CDS corresponding to COG3241 330331:330774 reverse MW:16020	3
65	-	noneffector DnlJ-DNA ligase 3210899:3211855 reverse MW:34767	3
66	-	noneffector FliM flagellar motor switch 1210521:1211486 reverse MW:35961	3
67	-	noneffector hxkG glucokinase 1952130:1953080 reverse MW:33857	3
68	-	noneffector MetX homoserine transferase 505995:507131 forward MW:41749	4
69	-	ORFE CDS corresponding to COG3288 and COG0686 34197:35270 forward MW:37302	5
70	-	ORFJ CDS corresponding to COG0439 87975:89513 reverse MW:56448	5
71	-	ORFO CDS corresponding to COG0001 197909:199189 forward MW:45378	5
72	-	noneffector HlyB 2755746:2757272 reverse MW:56284	5
73	-	noneffector CobK precorrin reductase 285383:286105 forward MW:26572	5
74	-	ORFK CDS corresponding to COG0210 92609:94720 forward MW:79022	6
75	-	noneffector SpeA-arg decarboxylase 238939:240852 forward MW:71480	6
76	-	ORFF CDS corresponding to COG1282 35604:37055 forward MW:50424	7
77	-	noneffector PilT 502445:503482 reverse MW:38154	7
78	-	noneffector Rnr RNase 348053:350386 reverse MW:87676	7
79	-	noneffector ChrR transcript act 854053:854700 forward MW:23837	7
80	-	noneffector GalE glucose epimerase 6090538:6091563 reverse MW:37533	8
81	-	noneffector GntP gluconate permease 6090538:6091563 reverse MW:37533	8
82	-	ORFC CDS corresponding to COG1804 30239:31456 reverse MW:42989	9
83	-	ORFG CDS corresponding to COG1773 45521:45685 reverse MW:6178	9
84	-	ORFV CDS corresponding to COG0359 344706:345149 reverse MW:15470	9
85	-	noneffector PilG 493913:494308 reverse MW:14478	9
86	-	noneffector hisQ his transport 1370248:1370937 reverse MW:24989	9
87	-	noneffector OmpR porin 1522352:1523068 reverse MW:26725	9
88	-	noneffector NifU 1805306:1805683 reverse MW:13638	9
89	-	noneffector GM4D-mannose dehydratase 894205:895125 forward MW:33149	10
90	-	ORFI CDS corresponding to COG1038, COG3632 and COG0511 86064:87869 reverse MW:	11
91	-	ORFS CDS corresponding to COG0772 219600:220742 reverse MW:41694	11
92	-	noneffector BacA-bacitracin synthase 1027410:1035326 reverse MW:291730	11
93	-	noneffector RodA shape controlling protein 219591:220751 reverse MW:42312	11
94	-	noneffector TatC translocase 623214:624014 forward MW:29949	11
95	-	noneffector PhyA-phytochrome 1286823:1289051 reverse MW:82028	12
96	-	noneffector DhsC succ dehydrogenase 952897:953268 reverse MW:13354	12
97	-	ORFM CDS corresponding to COG3436 123410:124960 reverse MW:58530	13
98	-	noneffector XerD-integrase 1744612:1745490 reverse MW:33142	13
99	-	noneffector HydG regulator 1222590:1224002 reverse MW:50809	13
100	-	noneffector HolC DNA poly 1977943:1978368 forward MW:16203	13
101	-	ORFB CDS corresponding to COG1020 20051:23497 forward MW:127464	15
102	-	ORFW CDS corresponding to COG0238 346108:346335 reverse MW:8917	15
103	-	ORFY CDS corresponding to COG0323 360755:362689 reverse MW:70973	15
104	-	noneffector CheY - chemotaxis 1200416:1200793 reverse MW:14157	15
105	-	noneffector TyrB - aminotransferase 3646637:3647830 reverse MW:43374	15
106	-	noneffector MotB chemotaxis 369865:370794 reverse MW:33457	15
107	-	noneffector ArgT-aabinding 3670179:3670937 forward MW:28093	16
108	-	noneffector CisY - citrate synthase 953632:954918 forward MW:47589	16
109	-	noneffector TrpB-tryptophan synthase 4656327:4657583 reverse MW:45385	16
110	-	ORFZ CDS corresponding to COG0188 381434:383686 reverse MW:82799	17
111	-	noneffector EftS-elongation factor 1673006:1673854 reverse MW:30184	17
112	-	noneffector tolR 2767453:2767890 reverse MW:15967	17
113	-	noneffector Ure3 urease 299604:299927 forward MW:11653	17
114	-	noneffector PilI 492938:493471 reverse MW:20348	17
115	-	ORFX CDS corresponding to COG0360 346367:346765 reverse MW:15252	18
116	-	ORFP CDS corresponding to COG1702 202108:203061 forward MW:35735	19
117	-	noneffector AraJ 2479645:2480781 forward MW:38854	19
118	-	noneffector VinT integrase 781306:782460 forward MW:43783	23
