# Supplementary material for: Functional and Computational Analysis of Amino Acid Patterns Predictive of Type III Secretion System Substrates in Pseudomonas syringae
Source: PLoS One. 2012 Apr 27;7(4):e36038. doi: 10.1371/journal.pone.0036038 (PMC3338616; doi:10.1371/journal.pone.0036038)
Supplement: Table S3 — TEREE algorithm scores for annotated coding regions in P. s. phaseolicola 1448a. (XLSX) [file pone.0036038.s003.xlsx]

## Sheet: Sheet1
RANK	Validated T3SS substrates (potential new Hops also indicated)	Definition	TEREE Score
1	HopAF1	gi|71734506|ref|YP_273699.1| type III effector HopAF1 [Pseudomonas syringae pv.	-41
2	HopX1	gi|71737445|ref|YP_273555.1| type III effector HopX1 [Pseudomonas syringae pv.	-37
3	HopD1	gi|71725170|ref|YP_272137.1| type III effector HopD1 [Pseudomonas syringae pv.	-35
4	AvrRps4	gi|71725242|ref|YP_272198.1| type III effector AvrRps4 [Pseudomonas syringae pv	-35
5	HopQ1	gi|71725175|ref|YP_272139.1| type III effector HopQ1 [Pseudomonas syringae pv.	-32
6	HopG1	gi|71735140|ref|YP_273053.1| type III effector HopG1 [Pseudomonas syringae pv.	-31
7	HopAK1	gi|71737315|ref|YP_273680.1| type III helper protein HopAK1 [Pseudomonas syring	-29
8	HopF3	gi|71737463|ref|YP_275650.1| type III effector HopF3 [Pseudomonas syringae pv.	-29
9	HopAY1	gi|71725194|ref|YP_272236.1| virulence surface antigen protein [Pseudomonas syr	-29
10	HopAS1	gi|71737300|ref|YP_276837.1| type III effector HopAS1 [Pseudomonas syringae pv.	-27
11		gi|71735341|ref|YP_273552.1| type III secretion component protein HrcJ [Pseudom	-26
12		gi|71734884|ref|YP_273585.1| hypothetical protein PSPPH_1327 [Pseudomonas syrin	-25
13		gi|71737725|ref|YP_274770.1| hypothetical protein PSPPH_2575 [Pseudomonas syrin	-25
14		gi|71735210|ref|YP_275797.1| competence protein ComEA [Pseudomonas syringae pv.	-25
15		gi|71736909|ref|YP_272624.1| ABC transporter ATP-binding protein [Pseudomonas s	-24
16	AvrB4-2	gi|71735576|ref|YP_273068.1| type III effector AvrB4-2 [Pseudomonas syringae pv	-23
17	HopAE1	gi|71736669|ref|YP_276443.1| type III effector HopAE1 [Pseudomonas syringae pv.	-23
18	HopR1	gi|71737260|ref|YP_272478.1| type III effector HopR1 [Pseudomonas syringae pv.	-21
19	new Hop?	gi|71733491|ref|YP_273779.1| hypothetical protein PSPPH_1525 [Pseudomonas syrin	-21
20		gi|71735234|ref|YP_274434.1| hypothetical protein PSPPH_2223 [Pseudomonas syrin	-21
21	AvrB4-1	gi|71736352|ref|YP_275207.1| type III effector AvrB4-1 [Pseudomonas syringae pv	-21
22	HopW1-1	gi|71725191|ref|YP_272136.1| type III effector HopW1-1, truncated [Pseudomonas	-21
23	HopAB1	gi|71725172|ref|YP_272234.1| type III effector HopAB1 [Pseudomonas syringae pv.	-21
24	new Hop?	gi|71725261|ref|YP_272239.1| shikimate kinase, PSPPH_A0133	-21
25	HopW1-2	gi|71725264|ref|YP_272191.1| type III effector HopW1-2, truncated [Pseudomonas	-21
26		gi|71734796|ref|YP_272907.1| hypothetical protein PSPPH_0607 [Pseudomonas syrin	-21
27	AvrE1	gi|71734405|ref|YP_273527.1| type III effector AvrE1 [Pseudomonas syringae pv.	-21
28	HrpP	gi|71733220|ref|YP_273547.1| type III secretion protein HrpP [Pseudomonas syrin	-21
29		gi|71737733|ref|YP_273775.1| topoisomerase domain-containing protein [Pseudomon	-19
30		gi|71734228|ref|YP_273783.1| polygalacturonase [Pseudomonas syringae pv. phaseo	-19
31		gi|71735257|ref|YP_274224.1| calcium-binding protein [Pseudomonas syringae pv.	-19
32		gi|71738170|ref|YP_274667.1| hypothetical protein PSPPH_2470 [Pseudomonas syrin	-19
33		gi|71738040|ref|YP_275489.1| hypothetical protein PSPPH_3331 [Pseudomonas syrin	-19
34	extracellular flagellum component	gi|71736277|ref|YP_275533.1| flagellar hook-length control protein FliK [Pseudo	-19
35	HopAU1	gi|71725205|ref|YP_272154.1| type III effector HopAU1 [Pseudomonas syringae pv.	-19
36		gi|71733916|ref|YP_272590.1| amino acid ABC transporter periplasmic amino acid-	-19
37		gi|71735595|ref|YP_275426.1| TonB-dependent siderophore receptor [Pseudomonas s	-19
38		gi|71734002|ref|YP_276640.1| TonB-dependent receptor [Pseudomonas syringae pv.	-19
39		gi|71736221|ref|YP_272803.1| hypothetical protein PSPPH_0501 [Pseudomonas syrin	-18
40		gi|71733730|ref|YP_273003.1| LysR family transcriptional regulator [Pseudomonas	-18
41		gi|71734763|ref|YP_273375.1| alginate biosynthesis protein AlgA [Pseudomonas sy	-18
42		gi|71734646|ref|YP_273708.1| Rhs family protein [Pseudomonas syringae pv. phase	-17
43		gi|71734880|ref|YP_273722.1| hypothetical protein PSPPH_1467 [Pseudomonas syrin	-17
44		gi|71734521|ref|YP_274976.1| zona occludens toxin [Pseudomonas syringae pv. pha	-17
45		gi|71734065|ref|YP_275228.1| hypothetical protein PSPPH_3052 [Pseudomonas syrin	-17
46		gi|71734109|ref|YP_275562.1| flagellar basal-body protein [Pseudomonas syringae	-17
47		gi|71735125|ref|YP_277256.1| adenylylsulfate kinase [Pseudomonas syringae pv. p	-17
48		gi|71737406|ref|YP_272623.1| TauD/TfdA family dioxygenase [Pseudomonas syringae	-17
49		gi|71733844|ref|YP_273018.1| type IV pilin [Pseudomonas syringae pv. phaseolico	-17
50		gi|71736633|ref|YP_274867.1| LexA repressor [Pseudomonas syringae pv. phaseolic	-17
51		gi|71733702|ref|YP_276584.1| hypothetical protein PSPPH_4468 [Pseudomonas syrin	-16
52		gi|71734926|ref|YP_277135.1| ferric siderophore transporter, periplasmic energy	-16
53		gi|71734204|ref|YP_272640.1| acyl-CoA dehydrogenase family protein [Pseudomonas	-16
54		gi|71733421|ref|YP_272827.1| hypothetical protein PSPPH_0525 [Pseudomonas syrin	-16
55		gi|71737256|ref|YP_272905.1| O-antigen ABC transporter permease [Pseudomonas sy	-16
56		gi|71733278|ref|YP_273300.1| hypothetical protein PSPPH_1029 [Pseudomonas syrin	-15
57		gi|71733409|ref|YP_273501.1| isochorismatase family protein [Pseudomonas syring	-15
58		gi|71734541|ref|YP_273517.1| transketolase, C-terminal subunit [Pseudomonas syr	-15
59	HrpA2	gi|71735268|ref|YP_273531.1| type III helper protein HrpA2 [Pseudomonas syringa	-15
60	HrpK1	gi|71733886|ref|YP_273554.1| type III effector HrpK1 [Pseudomonas syringae pv.	-15
61		gi|71735073|ref|YP_273612.1| 30S ribosomal protein S16 [Pseudomonas syringae pv	-15
62		gi|71733583|ref|YP_273686.1| leucine-rich repeat-containing protein [Pseudomona	-15
63		gi|71737614|ref|YP_274070.1| hypothetical protein PSPPH_1838 [Pseudomonas syrin	-15
64		gi|71736899|ref|YP_274105.1| sensor histidine kinase [Pseudomonas syringae pv.	-15
65		gi|71736768|ref|YP_274141.1| MbtH-like protein [Pseudomonas syringae pv. phaseo	-15
66		gi|71735429|ref|YP_274921.1| coniferyl aldehyde dehydrogenase [Pseudomonas syri	-15
67		gi|71737971|ref|YP_275185.1| GntR family transcriptional regulator [Pseudomonas	-15
68		gi|71734417|ref|YP_275346.1| sugar ABC transporter ATP-binding protein [Pseudom	-15
69	extracellular flagellum component	gi|71733403|ref|YP_275550.1| flagellin [Pseudomonas syringae pv. phaseolicola 1	-15
70	extracellular flagellum component	gi|71737896|ref|YP_275564.1| flagellar basal body rod modification protein [Pse	-15
71		gi|71737330|ref|YP_275565.1| flagellar basal body rod protein FlgC [Pseudomonas	-15
72	extracellular flagellum component	gi|71736807|ref|YP_275573.1| flagellin synthesis, negative regulator, FlgM [Pse	-15
73		gi|71734303|ref|YP_275627.1| sensory box sensor histidine kinase/response regul	-15
74	HopI1	gi|71733578|ref|YP_276482.1| type III effector HopI1 [Pseudomonas syringae pv.	-15
75		gi|71733674|ref|YP_276799.1| non-ribosomal peptide synthetase [Pseudomonas syri	-15
76		gi|71737276|ref|YP_276879.1| protein insertion permease FtsX [Pseudomonas syrin	-15
77		gi|71736330|ref|YP_276889.1| phosphopantetheine adenylyltransferase [Pseudomona	-15
78		gi|71736779|ref|YP_276961.1| cadmium-translocating P-type ATPase [Pseudomonas s	-15
79	AvrB2	gi|71725167|ref|YP_272229.1| type III effector AvrB2 [Pseudomonas syringae pv.	-15
80		gi|71733690|ref|YP_273610.1| cytochrome C assembly family protein [Pseudomonas	-15
81		gi|71737146|ref|YP_273685.1| 3-oxoacyl-(acyl carrier protein) synthase III [Pse	-15
82		gi|71733849|ref|YP_275328.1| ATP-dependent DNA ligase [Pseudomonas syringae pv.	-15
83		gi|71736282|ref|YP_272800.1| alginate lyase [Pseudomonas syringae pv. phaseolic	-14
84		gi|71737660|ref|YP_272957.1| hypothetical protein PSPPH_0658 [Pseudomonas syrin	-14
85		gi|71733323|ref|YP_273992.1| membrane protein [Pseudomonas syringae pv. phaseol	-14
86		gi|71736767|ref|YP_274038.1| GTP cyclohydrolase I [Pseudomonas syringae pv. pha	-13
87	HopV1	gi|123979205|ref|YP_274552.2| type III effector HopV1 [Pseudomonas syringae pv.	-13
88		gi|71733831|ref|YP_275311.1| glycosyl transferase, group 2 family protein [Pseu	-13
89		gi|71735211|ref|YP_275528.1| flagellar biosynthesis protein FliP [Pseudomonas s	-13
90		gi|71737685|ref|YP_275551.1| 3-oxoacyl-(acyl-carrier-protein) synthase III [Pse	-13
91	extracellular flagellum component	gi|71733906|ref|YP_275555.1| flagellar hook-associated protein FlgK [Pseudomona	-13
92	extracellular flagellum component	gi|71736953|ref|YP_275563.1| flagellar hook protein FlgE [Pseudomonas syringae	-13
93		gi|71733691|ref|YP_275719.1| hypothetical protein PSPPH_3571 [Pseudomonas syrin	-13
94		gi|71736174|ref|YP_275902.1| hypothetical protein PSPPH_3760 [Pseudomonas syrin	-13
95		gi|71734604|ref|YP_275999.1| hypothetical protein PSPPH_3861 [Pseudomonas syrin	-13
96		gi|71735033|ref|YP_276284.1| pmbA protein [Pseudomonas syringae pv. phaseolicol	-13
97		gi|71737243|ref|YP_276838.1| response regulator [Pseudomonas syringae pv. phase	-13
98		gi|71735282|ref|YP_277008.1| carboxyl-terminal protease family protein [Pseudom	-13
99		gi|71735113|ref|YP_277160.1| hypothetical protein PSPPH_5078 [Pseudomonas syrin	-13
100		gi|71733543|ref|YP_272652.1| histidine utilization repressor [Pseudomonas syrin	-13
101		gi|71733209|ref|YP_272954.1| prophage PSPPH01 cellulase [Pseudomonas syringae p	-13
102		gi|71737721|ref|YP_273285.1| hypothetical protein PSPPH_1014 [Pseudomonas syrin	-13
103	HrpW1	gi|71735929|ref|YP_273524.1| type III helper protein HrpW1 [Pseudomonas syringa	-12
104		gi|71735959|ref|YP_274622.1| LysR family transcriptional regulator [Pseudomonas	-12
105		gi|71733476|ref|YP_274683.1| acetyltransferase [Pseudomonas syringae pv. phaseo	-12
106		gi|71734798|ref|YP_274764.1| glutathione-independent formaldehyde dehydrogenase	-12
107		gi|71735512|ref|YP_275133.1| senescence marker protein-30 family protein [Pseud	-12
108		gi|71737873|ref|YP_277175.1| NAD(P) transhydrogenase subunit alpha part 1 [Pseu	-12
109		gi|71735349|ref|YP_277216.1| transcriptional regulator [Pseudomonas syringae pv	-12
110		gi|71737818|ref|YP_272531.1| DNA-binding protein [Pseudomonas syringae pv. phas	-12
111		gi|71733612|ref|YP_272969.1| prophage PSPPH01, ImpB/MucB/SamB family protein [P	-12
112		gi|71737220|ref|YP_273095.1| hypothetical protein PSPPH_0813 [Pseudomonas syrin	-12
113		gi|71736099|ref|YP_273148.1| Uma3 [Pseudomonas syringae pv. phaseolicola 1448A]	-11
114		gi|71735655|ref|YP_273200.1| 3-phosphoshikimate 1-carboxyvinyltransferase [Pseu	-11
115		gi|71734835|ref|YP_273318.1| luciferase family protein [Pseudomonas syringae pv	-11
116		gi|71737933|ref|YP_273389.1| PhoH-like protein [Pseudomonas syringae pv. phaseo	-11
117		gi|71734223|ref|YP_273420.1| valyl-tRNA synthetase [Pseudomonas syringae pv. ph	-11
118		gi|71736949|ref|YP_273533.1| type III secretion component protein HrpB [Pseudom	-11
119		gi|71735391|ref|YP_273595.1| hypothetical protein PSPPH_1337 [Pseudomonas syrin	-11
120		gi|71736891|ref|YP_273736.1| lipoprotein [Pseudomonas syringae pv. phaseolicola	-11
121		gi|71736617|ref|YP_273742.1| hypothetical protein PSPPH_1488 [Pseudomonas syrin	-11
122		gi|71734069|ref|YP_274156.1| TonB-dependent siderophore receptor [Pseudomonas s	-11
123		gi|71735359|ref|YP_274234.1| type I fimbrial protein FimA [Pseudomonas syringae	-11
124		gi|71737097|ref|YP_274253.1| Slt family transglycosylase [Pseudomonas syringae	-11
125		gi|71735757|ref|YP_274335.1| hypothetical protein PSPPH_2116 [Pseudomonas syrin	-11
126		gi|71737141|ref|YP_274338.1| hypothetical protein PSPPH_2119 [Pseudomonas syrin	-11
127		gi|71737791|ref|YP_274342.1| hypothetical protein PSPPH_2123 [Pseudomonas syrin	-11
128		gi|71735081|ref|YP_274383.1| luciferase family protein [Pseudomonas syringae pv	-11
129		gi|71733556|ref|YP_274399.1| metalloprotease [Pseudomonas syringae pv. phaseoli	-11
130		gi|71734269|ref|YP_274428.1| zinc carboxypeptidase domain-containing protein [P	-11
131		gi|71736098|ref|YP_274711.1| hypothetical protein PSPPH_2515 [Pseudomonas syrin	-11
132		gi|71737689|ref|YP_274758.1| GntR family transcriptional regulator [Pseudomonas	-11
133		gi|71738043|ref|YP_274780.1| RC220 [Pseudomonas syringae pv. phaseolicola 1448A	-11
134		gi|71738154|ref|YP_274790.1| mannitol ABC transporter periplasmic mannitol-bind	-11
135		gi|71733299|ref|YP_275050.1| hypothetical protein PSPPH_2866 [Pseudomonas syrin	-11
136		gi|71734816|ref|YP_275139.1| TonB-dependent siderophore receptor [Pseudomonas s	-11
137		gi|71735819|ref|YP_275353.1| methylmalonate-semialdehyde dehydrogenase [Pseudom	-11
138		gi|71737967|ref|YP_275417.1| gluconate utilization system GNT-I transcriptional	-11
139		gi|71733444|ref|YP_275529.1| flagellar protein FliO [Pseudomonas syringae pv. p	-11
140		gi|71733775|ref|YP_275624.1| hydantoin racemase [Pseudomonas syringae pv. phase	-11
141		gi|71736720|ref|YP_275851.1| hypothetical protein PSPPH_3709 [Pseudomonas syrin	-11
142		gi|71736072|ref|YP_276227.1| cell division protein FtsQ [Pseudomonas syringae p	-11
143		gi|71735690|ref|YP_276228.1| D-alanine--D-alanine ligase [Pseudomonas syringae	-11
144		gi|71734516|ref|YP_276307.1| polynucleotide phosphorylase/polyadenylase [Pseudo	-11
145		gi|71733923|ref|YP_276313.1| hypothetical protein PSPPH_4191 [Pseudomonas syrin	-11
146		gi|71736707|ref|YP_276361.1| hypothetical protein PSPPH_4243 [Pseudomonas syrin	-11
147		gi|71737684|ref|YP_276382.1| dipeptide ABC transporter permease [Pseudomonas sy	-11
148		gi|71733981|ref|YP_276617.1| GTP cyclohydrolase II [Pseudomonas syringae pv. ph	-11
149		gi|71735172|ref|YP_276665.1| non-ribosomal peptide synthetase [Pseudomonas syri	-11
150		gi|71737508|ref|YP_276746.1| YccA [Pseudomonas syringae pv. phaseolicola 1448A]	-11
151		gi|71735666|ref|YP_276772.1| ethanolamine ammonia-lyase, heavy subunit [Pseudom	-11
152		gi|71733653|ref|YP_276807.1| pyrroloquinoline quinone biosynthesis protein PqqB	-11
153		gi|71736058|ref|YP_276847.1| glycine betaine/L-proline ABC transporter periplas	-11
154		gi|71738003|ref|YP_277031.1| hypothetical protein PSPPH_4943 [Pseudomonas syrin	-11
155		gi|71733596|ref|YP_272915.1| hypothetical protein PSPPH_0615 [Pseudomonas syrin	-11
156		gi|71736598|ref|YP_273319.1| TetR family transcriptional regulator [Pseudomonas	-11
157		gi|161611341|ref|YP_273419.2| SAM-dependent methyltransferase [Pseudomonas syri	-11
158		gi|71738012|ref|YP_273946.1| membrane-bound lytic murein transglycosylase D [Ps	-10
159		gi|71737274|ref|YP_274412.1| hypothetical protein PSPPH_2200 [Pseudomonas syrin	-10
160		gi|71734753|ref|YP_274692.1| DNA polymerase II [Pseudomonas syringae pv. phaseo	-10
161		gi|71733960|ref|YP_274696.1| radical SAM domain-containing protein [Pseudomonas	-10
162		gi|71737932|ref|YP_275395.1| C4-dicarboxylate transporter/malic acid transport	-10
163		gi|71736734|ref|YP_275406.1| homogentisate 1,2-dioxygenase [Pseudomonas syringa	-10
164	extracellular flagellum component	gi|71733470|ref|YP_275554.1| flagellar hook-associated protein FlgL [Pseudomona	-10
165		gi|71734900|ref|YP_275643.1| mechanosensitive ion channel family protein [Pseud	-10
166		gi|71736265|ref|YP_276494.1| ribosomal large subunit pseudouridine synthase E [	-10
167		gi|71736346|ref|YP_277038.1| prophage PSPPH06 tail fiber protein [Pseudomonas s	-10
168		gi|71733587|ref|YP_272571.1| lipoprotein [Pseudomonas syringae pv. phaseolicola	-10
169		gi|71735982|ref|YP_272627.1| hypothetical protein PSPPH_0324 [Pseudomonas syrin	-10
170		gi|71734424|ref|YP_272715.1| 3-oxoacyl-(acyl carrier protein) synthase II [Pseu	-10
171		gi|71733383|ref|YP_272797.1| acyl-CoA dehydrogenase family protein [Pseudomonas	-9
172		gi|71737588|ref|YP_272929.1| thiosulfate sulfurtransferase [Pseudomonas syringa	-9
173		gi|71735112|ref|YP_272935.1| organic solvent tolerance protein [Pseudomonas syr	-9
174		gi|71733447|ref|YP_273047.1| type IV pilus protein PilV2 , truncated [Pseudomon	-9
175		gi|71737677|ref|YP_273057.1| EAL domain-containing protein [Pseudomonas syringa	-9
176		gi|71736350|ref|YP_273133.1| glucose-6-phosphate isomerase [Pseudomonas syringa	-9
177		gi|71736916|ref|YP_273291.1| hypothetical protein PSPPH_1020 [Pseudomonas syrin	-9
178		gi|71735948|ref|YP_273440.1| TonB-dependent outer membrane heme receptor [Pseud	-9
179		gi|71737187|ref|YP_273452.1| porin B [Pseudomonas syringae pv. phaseolicola 144	-9
180		gi|71737686|ref|YP_273528.1| lytic murein transglycosylase [Pseudomonas syringa	-9
181		gi|71735899|ref|YP_273678.1| hypothetical protein PSPPH_1422 [Pseudomonas syrin	-9
182		gi|71733267|ref|YP_273705.1| Rhs family protein [Pseudomonas syringae pv. phase	-9
183		gi|71737591|ref|YP_273748.1| hypothetical protein PSPPH_1494 [Pseudomonas syrin	-9
184		gi|71734022|ref|YP_273945.1| ABC transporter periplasmic substrate-binding prot	-9
185		gi|71736639|ref|YP_274052.1| hypothetical protein PSPPH_1819 [Pseudomonas syrin	-9
186		gi|71735294|ref|YP_274236.1| LuxR family transcriptional regulator [Pseudomonas	-9
187		gi|71737165|ref|YP_274275.1| 2-methylisocitrate lyase [Pseudomonas syringae pv.	-9
188		gi|71737593|ref|YP_274518.1| insecticidal toxin complex protein [Pseudomonas sy	-9
189		gi|71734402|ref|YP_274553.1| endoribonuclease L-PSP [Pseudomonas syringae pv. p	-9
190		gi|71737964|ref|YP_274636.1| translation initiation inhibitor [Pseudomonas syri	-9
191		gi|71733751|ref|YP_274677.1| hypothetical protein PSPPH_2480 [Pseudomonas syrin	-9
192		gi|71736300|ref|YP_274688.1| LysR family transcriptional regulator [Pseudomonas	-9
193		gi|71735682|ref|YP_274746.1| oxidoreductase [Pseudomonas syringae pv. phaseolic	-9
194		gi|71738004|ref|YP_274759.1| oxidoreductase [Pseudomonas syringae pv. phaseolic	-9
195		gi|71738011|ref|YP_274762.1| hypothetical protein PSPPH_2567 [Pseudomonas syrin	-9
196		gi|71733768|ref|YP_274785.1| hypothetical protein PSPPH_2591 [Pseudomonas syrin	-9
197		gi|71733717|ref|YP_274837.1| glycosyl hydrolase family protein [Pseudomonas syr	-9
198		gi|71736981|ref|YP_274927.1| glutamate-1-semialdehyde aminotransferase [Pseudom	-9
199		gi|71735629|ref|YP_274939.1| diaminobutyrate--2-oxoglutarate aminotransferase [	-9
200		gi|71735378|ref|YP_274949.1| achromobactin transport ATP-binding protein CbrD [	-9
201		gi|71736638|ref|YP_274959.1| glutamate-1-semialdehyde 2,1-aminomutase [Pseudomo	-9
202		gi|71734985|ref|YP_275051.1| hypothetical protein PSPPH_2867 [Pseudomonas syrin	-9
203		gi|71736783|ref|YP_275104.1| peptide ABC transporter periplasmic peptide-bindin	-9
204		gi|71737116|ref|YP_275111.1| phosphonate metabolism protein PhnM [Pseudomonas s	-9
205		gi|71737339|ref|YP_275121.1| phosphonate ABC transporter ATP-binding protein [P	-9
206		gi|71733559|ref|YP_275178.1| mandelate racemase/muconate lactonizing enzyme fam	-9
207		gi|71733493|ref|YP_275225.1| GntR family transcriptional regulator [Pseudomonas	-9
208		gi|71737616|ref|YP_275348.1| Gfo/Idh/MocA family oxidoreductase [Pseudomonas sy	-9
209		gi|71737076|ref|YP_275438.1| LysR family transcriptional regulator [Pseudomonas	-9
210		gi|71736081|ref|YP_275510.1| adenine phosphoribosyltransferase [Pseudomonas syr	-9
211	extracellular flagellum component	gi|71736592|ref|YP_275549.1| flagellin FlaG [Pseudomonas syringae pv. phaseolic	-9
212		gi|71736394|ref|YP_275588.1| decarboxylase family protein [Pseudomonas syringae	-9
213		gi|71735568|ref|YP_275676.1| acetyl-CoA synthetase [Pseudomonas syringae pv. ph	-9
214		gi|71736239|ref|YP_275846.1| NLP/P60 family protein [Pseudomonas syringae pv. p	-9
215		gi|71735999|ref|YP_275856.1| hypothetical protein PSPPH_3714 [Pseudomonas syrin	-9
216		gi|71736700|ref|YP_275888.1| hypothetical protein PSPPH_3746 [Pseudomonas syrin	-9
217		gi|71736591|ref|YP_275958.1| phosphopyruvate hydratase [Pseudomonas syringae pv	-9
218		gi|71737701|ref|YP_276030.1| molybdopterin-binding oxidoreductase [Pseudomonas	-9
219		gi|71737678|ref|YP_276053.1| hypothetical protein PSPPH_3917 [Pseudomonas syrin	-9
220		gi|71737046|ref|YP_276057.1| hypothetical protein PSPPH_3921 [Pseudomonas syrin	-9
221		gi|71733233|ref|YP_276376.1| peptide ABC transporter periplasmic peptide-bindin	-9
222		gi|71738156|ref|YP_276379.1| OprD family outer membrane porin [Pseudomonas syri	-9
223		gi|71737753|ref|YP_276389.1| hypothetical protein PSPPH_4271 [Pseudomonas syrin	-9
224		gi|71733777|ref|YP_276479.1| hypothetical protein PSPPH_4363 [Pseudomonas syrin	-9
225		gi|71735662|ref|YP_276487.1| D-galactose 1-dehydrogenase [Pseudomonas syringae	-9
226		gi|71734258|ref|YP_276492.1| hypothetical protein PSPPH_4376 [Pseudomonas syrin	-9
227		gi|71734872|ref|YP_276514.1| hypothetical protein PSPPH_4398 [Pseudomonas syrin	-9
228		gi|71736016|ref|YP_276542.1| esterase/lipase/thioesterase family protein [Pseud	-9
229		gi|71734434|ref|YP_276711.1| 30S ribosomal protein S12 [Pseudomonas syringae pv	-9
230		gi|71733603|ref|YP_276817.1| hypothetical protein PSPPH_4716 [Pseudomonas syrin	-9
231		gi|71735963|ref|YP_276937.1| DeoR family transcriptional regulator [Pseudomonas	-9
232		gi|71734966|ref|YP_276967.1| dinucleoside polyphosphate hydrolase [Pseudomonas	-9
233		gi|71736301|ref|YP_277165.1| methyl-accepting chemotaxis protein [Pseudomonas s	-9
234		gi|71736096|ref|YP_277222.1| RpiR family transcriptional regulator [Pseudomonas	-9
235		gi|71736675|ref|YP_277248.1| LuxR family DNA-binding response regulator [Pseudo	-9
236		gi|71733339|ref|YP_277280.1| F0F1 ATP synthase subunit beta [Pseudomonas syring	-9
237		gi|71725259|ref|YP_272170.1| hypothetical protein PSPPH_A0051 [Pseudomonas syri	-9
238	HopAV1	gi|71725253|ref|YP_272174.1| type III effector HopAV1 [Pseudomonas syringae pv.	-9
239		gi|71735560|ref|YP_272346.1| DOPA 4,5-dioxygenase-like protein [Pseudomonas syr	-9
240		gi|71737988|ref|YP_272771.1| hypothetical protein PSPPH_0468 [Pseudomonas syrin	-9
241		gi|71737375|ref|YP_272802.1| hypothetical protein PSPPH_0500 [Pseudomonas syrin	-9
242		gi|71736473|ref|YP_273107.1| hypothetical protein PSPPH_0826 [Pseudomonas syrin	-8
243		gi|71735813|ref|YP_273472.1| acetyltransferase [Pseudomonas syringae pv. phaseo	-8
244		gi|71737748|ref|YP_273628.1| sensory box histidine kinase/response regulator [P	-8
245		gi|71735823|ref|YP_273681.1| MaoC-like domain-containing protein [Pseudomonas s	-8
246		gi|71733810|ref|YP_273984.1| non-ribosomal peptide synthetase [Pseudomonas syri	-8
247		gi|71733473|ref|YP_274011.1| chromosome segregation protein SMC [Pseudomonas sy	-8
248		gi|71736434|ref|YP_274938.1| outer membrane ferric siderophore receptor [Pseudo	-8
249		gi|71736901|ref|YP_274975.1| ABC-type dipeptide/oligopeptide/nickel transport s	-8
250		gi|71736958|ref|YP_275131.1| methyl-accepting chemotaxis protein [Pseudomonas s	-8
251		gi|71738030|ref|YP_275214.1| TonB-dependent siderophore receptor [Pseudomonas s	-8
252		gi|71733584|ref|YP_275230.1| general secretion pathway protein GspD [Pseudomona	-8
253		gi|71734774|ref|YP_275636.1| alpha/beta fold family hydrolase [Pseudomonas syri	-8
254		gi|71734422|ref|YP_276413.1| phage integrase family site specific recombinase [	-8
255		gi|71735671|ref|YP_276683.1| 30S ribosomal protein S11 [Pseudomonas syringae pv	-8
256		gi|71738079|ref|YP_277264.1| sucrose porin [Pseudomonas syringae pv. phaseolico	-8
257		gi|71725268|ref|YP_272167.1| plasmid partition protein ParA, putative [Pseudomo	-8
258		gi|123979206|ref|YP_001012222.1| HrpL-regulated protein [Pseudomonas syringae p	-8
259		gi|71737666|ref|YP_272489.1| hypothetical protein PSPPH_0184 [Pseudomonas syrin	-8
260		gi|71737295|ref|YP_272508.1| exodeoxyribonuclease III [Pseudomonas syringae pv.	-8
261		gi|71737579|ref|YP_272550.1| S1 RNA-binding domain-containing protein [Pseudomo	-7
262		gi|71736841|ref|YP_272572.1| hydroperoxidase II [Pseudomonas syringae pv. phase	-7
263		gi|71733604|ref|YP_272898.1| N-acylglucosamine 2-epimerase (GlcNAc 2-epimerase)	-7
264		gi|71737955|ref|YP_272961.1| prophage PSPPH01, 43 kDa tail protein [Pseudomonas	-7
265		gi|71736307|ref|YP_273048.1| hypothetical protein PSPPH_0761 [Pseudomonas syrin	-7
266		gi|71735862|ref|YP_273071.1| ISPsy21, transposase orfB [Pseudomonas syringae pv	-7
267		gi|71736932|ref|YP_273233.1| glucose-1-phosphate cytidylyltransferase [Pseudomo	-7
268		gi|71733759|ref|YP_273260.1| GTP-dependent nucleic acid-binding protein EngD [P	-7
269		gi|71736862|ref|YP_273327.1| pressure-regulated protein [Pseudomonas syringae p	-7
270		gi|71734168|ref|YP_273345.1| flavodoxin [Pseudomonas syringae pv. phaseolicola	-7
271		gi|71736757|ref|YP_273380.1| alginate biosynthesis protein AlgX [Pseudomonas sy	-7
272		gi|71735932|ref|YP_273398.1| amino acid ABC transporter periplasmic amino acid-	-7
273		gi|71737225|ref|YP_273470.1| hypothetical protein PSPPH_1204 [Pseudomonas syrin	-7
274		gi|71734182|ref|YP_273478.1| cytochrome o ubiquinol oxidase subunit III [Pseudo	-7
275		gi|71733460|ref|YP_273491.1| hypothetical protein PSPPH_1225 [Pseudomonas syrin	-7
276		gi|71734158|ref|YP_273493.1| hypothetical protein PSPPH_1227 [Pseudomonas syrin	-7
277		gi|71736520|ref|YP_273494.1| sensory box-containing diguanylate cyclase [Pseudo	-7
278		gi|71738099|ref|YP_273564.1| RNA methyltransferase [Pseudomonas syringae pv. ph	-7
279		gi|71736376|ref|YP_273659.1| purine nucleoside permease [Pseudomonas syringae p	-7
280		gi|71735762|ref|YP_273743.1| GGDEF domain-containing protein [Pseudomonas syrin	-7
281		gi|71734951|ref|YP_273780.1| ISPsy21, transposase orfB [Pseudomonas syringae pv	-7
282		gi|71734439|ref|YP_273805.1| hypothetical protein PSPPH_1553 [Pseudomonas syrin	-7
283		gi|71735627|ref|YP_273834.1| EAL/GGDEF domain-containing protein [Pseudomonas s	-7
284		gi|71734730|ref|YP_273859.1| hypothetical protein PSPPH_1613 [Pseudomonas syrin	-7
285		gi|71733308|ref|YP_273861.1| autoinducer transcriptional regulator AhlR [Pseudo	-7
286		gi|71735401|ref|YP_273956.1| hypothetical protein PSPPH_1719 [Pseudomonas syrin	-7
287		gi|71737576|ref|YP_273960.1| HlyD family secretion protein [Pseudomonas syringa	-7
288		gi|71734908|ref|YP_274014.1| hypothetical protein PSPPH_1780 [Pseudomonas syrin	-7
289		gi|71735743|ref|YP_274023.1| hypothetical protein PSPPH_1789 [Pseudomonas syrin	-7
290		gi|71733344|ref|YP_274086.1| thiamine biosynthesis lipoprotein [Pseudomonas syr	-7
291		gi|71735272|ref|YP_274127.1| glucan biosynthesis protein D [Pseudomonas syringa	-7
292		gi|71736428|ref|YP_274177.1| isopropylmalate isomerase small subunit [Pseudomon	-7
293		gi|71734284|ref|YP_274197.1| hypothetical protein PSPPH_1973 [Pseudomonas syrin	-7
294		gi|71733863|ref|YP_274229.1| hypothetical protein PSPPH_2007 [Pseudomonas syrin	-7
295		gi|71737607|ref|YP_274252.1| deoxyribonuclease TatD [Pseudomonas syringae pv. p	-7
296		gi|71734443|ref|YP_274308.1| hypothetical protein PSPPH_2089 [Pseudomonas syrin	-7
297		gi|71738167|ref|YP_274368.1| hypothetical protein PSPPH_2150 [Pseudomonas syrin	-7
298		gi|71733471|ref|YP_274378.1| flavin reductase domain-containing protein [Pseudo	-7
299		gi|71738035|ref|YP_274405.1| pirin [Pseudomonas syringae pv. phaseolicola 1448A	-7
300		gi|71736759|ref|YP_274438.1| hypothetical protein PSPPH_2227 [Pseudomonas syrin	-7
301		gi|71737763|ref|YP_274573.1| branched-chain amino acid ABC transporter ATP-bind	-7
302		gi|71736750|ref|YP_274574.1| acyl-CoA dehydrogenase family protein [Pseudomonas	-7
303		gi|71734143|ref|YP_274582.1| hypothetical protein PSPPH_2381 [Pseudomonas syrin	-7
304		gi|71733750|ref|YP_274585.1| oxidoreductase truncated [Pseudomonas syringae pv.	-7
305		gi|71733824|ref|YP_274625.1| sigma-54 dependent transcriptional regulator [Pseu	-7
306		gi|71737113|ref|YP_274662.1| glutamine ABC transporter periplasmic amino acid-b	-7
307		gi|71737411|ref|YP_274701.1| aldose 1-epimerase [Pseudomonas syringae pv. phase	-7
308		gi|71735131|ref|YP_274721.1| hypothetical protein PSPPH_2525 [Pseudomonas syrin	-7
309		gi|71735737|ref|YP_274747.1| aldehyde dehydrogenase family protein [Pseudomonas	-7
310		gi|71733351|ref|YP_274766.1| insecticidal toxin complex protein [Pseudomonas sy	-7
311		gi|71734942|ref|YP_274784.1| GAF domain/GGDEF domain/EAL domain-containing prot	-7
312		gi|71735836|ref|YP_274842.1| ABC transporter ATP-binding protein [Pseudomonas s	-7
313		gi|71734355|ref|YP_274878.1| LysR family transcriptional regulator [Pseudomonas	-7
314		gi|71737833|ref|YP_274914.1| glycerone kinase [Pseudomonas syringae pv. phaseol	-7
315		gi|71735267|ref|YP_275045.1| lipoprotein [Pseudomonas syringae pv. phaseolicola	-7
316		gi|71735121|ref|YP_275049.1| hypothetical protein PSPPH_2865 [Pseudomonas syrin	-7
317		gi|71737195|ref|YP_275116.1| carbon-phosphorus lyase complex subunit [Pseudomon	-7
318		gi|71736640|ref|YP_275431.1| hypothetical protein PSPPH_3271 [Pseudomonas syrin	-7
319		gi|71736511|ref|YP_275435.1| ankyrin AnkB [Pseudomonas syringae pv. phaseolicol	-7
320		gi|71734309|ref|YP_275447.1| periplasmic lipoprotein [Pseudomonas syringae pv.	-7
321		gi|71737401|ref|YP_275508.1| hypothetical protein PSPPH_3350 [Pseudomonas syrin	-7
322		gi|71734501|ref|YP_275606.1| BNR/Asp-box repeat-containing protein [Pseudomonas	-7
323		gi|71734741|ref|YP_275630.1| hypothetical protein PSPPH_3476 [Pseudomonas syrin	-7
324		gi|71735400|ref|YP_275696.1| hypothetical protein PSPPH_3548 [Pseudomonas syrin	-7
325		gi|71737858|ref|YP_275821.1| bolA protein [Pseudomonas syringae pv. phaseolicol	-7
326		gi|71735754|ref|YP_275910.1| tolQ protein [Pseudomonas syringae pv. phaseolicol	-7
327		gi|71733453|ref|YP_276071.1| hypothetical protein PSPPH_3935 [Pseudomonas syrin	-7
328		gi|71734721|ref|YP_276078.1| lipoprotein [Pseudomonas syringae pv. phaseolicola	-7
329		gi|71736447|ref|YP_276362.1| outer membrane protein [Pseudomonas syringae pv. p	-7
330		gi|71734081|ref|YP_276431.1| ornithine aminotransferase [Pseudomonas syringae p	-7
331		gi|161611345|ref|YP_276498.2| phosphomethylpyrimidine kinase [Pseudomonas syrin	-7
332		gi|71734557|ref|YP_276551.1| hypothetical protein PSPPH_4435 [Pseudomonas syrin	-7
333		gi|71733347|ref|YP_276564.1| DNA-binding protein Fis [Pseudomonas syringae pv.	-7
334		gi|71735679|ref|YP_276594.1| urease subunit beta [Pseudomonas syringae pv. phas	-7
335		gi|71733540|ref|YP_276773.1| ethanolamine ammonia-lyase small subunit [Pseudomo	-7
336		gi|71737152|ref|YP_276843.1| hypothetical protein PSPPH_4742 [Pseudomonas syrin	-7
337		gi|71735590|ref|YP_276891.1| hypothetical protein PSPPH_4791 [Pseudomonas syrin	-7
338		gi|71733736|ref|YP_276941.1| hypothetical protein PSPPH_4848 [Pseudomonas syrin	-7
339		gi|71733222|ref|YP_277102.1| ribosomal protein S6 modification protein [Pseudom	-7
340		gi|71735468|ref|YP_277136.1| aminotransferase, class V [Pseudomonas syringae pv	-7
341		gi|71734633|ref|YP_277166.1| hypothetical protein PSPPH_5084 [Pseudomonas syrin	-7
342		gi|71736368|ref|YP_277229.1| pyridoxamine kinase [Pseudomonas syringae pv. phas	-7
343		gi|71738060|ref|YP_277281.1| F0F1 ATP synthase subunit gamma [Pseudomonas syrin	-7
344		gi|71734810|ref|YP_277288.1| chromosome partitioning protein ParB [Pseudomonas	-7
345		gi|71725182|ref|YP_272176.1| ISPsy26, transposase orfA [Pseudomonas syringae pv	-7
346		gi|71725239|ref|YP_272192.1| resolvase, truncated [Pseudomonas syringae pv. pha	-7
347		gi|71725246|ref|YP_272199.1| ISPsy21, transposase orfB [Pseudomonas syringae pv	-7
348		gi|71725219|ref|YP_272249.1| transposase family protein [Pseudomonas syringae p	-7
349		gi|71725182|ref|YP_272176.1| ISPsy26, transposase orfA [Pseudomonas syringae pv	-7
350		gi|71725239|ref|YP_272192.1| resolvase, truncated [Pseudomonas syringae pv. pha	-7
351		gi|71725246|ref|YP_272199.1| ISPsy21, transposase orfB [Pseudomonas syringae pv	-7
352		gi|71725219|ref|YP_272249.1| transposase family protein [Pseudomonas syringae p	-7
353		gi|71733707|ref|YP_272410.1| shufflon-specific recombinase [Pseudomonas syringa	-7
354		gi|71736013|ref|YP_272634.1| ubiquinone/menaquinone biosynthesis methyltransfer	-7
355		gi|71736023|ref|YP_272720.1| hypothetical protein PSPPH_0417 [Pseudomonas syrin	-7
356		gi|71737376|ref|YP_272727.1| glycosyl transferase, group 2 family protein [Pseu	-6
357		gi|71737436|ref|YP_273023.1| type IV pilus biogenesis protein [Pseudomonas syri	-6
358		gi|71733599|ref|YP_273213.1| short chain dehydrogenase/reductase family oxidore	-6
359		gi|71736528|ref|YP_273254.1| outer membrane efflux protein [Pseudomonas syringa	-6
360		gi|71734442|ref|YP_273328.1| FKBP-type peptidyl-prolyl cis-trans isomerase [Pse	-6
361		gi|71737764|ref|YP_273939.1| peptidyl-prolyl cis-trans isomerase D [Pseudomonas	-6
362		gi|71736590|ref|YP_274043.1| hypothetical protein PSPPH_1810 [Pseudomonas syrin	-6
363		gi|71737464|ref|YP_274111.1| prophage PSPPH02 chitinase [Pseudomonas syringae p	-6
364		gi|71735557|ref|YP_274356.1| 50S ribosomal protein L35 [Pseudomonas syringae pv	-6
365		gi|71734461|ref|YP_274365.1| hypothetical protein PSPPH_2147 [Pseudomonas syrin	-6
366		gi|71735732|ref|YP_274426.1| TetR family transcriptional regulator [Pseudomonas	-6
367		gi|71734509|ref|YP_274465.1| hypothetical protein PSPPH_2256 [Pseudomonas syrin	-6
368		gi|71736772|ref|YP_274498.1| nickel ABC transporter permease [Pseudomonas syrin	-6
369		gi|71737525|ref|YP_274581.1| outer membrane protein [Pseudomonas syringae pv. p	-6
370		gi|71736240|ref|YP_274593.1| anti-repressor protein [Pseudomonas syringae pv. p	-6
371		gi|71736848|ref|YP_274663.1| PqiB family protein [Pseudomonas syringae pv. phas	-6
372		gi|71737667|ref|YP_274888.1| peptide ABC transporter ATP-binding protein [Pseud	-6
373		gi|71733652|ref|YP_275141.1| formyltetrahydrofolate deformylase [Pseudomonas sy	-6
374		gi|71735772|ref|YP_275240.1| general secretion pathway protein GspE [Pseudomona	-6
375		gi|71734413|ref|YP_275481.1| acetyltransferase [Pseudomonas syringae pv. phaseo	-6
376		gi|71734904|ref|YP_275982.1| hypothetical protein PSPPH_3844 [Pseudomonas syrin	-6
377		gi|71733890|ref|YP_275996.1| hypothetical protein PSPPH_3858 [Pseudomonas syrin	-6
378		gi|71737059|ref|YP_276054.1| hypothetical protein PSPPH_3918 [Pseudomonas syrin	-6
379		gi|71733462|ref|YP_276179.1| hypothetical protein PSPPH_4053 [Pseudomonas syrin	-6
380		gi|71737991|ref|YP_276555.1| TPR domain-containing protein [Pseudomonas syringa	-6
381		gi|71734049|ref|YP_277023.1| lipoprotein [Pseudomonas syringae pv. phaseolicola	-6
382		gi|71737985|ref|YP_277054.1| prophage PSPPH06, major capsid protein P2 family [	-6
383		gi|71733941|ref|YP_277060.1| hypothetical protein PSPPH_4975 [Pseudomonas syrin	-6
384		gi|71736158|ref|YP_277071.1| hypothetical protein PSPPH_4986 [Pseudomonas syrin	-6
385		gi|71736788|ref|YP_277080.1| YngK protein [Pseudomonas syringae pv. phaseolicol	-6
386		gi|71736050|ref|YP_272318.1| recombination protein F [Pseudomonas syringae pv.	-6
387		gi|71733485|ref|YP_272341.1| shikimate 5-dehydrogenase [Pseudomonas syringae pv	-6
388		gi|71737365|ref|YP_272343.1| glycine betaine family ABC transporter substrate-b	-6
389		gi|71733495|ref|YP_272362.1| hexapeptide repeat-containing transferase [Pseudom	-5
390		gi|71733874|ref|YP_272377.1| uroporphyrin-III C-methyltransferase [Pseudomonas	-5
391		gi|71734334|ref|YP_272443.1| hypothetical protein PSPPH_0133 [Pseudomonas syrin	-5
392		gi|71736437|ref|YP_272522.1| phospholipase D family protein [Pseudomonas syring	-5
393		gi|71737052|ref|YP_272532.1| cytochrome c5 [Pseudomonas syringae pv. phaseolico	-5
394		gi|71735852|ref|YP_272542.1| type IV pilus biogenesis protein [Pseudomonas syri	-5
395		gi|71735019|ref|YP_272547.1| N-acetylglutamate synthase [Pseudomonas syringae p	-5
396		gi|71735439|ref|YP_272684.1| ATP-dependent protease ATP-binding subunit HslU [P	-5
397		gi|71735766|ref|YP_272704.1| amidase family protein [Pseudomonas syringae pv. p	-5
398		gi|71735886|ref|YP_272737.1| triphosphoribosyl-dephospho-CoA synthase [Pseudomo	-5
399		gi|71734510|ref|YP_272795.1| potassium/proton antiporter [Pseudomonas syringae	-5
400		gi|71733544|ref|YP_273015.1| FKBP-type peptidyl-prolyl cis-trans isomerase [Pse	-5
401		gi|71733386|ref|YP_273026.1| RND family efflux transporter MFP subunit [Pseudom	-5
402		gi|71736892|ref|YP_273033.1| hypothetical protein PSPPH_0741 [Pseudomonas syrin	-5
403		gi|71733982|ref|YP_273043.1| glycosyl hydrolase family protein [Pseudomonas syr	-5
404		gi|71735089|ref|YP_273044.1| hypothetical protein PSPPH_0757 [Pseudomonas syrin	-5
405		gi|71736321|ref|YP_273120.1| tellurium resistance protein [Pseudomonas syringae	-5
406		gi|71737061|ref|YP_273223.1| glycosyltransferase WbpZ [Pseudomonas syringae pv.	-5
407		gi|71734555|ref|YP_273225.1| GDP-mannose 4,6-dehydratase [Pseudomonas syringae	-5
408		gi|71736274|ref|YP_273360.1| iron(III) dicitrate transport protein fecA [Pseudo	-5
409		gi|71736567|ref|YP_273365.1| AraC family transcriptional regulator [Pseudomonas	-5
410		gi|71737122|ref|YP_273387.1| hypothetical protein PSPPH_1119 [Pseudomonas syrin	-5
411		gi|71734180|ref|YP_273404.1| transcriptional regulatory protein [Pseudomonas sy	-5
412		gi|71733238|ref|YP_273448.1| glucose ABC transporter periplasmic glucose-bindin	-5
413		gi|71736332|ref|YP_273516.1| lipase [Pseudomonas syringae pv. phaseolicola 1448	-5
414		gi|71735748|ref|YP_273602.1| mutT/nudix family protein [Pseudomonas syringae pv	-5
415		gi|71736780|ref|YP_273637.1| cold shock protein CapB [Pseudomonas syringae pv.	-5
416		gi|71737798|ref|YP_273718.1| hypothetical protein PSPPH_1463 [Pseudomonas syrin	-5
417		gi|71736580|ref|YP_273726.1| mismatched base pair and cruciform DNA recognition	-5
418		gi|71736398|ref|YP_273874.1| UDP-N-acetylenolpyruvoylglucosamine reductase [Pse	-5
419		gi|71738088|ref|YP_273900.1| N-(5'-phosphoribosyl)anthranilate isomerase [Pseud	-5
420		gi|71734039|ref|YP_273918.1| glutaminyl-tRNA synthetase [Pseudomonas syringae p	-5
421		gi|71737709|ref|YP_273926.1| ABC transporter periplasmic substrate-binding prot	-5
422		gi|71736233|ref|YP_273932.1| lipoprotein [Pseudomonas syringae pv. phaseolicola	-5
423		gi|71735044|ref|YP_273958.1| enoly-CoA hydratase/isomerase family protein [Pseu	-5
424		gi|71734910|ref|YP_273973.1| glyoxalase family protein family [Pseudomonas syri	-5
425		gi|71735446|ref|YP_273986.1| non-ribosomal peptide synthetase/polyketide synthe	-5
426		gi|71736514|ref|YP_273987.1| TauD/TfdA family dioxygenase [Pseudomonas syringae	-5
427		gi|71735261|ref|YP_274000.1| ureidoglycolate hydrolase [Pseudomonas syringae pv	-5
428		gi|71736742|ref|YP_274067.1| hypothetical protein PSPPH_1835 [Pseudomonas syrin	-5
429		gi|71736322|ref|YP_274089.1| hypothetical protein PSPPH_1858 [Pseudomonas syrin	-5
430		gi|71733896|ref|YP_274131.1| universal stress protein family protein [Pseudomon	-5
431		gi|71737800|ref|YP_274202.1| succinate dehydrogenase flavoprotein subunit [Pseu	-5
432		gi|71737361|ref|YP_274257.1| ABC transporter ATP-binding protein [Pseudomonas s	-5
433		gi|71735290|ref|YP_274279.1| hypothetical protein PSPPH_2060 [Pseudomonas syrin	-5
434		gi|71734083|ref|YP_274363.1| hypothetical protein PSPPH_2145 [Pseudomonas syrin	-5
435		gi|71734645|ref|YP_274366.1| hypothetical protein PSPPH_2148 [Pseudomonas syrin	-5
436		gi|71735879|ref|YP_274372.1| prophage PSPPH03, host specificity protein J, trun	-5
437		gi|71734735|ref|YP_274406.1| LysR family transcriptional regulator [Pseudomonas	-5
438		gi|71735492|ref|YP_274464.1| alkylated DNA repair protein AlkB [Pseudomonas syr	-5
439		gi|71734580|ref|YP_274471.1| sensory box histidine kinase [Pseudomonas syringae	-5
440		gi|71737532|ref|YP_274516.1| insecticidal toxin complex protein [Pseudomonas sy	-5
441		gi|71734672|ref|YP_274521.1| Uvs006 [Pseudomonas syringae pv. phaseolicola 1448	-5
442		gi|71734918|ref|YP_274690.1| hypothetical protein PSPPH_2493 [Pseudomonas syrin	-5
443		gi|71733394|ref|YP_274706.1| hypothetical protein PSPPH_2509 [Pseudomonas syrin	-5
444		gi|71734784|ref|YP_274778.1| hypothetical protein PSPPH_2583 [Pseudomonas syrin	-5
445		gi|71734433|ref|YP_274836.1| short chain dehydrogenase/reductase family oxidore	-5
446		gi|71736542|ref|YP_274899.1| fatty acid desaturase [Pseudomonas syringae pv. ph	-5
447		gi|71735488|ref|YP_274982.1| hypothetical protein PSPPH_2795 [Pseudomonas syrin	-5
448		gi|71737822|ref|YP_275033.1| TonB-dependent receptor [Pseudomonas syringae pv.	-5
449		gi|71737104|ref|YP_275062.1| short chain dehydrogenase/reductase family oxidore	-5
450		gi|71736852|ref|YP_275123.1| signal transduction protein [Pseudomonas syringae	-5
451		gi|71737802|ref|YP_275203.1| N-acylglucosamine 2-epimerase (GlcNAc 2-epimerase)	-5
452		gi|71735397|ref|YP_275248.1| protease inhibitor Inh [Pseudomonas syringae pv. p	-5
453		gi|71737301|ref|YP_275253.1| sulfur transfer complex subunit TusD [Pseudomonas	-5
454		gi|71737615|ref|YP_275280.1| NADH dehydrogenase subunit B [Pseudomonas syringae	-5
455		gi|71734310|ref|YP_275304.1| cysteine desulfurase [Pseudomonas syringae pv. pha	-5
456		gi|71733976|ref|YP_275393.1| LysR family transcriptional regulator [Pseudomonas	-5
457		gi|71736298|ref|YP_275448.1| dyp-type peroxidase family protein [Pseudomonas sy	-5
458		gi|71733773|ref|YP_275455.1| alginate lyase [Pseudomonas syringae pv. phaseolic	-5
459		gi|71737466|ref|YP_275653.1| hypothetical protein PSPPH_3502 [Pseudomonas syrin	-5
460		gi|71734991|ref|YP_275655.1| alginate biosynthesis transcriptional activator [P	-5
461		gi|71733634|ref|YP_275665.1| succinylarginine dihydrolase [Pseudomonas syringae	-5
462		gi|71736476|ref|YP_275694.1| hypothetical protein PSPPH_3546 [Pseudomonas syrin	-5
463		gi|71736545|ref|YP_275756.1| sulfonate ABC transporter permease [Pseudomonas sy	-5
464		gi|71737425|ref|YP_275830.1| hypothetical protein PSPPH_3688 [Pseudomonas syrin	-5
465		gi|71737228|ref|YP_275838.1| adenosylcobinamide kinase/adenosylcobinamide-phosp	-5
466		gi|71734873|ref|YP_275843.1| cobyrinic acid a,c-diamide synthase [Pseudomonas s	-5
467		gi|71735355|ref|YP_275892.1| non-ribosomal peptide synthetase [Pseudomonas syri	-5
468		gi|71736705|ref|YP_275905.1| hypothetical protein PSPPH_3765 [Pseudomonas syrin	-5
469		gi|71734372|ref|YP_275908.1| tolA protein [Pseudomonas syringae pv. phaseolicol	-5
470		gi|71737250|ref|YP_275924.1| lipoprotein [Pseudomonas syringae pv. phaseolicola	-5
471		gi|71733269|ref|YP_275950.1| stationary phase survival protein SurE [Pseudomona	-5
472		gi|71734426|ref|YP_276074.1| hypothetical protein PSPPH_3938 [Pseudomonas syrin	-5
473		gi|71734912|ref|YP_276123.1| LysR family transcriptional regulator [Pseudomonas	-5
474		gi|71735399|ref|YP_276258.1| histidinol-phosphate aminotransferase [Pseudomonas	-5
475		gi|71733223|ref|YP_276332.1| oligoketide cyclase/lipid transport protein [Pseud	-5
476		gi|71736871|ref|YP_276380.1| dipeptide ABC transporter periplasmic dipeptide-bi	-5
477		gi|71735177|ref|YP_276392.1| F-box domain-containing protein [Pseudomonas syrin	-5
478		gi|71734815|ref|YP_276470.1| ATP-dependent RNA helicase rhlE [Pseudomonas syrin	-5
479		gi|71736558|ref|YP_276518.1| D-alanyl-D-alanine carboxypeptidase [Pseudomonas s	-5
480		gi|71736614|ref|YP_276520.1| RlpA family lipoprotein [Pseudomonas syringae pv.	-5
481		gi|71737219|ref|YP_276575.1| precorrin-8X methylmutase [Pseudomonas syringae pv	-5
482		gi|71733355|ref|YP_276602.1| phosphate starvation-inducible protein PsiF [Pseud	-5
483		gi|71736438|ref|YP_276643.1| hypothetical protein PSPPH_4527 [Pseudomonas syrin	-5
484		gi|71735438|ref|YP_276644.1| hypothetical protein PSPPH_4528 [Pseudomonas syrin	-5
485		gi|71735715|ref|YP_276669.1| arginine aminomutase [Pseudomonas syringae pv. pha	-5
486		gi|71734177|ref|YP_276687.1| 50S ribosomal protein L15 [Pseudomonas syringae pv	-5
487		gi|71734326|ref|YP_276723.1| methylmalonate-semialdehyde dehydrogenase [Pseudom	-5
488		gi|71734561|ref|YP_276786.1| hypothetical protein PSPPH_4681 [Pseudomonas syrin	-5
489		gi|71737065|ref|YP_276800.1| Fic family protein [Pseudomonas syringae pv. phase	-5
490		gi|71733390|ref|YP_276901.1| methionine sulfoxide reductase A [Pseudomonas syri	-5
491		gi|71734775|ref|YP_276907.1| electron transfer flavoprotein subunit beta [Pseud	-5
492		gi|71734965|ref|YP_276936.1| MtlE [Pseudomonas syringae pv. phaseolicola 1448A]	-5
493		gi|71733432|ref|YP_276977.1| hypothetical protein PSPPH_4886 [Pseudomonas syrin	-5
494		gi|71735012|ref|YP_277014.1| hypothetical protein PSPPH_4924 [Pseudomonas syrin	-5
495		gi|71736522|ref|YP_277037.1| hypothetical protein PSPPH_4951 [Pseudomonas syrin	-5
496		gi|71737540|ref|YP_277048.1| prophage PSPPH06, DksA/TraR family C4-type zinc fi	-5
497		gi|71735147|ref|YP_277057.1| hypothetical protein PSPPH_4972 [Pseudomonas syrin	-5
498		gi|71737543|ref|YP_277069.1| prophage PSPPH06, site-specific recombinase phage	-5
499		gi|71734595|ref|YP_277081.1| hypothetical protein PSPPH_4996 [Pseudomonas syrin	-5
500		gi|71734936|ref|YP_277083.1| transcriptional regulator [Pseudomonas syringae pv	-5
501		gi|71733846|ref|YP_277131.1| solute-binding family 5 protein [Pseudomonas syrin	-5
502		gi|71734333|ref|YP_277141.1| HAD family hydrolase [Pseudomonas syringae pv. pha	-5
503		gi|71738076|ref|YP_277146.1| hypothetical protein PSPPH_5063 [Pseudomonas syrin	-5
504		gi|71734255|ref|YP_277185.1| lipoprotein [Pseudomonas syringae pv. phaseolicola	-5
505		gi|71734797|ref|YP_277209.1| LysR family transcriptional regulator [Pseudomonas	-5
506		gi|71736143|ref|YP_277247.1| acyltransferase family protein [Pseudomonas syring	-5
507		gi|71734804|ref|YP_277286.1| F0F1 ATP synthase subunit A [Pseudomonas syringae	-5
508		gi|71725178|ref|YP_272133.1| polygalacturonase [Pseudomonas syringae pv. phaseo	-5
509		gi|71725229|ref|YP_272188.1| polygalacturonase [Pseudomonas syringae pv. phaseo	-5
510	HopAW1	gi|71725192|ref|YP_272230.1| type III effector HopAW1 [Pseudomonas syringae pv.	-5
511		gi|71725262|ref|YP_272244.1| stability/partitioning determinant [Pseudomonas sy	-5
512		gi|71725178|ref|YP_272133.1| polygalacturonase [Pseudomonas syringae pv. phaseo	-5
513		gi|71725229|ref|YP_272188.1| polygalacturonase [Pseudomonas syringae pv. phaseo	-5
514		gi|71725192|ref|YP_272230.1| type III effector HopAW1 [Pseudomonas syringae pv.	-5
515		gi|71725262|ref|YP_272244.1| stability/partitioning determinant [Pseudomonas sy	-5
516		gi|71734940|ref|YP_272329.1| hypothetical protein PSPPH_0015 [Pseudomonas syrin	-5
517		gi|71734854|ref|YP_272351.1| transcriptional regulator TrpI [Pseudomonas syring	-5
518		gi|71737405|ref|YP_272561.1| endonuclease/exonuclease/phosphatase family protei	-5
519		gi|71733457|ref|YP_272581.1| radical SAM domain-containing protein [Pseudomonas	-4
520		gi|71734156|ref|YP_272658.1| hypothetical protein PSPPH_0355 [Pseudomonas syrin	-4
521		gi|71733414|ref|YP_273324.1| ompA family protein [Pseudomonas syringae pv. phas	-4
522		gi|71736241|ref|YP_273583.1| aminotransferase [Pseudomonas syringae pv. phaseol	-4
523		gi|71736308|ref|YP_273601.1| hypothetical protein PSPPH_1343 [Pseudomonas syrin	-4
524		gi|71737224|ref|YP_273660.1| nucleoside-specific channel-forming protein [Pseud	-4
525		gi|71736172|ref|YP_273741.1| hypothetical protein PSPPH_1487 [Pseudomonas syrin	-4
526		gi|71734497|ref|YP_273801.1| D-isomer specific 2-hydroxyacid dehydrogenase fami	-4
527		gi|71734789|ref|YP_273802.1| nitroreductase family protein [Pseudomonas syringa	-4
528		gi|71735726|ref|YP_274063.1| transglutaminase-like domain-containing protein [P	-4
529		gi|71737578|ref|YP_274184.1| IclR family transcriptional regulator [Pseudomonas	-4
530		gi|71735654|ref|YP_274433.1| hypothetical protein PSPPH_2222 [Pseudomonas syrin	-4
531		gi|71737201|ref|YP_274454.1| glycogen debranching enzyme GlgX [Pseudomonas syri	-4
532		gi|71735518|ref|YP_274487.1| ABC transporter binding protein-like protein AabH	-4
533		gi|71733826|ref|YP_274712.1| hypothetical protein PSPPH_2516 [Pseudomonas syrin	-4
534		gi|71733914|ref|YP_274839.1| glycogen branching enzyme [Pseudomonas syringae pv	-4
535		gi|71733701|ref|YP_274961.1| cinnamyl-alcohol dehydrogenase-like protein [Pseud	-4
536		gi|71733901|ref|YP_274971.1| GgtA [Pseudomonas syringae pv. phaseolicola 1448A]	-4
537		gi|71736806|ref|YP_275166.1| methyl-accepting chemotaxis protein [Pseudomonas s	-4
538		gi|71737437|ref|YP_275227.1| ATP binding protein [Pseudomonas syringae pv. phas	-4
539		gi|71735832|ref|YP_275298.1| peptidase propeptide/YPEB domain-containing protei	-4
540		gi|71735159|ref|YP_275544.1| flagellar sensor histidine kinase FleS [Pseudomona	-4
541		gi|71736840|ref|YP_275566.1| flagellar basal body rod protein FlgB [Pseudomonas	-4
542		gi|71733228|ref|YP_275568.1| cyanate hydratase [Pseudomonas syringae pv. phaseo	-4
543		gi|71735292|ref|YP_275575.1| hypothetical protein PSPPH_3417 [Pseudomonas syrin	-4
544		gi|71736969|ref|YP_275616.1| L-serine ammonia-lyase [Pseudomonas syringae pv. p	-4
545		gi|71734305|ref|YP_275623.1| glutathione-dependent formaldehyde dehydrogenase [	-4
546		gi|71737163|ref|YP_275638.1| short chain dehydrogenase [Pseudomonas syringae pv	-4
547		gi|71734669|ref|YP_275823.1| fumarate hydratase [Pseudomonas syringae pv. phase	-4
548		gi|71737998|ref|YP_275847.1| NLP/P60 family protein [Pseudomonas syringae pv. p	-4
549		gi|71737908|ref|YP_275929.1| hypothetical protein PSPPH_3791 [Pseudomonas syrin	-4
550		gi|71735802|ref|YP_276109.1| hypothetical protein PSPPH_3974 [Pseudomonas syrin	-4
551		gi|71734055|ref|YP_276127.1| hypothetical protein PSPPH_3995 [Pseudomonas syrin	-4
552		gi|71734026|ref|YP_276174.1| hypothetical protein PSPPH_4048 [Pseudomonas syrin	-4
553		gi|71735541|ref|YP_276249.1| AraC family transcriptional regulator [Pseudomonas	-4
554		gi|71735964|ref|YP_276368.1| D-galactarate dehydratase [Pseudomonas syringae pv	-4
555		gi|71736344|ref|YP_276458.1| oxidoreductase molybdopterin-binding subunit [Pseu	-4
556		gi|71735403|ref|YP_276653.1| single-stranded DNA-binding protein [Pseudomonas s	-4
557		gi|71737175|ref|YP_276681.1| DNA-directed RNA polymerase subunit alpha [Pseudom	-4
558		gi|71736345|ref|YP_276921.1| hypothetical protein PSPPH_4825 [Pseudomonas syrin	-4
559		gi|71734088|ref|YP_277001.1| hypothetical protein PSPPH_4911 [Pseudomonas syrin	-4
560		gi|71733573|ref|YP_277043.1| prophage PSPPH06, TP901 family tail tape measure p	-4
561		gi|71738119|ref|YP_277049.1| prophage PSPPH06 tail tube protein [Pseudomonas sy	-4
562		gi|71736507|ref|YP_277144.1| poly(beta-D-mannuronate) C5 epimerase 3 [Pseudomon	-4
563		gi|71734295|ref|YP_277212.1| L-asparaginase I [Pseudomonas syringae pv. phaseol	-4
564		gi|71725236|ref|YP_272205.1| RelE/ParE family plasmid stabilization system prot	-4
565		gi|71725236|ref|YP_272205.1| RelE/ParE family plasmid stabilization system prot	-4
566		gi|71733904|ref|YP_272331.1| oxidoreductase alpha (molybdopterin) subunit, fusi	-4
567		gi|71737956|ref|YP_272363.1| oligopeptidase A [Pseudomonas syringae pv. phaseol	-4
568		gi|71736461|ref|YP_272424.1| ISPsy19, transposase [Pseudomonas syringae pv. pha	-4
569		gi|71733359|ref|YP_272438.1| lipoprotein [Pseudomonas syringae pv. phaseolicola	-3
570		gi|71734057|ref|YP_272461.1| agmatine deiminase [Pseudomonas syringae pv. phase	-3
571		gi|71734562|ref|YP_272475.1| phage integrase family site specific recombinase [	-3
572		gi|71737978|ref|YP_272477.1| ISPsy19, transposase [Pseudomonas syringae pv. pha	-3
573		gi|71733711|ref|YP_272479.1| acetylornithine deacetylase [Pseudomonas syringae	-3
574		gi|71734514|ref|YP_272481.1| ISPsy2, transposase, truncated [Pseudomonas syring	-3
575		gi|71737610|ref|YP_272482.1| ISPsy19, transposase [Pseudomonas syringae pv. pha	-3
576		gi|71735760|ref|YP_272498.1| TonB system transport protein ExbB1 [Pseudomonas s	-3
577		gi|71734813|ref|YP_272501.1| endoribonuclease L-PSP [Pseudomonas syringae pv. p	-3
578		gi|71733999|ref|YP_272576.1| Sco1/SenC family protein [Pseudomonas syringae pv.	-3
579		gi|71735311|ref|YP_272586.1| exopolyphosphatase [Pseudomonas syringae pv. phase	-3
580		gi|71737673|ref|YP_272614.1| hypothetical protein PSPPH_0311 [Pseudomonas syrin	-3
581		gi|71735107|ref|YP_272636.1| D-methionine ABC transporter ATP-binding protein [	-3
582		gi|71737270|ref|YP_272645.1| cystine transporter subunit [Pseudomonas syringae	-3
583		gi|71736448|ref|YP_272670.1| twin arginine translocase protein A [Pseudomonas s	-3
584		gi|71737380|ref|YP_272677.1| polyhydroxyalkanoate granule-associated protein Ph	-3
585		gi|71736453|ref|YP_272679.1| transcriptional regulator PhaD [Pseudomonas syring	-3
586		gi|71736706|ref|YP_272721.1| FAD-binding protein [Pseudomonas syringae pv. phas	-3
587		gi|71735669|ref|YP_272733.1| hypothetical protein PSPPH_0430 [Pseudomonas syrin	-3
588		gi|71737759|ref|YP_272738.1| malonate decarboxylase subunit delta [Pseudomonas	-3
589		gi|71734398|ref|YP_272740.1| malonate decarboxylase subunit gamma [Pseudomonas	-3
590		gi|71734235|ref|YP_272838.1| hydroxymethylpyrimidine transporter CytX [Pseudomo	-3
591		gi|71737102|ref|YP_272846.1| DNA topoisomerase IV subunit B [Pseudomonas syring	-3
592		gi|71733327|ref|YP_272864.1| N-acetylmuramoyl-L-alanine amidase [Pseudomonas sy	-3
593		gi|71736842|ref|YP_272882.1| hypothetical protein PSPPH_0582 [Pseudomonas syrin	-3
594		gi|71734210|ref|YP_272906.1| ISPsy19, transposase [Pseudomonas syringae pv. pha	-3
595		gi|71734756|ref|YP_272991.1| PAAR motif-containing protein [Pseudomonas syringa	-3
596		gi|71737188|ref|YP_273020.1| hypothetical protein PSPPH_0728 [Pseudomonas syrin	-3
597		gi|71736859|ref|YP_273049.1| hypothetical protein PSPPH_0762 [Pseudomonas syrin	-3
598		gi|71734551|ref|YP_273050.1| type III helper protein HopAJ1 [Pseudomonas syring	-3
599		gi|71734010|ref|YP_273055.1| ISPsy19, transposase [Pseudomonas syringae pv. pha	-3
600		gi|71736575|ref|YP_273061.1| ISPsy19, transposase [Pseudomonas syringae pv. pha	-3
601		gi|71737455|ref|YP_273064.1| OMP85 family outer membrane protein [Pseudomonas s	-3
602		gi|71734111|ref|YP_273088.1| STAS domain-containing protein [Pseudomonas syring	-3
603		gi|71737069|ref|YP_273090.1| methyl-accepting chemotaxis protein [Pseudomonas s	-3
604		gi|71736628|ref|YP_273103.1| type IV pilin [Pseudomonas syringae pv. phaseolico	-3
605		gi|71735002|ref|YP_273111.1| hypothetical protein PSPPH_0830 [Pseudomonas syrin	-3
606		gi|71738176|ref|YP_273117.1| tellurium resistance protein TerC [Pseudomonas syr	-3
607		gi|71733787|ref|YP_273127.1| DNA-binding transcriptional regulator FruR [Pseudo	-3
608		gi|71734573|ref|YP_273134.1| pantoate--beta-alanine ligase [Pseudomonas syringa	-3
609		gi|71733402|ref|YP_273137.1| poly(A) polymerase [Pseudomonas syringae pv. phase	-3
610		gi|71733833|ref|YP_273145.1| Rieske 2Fe-2S family protein [Pseudomonas syringae	-3
611		gi|71733376|ref|YP_273154.1| acetolactate synthase 3 regulatory subunit [Pseudo	-3
612		gi|71736312|ref|YP_273174.1| ISPsy19, transposase [Pseudomonas syringae pv. pha	-3
613		gi|71735647|ref|YP_273192.1| ISPsy19, transposase [Pseudomonas syringae pv. pha	-3
614		gi|71737973|ref|YP_273246.1| transcriptional activator RfaH [Pseudomonas syring	-3
615		gi|71737506|ref|YP_273278.1| hypothetical protein PSPPH_1007 [Pseudomonas syrin	-3
616		gi|71737257|ref|YP_273311.1| hypothetical protein PSPPH_1040 [Pseudomonas syrin	-3
617		gi|71733374|ref|YP_273357.1| lipoprotein [Pseudomonas syringae pv. phaseolicola	-3
618		gi|71735334|ref|YP_273424.1| leucyl aminopeptidase [Pseudomonas syringae pv. ph	-3
619		gi|71735034|ref|YP_273471.1| hypothetical protein PSPPH_1205 [Pseudomonas syrin	-3
620		gi|71737298|ref|YP_273512.1| hypothetical protein PSPPH_1250 [Pseudomonas syrin	-3
621		gi|71734151|ref|YP_273518.1| transketolase, N-terminal subunit [Pseudomonas syr	-3
622	HrpZ1	gi|71734736|ref|YP_273532.1| type III helper protein HrpZ1 [Pseudomonas syringa	-3
623		gi|71737322|ref|YP_273536.1| type III secretion component protein HrpE [Pseudom	-3
624		gi|71737846|ref|YP_273578.1| 4-hydroxy-3-methylbut-2-en-1-yl diphosphate syntha	-3
625		gi|71738105|ref|YP_273611.1| signal recognition particle protein [Pseudomonas s	-3
626		gi|71737965|ref|YP_273629.1| ISPsy19, transposase [Pseudomonas syringae pv. pha	-3
627		gi|71735815|ref|YP_273687.1| hypothetical protein PSPPH_1431 [Pseudomonas syrin	-3
628		gi|71733331|ref|YP_273703.1| hypothetical protein PSPPH_1448 [Pseudomonas syrin	-3
629		gi|71735644|ref|YP_273714.1| OMP85 family outer membrane protein [Pseudomonas s	-3
630		gi|71735523|ref|YP_273744.1| ISPsy19, transposase [Pseudomonas syringae pv. pha	-3
631		gi|71736606|ref|YP_273800.1| hypothetical protein PSPPH_1548 [Pseudomonas syrin	-3
632		gi|71734694|ref|YP_273819.1| acyltransferase family protein [Pseudomonas syring	-3
633		gi|71733696|ref|YP_273822.1| hypothetical protein PSPPH_1574 [Pseudomonas syrin	-3
634		gi|71737099|ref|YP_273828.1| hypothetical protein PSPPH_1580 [Pseudomonas syrin	-3
635		gi|71733270|ref|YP_273846.1| ISPsy19, transposase [Pseudomonas syringae pv. pha	-3
636		gi|71734954|ref|YP_273875.1| ribonuclease, Rne/Rng family protein [Pseudomonas	-3
637		gi|71736487|ref|YP_273897.1| aspartate-semialdehyde dehydrogenase [Pseudomonas	-3
638		gi|71736491|ref|YP_273928.1| hypothetical protein PSPPH_1691 [Pseudomonas syrin	-3
639		gi|71734663|ref|YP_273929.1| hypothetical protein PSPPH_1692 [Pseudomonas syrin	-3
640		gi|71736812|ref|YP_273968.1| hypothetical protein PSPPH_1732 [Pseudomonas syrin	-3
641		gi|71737652|ref|YP_273970.1| ISPsy19, transposase [Pseudomonas syringae pv. pha	-3
642		gi|71733959|ref|YP_273989.1| hypothetical protein PSPPH_1754 [Pseudomonas syrin	-3
643		gi|71738082|ref|YP_273998.1| hypothetical protein PSPPH_1763 [Pseudomonas syrin	-3
644		gi|71737396|ref|YP_274033.1| benzoate transport protein [Pseudomonas syringae p	-3
645		gi|71735724|ref|YP_274066.1| enoyl-CoA hydratase [Pseudomonas syringae pv. phas	-3
646		gi|71736032|ref|YP_274075.1| hypothetical protein PSPPH_1843 [Pseudomonas syrin	-3
647		gi|71733346|ref|YP_274100.1| transaldolase B [Pseudomonas syringae pv. phaseoli	-3
648		gi|71738132|ref|YP_274108.1| ISPsy19, transposase [Pseudomonas syringae pv. pha	-3
649		gi|71736067|ref|YP_274140.1| diaminobutyrate--2-oxoglutarate aminotransferase [	-3
650		gi|71735414|ref|YP_274166.1| hypothetical protein PSPPH_1938 [Pseudomonas syrin	-3
651		gi|71734612|ref|YP_274173.1| HSP20 family protein [Pseudomonas syringae pv. pha	-3
652		gi|71737680|ref|YP_274189.1| electron transfer flavoprotein subunit alpha [Pseu	-3
653		gi|71736659|ref|YP_274228.1| ISPsy19, transposase [Pseudomonas syringae pv. pha	-3
654		gi|71733317|ref|YP_274231.1| fimbrial protein [Pseudomonas syringae pv. phaseol	-3
655		gi|71734601|ref|YP_274233.1| chaperone protein PapD [Pseudomonas syringae pv. p	-3
656		gi|71737137|ref|YP_274240.1| potassium-transporting ATPase subunit B [Pseudomon	-3
657		gi|71737901|ref|YP_274267.1| transcriptional regulator CysB [Pseudomonas syring	-3
658		gi|71733860|ref|YP_274277.1| aconitate hydratase [Pseudomonas syringae pv. phas	-3
659		gi|71736714|ref|YP_274287.1| OprF [Pseudomonas syringae pv. phaseolicola 1448A]	-3
660		gi|71733883|ref|YP_274291.1| serine/threonine protein kinase [Pseudomonas syrin	-3
661		gi|71738101|ref|YP_274293.1| levansucrase (beta-D-fructofuranosyl transferase)(	-3
662		gi|71735520|ref|YP_274296.1| dihydroorotate dehydrogenase 2 [Pseudomonas syring	-3
663		gi|71737488|ref|YP_274315.1| protocatechuate 3,4-dioxygenase subunit beta [Pseu	-3
664		gi|71734522|ref|YP_274382.1| hypothetical protein PSPPH_2165 [Pseudomonas syrin	-3
665		gi|71736923|ref|YP_274411.1| metalloprotease [Pseudomonas syringae pv. phaseoli	-3
666		gi|71736052|ref|YP_274439.1| hypothetical protein PSPPH_2228 [Pseudomonas syrin	-3
667		gi|71733709|ref|YP_274446.1| 3-oxoadipate enol-lactonase [Pseudomonas syringae	-3
668		gi|71737661|ref|YP_274448.1| azoreductase [Pseudomonas syringae pv. phaseolicol	-3
669		gi|71736077|ref|YP_274460.1| acetyltransferase [Pseudomonas syringae pv. phaseo	-3
670		gi|71737688|ref|YP_274468.1| lipoprotein [Pseudomonas syringae pv. phaseolicola	-3
671		gi|71733255|ref|YP_274495.1| ISPsy19, transposase truncated [Pseudomonas syring	-3
672		gi|71738171|ref|YP_274496.1| ISPsy19, transposase truncated [Pseudomonas syring	-3
673		gi|71734641|ref|YP_274509.1| histidine transporter, periplasmic histidine-bindi	-3
674		gi|71737573|ref|YP_274513.1| ISPsy19, transposase [Pseudomonas syringae pv. pha	-3
675		gi|71735265|ref|YP_274520.1| GntR family transcriptional regulator [Pseudomonas	-3
676		gi|71735708|ref|YP_274525.1| peptide ABC transporter ATP-binding protein [Pseud	-3
677		gi|71733648|ref|YP_274560.1| hypothetical protein PSPPH_2359 [Pseudomonas syrin	-3
678		gi|71736356|ref|YP_274578.1| sensor histidine kinase BaeS [Pseudomonas syringae	-3
679		gi|71737939|ref|YP_274594.1| prophage PSPPH04 tail fiber domain-containing prot	-3
680		gi|71734404|ref|YP_274633.1| feruloyl-CoA synthase [Pseudomonas syringae pv. ph	-3
681		gi|71736273|ref|YP_274635.1| hypothetical protein PSPPH_2437 [Pseudomonas syrin	-3
682		gi|71734468|ref|YP_274681.1| ISPsy19, transposase [Pseudomonas syringae pv. pha	-3
683		gi|71737730|ref|YP_274727.1| ISPsy19, transposase [Pseudomonas syringae pv. pha	-3
684		gi|71737770|ref|YP_274736.1| hypothetical protein PSPPH_2540 [Pseudomonas syrin	-3
685		gi|71735525|ref|YP_274763.1| ISPsy19, transposase [Pseudomonas syringae pv. pha	-3
686		gi|71733369|ref|YP_274849.1| ISPsy19, transposase [Pseudomonas syringae pv. pha	-3
687		gi|71734626|ref|YP_274860.1| hypothetical protein PSPPH_2670 [Pseudomonas syrin	-3
688		gi|71736349|ref|YP_274875.1| polysaccharide deacetylase family protein [Pseudom	-3
689		gi|71737738|ref|YP_274877.1| proline/betaine transporter [Pseudomonas syringae	-3
690		gi|71733666|ref|YP_274890.1| hypothetical protein PSPPH_2700 [Pseudomonas syrin	-3
691		gi|71733898|ref|YP_274918.1| ribose ABC transporter ATP-binding protein [Pseudo	-3
692		gi|71735281|ref|YP_274919.1| ISPsy19, transposase [Pseudomonas syringae pv. pha	-3
693		gi|71734938|ref|YP_274930.1| hypothetical protein PSPPH_2741 [Pseudomonas syrin	-3
694		gi|71733720|ref|YP_275002.1| ISPsy19, transposase [Pseudomonas syringae pv. pha	-3
695		gi|71734770|ref|YP_275044.1| hypothetical protein PSPPH_2860 [Pseudomonas syrin	-3
696		gi|71736242|ref|YP_275046.1| AraC family transcriptional regulator [Pseudomonas	-3
697		gi|71733695|ref|YP_275071.1| ferric siderophore transporter, periplasmic energy	-3
698		gi|71735977|ref|YP_275086.1| salicylate biosynthesis isochorismate synthase [Ps	-3
699		gi|71735254|ref|YP_275091.1| luciferase family protein [Pseudomonas syringae pv	-3
700		gi|71733988|ref|YP_275120.1| phosphonate ABC transporter periplasmic phosphonat	-3
701		gi|71733911|ref|YP_275205.1| glycerate kinase 2 [Pseudomonas syringae pv. phase	-3
702		gi|71734153|ref|YP_275209.1| GntR family transcriptional regulator [Pseudomonas	-3
703		gi|71737342|ref|YP_275277.1| type II and III secretion system family protein [P	-3
704		gi|71735077|ref|YP_275291.1| NADH dehydrogenase subunit N [Pseudomonas syringae	-3
705		gi|71735887|ref|YP_275383.1| mannose-1-phosphate guanylyltransferase/mannose-6-	-3
706		gi|71733202|ref|YP_275452.1| hypothetical protein PSPPH_3293 [Pseudomonas syrin	-3
707		gi|71735361|ref|YP_275464.1| lipoprotein [Pseudomonas syringae pv. phaseolicola	-3
708		gi|71737527|ref|YP_275467.1| thiol:disulfide interchange protein DsbE [Pseudomo	-3
709		gi|71733972|ref|YP_275486.1| aerotaxis receptor Aer [Pseudomonas syringae pv. p	-3
710		gi|71734681|ref|YP_275512.1| chemotaxis protein CheW [Pseudomonas syringae pv.	-3
711		gi|71737319|ref|YP_275531.1| flagellar motor switch protein FliM [Pseudomonas s	-3
712	extracellular flagellum component	gi|71737292|ref|YP_275548.1| flagellar hook-associated protein FliD [Pseudomona	-3
713		gi|71734525|ref|YP_275595.1| BNR/Asp-box repeat-containing protein [Pseudomonas	-3
714		gi|71736141|ref|YP_275612.1| piperideine-6-carboxylate dehydrogenase [Pseudomon	-3
715		gi|71734016|ref|YP_275617.1| amino acid transporter LysE [Pseudomonas syringae	-3
716		gi|71735479|ref|YP_275642.1| glutathione S-transferase family protein [Pseudomo	-3
717		gi|71737159|ref|YP_275671.1| histidine ABC transporter ATP-binding protein [Pse	-3
718		gi|71736543|ref|YP_275701.1| EmrB/QacA family drug resistance transporter [Pseu	-3
719		gi|71736650|ref|YP_275720.1| hypothetical protein PSPPH_3572 [Pseudomonas syrin	-3
720		gi|71736119|ref|YP_275722.1| sugar transporter [Pseudomonas syringae pv. phaseo	-3
721		gi|71734178|ref|YP_275730.1| ISPsy19, transposase [Pseudomonas syringae pv. pha	-3
722		gi|71733196|ref|YP_275737.1| lipoprotein [Pseudomonas syringae pv. phaseolicola	-3
723		gi|71735747|ref|YP_275739.1| hypothetical protein PSPPH_3591 [Pseudomonas syrin	-3
724		gi|71735615|ref|YP_275744.1| hypothetical protein PSPPH_3596 [Pseudomonas syrin	-3
725		gi|71737233|ref|YP_275746.1| rhomboid family protein [Pseudomonas syringae pv.	-3
726		gi|71735233|ref|YP_275750.1| hypothetical protein PSPPH_3602 [Pseudomonas syrin	-3
727		gi|71733836|ref|YP_275767.1| hypothetical protein PSPPH_3620 [Pseudomonas syrin	-3
728		gi|71737279|ref|YP_275770.1| hypothetical protein PSPPH_3627 [Pseudomonas syrin	-3
729		gi|71734463|ref|YP_275781.1| ISPsy19, transposase truncated [Pseudomonas syring	-3
730		gi|71735954|ref|YP_275789.1| lipase [Pseudomonas syringae pv. phaseolicola 1448	-3
731		gi|71738020|ref|YP_275817.1| sensory box protein [Pseudomonas syringae pv. phas	-3
732		gi|71736116|ref|YP_275877.1| ferric iron reductase protein FhuF [Pseudomonas sy	-3
733		gi|71736047|ref|YP_275889.1| ISPsy19, transposase [Pseudomonas syringae pv. pha	-3
734		gi|71734651|ref|YP_275891.1| MupB [Pseudomonas syringae pv. phaseolicola 1448A]	-3
735		gi|71736091|ref|YP_275923.1| prolyl-tRNA synthetase [Pseudomonas syringae pv. p	-3
736		gi|71733821|ref|YP_275991.1| glycerol-3-phosphate acyltransferase [Pseudomonas	-3
737		gi|71737838|ref|YP_275994.1| hypothetical protein PSPPH_3856 [Pseudomonas syrin	-3
738		gi|71736469|ref|YP_276009.1| hypothetical protein PSPPH_3871 [Pseudomonas syrin	-3
739		gi|71736444|ref|YP_276020.1| hypothetical protein PSPPH_3883 [Pseudomonas syrin	-3
740		gi|71735917|ref|YP_276021.1| ISPsy19, transposase [Pseudomonas syringae pv. pha	-3
741		gi|71733971|ref|YP_276049.1| D-alanyl-alanine synthetase A [Pseudomonas syringa	-3
742		gi|71733763|ref|YP_276056.1| hypothetical protein PSPPH_3920 [Pseudomonas syrin	-3
743		gi|71737308|ref|YP_276060.1| iron utilization protein [Pseudomonas syringae pv.	-3
744		gi|71738169|ref|YP_276083.1| GTP-binding protein Era [Pseudomonas syringae pv.	-3
745		gi|71733724|ref|YP_276088.1| protease Do [Pseudomonas syringae pv. phaseolicola	-3
746		gi|71733808|ref|YP_276138.1| hypothetical protein PSPPH_4008 [Pseudomonas syrin	-3
747		gi|71737595|ref|YP_276170.1| insecticidal toxin protein [Pseudomonas syringae p	-3
748		gi|71737387|ref|YP_276178.1| beta-lactamase [Pseudomonas syringae pv. phaseolic	-3
749		gi|71737817|ref|YP_276186.1| hypothetical protein PSPPH_4060 [Pseudomonas syrin	-3
750		gi|71734159|ref|YP_276198.1| inaA protein [Pseudomonas syringae pv. phaseolicol	-3
751		gi|71735888|ref|YP_276238.1| S-adenosyl-methyltransferase MraW [Pseudomonas syr	-3
752		gi|71733362|ref|YP_276260.1| ATP phosphoribosyltransferase catalytic subunit [P	-3
753		gi|71737700|ref|YP_276281.1| ISPsy19, transposase [Pseudomonas syringae pv. pha	-3
754		gi|71736850|ref|YP_276297.1| aspartyl/glutamyl-tRNA amidotransferase subunit B	-3
755		gi|71734958|ref|YP_276348.1| catalase/peroxidase HPI [Pseudomonas syringae pv.	-3
756		gi|71736942|ref|YP_276393.1| ISPsy19, transposase [Pseudomonas syringae pv. pha	-3
757		gi|71737720|ref|YP_276403.1| ISPsy19, transposase [Pseudomonas syringae pv. pha	-3
758		gi|71736801|ref|YP_276407.1| hypothetical protein PSPPH_4289 [Pseudomonas syrin	-3
759		gi|71737489|ref|YP_276434.1| hypothetical protein PSPPH_4316 [Pseudomonas syrin	-3
760		gi|71733336|ref|YP_276447.1| carbon starvation protein CstA [Pseudomonas syring	-3
761		gi|71735761|ref|YP_276483.1| endoribonuclease L-PSP family protein [Pseudomonas	-3
762		gi|71737085|ref|YP_276556.1| hypothetical protein PSPPH_4440 [Pseudomonas syrin	-3
763		gi|71734136|ref|YP_276558.1| 3-dehydroquinate dehydratase [Pseudomonas syringae	-3
764		gi|71735800|ref|YP_276578.1| cobalt-precorrin-6A synthase [Pseudomonas syringae	-3
765		gi|71734479|ref|YP_276607.1| hypothetical protein PSPPH_4491 [Pseudomonas syrin	-3
766		gi|71738087|ref|YP_276609.1| bacterioferritin [Pseudomonas syringae pv. phaseol	-3
767		gi|71734028|ref|YP_276634.1| OmpW family outer membrane protein [Pseudomonas sy	-3
768		gi|71735095|ref|YP_276638.1| arylesterase [Pseudomonas syringae pv. phaseolicol	-3
769		gi|71734598|ref|YP_276641.1| hypothetical protein PSPPH_4525 [Pseudomonas syrin	-3
770		gi|71734640|ref|YP_276656.1| hypothetical protein PSPPH_4541 [Pseudomonas syrin	-3
771		gi|71736756|ref|YP_276700.1| 30S ribosomal protein S3 [Pseudomonas syringae pv.	-3
772		gi|71735820|ref|YP_276730.1| ABC transporter permease [Pseudomonas syringae pv.	-3
773		gi|71735988|ref|YP_276790.1| ISPsy19, transposase [Pseudomonas syringae pv. pha	-3
774		gi|71735183|ref|YP_276791.1| ATP/GTP-binding protein [Pseudomonas syringae pv.	-3
775		gi|71736475|ref|YP_276794.1| amino acid transporter LysE [Pseudomonas syringae	-3
776		gi|71737663|ref|YP_276810.1| pyrroloquinoline quinone biosynthesis protein PqqE	-3
777		gi|71733408|ref|YP_276856.1| glutathione-independent formaldehyde dehydrogenase	-3
778		gi|71736043|ref|YP_276868.1| transcriptional regulator BetI [Pseudomonas syring	-3
779		gi|71736424|ref|YP_276881.1| signal recognition particle-docking protein FtsY [	-3
780		gi|71736414|ref|YP_276894.1| protease PfpI [Pseudomonas syringae pv. phaseolico	-3
781		gi|71734473|ref|YP_276899.1| EmrB/QacA family drug resistance transporter [Pseu	-3
782		gi|71735645|ref|YP_276908.1| electron transfer flavoprotein subunit alpha [Pseu	-3
783		gi|71734144|ref|YP_276955.1| histidine ABC transporter permease [Pseudomonas sy	-3
784		gi|71733361|ref|YP_276957.1| histidine ammonia-lyase [Pseudomonas syringae pv.	-3
785		gi|71734820|ref|YP_276997.1| OprD family outer membrane porin [Pseudomonas syri	-3
786		gi|71737350|ref|YP_277000.1| taurine ABC transporter permease [Pseudomonas syri	-3
787		gi|71737884|ref|YP_277020.1| A/G-specific adenine glycosylase [Pseudomonas syri	-3
788		gi|71733640|ref|YP_277074.1| ISPsy19, transposase truncated [Pseudomonas syring	-3
789		gi|71736881|ref|YP_277097.1| nucleoside diphosphate kinase regulator [Pseudomon	-3
790		gi|71736613|ref|YP_277121.1| acetylornithine deacetylase [Pseudomonas syringae	-3
791		gi|71733257|ref|YP_277132.1| TonB system transport protein [Pseudomonas syringa	-3
792		gi|71736595|ref|YP_277169.1| GntR family transcriptional regulator [Pseudomonas	-3
793		gi|71735561|ref|YP_277203.1| aldose 1-epimerase family protein [Pseudomonas syr	-3
794		gi|71735476|ref|YP_277210.1| aspartate ammonia-lyase [Pseudomonas syringae pv.	-3
795		gi|71735778|ref|YP_277260.1| TonB-dependent receptor [Pseudomonas syringae pv.	-3
796		gi|71736994|ref|YP_277262.1| iron compound ABC transporter iron compound-bindin	-3
797		gi|71737940|ref|YP_277270.1| LacI family transcription regulator [Pseudomonas s	-3
798		gi|71736196|ref|YP_277277.1| DeoR family transcriptional regulator [Pseudomonas	-3
799		gi|71725215|ref|YP_272168.1| plasmid partition protein ParB, truncated [Pseudom	-3
800		gi|71725218|ref|YP_272180.1| outer-membrane fimbrial usher protein [Pseudomonas	-3
801		gi|71725145|ref|YP_272184.1| ISPsy19, transposase [Pseudomonas syringae pv. pha	-3
802		gi|71725204|ref|YP_272195.1| ISPsy19, transposase [Pseudomonas syringae pv. pha	-3
803		gi|71725267|ref|YP_272201.1| hypothetical protein PSPPH_A0091 [Pseudomonas syri	-3
804		gi|71725249|ref|YP_272210.1| ISPsy19, transposase [Pseudomonas syringae pv. pha	-3
805		gi|71725210|ref|YP_272222.1| phosphoglycerate mutase family protein [Pseudomona	-3
806		gi|71725187|ref|YP_272223.1| syringolide biosynthetic protein AvrD1 [Pseudomona	-3
807		gi|71725231|ref|YP_272231.1| hypothetical protein PSPPH_A0123 [Pseudomonas syri	-3
808		gi|71725228|ref|YP_272245.1| stability/partitioning determinant, putative [Pseu	-3
809		gi|71725215|ref|YP_272168.1| plasmid partition protein ParB, truncated [Pseudom	-3
810		gi|71725218|ref|YP_272180.1| outer-membrane fimbrial usher protein [Pseudomonas	-3
811		gi|71725145|ref|YP_272184.1| ISPsy19, transposase [Pseudomonas syringae pv. pha	-3
812		gi|71725204|ref|YP_272195.1| ISPsy19, transposase [Pseudomonas syringae pv. pha	-3
813		gi|71725267|ref|YP_272201.1| hypothetical protein PSPPH_A0091 [Pseudomonas syri	-3
814		gi|71725249|ref|YP_272210.1| ISPsy19, transposase [Pseudomonas syringae pv. pha	-3
815		gi|71725210|ref|YP_272222.1| phosphoglycerate mutase family protein [Pseudomona	-3
816		gi|71725187|ref|YP_272223.1| syringolide biosynthetic protein AvrD1 [Pseudomona	-3
817		gi|71725231|ref|YP_272231.1| hypothetical protein PSPPH_A0123 [Pseudomonas syri	-3
818		gi|71725228|ref|YP_272245.1| stability/partitioning determinant, putative [Pseu	-3
819		gi|71737743|ref|YP_272383.1| argininosuccinate lyase [Pseudomonas syringae pv.	-3
820		gi|71735974|ref|YP_272392.1| ATP-dependent DNA helicase Rep [Pseudomonas syring	-3
821		gi|71734691|ref|YP_272650.1| pH-dependent sodium/proton antiporter [Pseudomonas	-3
822		gi|71736456|ref|YP_272794.1| potassium efflux protein KefA [Pseudomonas syringa	-2
823		gi|71735422|ref|YP_272940.1| sensory box histidine kinase [Pseudomonas syringae	-2
824		gi|71734191|ref|YP_273066.1| RulB [Pseudomonas syringae pv. phaseolicola 1448A]	-2
825		gi|71735749|ref|YP_273189.1| TonB-dependent receptor [Pseudomonas syringae pv.	-2
826		gi|71734317|ref|YP_273224.1| NAD dependent epimerase/dehydratase family protein	-2
827		gi|71735978|ref|YP_273261.1| peptidyl-tRNA hydrolase [Pseudomonas syringae pv.	-2
828		gi|71736527|ref|YP_273267.1| glutamyl-tRNA reductase [Pseudomonas syringae pv.	-2
829		gi|71733522|ref|YP_273316.1| endoribonuclease L-PSP family protein [Pseudomonas	-2
830		gi|71733639|ref|YP_273415.1| hypothetical protein PSPPH_1148 [Pseudomonas syrin	-2
831		gi|71734053|ref|YP_273442.1| RNA polymerase sigma-70 family protein [Pseudomona	-2
832		gi|71734972|ref|YP_273625.1| YaeQ family protein [Pseudomonas syringae pv. phas	-2
833		gi|71733891|ref|YP_273641.1| amino acid ABC transporter ATP-binding protein [Ps	-2
834		gi|71737402|ref|YP_273651.1| ATP-dependent hsl protease ATP-binding subunit hsl	-2
835		gi|71734131|ref|YP_273673.1| high-affinity branched-chain amino acid ABC transp	-2
836		gi|71733800|ref|YP_273971.1| TonB-dependent siderophore receptor [Pseudomonas s	-2
837		gi|71736385|ref|YP_274006.1| guanine deaminase [Pseudomonas syringae pv. phaseo	-2
838		gi|71737902|ref|YP_274049.1| 2,3-diketo-5-methylthio-1-phosphopentane phosphata	-2
839		gi|71737812|ref|YP_274101.1| outer membrane ferripyoverdine receptor [Pseudomon	-2
840		gi|71737617|ref|YP_274170.1| glutamyl-tRNA synthetase [Pseudomonas syringae pv.	-2
841		gi|71734922|ref|YP_274302.1| sensor histidine kinase/response regulator [Pseudo	-2
842		gi|71734939|ref|YP_274332.1| glycosyl transferase, group 2 family protein [Pseu	-2
843		gi|71735704|ref|YP_274430.1| AsnC family transcriptional regulator [Pseudomonas	-2
844		gi|71736490|ref|YP_274714.1| hypothetical protein PSPPH_2518 [Pseudomonas syrin	-2
845		gi|71735024|ref|YP_274825.1| exonuclease III [Pseudomonas syringae pv. phaseoli	-2
846		gi|71735160|ref|YP_274843.1| lipopolysaccharide core biosynthesis domain-contai	-2
847		gi|71733807|ref|YP_274892.1| Ser/Thr protein phosphatase family protein [Pseudo	-2
848		gi|71737123|ref|YP_274942.1| YhcA [Pseudomonas syringae pv. phaseolicola 1448A]	-2
849		gi|71735328|ref|YP_275017.1| ABC transporter ATP-binding protein [Pseudomonas s	-2
850		gi|71733530|ref|YP_275053.1| manganese transport protein MntH [Pseudomonas syri	-2
851		gi|71735701|ref|YP_275190.1| acetyltransferase [Pseudomonas syringae pv. phaseo	-2
852		gi|71736267|ref|YP_275250.1| LysR family transcriptional regulator [Pseudomonas	-2
853		gi|71735882|ref|YP_275281.1| bifunctional NADH:ubiquinone oxidoreductase subuni	-2
854		gi|71737210|ref|YP_275300.1| 6-pyruvoyl tetrahydrobiopterin synthase [Pseudomon	-2
855		gi|71734925|ref|YP_275556.1| flagellar rod assembly protein/muramidase FlgJ [Ps	-2
856		gi|71736849|ref|YP_275558.1| flagellar basal body L-ring protein [Pseudomonas s	-2
857		gi|71735105|ref|YP_275569.1| DNA-binding transcriptional regulator CynR [Pseudo	-2
858		gi|71736777|ref|YP_275599.1| hypothetical protein PSPPH_3443 [Pseudomonas syrin	-2
859		gi|71733848|ref|YP_275691.1| phosphotransferase domain-containing protein [Pseu	-2
860		gi|71736392|ref|YP_275790.1| elongation factor P [Pseudomonas syringae pv. phas	-2
861		gi|71734359|ref|YP_276168.1| hypothetical protein PSPPH_4040 [Pseudomonas syrin	-2
862		gi|71736696|ref|YP_276426.1| deoxycytidine triphosphate deaminase [Pseudomonas	-2
863		gi|71735620|ref|YP_276528.1| hypothetical protein PSPPH_4412 [Pseudomonas syrin	-2
864		gi|71735243|ref|YP_276629.1| hypothetical protein PSPPH_4513 [Pseudomonas syrin	-2
865		gi|71734370|ref|YP_276845.1| AraC family transcriptional regulator [Pseudomonas	-2
866		gi|71734192|ref|YP_277108.1| hypothetical protein PSPPH_5023 [Pseudomonas syrin	-2
867		gi|71737403|ref|YP_277111.1| hypothetical protein PSPPH_5026 [Pseudomonas syrin	-2
868		gi|71737665|ref|YP_277112.1| acetyltransferase [Pseudomonas syringae pv. phaseo	-2
869		gi|71735699|ref|YP_277201.1| major facilitator superfamily protein [Pseudomonas	-2
870		gi|71725243|ref|YP_272214.1| hypothetical protein PSPPH_A0104 [Pseudomonas syri	-2
871		gi|71725160|ref|YP_272226.1| ISPsy16, transposase, truncated [Pseudomonas syrin	-2
872		gi|71725243|ref|YP_272214.1| hypothetical protein PSPPH_A0104 [Pseudomonas syri	-2
873		gi|71725160|ref|YP_272226.1| ISPsy16, transposase, truncated [Pseudomonas syrin	-2
874		gi|71735230|ref|YP_272359.1| ISPsy18, transposase [Pseudomonas syringae pv. pha	-2
875		gi|71737073|ref|YP_272378.1| uroporphyrinogen-III synthase [Pseudomonas syringa	-2
876		gi|71735375|ref|YP_272411.1| recombinase [Pseudomonas syringae pv. phaseolicola	-2
877		gi|71733859|ref|YP_272415.1| type I restriction-modification system restriction	-1
878		gi|71736251|ref|YP_272442.1| hypothetical protein PSPPH_0132 [Pseudomonas syrin	-1
879		gi|71734476|ref|YP_272449.1| formate dehydrogenase family accessory protein Fdh	-1
880		gi|71735179|ref|YP_272480.1| hypothetical protein PSPPH_0174 [Pseudomonas syrin	-1
881		gi|71737194|ref|YP_272544.1| AsnC family transcriptional regulator [Pseudomonas	-1
882		gi|71736746|ref|YP_272563.1| ribosome biogenesis GTP-binding protein YsxC [Pseu	-1
883		gi|71736296|ref|YP_272615.1| sigma-54-binding protein [Pseudomonas syringae pv.	-1
884		gi|71734328|ref|YP_272628.1| hypothetical protein PSPPH_0325 [Pseudomonas syrin	-1
885		gi|71737727|ref|YP_272660.1| proline iminopeptidase [Pseudomonas syringae pv. p	-1
886		gi|71736818|ref|YP_272680.1| poly(3-hydroxyalkanoate) polymerase [Pseudomonas s	-1
887		gi|71736283|ref|YP_272690.1| nuclease-like protein [Pseudomonas syringae pv. ph	-1
888		gi|71733761|ref|YP_272707.1| uroporphyrinogen decarboxylase [Pseudomonas syring	-1
889		gi|71735565|ref|YP_272718.1| 3-oxoacyl-(acyl carrier protein) synthase I [Pseud	-1
890		gi|71737070|ref|YP_272779.1| hypothetical protein PSPPH_0476 [Pseudomonas syrin	-1
891		gi|71737942|ref|YP_272799.1| sodium/proline symporter [Pseudomonas syringae pv.	-1
892		gi|71734717|ref|YP_272808.1| ATP-dependent RNA helicase DbpA [Pseudomonas syrin	-1
893		gi|71735630|ref|YP_272837.1| thiamine biosynthesis protein ThiC [Pseudomonas sy	-1
894		gi|71737938|ref|YP_272844.1| Ser/Thr protein phosphatase [Pseudomonas syringae	-1
895		gi|71736229|ref|YP_272856.1| flagellar motor protein MotA [Pseudomonas syringae	-1
896		gi|71738097|ref|YP_272886.1| azurin [Pseudomonas syringae pv. phaseolicola 1448	-1
897		gi|71735838|ref|YP_272888.1| nicotinate phosphoribosyltransferase [Pseudomonas	-1
898		gi|71736150|ref|YP_272919.1| DNA primase [Pseudomonas syringae pv. phaseolicola	-1
899		gi|71737951|ref|YP_272946.1| ribulose-phosphate 3-epimerase [Pseudomonas syring	-1
900		gi|71735719|ref|YP_272964.1| hypothetical protein PSPPH_0666 [Pseudomonas syrin	-1
901		gi|71735004|ref|YP_272994.1| gamma-glutamyltranspeptidase [Pseudomonas syringae	-1
902		gi|71737768|ref|YP_273013.1| isoleucyl-tRNA synthetase [Pseudomonas syringae pv	-1
903		gi|71735126|ref|YP_273019.1| pre-pilin leader sequence [Pseudomonas syringae pv	-1
904		gi|71736917|ref|YP_273024.1| glycine oxidase ThiO [Pseudomonas syringae pv. pha	-1
905		gi|71738001|ref|YP_273035.1| hypothetical protein PSPPH_0747 [Pseudomonas syrin	-1
906	HopAT1	gi|76008346|ref|YP_325661.1| type III effector HopAT1 [Pseudomonas syringae pv.	-1
907		gi|71737106|ref|YP_273065.1| hemagglutination activity domain-containing protei	-1
908		gi|71734515|ref|YP_273069.1| ISPsy19, transposase [Pseudomonas syringae pv. pha	-1
909		gi|71734211|ref|YP_273094.1| outer membrane efflux protein [Pseudomonas syringa	-1
910		gi|71733253|ref|YP_273105.1| hypothetical protein PSPPH_0823 [Pseudomonas syrin	-1
911		gi|71737125|ref|YP_273124.1| N-acetyl-anhydromuranmyl-L-alanine amidase [Pseudo	-1
912		gi|71733614|ref|YP_273132.1| hypothetical protein PSPPH_0851 [Pseudomonas syrin	-1
913		gi|71736778|ref|YP_273149.1| penicillin-binding protein 1B [Pseudomonas syringa	-1
914		gi|71736379|ref|YP_273220.1| hypothetical protein PSPPH_0947 [Pseudomonas syrin	-1
915		gi|71733423|ref|YP_273221.1| DnaJ domain-containing protein [Pseudomonas syring	-1
916		gi|71735434|ref|YP_273239.1| glucose-1-phosphate thymidylyltransferase [Pseudom	-1
917		gi|71737481|ref|YP_273243.1| hypothetical protein PSPPH_0971 [Pseudomonas syrin	-1
918		gi|71737556|ref|YP_273256.1| mannose-1-phosphate guanylyltransferase/mannose-6-	-1
919		gi|71734538|ref|YP_273297.1| hypothetical protein PSPPH_1026 [Pseudomonas syrin	-1
920		gi|71737182|ref|YP_273312.1| hypothetical protein PSPPH_1041 [Pseudomonas syrin	-1
921		gi|71736186|ref|YP_273321.1| ABC transporter ATP-binding protein [Pseudomonas s	-1
922		gi|71734752|ref|YP_273359.1| ribosomal subunit interface protein [Pseudomonas s	-1
923		gi|71734577|ref|YP_273368.1| LysR family transcriptional regulator [Pseudomonas	-1
924		gi|71736083|ref|YP_273381.1| alginate biosynthesis protein AlgG [Pseudomonas sy	-1
925		gi|71736446|ref|YP_273406.1| GIY-YIG nuclease superfamily protein [Pseudomonas	-1
926		gi|71734921|ref|YP_273429.1| glycine dehydrogenase [Pseudomonas syringae pv. ph	-1
927		gi|71734257|ref|YP_273431.1| hypothetical protein PSPPH_1164 [Pseudomonas syrin	-1
928		gi|71737271|ref|YP_273439.1| heme oxygenase [Pseudomonas syringae pv. phaseolic	-1
929		gi|71736863|ref|YP_273465.1| hypothetical protein PSPPH_1198 [Pseudomonas syrin	-1
930		gi|71737383|ref|YP_273468.1| Outer membrane usher protein fimD [Pseudomonas syr	-1
931		gi|71737143|ref|YP_273485.1| hypothetical protein PSPPH_1219 [Pseudomonas syrin	-1
932		gi|71733950|ref|YP_273598.1| transglycosylase [Pseudomonas syringae pv. phaseol	-1
933		gi|71737903|ref|YP_273639.1| hypothetical protein PSPPH_1382 [Pseudomonas syrin	-1
934		gi|71733796|ref|YP_273643.1| amino acid ABC transporter permease [Pseudomonas s	-1
935		gi|71733852|ref|YP_273691.1| LysR family transcriptional regulator [Pseudomonas	-1
936		gi|71734836|ref|YP_273745.1| major facilitator family transporter [Pseudomonas	-1
937		gi|71737857|ref|YP_273777.1| serine protease [Pseudomonas syringae pv. phaseoli	-1
938		gi|71736315|ref|YP_273818.1| sensory box histidine kinase/response regulator [P	-1
939		gi|71735072|ref|YP_273839.1| polyamine ABC transporter permease [Pseudomonas sy	-1
940		gi|71738173|ref|YP_273855.1| Rieske (2Fe-2S) domain-containing protein [Pseudom	-1
941		gi|71735840|ref|YP_273893.1| amino acid transporter LysE [Pseudomonas syringae	-1
942		gi|71736025|ref|YP_273920.1| sigma-54 dependent transcriptional regulator [Pseu	-1
943		gi|71734352|ref|YP_273923.1| ABC transporter permease [Pseudomonas syringae pv.	-1
944		gi|71734782|ref|YP_273931.1| hypothetical protein PSPPH_1694 [Pseudomonas syrin	-1
945		gi|71735514|ref|YP_273934.1| trigger factor [Pseudomonas syringae pv. phaseolic	-1
946		gi|71733685|ref|YP_273935.1| ATP-dependent Clp protease proteolytic subunit [Ps	-1
947		gi|71734674|ref|YP_274001.1| allantoicase [Pseudomonas syringae pv. phaseolicol	-1
948		gi|71734488|ref|YP_274009.1| xanthine dehydrogenase [Pseudomonas syringae pv. p	-1
949		gi|71734630|ref|YP_274025.1| hypothetical protein PSPPH_1791 [Pseudomonas syrin	-1
950		gi|71733266|ref|YP_274046.1| transporter [Pseudomonas syringae pv. phaseolicola	-1
951		gi|71736248|ref|YP_274048.1| acireductone dioxygenase family protein [Pseudomon	-1
952		gi|71734863|ref|YP_274093.1| 7-cyano-7-deazaguanine reductase [Pseudomonas syri	-1
953		gi|71735348|ref|YP_274102.1| glutamate carboxypeptidase [Pseudomonas syringae p	-1
954		gi|71734605|ref|YP_274103.1| ultraviolet light resistance protein RulA [Pseudom	-1
955		gi|71734637|ref|YP_274114.1| hypothetical protein PSPPH_1886 [Pseudomonas syrin	-1
956		gi|71736634|ref|YP_274126.1| tRNA-dihydrouridine synthase A [Pseudomonas syring	-1
957		gi|71736230|ref|YP_274161.1| Tat pathway signal sequence domain-containing prot	-1
958		gi|71737570|ref|YP_274193.1| GntR family transcriptional regulator [Pseudomonas	-1
959		gi|71734647|ref|YP_274212.1| dienelactone hydrolase family protein [Pseudomonas	-1
960		gi|71735116|ref|YP_274213.1| 3-oxoacyl-(acyl carrier protein) synthase I [Pseud	-1
961		gi|71734349|ref|YP_274218.1| phosphohistidine phosphatase SixA [Pseudomonas syr	-1
962		gi|71735975|ref|YP_274220.1| hypothetical protein PSPPH_1998 [Pseudomonas syrin	-1
963		gi|71736216|ref|YP_274241.1| potassium-transporting ATPase subunit C [Pseudomon	-1
964		gi|71735276|ref|YP_274244.1| lipoprotein [Pseudomonas syringae pv. phaseolicola	-1
965		gi|71735477|ref|YP_274254.1| hypothetical protein PSPPH_2035 [Pseudomonas syrin	-1
966		gi|71733623|ref|YP_274261.1| outer membrane lipoprotein OprI [Pseudomonas syrin	-1
967		gi|71735771|ref|YP_274305.1| chitinase class I family protein [Pseudomonas syri	-1
968		gi|71738072|ref|YP_274316.1| protocatechuate 3,4-dioxygenase subunit alpha [Pse	-1
969		gi|71733771|ref|YP_274321.1| hypothetical protein PSPPH_2102 [Pseudomonas syrin	-1
970		gi|71737653|ref|YP_274327.1| RNA pseudouridine synthase family protein [Pseudom	-1
971		gi|71735585|ref|YP_274353.1| hypothetical protein PSPPH_2134 [Pseudomonas syrin	-1
972		gi|71736381|ref|YP_274384.1| luciferase family protein [Pseudomonas syringae pv	-1
973		gi|71735614|ref|YP_274395.1| general secretion pathway protein GspD [Pseudomona	-1
974		gi|71734214|ref|YP_274440.1| sigma-54 dependent transcriptional regulator [Pseu	-1
975		gi|71736903|ref|YP_274461.1| hypothetical protein PSPPH_2250 [Pseudomonas syrin	-1
976		gi|71735198|ref|YP_274477.1| hypothetical protein PSPPH_2268 [Pseudomonas syrin	-1
977		gi|71737925|ref|YP_274502.1| FAD/FMN-binding oxidoreductase [Pseudomonas syring	-1
978		gi|71735381|ref|YP_274503.1| hypothetical protein PSPPH_2297 [Pseudomonas syrin	-1
979		gi|71737899|ref|YP_274551.1| amine oxidase, flavin-containing [Pseudomonas syri	-1
980		gi|71735449|ref|YP_274579.1| multidrug resistance protein [Pseudomonas syringae	-1
981		gi|71734095|ref|YP_274591.1| hypothetical protein PSPPH_2391 [Pseudomonas syrin	-1
982		gi|71736323|ref|YP_274596.1| prophage PSPPH04 lysozyme [Pseudomonas syringae pv	-1
983		gi|71735559|ref|YP_274611.1| methionyl-tRNA synthetase [Pseudomonas syringae pv	-1
984		gi|71737523|ref|YP_274628.1| hypothetical protein PSPPH_2429 [Pseudomonas syrin	-1
985		gi|71736126|ref|YP_274644.1| allophanate hydrolase subunit 1 [Pseudomonas syrin	-1
986		gi|71737103|ref|YP_274649.1| multidrug transporter [Pseudomonas syringae pv. ph	-1
987		gi|71737934|ref|YP_274661.1| glutamine ABC transporter ATP-binding protein [Pse	-1
988		gi|71736597|ref|YP_274673.1| LysR family transcriptional regulator [Pseudomonas	-1
989		gi|71736787|ref|YP_274675.1| DNA-binding protein [Pseudomonas syringae pv. phas	-1
990		gi|71734108|ref|YP_274684.1| TauD/TfdA family dioxygenase [Pseudomonas syringae	-1
991		gi|71733326|ref|YP_274707.1| sensor histidine kinase [Pseudomonas syringae pv.	-1
992		gi|71737623|ref|YP_274713.1| hypothetical protein PSPPH_2517 [Pseudomonas syrin	-1
993		gi|71733526|ref|YP_274725.1| type III secretion component [Pseudomonas syringae	-1
994		gi|71736985|ref|YP_274733.1| type III secretion component [Pseudomonas syringae	-1
995		gi|71736880|ref|YP_274768.1| D-alanyl-D-alanine endopeptidase [Pseudomonas syri	-1
996		gi|71736503|ref|YP_274781.1| aldo-keto reductase family protein [Pseudomonas sy	-1
997		gi|71735460|ref|YP_274808.1| phosphoglycerate mutase family protein [Pseudomona	-1
998		gi|71733229|ref|YP_274816.1| yhgI protein [Pseudomonas syringae pv. phaseolicol	-1
999		gi|71736269|ref|YP_274819.1| 3-methylcrotonyl-CoA carboxylase subunit beta [Pse	-1
1000		gi|71735589|ref|YP_274826.1| acetyltransferase [Pseudomonas syringae pv. phaseo	-1
1001		gi|71735528|ref|YP_274880.1| FAD-binding oxidoreductase [Pseudomonas syringae p	-1
1002		gi|71733780|ref|YP_274883.1| LysR family transcriptional regulator [Pseudomonas	-1
1003		gi|71737779|ref|YP_274891.1| alkylhydroperoxidase [Pseudomonas syringae pv. pha	-1
1004		gi|71737574|ref|YP_274962.1| AraC family transcriptional regulator [Pseudomonas	-1
1005		gi|71734500|ref|YP_274978.1| prophage PSPPH05, helix-destabilizing protein [Pse	-1
1006		gi|71737275|ref|YP_274979.1| hypothetical protein PSPPH_2791 [Pseudomonas syrin	-1
1007		gi|71736246|ref|YP_274990.1| glycosyl transferase ArnC [Pseudomonas syringae pv	-1
1008		gi|71735989|ref|YP_275013.1| hypothetical protein PSPPH_2828 [Pseudomonas syrin	-1
1009		gi|71733210|ref|YP_275060.1| hypothetical protein PSPPH_2877 [Pseudomonas syrin	-1
1010		gi|71733794|ref|YP_275101.1| carbonic anhydrase [Pseudomonas syringae pv. phase	-1
1011		gi|71737793|ref|YP_275112.1| phosphonate metabolism protein PhnL [Pseudomonas s	-1
1012		gi|71736505|ref|YP_275144.1| sarcosine oxidase subunit delta family protein [Ps	-1
1013		gi|71736006|ref|YP_275145.1| sarcosine oxidase subunit alpha family protein [Ps	-1
1014		gi|71733316|ref|YP_275156.1| aliphatic sulfonate ABC transporter periplasmic su	-1
1015		gi|71736959|ref|YP_275159.1| regulatory protein [Pseudomonas syringae pv. phase	-1
1016		gi|71734971|ref|YP_275164.1| transcriptional regulator, GntR family/aminotransf	-1
1017		gi|71736819|ref|YP_275183.1| oligogalacturonate-specific porin protein KdgM [Ps	-1
1018		gi|71737255|ref|YP_275184.1| GntR family transcriptional regulator [Pseudomonas	-1
1019		gi|71734666|ref|YP_275200.1| nucleoside 2-deoxyribosyltransferase [Pseudomonas	-1
1020		gi|71733585|ref|YP_275220.1| RND family efflux transporter MFP subunit [Pseudom	-1
1021		gi|71737217|ref|YP_275244.1| aldehyde dehydrogenase family protein [Pseudomonas	-1
1022		gi|71735262|ref|YP_275268.1| ATP-dependent Clp protease adaptor protein ClpS [P	-1
1023		gi|71736907|ref|YP_275308.1| low molecular weight protein-tyrosine-phosphatase	-1
1024		gi|71737391|ref|YP_275314.1| mannosyltransferase [Pseudomonas syringae pv. phas	-1
1025		gi|71736272|ref|YP_275319.1| LysR family transcriptional regulator [Pseudomonas	-1
1026		gi|71734832|ref|YP_275329.1| KU domain-containing protein [Pseudomonas syringae	-1
1027		gi|71735780|ref|YP_275331.1| sigma-54 dependent transcriptional regulator [Pseu	-1
1028		gi|71736183|ref|YP_275333.1| DNA-binding protein [Pseudomonas syringae pv. phas	-1
1029		gi|71735774|ref|YP_275388.1| group 1 glycosyl transferase family protein [Pseud	-1
1030		gi|71737407|ref|YP_275402.1| cyanate transport protein [Pseudomonas syringae pv	-1
1031		gi|71733562|ref|YP_275420.1| carbon storage regulator [Pseudomonas syringae pv.	-1
1032		gi|71735226|ref|YP_275422.1| hypothetical protein PSPPH_3262 [Pseudomonas syrin	-1
1033		gi|71734945|ref|YP_275434.1| catalase KatB [Pseudomonas syringae pv. phaseolico	-1
1034		gi|71737805|ref|YP_275456.1| MarR family transcriptional regulator [Pseudomonas	-1
1035		gi|71735092|ref|YP_275461.1| ribosomal protein alanine acetyltransferase [Pseud	-1
1036		gi|71734911|ref|YP_275495.1| cbb3-type cytochrome c oxidase subunit I [Pseudomo	-1
1037		gi|71737752|ref|YP_275581.1| 3-oxoacyl-(acyl-carrier-protein) synthase III [Pse	-1
1038		gi|71734152|ref|YP_275583.1| gluconate 5-dehydrogenase [Pseudomonas syringae pv	-1
1039		gi|71737334|ref|YP_275589.1| transcriptional regulator PobR [Pseudomonas syring	-1
1040		gi|71734318|ref|YP_275614.1| hypothetical protein PSPPH_3459 [Pseudomonas syrin	-1
1041		gi|71736621|ref|YP_275637.1| zinc-binding dehydrogenase family oxidoreductase [	-1
1042		gi|71733372|ref|YP_275709.1| hypothetical protein PSPPH_3561 [Pseudomonas syrin	-1
1043		gi|71735801|ref|YP_275731.1| hypothetical protein PSPPH_3583 [Pseudomonas syrin	-1
1044		gi|71737180|ref|YP_275734.1| BNR/Asp-box repeat-containing protein [Pseudomonas	-1
1045		gi|71737541|ref|YP_275735.1| hypothetical protein PSPPH_3587 [Pseudomonas syrin	-1
1046		gi|71737259|ref|YP_275776.1| extradiol-type ring-opening dioxygenase [Pseudomon	-1
1047		gi|71734200|ref|YP_275777.1| DEAD-box ATP dependent DNA helicase [Pseudomonas s	-1
1048		gi|71737760|ref|YP_275857.1| nucleoside triphosphate pyrophosphohydrolase [Pseu	-1
1049		gi|71734708|ref|YP_275880.1| ribonucleotide-diphosphate reductase subunit alpha	-1
1050		gi|71737598|ref|YP_275917.1| hypothetical protein PSPPH_3777 [Pseudomonas syrin	-1
1051		gi|71735625|ref|YP_275926.1| hypothetical protein PSPPH_3788 [Pseudomonas syrin	-1
1052		gi|71737811|ref|YP_275933.1| hypothetical protein PSPPH_3795 [Pseudomonas syrin	-1
1053		gi|71735714|ref|YP_275934.1| hypothetical protein PSPPH_3796 [Pseudomonas syrin	-1
1054		gi|71734579|ref|YP_275936.1| LysR family transcriptional regulator [Pseudomonas	-1
1055		gi|71734019|ref|YP_275939.1| hypothetical protein PSPPH_3801 [Pseudomonas syrin	-1
1056		gi|71738021|ref|YP_275945.1| DNA mismatch repair protein MutS [Pseudomonas syri	-1
1057		gi|71735091|ref|YP_275953.1| esterase [Pseudomonas syringae pv. phaseolicola 14	-1
1058		gi|71733271|ref|YP_275990.1| hypothetical protein PSPPH_3852 [Pseudomonas syrin	-1
1059		gi|71734361|ref|YP_275995.1| hypothetical protein PSPPH_3857 [Pseudomonas syrin	-1
1060		gi|71737676|ref|YP_276022.1| hypothetical protein PSPPH_3885 [Pseudomonas syrin	-1
1061		gi|71738056|ref|YP_276036.1| glycerol kinase [Pseudomonas syringae pv. phaseoli	-1
1062		gi|71735297|ref|YP_276077.1| ATP-dependent protease La [Pseudomonas syringae pv	-1
1063		gi|71733871|ref|YP_276079.1| methyltransferase [Pseudomonas syringae pv. phaseo	-1
1064		gi|71733313|ref|YP_276089.1| alginate regulatory protein MucB [Pseudomonas syri	-1
1065		gi|71737262|ref|YP_276114.1| hypothetical protein PSPPH_3979 [Pseudomonas syrin	-1
1066		gi|71734184|ref|YP_276130.1| hypothetical protein PSPPH_3999 [Pseudomonas syrin	-1
1067		gi|71733307|ref|YP_276139.1| hypothetical protein PSPPH_4009 [Pseudomonas syrin	-1
1068		gi|71735956|ref|YP_276143.1| RND family efflux transporter MFP subunit [Pseudom	-1
1069		gi|71737472|ref|YP_276150.1| Pca regulon regulatory protein PcaR [Pseudomonas s	-1
1070		gi|71734585|ref|YP_276194.1| lipoprotein [Pseudomonas syringae pv. phaseolicola	-1
1071		gi|71735069|ref|YP_276221.1| bifunctional ornithine acetyltransferase/N-acetylg	-1
1072		gi|71737283|ref|YP_276226.1| cell division protein FtsA [Pseudomonas syringae p	-1
1073		gi|71736600|ref|YP_276237.1| cell division protein FtsL [Pseudomonas syringae p	-1
1074		gi|71735680|ref|YP_276241.1| lipoprotein [Pseudomonas syringae pv. phaseolicola	-1
1075		gi|71735922|ref|YP_276255.1| sulfate adenylyltransferase subunit 2 [Pseudomonas	-1
1076		gi|71734068|ref|YP_276261.1| UDP-N-acetylglucosamine 1-carboxyvinyltransferase	-1
1077		gi|71733918|ref|YP_276262.1| toluene tolerance protein Ttg2F [Pseudomonas syrin	-1
1078		gi|71733518|ref|YP_276282.1| fumarate hydratase [Pseudomonas syringae pv. phase	-1
1079		gi|71737931|ref|YP_276295.1| aspartyl/glutamyl-tRNA amidotransferase subunit C	-1
1080		gi|71734190|ref|YP_276314.1| preprotein translocase subunit SecG [Pseudomonas s	-1
1081		gi|71734802|ref|YP_276319.1| ribosomal RNA large subunit methyltransferase J [P	-1
1082		gi|71737780|ref|YP_276326.1| molecular chaperone DnaK [Pseudomonas syringae pv.	-1
1083		gi|71736618|ref|YP_276353.1| peptide ABC transporter ATP-binding protein [Pseud	-1
1084		gi|71736210|ref|YP_276356.1| LuxR family transcriptional regulator [Pseudomonas	-1
1085		gi|71737048|ref|YP_276364.1| acetyltransferase [Pseudomonas syringae pv. phaseo	-1
1086		gi|71734123|ref|YP_276371.1| GntR family transcriptional regulator [Pseudomonas	-1
1087		gi|71735306|ref|YP_276410.1| transcription elongation factor GreB [Pseudomonas	-1
1088		gi|71737735|ref|YP_276490.1| hypothetical protein PSPPH_4374 [Pseudomonas syrin	-1
1089		gi|71734858|ref|YP_276500.1| glutamate-1-semialdehyde aminotransferase [Pseudom	-1
1090		gi|71734236|ref|YP_276506.1| metal ion transporter [Pseudomonas syringae pv. ph	-1
1091		gi|71737093|ref|YP_276519.1| hypothetical protein PSPPH_4403 [Pseudomonas syrin	-1
1092		gi|71737987|ref|YP_276541.1| Rhs element Vgr protein [Pseudomonas syringae pv.	-1
1093		gi|71737039|ref|YP_276549.1| CpaB family Flp pilus assembly protein [Pseudomona	-1
1094		gi|71737766|ref|YP_276566.1| phosphoribosylamine--glycine ligase [Pseudomonas s	-1
1095		gi|71735841|ref|YP_276568.1| MarC membrane protein [Pseudomonas syringae pv. ph	-1
1096		gi|71734952|ref|YP_276598.1| curved-DNA-binding protein [Pseudomonas syringae p	-1
1097		gi|71736142|ref|YP_276625.1| lipoprotein [Pseudomonas syringae pv. phaseolicola	-1
1098		gi|71735797|ref|YP_276646.1| glycerol-3-phosphate ABC transporter periplasmic g	-1
1099		gi|71733419|ref|YP_276684.1| 30S ribosomal protein S13 [Pseudomonas syringae pv	-1
1100		gi|71736944|ref|YP_276698.1| 50S ribosomal protein L29 [Pseudomonas syringae pv	-1
1101		gi|71736278|ref|YP_276748.1| copper-translocating P-type ATPase [Pseudomonas sy	-1
1102		gi|71733260|ref|YP_276749.1| Cu(I)-responsive transcriptional regulator [Pseudo	-1
1103		gi|71734650|ref|YP_276751.1| AraC family transcriptional regulator [Pseudomonas	-1
1104		gi|71735707|ref|YP_276755.1| acetyl-CoA acetyltransferase [Pseudomonas syringae	-1
1105		gi|71736429|ref|YP_276770.1| UDP-N-acetylmuramate:L-alanyl-gamma-D-glutamyl-mes	-1
1106		gi|71737845|ref|YP_276811.1| prolyl oligopeptidase family protein [Pseudomonas	-1
1107		gi|71735745|ref|YP_276819.1| biotin biosynthesis protein BioC [Pseudomonas syri	-1
1108		gi|71733678|ref|YP_276865.1| RNA polymerase sigma factor [Pseudomonas syringae	-1
1109		gi|71735810|ref|YP_276926.1| cation efflux family protein [Pseudomonas syringae	-1
1110		gi|71733303|ref|YP_276946.1| nitrogen regulation protein NR(I) [Pseudomonas syr	-1
1111		gi|71737732|ref|YP_276947.1| aldo/keto reductase family oxidoreductase [Pseudom	-1
1112		gi|71733536|ref|YP_277003.1| preprotein translocase subunit SecB [Pseudomonas s	-1
1113		gi|71736001|ref|YP_277007.1| M24/M37 family peptidase [Pseudomonas syringae pv.	-1
1114		gi|71734374|ref|YP_277058.1| prophage PSPPH06, site-specific recombinase phage	-1
1115		gi|71733506|ref|YP_277085.1| nitrogen regulatory protein P-II [Pseudomonas syri	-1
1116		gi|71736302|ref|YP_277106.1| Hsp33-like chaperonin [Pseudomonas syringae pv. ph	-1
1117		gi|71734344|ref|YP_277110.1| hypothetical protein PSPPH_5025 [Pseudomonas syrin	-1
1118		gi|71738166|ref|YP_277133.1| biopolymer transport protein ExbD [Pseudomonas syr	-1
1119		gi|71733197|ref|YP_277148.1| hypothetical protein PSPPH_5065 [Pseudomonas syrin	-1
1120		gi|71736048|ref|YP_277168.1| aldo/keto reductase family oxidoreductase [Pseudom	-1
1121		gi|71734125|ref|YP_277179.1| hypothetical protein PSPPH_5102 [Pseudomonas syrin	-1
1122		gi|71736517|ref|YP_277182.1| hypothetical protein PSPPH_5105 [Pseudomonas syrin	-1
1123		gi|71735467|ref|YP_277196.1| phosphate transport system regulatory protein PhoU	-1
1124		gi|71735837|ref|YP_277230.1| hypothetical protein PSPPH_5153 [Pseudomonas syrin	-1
1125		gi|71735020|ref|YP_277232.1| hypothetical protein PSPPH_5155 [Pseudomonas syrin	-1
1126		gi|71733996|ref|YP_277257.1| hypothetical protein PSPPH_5180 [Pseudomonas syrin	-1
1127		gi|71725180|ref|YP_272146.1| hypothetical protein PSPPH_A0022 [Pseudomonas syri	-1
1128		gi|71725157|ref|YP_272149.1| hypothetical protein PSPPH_A0026 [Pseudomonas syri	-1
1129		gi|71725183|ref|YP_272157.1| PilT domain-containing protein [Pseudomonas syring	-1
1130		gi|71725196|ref|YP_272171.1| hypothetical protein PSPPH_A0052 [Pseudomonas syri	-1
1131		gi|71725197|ref|YP_272204.1| prevent-host-death family protein [Pseudomonas syr	-1
1132		gi|71725169|ref|YP_272248.1| hypothetical protein PSPPH_A0142 [Pseudomonas syri	-1
1133		gi|71725180|ref|YP_272146.1| hypothetical protein PSPPH_A0022 [Pseudomonas syri	-1
1134		gi|71725157|ref|YP_272149.1| hypothetical protein PSPPH_A0026 [Pseudomonas syri	-1
1135		gi|71725183|ref|YP_272157.1| PilT domain-containing protein [Pseudomonas syring	-1
1136		gi|71725196|ref|YP_272171.1| hypothetical protein PSPPH_A0052 [Pseudomonas syri	-1
1137		gi|71725197|ref|YP_272204.1| prevent-host-death family protein [Pseudomonas syr	-1
1138		gi|71725169|ref|YP_272248.1| hypothetical protein PSPPH_A0142 [Pseudomonas syri	-1
1139		gi|71738172|ref|YP_272372.1| FKBP-type peptidyl-prolyl cis-trans isomerase [Pse	-1
1140		gi|71733907|ref|YP_272436.1| hypothetical protein PSPPH_0126 [Pseudomonas syrin	-1
1141		gi|71736516|ref|YP_272439.1| ATP-dependent Clp protease ATP-binding subunit [Ps	-1
1142		gi|71737214|ref|YP_272462.1| hypothetical protein PSPPH_0154 [Pseudomonas syrin	0
1143		gi|71734097|ref|YP_272492.1| hypothetical protein PSPPH_0187 [Pseudomonas syrin	0
1144		gi|71735490|ref|YP_272556.1| osmotically inducible protein [Pseudomonas syringa	0
1145		gi|71733974|ref|YP_272580.1| carbonic anhydrase [Pseudomonas syringae pv. phase	0
1146		gi|71736127|ref|YP_272587.1| amino acid ABC transporter ATP-binding protein [Ps	0
1147		gi|71737882|ref|YP_272613.1| major facilitator superfamily transporter phthalat	0
1148		gi|71733370|ref|YP_272697.1| type IV pilus biogenesis protein PilQ [Pseudomonas	0
1149		gi|71737921|ref|YP_272868.1| GTP-binding protein HflX [Pseudomonas syringae pv.	0
1150		gi|71734700|ref|YP_272870.1| HflC protein [Pseudomonas syringae pv. phaseolicol	0
1151		gi|71734175|ref|YP_272883.1| transglutaminase-like domain-containing protein [P	0
1152		gi|71734082|ref|YP_272884.1| hypothetical protein PSPPH_0584 [Pseudomonas syrin	0
1153		gi|71736128|ref|YP_272885.1| transglutaminase-like domain-containing protein [P	0
1154		gi|71733268|ref|YP_272943.1| polyamine ABC transporter periplasmic polyamine-bi	0
1155		gi|71736991|ref|YP_273097.1| calcium binding hemolysin protein [Pseudomonas syr	0
1156		gi|71735955|ref|YP_273114.1| tellurium resistance protein TerZ [Pseudomonas syr	0
1157		gi|71737234|ref|YP_273130.1| phosphotransferase system, fructose-specific IIBC	0
1158		gi|71734878|ref|YP_273232.1| glycosyl transferase, group 2 family protein [Pseu	0
1159		gi|71734199|ref|YP_273354.1| YebG family protein [Pseudomonas syringae pv. phas	0
1160		gi|71737101|ref|YP_273396.1| ATP-dependent RNA helicase RhlB [Pseudomonas syrin	0
1161		gi|71736281|ref|YP_273507.1| hypothetical protein PSPPH_1245 [Pseudomonas syrin	0
1162		gi|71736670|ref|YP_273566.1| iron-sulfur cluster assembly transcription factor	0
1163		gi|71733575|ref|YP_273605.1| hypothetical protein PSPPH_1347 [Pseudomonas syrin	0
1164		gi|71734342|ref|YP_273642.1| succinylglutamate desuccinylase/aspartoacylase fam	0
1165		gi|71733854|ref|YP_273704.1| hypothetical protein PSPPH_1449 [Pseudomonas syrin	0
1166		gi|71734166|ref|YP_273838.1| polyamine ABC transporter ATP-binding protein [Pse	0
1167		gi|71733620|ref|YP_273886.1| 3-oxoacyl-(acyl carrier protein) synthase II [Pseu	0
1168		gi|71734920|ref|YP_273930.1| hypothetical protein PSPPH_1693 [Pseudomonas syrin	0
1169		gi|71733250|ref|YP_274079.1| isochorismatase family protein [Pseudomonas syring	0
1170		gi|71736642|ref|YP_274082.1| transcription-repair coupling factor [Pseudomonas	0
1171		gi|71736554|ref|YP_274095.1| hypothetical protein PSPPH_1864 [Pseudomonas syrin	0
1172		gi|71737560|ref|YP_274297.1| ribosome modulation factor-like protein [Pseudomon	0
1173		gi|71733557|ref|YP_274309.1| hypothetical protein PSPPH_2090 [Pseudomonas syrin	0
1174		gi|71735884|ref|YP_274469.1| UTP-glucose-1-phosphate uridylyltransferase [Pseud	0
1175		gi|71734615|ref|YP_274504.1| high-affinity nickel-transport protein [Pseudomona	0
1176		gi|71736627|ref|YP_274522.1| phosphoglucomutase [Pseudomonas syringae pv. phase	0
1177		gi|71738090|ref|YP_274548.1| lipoprotein [Pseudomonas syringae pv. phaseolicola	0
1178		gi|71733236|ref|YP_274592.1| S24 family peptidase [Pseudomonas syringae pv. pha	0
1179		gi|71738098|ref|YP_274604.1| molybdenum ABC transporter periplasmic molybdate-b	0
1180		gi|71736430|ref|YP_274643.1| hypothetical protein PSPPH_2445 [Pseudomonas syrin	0
1181		gi|71734103|ref|YP_274700.1| cation ABC transporter periplasmic cation-binding	0
1182		gi|71737453|ref|YP_274732.1| type III secretion component [Pseudomonas syringae	0
1183		gi|71736184|ref|YP_274767.1| succinate-semialdehyde dehydrogenase (NADP+) [Pseu	0
1184		gi|71736255|ref|YP_274773.1| hypothetical protein PSPPH_2578 [Pseudomonas syrin	0
1185		gi|71733850|ref|YP_274791.1| transcriptional activator MltR [Pseudomonas syring	0
1186		gi|71737366|ref|YP_274844.1| lipoprotein [Pseudomonas syringae pv. phaseolicola	0
1187		gi|71735634|ref|YP_274868.1| hypothetical protein PSPPH_2678 [Pseudomonas syrin	0
1188		gi|71737136|ref|YP_274913.1| glycerone kinase [Pseudomonas syringae pv. phaseol	0
1189		gi|71734860|ref|YP_274951.1| hypothetical protein PSPPH_2762 [Pseudomonas syrin	0
1190		gi|71738160|ref|YP_274955.1| ISPsy16, transposase [Pseudomonas syringae pv. pha	0
1191		gi|71734051|ref|YP_275040.1| methyl-accepting chemotaxis protein [Pseudomonas s	0
1192		gi|71734977|ref|YP_275099.1| DNA-binding protein [Pseudomonas syringae pv. phas	0
1193		gi|71734406|ref|YP_275128.1| methyl-accepting chemotaxis protein [Pseudomonas s	0
1194		gi|71735396|ref|YP_275134.1| hypothetical protein PSPPH_2953 [Pseudomonas syrin	0
1195		gi|71736905|ref|YP_275152.1| methyl-accepting chemotaxis transducer/sensory box	0
1196		gi|71734787|ref|YP_275177.1| hypothetical protein PSPPH_2997 [Pseudomonas syrin	0
1197		gi|71736644|ref|YP_275296.1| sensor histidine kinase [Pseudomonas syringae pv.	0
1198		gi|71737807|ref|YP_275396.1| hypothetical protein PSPPH_3236 [Pseudomonas syrin	0
1199		gi|71735940|ref|YP_275500.1| prevent-host-death family protein [Pseudomonas syr	0
1200		gi|71734288|ref|YP_275517.1| chemotaxis-specific methylesterase [Pseudomonas sy	0
1201		gi|71736111|ref|YP_275537.1| flagellar biosynthesis chaperone [Pseudomonas syri	0
1202		gi|71735047|ref|YP_275559.1| flagellar basal body rod protein FlgG [Pseudomonas	0
1203		gi|71737476|ref|YP_275712.1| hypothetical protein PSPPH_3564 [Pseudomonas syrin	0
1204		gi|71734960|ref|YP_275829.1| hypothetical protein PSPPH_3687 [Pseudomonas syrin	0
1205		gi|71738134|ref|YP_276010.1| TetR family transcriptional regulator [Pseudomonas	0
1206		gi|71737529|ref|YP_276105.1| hypothetical protein PSPPH_3970 [Pseudomonas syrin	0
1207		gi|71737071|ref|YP_276200.1| sensor histidine kinase ColS [Pseudomonas syringae	0
1208		gi|71737569|ref|YP_276244.1| lipoprotein [Pseudomonas syringae pv. phaseolicola	0
1209		gi|71734643|ref|YP_276272.1| ABC transporter ATP-binding protein [Pseudomonas s	0
1210		gi|71737568|ref|YP_276275.1| PTS IIA-like nitrogen-regulatory protein PtsN [Pse	0
1211		gi|71736536|ref|YP_276345.1| tail tape meausure protein, truncated [Pseudomonas	0
1212		gi|71738000|ref|YP_276355.1| peptide ABC transporter permease [Pseudomonas syri	0
1213		gi|71734586|ref|YP_276532.1| sensory box histidine kinase [Pseudomonas syringae	0
1214		gi|71736694|ref|YP_276727.1| TetR family transcriptional regulator [Pseudomonas	0
1215		gi|71737346|ref|YP_276850.1| serine hydroxymethyltransferase [Pseudomonas syrin	0
1216		gi|71736811|ref|YP_276897.1| TldD/PmbA family protein [Pseudomonas syringae pv.	0
1217		gi|71737153|ref|YP_276932.1| hypothetical protein PSPPH_4838 [Pseudomonas syrin	0
1218		gi|71736478|ref|YP_276938.1| GTP-binding protein TypA [Pseudomonas syringae pv.	0
1219		gi|71734667|ref|YP_277066.1| hypothetical protein PSPPH_4981 [Pseudomonas syrin	0
1220		gi|71736982|ref|YP_277255.1| Mn-containing catalase [Pseudomonas syringae pv. p	0
1221		gi|71736510|ref|YP_277293.1| inner membrane protein translocase component YidC	0
1222		gi|71725189|ref|YP_272145.1| hypothetical protein PSPPH_A0021 [Pseudomonas syri	0
1223		gi|71725143|ref|YP_272179.1| fimbrial chaperone protein, periplasmic [Pseudomon	0
1224		gi|71725185|ref|YP_272207.1| ISPsy16, transposase [Pseudomonas syringae pv. pha	0
1225		gi|71725164|ref|YP_272220.1| hypothetical protein PSPPH_A0110 [Pseudomonas syri	0
1226		gi|71725158|ref|YP_272235.1| ISPsy16, transposase [Pseudomonas syringae pv. pha	0
1227		gi|71725184|ref|YP_272238.1| ISPsy16, transposase [Pseudomonas syringae pv. pha	0
1228		gi|71725189|ref|YP_272145.1| hypothetical protein PSPPH_A0021 [Pseudomonas syri	0
1229		gi|71725143|ref|YP_272179.1| fimbrial chaperone protein, periplasmic [Pseudomon	0
1230		gi|71725185|ref|YP_272207.1| ISPsy16, transposase [Pseudomonas syringae pv. pha	0
1231		gi|71725164|ref|YP_272220.1| hypothetical protein PSPPH_A0110 [Pseudomonas syri	0
1232		gi|71725158|ref|YP_272235.1| ISPsy16, transposase [Pseudomonas syringae pv. pha	0
1233		gi|71725184|ref|YP_272238.1| ISPsy16, transposase [Pseudomonas syringae pv. pha	0
1234		gi|71735115|ref|YP_272319.1| DNA gyrase subunit B [Pseudomonas syringae pv. pha	0
1235		gi|71735874|ref|YP_272326.1| glycyl-tRNA synthetase subunit alpha [Pseudomonas	0
1236		gi|71734550|ref|YP_272339.1| quinone oxidoreductase [Pseudomonas syringae pv. p	0
1237		gi|71734879|ref|YP_272360.1| hypothetical protein PSPPH_0048 [Pseudomonas syrin	1
1238		gi|71733459|ref|YP_272361.1| ISPsy18, transposase [Pseudomonas syringae pv. pha	1
1239		gi|71733945|ref|YP_272394.1| sigma-54 dependent transcriptional regulator [Pseu	1
1240		gi|71736743|ref|YP_272419.1| lipoprotein [Pseudomonas syringae pv. phaseolicola	1
1241		gi|71737316|ref|YP_272430.1| ISPsy18, transposase [Pseudomonas syringae pv. pha	1
1242		gi|71737586|ref|YP_272446.1| hypothetical protein PSPPH_0136 [Pseudomonas syrin	1
1243		gi|71733676|ref|YP_272464.1| hypothetical protein PSPPH_0156 [Pseudomonas syrin	1
1244		gi|71737636|ref|YP_272469.1| ISPsy18, transposase, truncated [Pseudomonas syrin	1
1245		gi|71734533|ref|YP_272504.1| guanylate kinase [Pseudomonas syringae pv. phaseol	1
1246		gi|71735786|ref|YP_272516.1| solute-binding family 5 protein [Pseudomonas syrin	1
1247		gi|71735792|ref|YP_272518.1| 50S ribosomal protein L33 [Pseudomonas syringae pv	1
1248		gi|71737850|ref|YP_272524.1| hypothetical protein PSPPH_0219 [Pseudomonas syrin	1
1249		gi|71733501|ref|YP_272526.1| hypothetical protein PSPPH_0221 [Pseudomonas syrin	1
1250		gi|71736059|ref|YP_272564.1| DNA polymerase I [Pseudomonas syringae pv. phaseol	1
1251		gi|71733226|ref|YP_272591.1| GntR family transcriptional regulator [Pseudomonas	1
1252		gi|71736028|ref|YP_272595.1| CDP-6-deoxy-delta-3,4-glucoseen reductase [Pseudom	1
1253		gi|71733591|ref|YP_272602.1| quinone oxidoreductase [Pseudomonas syringae pv. p	1
1254		gi|71737174|ref|YP_272617.1| lipoprotein [Pseudomonas syringae pv. phaseolicola	1
1255		gi|71735384|ref|YP_272618.1| hypothetical protein PSPPH_0315 [Pseudomonas syrin	1
1256		gi|71735640|ref|YP_272622.1| autotransporter [Pseudomonas syringae pv. phaseoli	1
1257		gi|71734743|ref|YP_272642.1| ISPsy18, transposase [Pseudomonas syringae pv. pha	1
1258		gi|71734969|ref|YP_272656.1| fructose-1,6-bisphosphatase [Pseudomonas syringae	1
1259		gi|71737999|ref|YP_272696.1| type IV pilus biogenesis protein PilP [Pseudomonas	1
1260		gi|71735197|ref|YP_272713.1| major facilitator superfamily protein [Pseudomonas	1
1261		gi|71734890|ref|YP_272719.1| lipoprotein [Pseudomonas syringae pv. phaseolicola	1
1262		gi|71735990|ref|YP_272745.1| malonate utilization transcriptional regulator [Ps	1
1263		gi|71733466|ref|YP_272756.1| hydroxypyruvate isomerase [Pseudomonas syringae pv	1
1264		gi|71737254|ref|YP_272764.1| hypothetical protein PSPPH_0461 [Pseudomonas syrin	1
1265		gi|71733387|ref|YP_272772.1| twitching motility protein [Pseudomonas syringae p	1
1266		gi|71734020|ref|YP_272807.1| hypothetical protein PSPPH_0505 [Pseudomonas syrin	1
1267		gi|71734499|ref|YP_272812.1| ADP-heptose--LPS heptosyltransferase II [Pseudomon	1
1268		gi|71734553|ref|YP_272825.1| hypothetical protein PSPPH_0523 [Pseudomonas syrin	1
1269		gi|71735591|ref|YP_272889.1| LysR family transcriptional regulator [Pseudomonas	1
1270		gi|71735038|ref|YP_272890.1| high affinity branched-chain amino acid ABC transp	1
1271		gi|71736477|ref|YP_272895.1| hypothetical protein PSPPH_0595 [Pseudomonas syrin	1
1272		gi|71737604|ref|YP_272900.1| geranyltranstransferase [Pseudomonas syringae pv.	1
1273		gi|71734450|ref|YP_272913.1| hypothetical protein PSPPH_0613 [Pseudomonas syrin	1
1274		gi|71736568|ref|YP_272917.1| ISPsy18, transposase [Pseudomonas syringae pv. pha	1
1275		gi|71736970|ref|YP_272918.1| RNA polymerase sigma factor RpoD [Pseudomonas syri	1
1276		gi|71734132|ref|YP_272928.1| protein kinase [Pseudomonas syringae pv. phaseolic	1
1277		gi|71736902|ref|YP_272936.1| hypothetical protein PSPPH_0637 [Pseudomonas syrin	1
1278		gi|71736578|ref|YP_272963.1| prophage PSPPH01, chitinase family protein [Pseudo	1
1279		gi|71736295|ref|YP_272977.1| ubiquinone biosynthesis protein [Pseudomonas syrin	1
1280		gi|71734529|ref|YP_272982.1| N-acetyl-gamma-glutamyl-phosphate reductase [Pseud	1
1281		gi|71735039|ref|YP_272987.1| exodeoxyribonuclease V subunit gamma [Pseudomonas	1
1282		gi|71736400|ref|YP_272992.1| ISPsy18, transposase [Pseudomonas syringae pv. pha	1
1283		gi|71733343|ref|YP_272993.1| fused ISPsy20 transposase IstB/transcriptional reg	1
1284		gi|71737645|ref|YP_273006.1| 50S ribosomal protein L27 [Pseudomonas syringae pv	1
1285		gi|71735569|ref|YP_273010.1| 30S ribosomal protein S20 [Pseudomonas syringae pv	1
1286		gi|71736209|ref|YP_273034.1| clpB protein [Pseudomonas syringae pv. phaseolicol	1
1287		gi|71737289|ref|YP_273036.1| ISPsy18, transposase, truncated [Pseudomonas syrin	1
1288		gi|71737264|ref|YP_273041.1| DNA repair ATPase [Pseudomonas syringae pv. phaseo	1
1289		gi|71733461|ref|YP_273054.1| thioredoxin domain-containing protein [Pseudomonas	1
1290		gi|71737531|ref|YP_273072.1| autotransporter [Pseudomonas syringae pv. phaseoli	1
1291		gi|71737441|ref|YP_273083.1| chemoreceptor glutamine deamidase CheD [Pseudomona	1
1292		gi|71736406|ref|YP_273098.1| zinc-binding protein [Pseudomonas syringae pv. pha	1
1293		gi|71737211|ref|YP_273102.1| type IV pilus biogenesis protein PilB [Pseudomonas	1
1294		gi|71733651|ref|YP_273104.1| ISPsy18, transposase [Pseudomonas syringae pv. pha	1
1295		gi|71736495|ref|YP_273113.1| HAD superfamily hydrolase [Pseudomonas syringae pv	1
1296		gi|71737590|ref|YP_273115.1| tellurium resistance protein TerA [Pseudomonas syr	1
1297		gi|71736611|ref|YP_273166.1| carbonic anhydrase [Pseudomonas syringae pv. phase	1
1298		gi|71733958|ref|YP_273169.1| acyltransferase family protein [Pseudomonas syring	1
1299		gi|71735010|ref|YP_273197.1| hypothetical protein PSPPH_0922 [Pseudomonas syrin	1
1300		gi|71736060|ref|YP_273206.1| hypothetical protein PSPPH_0932 [Pseudomonas syrin	1
1301		gi|71737756|ref|YP_273218.1| ISPsy22, transposase truncated [Pseudomonas syring	1
1302		gi|71737729|ref|YP_273226.1| lipopolysaccharide ABC export system, permease [Ps	1
1303		gi|71738026|ref|YP_273229.1| mannosyltransferase [Pseudomonas syringae pv. phas	1
1304		gi|71737112|ref|YP_273257.1| hypothetical protein PSPPH_0985 [Pseudomonas syrin	1
1305		gi|71734225|ref|YP_273266.1| TPR domain-containing protein [Pseudomonas syringa	1
1306		gi|71733434|ref|YP_273281.1| deoxyribodipyrimidine photolyase [Pseudomonas syri	1
1307		gi|71735110|ref|YP_273287.1| ferrochelatase [Pseudomonas syringae pv. phaseolic	1
1308		gi|71734657|ref|YP_273306.1| lipoprotein [Pseudomonas syringae pv. phaseolicola	1
1309		gi|71737963|ref|YP_273334.1| ISPsy18, transposase [Pseudomonas syringae pv. pha	1
1310		gi|71734722|ref|YP_273344.1| hypothetical protein PSPPH_1074 [Pseudomonas syrin	1
1311		gi|71733284|ref|YP_273348.1| hypothetical protein PSPPH_1078 [Pseudomonas syrin	1
1312		gi|71736630|ref|YP_273390.1| molybdenum cofactor biosynthesis protein MoaC [Pse	1
1313		gi|71734947|ref|YP_273413.1| nucleoid-associated protein NdpA [Pseudomonas syri	1
1314		gi|71735015|ref|YP_273421.1| YD repeat-containing protein [Pseudomonas syringae	1
1315		gi|71736237|ref|YP_273434.1| sensory box histidine kinase [Pseudomonas syringae	1
1316		gi|71733966|ref|YP_273437.1| hypothetical protein PSPPH_1170 [Pseudomonas syrin	1
1317		gi|71733942|ref|YP_273445.1| glucokinase [Pseudomonas syringae pv. phaseolicola	1
1318		gi|71737749|ref|YP_273469.1| hypothetical protein PSPPH_1203 [Pseudomonas syrin	1
1319		gi|71737087|ref|YP_273489.1| zinc-binding dehydrogenase family oxidoreductase [	1
1320		gi|71736855|ref|YP_273506.1| AsnC family transcriptional regulator [Pseudomonas	1
1321		gi|71733489|ref|YP_273511.1| glutathione S-transferase [Pseudomonas syringae pv	1
1322		gi|71733677|ref|YP_273526.1| type III chaperone protein AvrF [Pseudomonas syrin	1
1323		gi|71735870|ref|YP_273571.1| chaperone protein HscA [Pseudomonas syringae pv. p	1
1324		gi|71736467|ref|YP_273584.1| carbon-nitrogen family hydrolase [Pseudomonas syri	1
1325		gi|71735259|ref|YP_273589.1| exodeoxyribonuclease VII large subunit [Pseudomona	1
1326		gi|71733232|ref|YP_273594.1| ISPsy18, transposase [Pseudomonas syringae pv. pha	1
1327		gi|71736612|ref|YP_273622.1| ISPsy18, transposase [Pseudomonas syringae pv. pha	1
1328		gi|71734992|ref|YP_273636.1| ATP-binding Mrp/Nbp35 family protein [Pseudomonas	1
1329		gi|71735727|ref|YP_273647.1| mRNA 3''''-end processing factor [Pseudomonas syri	1
1330		gi|71734197|ref|YP_273655.1| hypothetical protein PSPPH_1399 [Pseudomonas syrin	1
1331		gi|71735058|ref|YP_273656.1| hypothetical protein PSPPH_1400 [Pseudomonas syrin	1
1332		gi|71733989|ref|YP_273664.1| OmpA family protein [Pseudomonas syringae pv. phas	1
1333		gi|71735053|ref|YP_273683.1| long-chain-fatty-acid--CoA ligase [Pseudomonas syr	1
1334		gi|71736031|ref|YP_273698.1| ISPsy18, transposase [Pseudomonas syringae pv. pha	1
1335		gi|71738126|ref|YP_273702.1| ISPsy22, transposase truncated [Pseudomonas syring	1
1336		gi|71736864|ref|YP_273711.1| hypothetical protein PSPPH_1456 [Pseudomonas syrin	1
1337		gi|71736292|ref|YP_273737.1| glucose/sorbosone family dehydrogenase [Pseudomona	1
1338		gi|71733205|ref|YP_273740.1| major facilitator family transporter [Pseudomonas	1
1339		gi|71734384|ref|YP_273751.1| amino acid ABC transporter permease [Pseudomonas s	1
1340		gi|71734517|ref|YP_273759.1| ISPsy18, transposase [Pseudomonas syringae pv. pha	1
1341		gi|71737333|ref|YP_273788.1| AhpC/Tsa family protein [Pseudomonas syringae pv.	1
1342		gi|71734052|ref|YP_273793.1| phosphoribosylaminoimidazole-succinocarboxamide sy	1
1343		gi|71733400|ref|YP_273803.1| hypothetical protein PSPPH_1551 [Pseudomonas syrin	1
1344		gi|71736226|ref|YP_273806.1| copper resistance protein B [Pseudomonas syringae	1
1345		gi|71733427|ref|YP_273809.1| protease II [Pseudomonas syringae pv. phaseolicola	1
1346		gi|71735911|ref|YP_273844.1| ISPsy18, transposase [Pseudomonas syringae pv. pha	1
1347		gi|71733619|ref|YP_273863.1| pirin [Pseudomonas syringae pv. phaseolicola 1448A	1
1348		gi|71734547|ref|YP_273898.1| LysM domain-containing protein [Pseudomonas syring	1
1349		gi|71735136|ref|YP_273921.1| ABC transporter ATP-binding protein [Pseudomonas s	1
1350		gi|71738038|ref|YP_273947.1| hydroxyacylglutathione hydrolase [Pseudomonas syri	1
1351		gi|71735419|ref|YP_273950.1| hypothetical protein PSPPH_1713 [Pseudomonas syrin	1
1352		gi|71737792|ref|YP_273962.1| cation transporter [Pseudomonas syringae pv. phase	1
1353		gi|71736688|ref|YP_273978.1| L-sorbosone dehydrogenase [Pseudomonas syringae pv	1
1354		gi|71736107|ref|YP_273979.1| carbohydrate transporter [Pseudomonas syringae pv.	1
1355		gi|71737145|ref|YP_274017.1| acid phosphatase [Pseudomonas syringae pv. phaseol	1
1356		gi|161611327|ref|YP_274022.2| erythronate-4-phosphate dehydrogenase [Pseudomona	1
1357		gi|71734385|ref|YP_274030.1| orotidine 5'-phosphate decarboxylase [Pseudomonas	1
1358		gi|71733456|ref|YP_274032.1| muramoyltetrapeptide carboxypeptidase [Pseudomonas	1
1359		gi|71734654|ref|YP_274044.1| hypothetical protein PSPPH_1811 [Pseudomonas syrin	1
1360		gi|71735225|ref|YP_274045.1| chorismate synthase [Pseudomonas syringae pv. phas	1
1361		gi|71735957|ref|YP_274083.1| glyceraldehyde-3-phosphate dehydrogenase [Pseudomo	1
1362		gi|71734004|ref|YP_274085.1| major facilitator family transporter [Pseudomonas	1
1363		gi|71733743|ref|YP_274091.1| lipoprotein releasing system, ATP-binding protein	1
1364		gi|71736117|ref|YP_274104.1| hypothetical protein PSPPH_1873 [Pseudomonas syrin	1
1365		gi|71735472|ref|YP_274106.1| hypothetical protein PSPPH_1875 [Pseudomonas syrin	1
1366		gi|71738037|ref|YP_274115.1| prophage PSPPH02, ISPsy18, transposase [Pseudomona	1
1367		gi|71733861|ref|YP_274118.1| hypothetical protein PSPPH_1890 [Pseudomonas syrin	1
1368		gi|71734946|ref|YP_274130.1| ISPsy18, transposase [Pseudomonas syringae pv. pha	1
1369		gi|71736179|ref|YP_274133.1| sensory box histidine kinase/response regulator [P	1
1370		gi|71738024|ref|YP_274147.1| hypothetical protein PSPPH_1919 [Pseudomonas syrin	1
1371		gi|71736908|ref|YP_274164.1| RND family efflux transporter MFP subunit [Pseudom	1
1372		gi|71735651|ref|YP_274179.1| aspartate-semialdehyde dehydrogenase [Pseudomonas	1
1373		gi|71736974|ref|YP_274190.1| hypothetical protein PSPPH_1966 [Pseudomonas syrin	1
1374		gi|71734632|ref|YP_274201.1| succinate dehydrogenase, hydrophobic membrane anch	1
1375		gi|71733276|ref|YP_274210.1| lipoprotein [Pseudomonas syringae pv. phaseolicola	1
1376		gi|71736877|ref|YP_274215.1| ISPsy18, transposase [Pseudomonas syringae pv. pha	1
1377		gi|71734728|ref|YP_274235.1| ISPsy18, transposase [Pseudomonas syringae pv. pha	1
1378		gi|71736719|ref|YP_274258.1| acyl-CoA thioesterase I [Pseudomonas syringae pv.	1
1379		gi|71737996|ref|YP_274274.1| GntR family transcriptional regulator [Pseudomonas	1
1380		gi|71735934|ref|YP_274283.1| cmaX protein [Pseudomonas syringae pv. phaseolicol	1
1381		gi|71736667|ref|YP_274331.1| molybdopterin biosynthesis protein MoeA [Pseudomon	1
1382		gi|71734358|ref|YP_274337.1| malate/L-lactate family dehydrogenase [Pseudomonas	1
1383		gi|71737128|ref|YP_274341.1| endonuclease I [Pseudomonas syringae pv. phaseolic	1
1384		gi|71735721|ref|YP_274343.1| lipoprotein [Pseudomonas syringae pv. phaseolicola	1
1385		gi|71733251|ref|YP_274347.1| ribose operon repressor [Pseudomonas syringae pv.	1
1386		gi|71737715|ref|YP_274371.1| prophage PSPPH03 tail assembly protein I [Pseudomo	1
1387		gi|71737912|ref|YP_274374.1| ISPsy18, transposase [Pseudomonas syringae pv. pha	1
1388		gi|71735909|ref|YP_274386.1| ISPsy18, transposase [Pseudomonas syringae pv. pha	1
1389		gi|71733925|ref|YP_274417.1| glycosyl hydrolase family protein [Pseudomonas syr	1
1390		gi|71735266|ref|YP_274419.1| hypothetical protein PSPPH_2207 [Pseudomonas syrin	1
1391		gi|71738077|ref|YP_274517.1| ISPsy18, transposase [Pseudomonas syringae pv. pha	1
1392		gi|71734207|ref|YP_274523.1| peptidyl-prolyl cis-trans isomerase C [Pseudomonas	1
1393		gi|71737765|ref|YP_274528.1| peptide ABC transporter periplasmic peptide-bindin	1
1394		gi|71734120|ref|YP_274535.1| CDP-diacylglycerol--glycerol-3-phosphate 3-phospha	1
1395		gi|71733550|ref|YP_274539.1| AP endonuclease [Pseudomonas syringae pv. phaseoli	1
1396		gi|71734932|ref|YP_274561.1| virA/G regulated gene [Pseudomonas syringae pv. ph	1
1397		gi|71737552|ref|YP_274575.1| hypothetical protein PSPPH_2374 [Pseudomonas syrin	1
1398		gi|71738067|ref|YP_274576.1| NtaA/SnaA/SoxA family monooxygenase [Pseudomonas s	1
1399		gi|71733921|ref|YP_274588.1| hypothetical protein PSPPH_2388 [Pseudomonas syrin	1
1400		gi|71736136|ref|YP_274607.1| zinc-binding oxidoreductase [Pseudomonas syringae	1
1401		gi|71735022|ref|YP_274612.1| FAD-binding oxidoreductase [Pseudomonas syringae p	1
1402		gi|71734139|ref|YP_274613.1| receptor family ligand binding protein [Pseudomona	1
1403		gi|71735018|ref|YP_274618.1| alcohol dehydrogenase, iron-containing [Pseudomona	1
1404		gi|71733406|ref|YP_274631.1| p-hydroxycinnamoyl CoA hydratase/lyase [Pseudomona	1
1405		gi|71733393|ref|YP_274639.1| ISPsy18, transposase [Pseudomonas syringae pv. pha	1
1406		gi|71735405|ref|YP_274647.1| ISPsy18, transposase [Pseudomonas syringae pv. pha	1
1407		gi|71737005|ref|YP_274664.1| mandelate racemase/muconate lactonizing enzyme fam	1
1408		gi|71734482|ref|YP_274678.1| UDP-galactopyranose mutase [Pseudomonas syringae p	1
1409		gi|71736374|ref|YP_274687.1| methyl-accepting chemotaxis protein [Pseudomonas s	1
1410		gi|71735611|ref|YP_274689.1| acetylornithine aminotransferase [Pseudomonas syri	1
1411		gi|71737177|ref|YP_274722.1| hypothetical protein PSPPH_2526 [Pseudomonas syrin	1
1412		gi|71736940|ref|YP_274737.1| ISPsy18, transposase [Pseudomonas syringae pv. pha	1
1413		gi|71735216|ref|YP_274775.1| LysR family transcriptional regulator [Pseudomonas	1
1414		gi|71737509|ref|YP_274779.1| hypothetical protein PSPPH_2584 [Pseudomonas syrin	1
1415		gi|71736005|ref|YP_274803.1| NADH pyrophosphatase [Pseudomonas syringae pv. pha	1
1416		gi|71734119|ref|YP_274824.1| OmpA family protein [Pseudomonas syringae pv. phas	1
1417		gi|71736524|ref|YP_274841.1| hypothetical protein PSPPH_2651 [Pseudomonas syrin	1
1418		gi|71737877|ref|YP_274856.1| hypothetical protein PSPPH_2666 [Pseudomonas syrin	1
1419		gi|71737429|ref|YP_274864.1| ABC transporter periplasmic substrate-binding prot	1
1420		gi|71736890|ref|YP_274889.1| peptide ABC transporter periplasmic peptide-bindin	1
1421		gi|71735775|ref|YP_274900.1| fatty acid desaturase family protein [Pseudomonas	1
1422		gi|71733542|ref|YP_274904.1| hypothetical protein PSPPH_2714 [Pseudomonas syrin	1
1423		gi|71736741|ref|YP_274920.1| hypothetical protein PSPPH_2731 [Pseudomonas syrin	1
1424		gi|71735768|ref|YP_274937.1| pupR protein [Pseudomonas syringae pv. phaseolicol	1
1425		gi|71737478|ref|YP_274946.1| achromobactin-binding periplasmic protein [Pseudom	1
1426		gi|71734265|ref|YP_274957.1| TrapT dctQ-M fusion permease, dicarboxylate transp	1
1427		gi|71733418|ref|YP_274968.1| hypothetical protein PSPPH_2780 [Pseudomonas syrin	1
1428		gi|71736957|ref|YP_274970.1| ISPsy18, transposase [Pseudomonas syringae pv. pha	1
1429		gi|71737835|ref|YP_274986.1| ISPsy18, transposase [Pseudomonas syringae pv. pha	1
1430		gi|71737321|ref|YP_274992.1| polysaccharide deacetylase family protein [Pseudom	1
1431		gi|71734092|ref|YP_274995.1| hypothetical protein PSPPH_2808 [Pseudomonas syrin	1
1432		gi|71736435|ref|YP_274998.1| hypothetical protein PSPPH_2811 [Pseudomonas syrin	1
1433		gi|71734727|ref|YP_275064.1| ABC transporter ATP-binding/permease [Pseudomonas	1
1434		gi|71734353|ref|YP_275093.1| luciferase family protein [Pseudomonas syringae pv	1
1435		gi|71733504|ref|YP_275110.1| phosphonate metabolism protein PhnN [Pseudomonas s	1
1436		gi|71734837|ref|YP_275147.1| methyl-accepting chemotaxis protein [Pseudomonas s	1
1437		gi|71737594|ref|YP_275149.1| metallo-beta-lactamase family protein [Pseudomonas	1
1438		gi|71737662|ref|YP_275160.1| ISPsy18, transposase [Pseudomonas syringae pv. pha	1
1439		gi|71734308|ref|YP_275161.1| two-component system sensor protein [Pseudomonas s	1
1440		gi|71735527|ref|YP_275169.1| tolQ protein [Pseudomonas syringae pv. phaseolicol	1
1441		gi|71733379|ref|YP_275186.1| iron compound ABC transporter periplasmic iron com	1
1442		gi|71735508|ref|YP_275197.1| phosphate ABC transporter phosphate-binding protei	1
1443		gi|71734280|ref|YP_275204.1| methyl-accepting chemotaxis protein [Pseudomonas s	1
1444		gi|71736776|ref|YP_275219.1| 3-hydroxyacyl-CoA-acyl carrier protein transferase	1
1445		gi|71735781|ref|YP_275234.1| general secretion pathway protein GspK [Pseudomona	1
1446		gi|71737208|ref|YP_275236.1| general secretion pathway protein GspI [Pseudomona	1
1447		gi|71736362|ref|YP_275237.1| general secretion pathway protein GspH [Pseudomona	1
1448		gi|71735466|ref|YP_275252.1| citrate transporter [Pseudomonas syringae pv. phas	1
1449		gi|71737736|ref|YP_275301.1| EamA family protein [Pseudomonas syringae pv. phas	1
1450		gi|71735869|ref|YP_275326.1| glycerophosphoryl diester phosphodiesterase [Pseud	1
1451		gi|71736411|ref|YP_275341.1| hypothetical protein PSPPH_3179 [Pseudomonas syrin	1
1452		gi|71734949|ref|YP_275352.1| iolL protein [Pseudomonas syringae pv. phaseolicol	1
1453		gi|71736293|ref|YP_275368.1| hypothetical protein PSPPH_3208 [Pseudomonas syrin	1
1454		gi|71733944|ref|YP_275394.1| ISPsy18, transposase [Pseudomonas syringae pv. pha	1
1455		gi|71733997|ref|YP_275407.1| IclR family transcriptional regulator [Pseudomonas	1
1456		gi|71735500|ref|YP_275433.1| acetyltransferase [Pseudomonas syringae pv. phaseo	1
1457		gi|71735632|ref|YP_275443.1| beta-lactamase [Pseudomonas syringae pv. phaseolic	1
1458		gi|71734548|ref|YP_275460.1| NodT family outer membrane efflux lipoprotein [Pse	1
1459		gi|71735273|ref|YP_275478.1| alanine racemase domain-containing protein [Pseudo	1
1460		gi|71736124|ref|YP_275488.1| ISPsy18, transposase [Pseudomonas syringae pv. pha	1
1461		gi|71733962|ref|YP_275491.1| hypothetical protein PSPPH_3333 [Pseudomonas syrin	1
1462		gi|71735540|ref|YP_275547.1| flagellar protein FliS [Pseudomonas syringae pv. p	1
1463		gi|71735315|ref|YP_275557.1| flagellar basal body P-ring protein [Pseudomonas s	1
1464		gi|71736309|ref|YP_275567.1| hypothetical protein PSPPH_3409 [Pseudomonas syrin	1
1465		gi|71735190|ref|YP_275572.1| flagellar basal body P-ring biosynthesis protein F	1
1466		gi|71734380|ref|YP_275580.1| glycosyl transferase, group 2 family protein [Pseu	1
1467		gi|71735064|ref|YP_275585.1| sensor histidine kinase [Pseudomonas syringae pv.	1
1468		gi|71736431|ref|YP_275596.1| short chain dehydrogenase/reductase family oxidore	1
1469		gi|71737479|ref|YP_275598.1| ISPsy18, transposase [Pseudomonas syringae pv. pha	1
1470		gi|71737394|ref|YP_275619.1| amidohydrolase [Pseudomonas syringae pv. phaseolic	1
1471		gi|71736674|ref|YP_275620.1| aldehyde dehydrogenase family protein [Pseudomonas	1
1472		gi|71735372|ref|YP_275631.1| hypothetical protein PSPPH_3477 [Pseudomonas syrin	1
1473		gi|71734080|ref|YP_275639.1| hypothetical protein PSPPH_3485 [Pseudomonas syrin	1
1474		gi|71737323|ref|YP_275641.1| transcriptional regulatory protein [Pseudomonas sy	1
1475		gi|71736472|ref|YP_275661.1| threonine aldolase, low-specificity [Pseudomonas s	1
1476		gi|161611334|ref|YP_275682.2| major facilitator superfamily transporter [Pseudo	1
1477		gi|71733857|ref|YP_275725.1| GntR family transcriptional regulator [Pseudomonas	1
1478		gi|71735601|ref|YP_275727.1| ISPsy18, transposase [Pseudomonas syringae pv. pha	1
1479		gi|71736474|ref|YP_275745.1| hypothetical protein PSPPH_3597 [Pseudomonas syrin	1
1480		gi|71734290|ref|YP_275752.1| hypothetical protein PSPPH_3605 [Pseudomonas syrin	1
1481		gi|71737091|ref|YP_275755.1| ABC transporter ATP-binding protein [Pseudomonas s	1
1482		gi|71737927|ref|YP_275762.1| acyl-CoA dehydrogenase family protein [Pseudomonas	1
1483		gi|71733885|ref|YP_275782.1| ISPsy18, transposase [Pseudomonas syringae pv. pha	1
1484		gi|71733961|ref|YP_275806.1| prephenate dehydrogenase/3-phosphoshikimate 1-carb	1
1485		gi|71737828|ref|YP_275839.1| cobyric acid synthase [Pseudomonas syringae pv. ph	1
1486		gi|71737897|ref|YP_275845.1| L-sorbosone dehydrogenase [Pseudomonas syringae pv	1
1487		gi|71736721|ref|YP_275862.1| hypothetical protein PSPPH_3720 [Pseudomonas syrin	1
1488		gi|71737240|ref|YP_275868.1| C32 tRNA thiolase [Pseudomonas syringae pv. phaseo	1
1489		gi|71738174|ref|YP_275876.1| siderophore biosynthesis protein [Pseudomonas syri	1
1490		gi|71737813|ref|YP_275907.1| translocation protein TolB [Pseudomonas syringae p	1
1491		gi|71734530|ref|YP_275954.1| alcohol dehydrogenase, class III [Pseudomonas syri	1
1492		gi|71736202|ref|YP_275955.1| LysR family transcriptional regulator [Pseudomonas	1
1493		gi|71738075|ref|YP_275964.1| ribonuclease HII [Pseudomonas syringae pv. phaseol	1
1494		gi|71737341|ref|YP_275972.1| 1-deoxy-D-xylulose 5-phosphate reductoisomerase [P	1
1495		gi|71736544|ref|YP_275981.1| succinyldiaminopimelate transaminase [Pseudomonas	1
1496		gi|71735578|ref|YP_275989.1| ribosomal RNA large subunit methyltransferase A [P	1
1497		gi|71737997|ref|YP_276028.1| bacterioferritin [Pseudomonas syringae pv. phaseol	1
1498		gi|71738002|ref|YP_276029.1| glutaredoxin-like protein [Pseudomonas syringae pv	1
1499		gi|71737049|ref|YP_276038.1| glycerol-3-phosphate dehydrogenase [Pseudomonas sy	1
1500		gi|71736718|ref|YP_276062.1| hypothetical protein PSPPH_3926 [Pseudomonas syrin	1
1501		gi|71734237|ref|YP_276112.1| ISPsy18, transposase [Pseudomonas syringae pv. pha	1
1502		gi|71733626|ref|YP_276131.1| beta-glucosidase [Pseudomonas syringae pv. phaseol	1
1503		gi|71733675|ref|YP_276147.1| beta-ketoadipyl CoA thiolase [Pseudomonas syringae	1
1504		gi|71736413|ref|YP_276151.1| hypothetical protein PSPPH_4021 [Pseudomonas syrin	1
1505		gi|71737035|ref|YP_276171.1| insecticidal toxin protein [Pseudomonas syringae p	1
1506		gi|71735547|ref|YP_276172.1| ISPsy18, transposase [Pseudomonas syringae pv. pha	1
1507		gi|71736936|ref|YP_276185.1| hypothetical protein PSPPH_4059 [Pseudomonas syrin	1
1508		gi|71734976|ref|YP_276211.1| ISPsy18, transposase [Pseudomonas syringae pv. pha	1
1509		gi|71737095|ref|YP_276245.1| ClpXP protease specificity-enhancing factor [Pseud	1
1510		gi|71733712|ref|YP_276250.1| ATPase [Pseudomonas syringae pv. phaseolicola 1448	1
1511		gi|71734448|ref|YP_276251.1| tryptophanyl-tRNA synthetase [Pseudomonas syringae	1
1512		gi|71736275|ref|YP_276274.1| ribosomal subunit interface protein [Pseudomonas s	1
1513		gi|71736596|ref|YP_276279.1| ISPsy18, transposase [Pseudomonas syringae pv. pha	1
1514		gi|71734102|ref|YP_276292.1| rod shape-determining protein MreD [Pseudomonas sy	1
1515		gi|71737200|ref|YP_276293.1| rod shape-determining protein MreC [Pseudomonas sy	1
1516		gi|71733744|ref|YP_276323.1| carbamoyl phosphate synthase small subunit [Pseudo	1
1517		gi|71734137|ref|YP_276324.1| dihydrodipicolinate reductase [Pseudomonas syringa	1
1518		gi|71737020|ref|YP_276333.1| sodium-dependent transporter [Pseudomonas syringae	1
1519		gi|71737245|ref|YP_276343.1| hypothetical protein PSPPH_4224 [Pseudomonas syrin	1
1520		gi|71735744|ref|YP_276346.1| ISPsy18, transposase [Pseudomonas syringae pv. pha	1
1521		gi|71735677|ref|YP_276347.1| acetyltransferase [Pseudomonas syringae pv. phaseo	1
1522		gi|71733555|ref|YP_276350.1| hypothetical protein PSPPH_4231 [Pseudomonas syrin	1
1523		gi|71734864|ref|YP_276370.1| 5-dehydro-4-deoxyglucarate dehydratase [Pseudomona	1
1524		gi|71733937|ref|YP_276385.1| ISPsy18, transposase [Pseudomonas syringae pv. pha	1
1525		gi|71737293|ref|YP_276388.1| ISPsy18, transposase [Pseudomonas syringae pv. pha	1
1526		gi|71736181|ref|YP_276400.1| FKBP-type peptidyl-prolyl cis-trans isomerase [Pse	1
1527		gi|71735420|ref|YP_276411.1| ABC transporter ATP-binding protein [Pseudomonas s	1
1528		gi|71737212|ref|YP_276423.1| hypothetical protein PSPPH_4305 [Pseudomonas syrin	1
1529		gi|71736968|ref|YP_276427.1| deoxycytidine triphosphate deaminase [Pseudomonas	1
1530		gi|71738142|ref|YP_276452.1| ISPsy18, transposase [Pseudomonas syringae pv. pha	1
1531		gi|71737320|ref|YP_276465.1| HAD superfamily hydrolase [Pseudomonas syringae pv	1
1532		gi|71734015|ref|YP_276478.1| ISPsy18, transposase [Pseudomonas syringae pv. pha	1
1533		gi|71734427|ref|YP_276481.1| ISPsy18, transposase [Pseudomonas syringae pv. pha	1
1534		gi|71735953|ref|YP_276512.1| DNA polymerase III subunit delta [Pseudomonas syri	1
1535		gi|71737875|ref|YP_276535.1| LuxR family DNA binding response regulator [Pseudo	1
1536		gi|71735676|ref|YP_276539.1| translation initiation factor Sui1 [Pseudomonas sy	1
1537		gi|71734075|ref|YP_276552.1| general secretion pathway/type 4 pilus assembly pr	1
1538		gi|71737471|ref|YP_276559.1| acetyl-CoA carboxylase biotin carboxyl carrier pro	1
1539		gi|71736256|ref|YP_276562.1| hypothetical protein PSPPH_4446 [Pseudomonas syrin	1
1540		gi|71733629|ref|YP_276592.1| phosphinothricin N-acetyltransferase [Pseudomonas	1
1541		gi|71735175|ref|YP_276608.1| ISPsy18, transposase [Pseudomonas syringae pv. pha	1
1542		gi|71736320|ref|YP_276610.1| AsmA family protein [Pseudomonas syringae pv. phas	1
1543		gi|71733452|ref|YP_276618.1| thiamine monophosphate kinase [Pseudomonas syringa	1
1544		gi|71734292|ref|YP_276648.1| glycerol-3-phosphate ABC transporter permease [Pse	1
1545		gi|71734354|ref|YP_276671.1| hypothetical protein PSPPH_4556 [Pseudomonas syrin	1
1546		gi|71737227|ref|YP_276677.1| excinuclease ABC subunit A [Pseudomonas syringae p	1
1547		gi|71735730|ref|YP_276679.1| catalase KatA [Pseudomonas syringae pv. phaseolico	1
1548		gi|71737691|ref|YP_276703.1| 50S ribosomal protein L2 [Pseudomonas syringae pv.	1
1549		gi|71735901|ref|YP_276704.1| 50S ribosomal protein L23 [Pseudomonas syringae pv	1
1550		gi|71736691|ref|YP_276705.1| 50S ribosomal protein L4 [Pseudomonas syringae pv.	1
1551		gi|71736464|ref|YP_276706.1| 50S ribosomal protein L3 [Pseudomonas syringae pv.	1
1552		gi|71733539|ref|YP_276714.1| 50S ribosomal protein L7/L12 [Pseudomonas syringae	1
1553		gi|71737746|ref|YP_276729.1| ABC transporter ATP-binding protein [Pseudomonas s	1
1554		gi|71737160|ref|YP_276743.1| LysR family transcriptional regulator [Pseudomonas	1
1555		gi|71735741|ref|YP_276745.1| Bcr/CflA subfamily drug resistance transporter [Ps	1
1556		gi|71737601|ref|YP_276747.1| hypothetical protein PSPPH_4642 [Pseudomonas syrin	1
1557		gi|71735236|ref|YP_276758.1| hypothetical protein PSPPH_4653 [Pseudomonas syrin	1
1558		gi|71737518|ref|YP_276827.1| ABC transporter ATP-binding protein [Pseudomonas s	1
1559		gi|71736436|ref|YP_276835.1| malate synthase G [Pseudomonas syringae pv. phaseo	1
1560		gi|71735807|ref|YP_276836.1| ISPsy18, transposase [Pseudomonas syringae pv. pha	1
1561		gi|71736920|ref|YP_276854.1| sarcosine oxidase subunit gamma [Pseudomonas syrin	1
1562		gi|71733412|ref|YP_276857.1| ISPsy18, transposase [Pseudomonas syringae pv. pha	1
1563		gi|71735356|ref|YP_276873.1| tRNA (guanine-N(7)-)-methyltransferase [Pseudomona	1
1564		gi|71736786|ref|YP_276875.1| sulfur carrier protein ThiS [Pseudomonas syringae	1
1565		gi|71735431|ref|YP_276883.1| M16 family peptidase [Pseudomonas syringae pv. pha	1
1566		gi|71735833|ref|YP_276912.1| hypothetical protein PSPPH_4814 [Pseudomonas syrin	1
1567		gi|71734629|ref|YP_276931.1| ISPsy18, transposase [Pseudomonas syringae pv. pha	1
1568		gi|71734625|ref|YP_276951.1| LacI family transcription regulator [Pseudomonas s	1
1569		gi|71734170|ref|YP_276952.1| BCCT family transporter [Pseudomonas syringae pv.	1
1570		gi|71737880|ref|YP_276953.1| urocanate hydratase [Pseudomonas syringae pv. phas	1
1571		gi|71735933|ref|YP_276954.1| histidine transporter, periplasmic histidine-bindi	1
1572		gi|71737368|ref|YP_276971.1| threonine dehydratase [Pseudomonas syringae pv. ph	1
1573		gi|71736486|ref|YP_276981.1| penicillin amidase family protein [Pseudomonas syr	1
1574		gi|71737459|ref|YP_276990.1| TetR family transcriptional regulator [Pseudomonas	1
1575		gi|71736948|ref|YP_276994.1| aliphatic sulfonates ABC transporter permease [Pse	1
1576		gi|71735789|ref|YP_276999.1| taurine transporter ATP-binding subunit [Pseudomon	1
1577		gi|71737140|ref|YP_277002.1| RNA methyltransferase [Pseudomonas syringae pv. ph	1
1578		gi|71737911|ref|YP_277018.1| MFS permease-like protein [Pseudomonas syringae pv	1
1579		gi|71733357|ref|YP_277022.1| ISPsy18, transposase [Pseudomonas syringae pv. pha	1
1580		gi|71735051|ref|YP_277027.1| amino acid ABC transporter ATP-binding protein [Ps	1
1581		gi|71734998|ref|YP_277053.1| prophage PSPPH06 head completion/stabilization pro	1
1582		gi|71736654|ref|YP_277068.1| prophage PSPPH06 tail tape meausure domain-contain	1
1583		gi|71736735|ref|YP_277078.1| hypothetical protein PSPPH_4993 [Pseudomonas syrin	1
1584		gi|71736299|ref|YP_277079.1| levansucrase LscC [Pseudomonas syringae pv. phaseo	1
1585		gi|71734360|ref|YP_277162.1| hypothetical protein PSPPH_5080 [Pseudomonas syrin	1
1586		gi|71736703|ref|YP_277170.1| hypothetical protein PSPPH_5088 [Pseudomonas syrin	1
1587		gi|71735734|ref|YP_277171.1| hypothetical protein PSPPH_5089 [Pseudomonas syrin	1
1588		gi|71733592|ref|YP_277178.1| coenzyme A transferase PsecoA [Pseudomonas syringa	1
1589		gi|71737872|ref|YP_277180.1| hypothetical protein PSPPH_5103 [Pseudomonas syrin	1
1590		gi|71738007|ref|YP_277187.1| rubredoxin reductase [Pseudomonas syringae pv. pha	1
1591		gi|71734800|ref|YP_277190.1| 4-hydroxybenzoate octaprenyltransferase [Pseudomon	1
1592		gi|71734045|ref|YP_277200.1| phosphate ABC transporter periplasmic phosphate-bi	1
1593		gi|71735965|ref|YP_277208.1| hypothetical protein PSPPH_5131 [Pseudomonas syrin	1
1594		gi|71736690|ref|YP_277221.1| LysR family transcriptional regulator [Pseudomonas	1
1595		gi|71735681|ref|YP_277225.1| Tim44-like domain-contain protein [Pseudomonas syr	1
1596		gi|71737692|ref|YP_277275.1| ISPsy18, transposase [Pseudomonas syringae pv. pha	1
1597		gi|71725177|ref|YP_272129.1| hypothetical protein PSPPH_A0001 [Pseudomonas syri	1
1598		gi|71725214|ref|YP_272148.1| hypothetical protein PSPPH_A0025 [Pseudomonas syri	1
1599		gi|71725251|ref|YP_272150.1| levansucrase (Beta-D-fructofuranosyl transferase)(	1
1600		gi|71725260|ref|YP_272151.1| hypothetical protein PSPPH_A0028 [Pseudomonas syri	1
1601		gi|71725237|ref|YP_272155.1| transposase family protein, truncated [Pseudomonas	1
1602		gi|71725163|ref|YP_272178.1| LysRfamily transcriptioanl regulator [Pseudomonas	1
1603		gi|71725213|ref|YP_272197.1| transposase, truncated [Pseudomonas syringae pv. p	1
1604		gi|71725166|ref|YP_272202.1| hypothetical protein PSPPH_A0092 [Pseudomonas syri	1
1605		gi|71725265|ref|YP_272212.1| YacA [Pseudomonas syringae pv. phaseolicola 1448A]	1
1606		gi|71725181|ref|YP_272215.1| carbon storage regulator-related protein [Pseudomo	1
1607		gi|71725225|ref|YP_272225.1| ISPsy18, transposase, truncated [Pseudomonas syrin	1
1608		gi|71725233|ref|YP_272227.1| ISPsy2, transposase truncated [Pseudomonas syringa	1
1609		gi|71725177|ref|YP_272129.1| hypothetical protein PSPPH_A0001 [Pseudomonas syri	1
1610		gi|71725214|ref|YP_272148.1| hypothetical protein PSPPH_A0025 [Pseudomonas syri	1
1611		gi|71725251|ref|YP_272150.1| levansucrase (Beta-D-fructofuranosyl transferase)(	1
1612		gi|71725260|ref|YP_272151.1| hypothetical protein PSPPH_A0028 [Pseudomonas syri	1
1613		gi|71725237|ref|YP_272155.1| transposase family protein, truncated [Pseudomonas	1
1614		gi|71725163|ref|YP_272178.1| LysRfamily transcriptioanl regulator [Pseudomonas	1
1615		gi|71725213|ref|YP_272197.1| transposase, truncated [Pseudomonas syringae pv. p	1
1616		gi|71725166|ref|YP_272202.1| hypothetical protein PSPPH_A0092 [Pseudomonas syri	1
1617		gi|71725265|ref|YP_272212.1| YacA [Pseudomonas syringae pv. phaseolicola 1448A]	1
1618		gi|71725181|ref|YP_272215.1| carbon storage regulator-related protein [Pseudomo	1
1619		gi|71725225|ref|YP_272225.1| ISPsy18, transposase, truncated [Pseudomonas syrin	1
1620		gi|71725233|ref|YP_272227.1| ISPsy2, transposase truncated [Pseudomonas syringa	1
1621		gi|71737534|ref|YP_272384.1| hypothetical protein PSPPH_0072 [Pseudomonas syrin	1
1622		gi|71737051|ref|YP_272445.1| hypothetical protein PSPPH_0135 [Pseudomonas syrin	1
1623		gi|71736980|ref|YP_272493.1| hypothetical protein PSPPH_0188 [Pseudomonas syrin	1
1624		gi|71734213|ref|YP_272562.1| thiol:disulfide interchange protein DsbA [Pseudomo	2
1625		gi|71734825|ref|YP_272710.1| gluconate transporter family protein [Pseudomonas	2
1626		gi|71736305|ref|YP_272852.1| phosphoserine phosphatase SerB [Pseudomonas syring	2
1627		gi|71736399|ref|YP_272887.1| NAD synthetase [Pseudomonas syringae pv. phaseolic	2
1628		gi|71736589|ref|YP_272931.1| ApaG [Pseudomonas syringae pv. phaseolicola 1448A]	2
1629		gi|71736689|ref|YP_272958.1| hypothetical protein PSPPH_0659 [Pseudomonas syrin	2
1630		gi|71733832|ref|YP_273299.1| ATP binding protein [Pseudomonas syringae pv. phas	2
1631		gi|71735445|ref|YP_273353.1| UDP-N-acetylglucosamine 2-epimerase [Pseudomonas s	2
1632		gi|71735672|ref|YP_273414.1| TetR family transcriptional regulator-like protein	2
1633		gi|71734148|ref|YP_273540.1| type III negative regulator of hrp expression HrpV	2
1634		gi|71737435|ref|YP_273560.1| preprotein translocase subunit SecD [Pseudomonas s	2
1635		gi|71735846|ref|YP_273582.1| GTP-binding protein EngA [Pseudomonas syringae pv.	2
1636		gi|71736526|ref|YP_273608.1| major facilitator family transporter [Pseudomonas	2
1637		gi|71735456|ref|YP_273617.1| thiol:disulfide interchange protein DsbC [Pseudomo	2
1638		gi|71733553|ref|YP_273776.1| aerotaxis receptor Aer [Pseudomonas syringae pv. p	2
1639		gi|71734244|ref|YP_273796.1| gas vesicle protein [Pseudomonas syringae pv. phas	2
1640		gi|71735299|ref|YP_273891.1| type IV pilus biogenesis protein PilZ [Pseudomonas	2
1641		gi|71737567|ref|YP_273899.1| tRNA pseudouridine synthase A [Pseudomonas syringa	2
1642		gi|71733728|ref|YP_273959.1| transporter [Pseudomonas syringae pv. phaseolicola	2
1643		gi|71736631|ref|YP_273993.1| LysR family transcriptional regulator [Pseudomonas	2
1644		gi|71736258|ref|YP_274007.1| xanthine dehydrogenase accessory factor XdhC [Pseu	2
1645		gi|71735979|ref|YP_274074.1| hypothetical protein PSPPH_1842 [Pseudomonas syrin	2
1646		gi|71737824|ref|YP_274334.1| hypothetical protein PSPPH_2115 [Pseudomonas syrin	2
1647		gi|71737612|ref|YP_274377.1| hypothetical protein PSPPH_2160 [Pseudomonas syrin	2
1648		gi|71736178|ref|YP_274410.1| hypothetical protein PSPPH_2198 [Pseudomonas syrin	2
1649		gi|71736725|ref|YP_274421.1| acetyl-CoA acetyltransferase [Pseudomonas syringae	2
1650		gi|71733341|ref|YP_274475.1| alkyl hydroperoxide reductase subunit F [Pseudomon	2
1651		gi|71735071|ref|YP_274484.1| amino acid ABC transporter ATP-binding protein [Ps	2
1652		gi|71737895|ref|YP_274515.1| zinc-binding oxidoreductase [Pseudomonas syringae	2
1653		gi|71735785|ref|YP_274555.1| D-xylose ABC transporter permease [Pseudomonas syr	2
1654		gi|71733686|ref|YP_274632.1| vanillin dehydrogenase [Pseudomonas syringae pv. p	2
1655		gi|71734973|ref|YP_274719.1| TPR domain-containing protein [Pseudomonas syringa	2
1656		gi|71737134|ref|YP_274741.1| oxidoreductase iron-sulfur binding subunit [Pseudo	2
1657		gi|71736168|ref|YP_274750.1| LysR family transcriptional regulator [Pseudomonas	2
1658		gi|71733426|ref|YP_274754.1| polyamine ABC transporter periplasmic polyamine-bi	2
1659		gi|71737286|ref|YP_274761.1| 3-oxoadipate enol-lactonase [Pseudomonas syringae	2
1660		gi|71736549|ref|YP_274814.1| esterified fatty acid cis/trans isomerase [Pseudom	2
1661		gi|71733635|ref|YP_274850.1| amino acid ABC transporter periplasmic amino acid-	2
1662		gi|71735111|ref|YP_274924.1| hypothetical protein PSPPH_2735 [Pseudomonas syrin	2
1663		gi|71734950|ref|YP_274932.1| ABC transporter permease [Pseudomonas syringae pv.	2
1664		gi|71733295|ref|YP_274988.1| hypothetical protein PSPPH_2801 [Pseudomonas syrin	2
1665		gi|71734483|ref|YP_274996.1| UDP-glucose 6-dehydrogenase [Pseudomonas syringae	2
1666		gi|71734400|ref|YP_275003.1| phosphoesterase [Pseudomonas syringae pv. phaseoli	2
1667		gi|71736425|ref|YP_275019.1| ABC transporter permease [Pseudomonas syringae pv.	2
1668		gi|71733783|ref|YP_275061.1| glycosyl hydrolase family protein [Pseudomonas syr	2
1669		gi|71737755|ref|YP_275067.1| aldolase II superfamily protein [Pseudomonas syrin	2
1670		gi|71735398|ref|YP_275070.1| TonB system transport protein ExbB2 [Pseudomonas s	2
1671		gi|71734291|ref|YP_275136.1| major facilitator family transporter [Pseudomonas	2
1672		gi|71737679|ref|YP_275182.1| dipeptide ABC transporter ATP-binding protein [Pse	2
1673		gi|71736334|ref|YP_275233.1| general secretion pathway protein GspL [Pseudomona	2
1674		gi|71734956|ref|YP_275270.1| isocitrate dehydrogenase, NADP-dependent [Pseudomo	2
1675		gi|71735148|ref|YP_275273.1| hypothetical protein PSPPH_3103 [Pseudomonas syrin	2
1676		gi|71736206|ref|YP_275307.1| glycosyl transferase, group 2 family protein [Pseu	2
1677		gi|71735897|ref|YP_275427.1| hypothetical protein PSPPH_3267 [Pseudomonas syrin	2
1678		gi|71737045|ref|YP_275479.1| endoribonuclease L-PSP family protein [Pseudomonas	2
1679		gi|71736236|ref|YP_275501.1| PilT domain-containing protein [Pseudomonas syring	2
1680		gi|71737596|ref|YP_275647.1| ISPsy16, transposase [Pseudomonas syringae pv. pha	2
1681		gi|71737462|ref|YP_275714.1| von Willebrand factor type A domain-containing pro	2
1682		gi|71736834|ref|YP_275918.1| Dps family protein [Pseudomonas syringae pv. phase	2
1683		gi|71737906|ref|YP_275922.1| porin D [Pseudomonas syringae pv. phaseolicola 144	2
1684		gi|71734064|ref|YP_276117.1| transcriptional regulatory protein [Pseudomonas sy	2
1685		gi|71736623|ref|YP_276135.1| chaperone protein HscC [Pseudomonas syringae pv. p	2
1686		gi|71733332|ref|YP_276163.1| haloacid dehalogenase, type II, truncated [Pseudom	2
1687		gi|71733593|ref|YP_276240.1| hypothetical protein PSPPH_4118 [Pseudomonas syrin	2
1688		gi|71737031|ref|YP_276547.1| response regulator [Pseudomonas syringae pv. phase	2
1689		gi|71735219|ref|YP_276606.1| hypothetical protein PSPPH_4490 [Pseudomonas syrin	2
1690		gi|71733213|ref|YP_276664.1| hypothetical protein PSPPH_4549 [Pseudomonas syrin	2
1691		gi|71737853|ref|YP_276680.1| 50S ribosomal protein L17 [Pseudomonas syringae pv	2
1692		gi|71736608|ref|YP_276728.1| thymidylate synthase [Pseudomonas syringae pv. pha	2
1693		gi|71738165|ref|YP_276738.1| iron-dicitrate transporter ATP-binding subunit [Ps	2
1694		gi|71736846|ref|YP_276906.1| glycosyl hydrolase family protein [Pseudomonas syr	2
1695		gi|71737291|ref|YP_276992.1| molybdenum-pterin binding domain-containing protei	2
1696		gi|71736094|ref|YP_277096.1| MutT/nudix family protein [Pseudomonas syringae pv	2
1697		gi|71735733|ref|YP_277181.1| hypothetical protein PSPPH_5104 [Pseudomonas syrin	2
1698		gi|71737844|ref|YP_277227.1| sodium/hydrogen exchanger family protein [Pseudomo	2
1699		gi|71735519|ref|YP_277289.1| chromosome partitioning protein ParA [Pseudomonas	2
1700		gi|71725250|ref|YP_272251.1| conjugal transfer protein [Pseudomonas syringae pv	2
1701		gi|71725206|ref|YP_272253.1| conjugal transfer protein [Pseudomonas syringae pv	2
1702		gi|71725250|ref|YP_272251.1| conjugal transfer protein [Pseudomonas syringae pv	2
1703		gi|71725206|ref|YP_272253.1| conjugal transfer protein [Pseudomonas syringae pv	2
1704		gi|71737239|ref|YP_272334.1| methionyl-tRNA formyltransferase [Pseudomonas syri	2
1705		gi|71736102|ref|YP_272336.1| LysM domain-containing protein [Pseudomonas syring	2
1706		gi|71734768|ref|YP_272355.1| luciferase family protein [Pseudomonas syringae pv	2
1707		gi|71738146|ref|YP_272379.1| porphobilinogen deaminase [Pseudomonas syringae pv	3
1708		gi|71734140|ref|YP_272385.1| hypothetical protein PSPPH_0073 [Pseudomonas syrin	3
1709		gi|71735782|ref|YP_272388.1| methyl-accepting chemotaxis protein [Pseudomonas s	3
1710		gi|71735385|ref|YP_272396.1| pyridine nucleotide-disulfide oxidoreductase [Pseu	3
1711		gi|71738121|ref|YP_272398.1| Sulfate/thiosulfate import ATP-binding protein cys	3
1712		gi|71734610|ref|YP_272401.1| sulfate-binding protein [Pseudomonas syringae pv.	3
1713		gi|71735249|ref|YP_272409.1| pyridine nucleotide-disulfide oxidoreductase [Pseu	3
1714		gi|71735008|ref|YP_272417.1| type I restriction-modification system specificity	3
1715		gi|71734711|ref|YP_272427.1| lipoprotein [Pseudomonas syringae pv. phaseolicola	3
1716		gi|71737480|ref|YP_272432.1| hypothetical protein PSPPH_0122 [Pseudomonas syrin	3
1717		gi|71733264|ref|YP_272447.1| hypothetical protein PSPPH_0138 [Pseudomonas syrin	3
1718		gi|71737745|ref|YP_272455.1| sigma-54 dependent DNA-binding response regulator	3
1719		gi|71736941|ref|YP_272460.1| carbon-nitrogen hydrolase family protein [Pseudomo	3
1720		gi|71734935|ref|YP_272515.1| DNA repair protein RadC [Pseudomonas syringae pv.	3
1721		gi|71736327|ref|YP_272517.1| 50S ribosomal protein L28 [Pseudomonas syringae pv	3
1722		gi|71735222|ref|YP_272521.1| hypothetical protein PSPPH_0216 [Pseudomonas syrin	3
1723		gi|71734241|ref|YP_272535.1| hypothetical protein PSPPH_0230 [Pseudomonas syrin	3
1724		gi|71737975|ref|YP_272551.1| osmolarity response regulator [Pseudomonas syringa	3
1725		gi|71738062|ref|YP_272555.1| hypothetical protein PSPPH_0250 [Pseudomonas syrin	3
1726		gi|71734761|ref|YP_272565.1| hypothetical protein PSPPH_0260 [Pseudomonas syrin	3
1727		gi|71736676|ref|YP_272585.1| polyphosphate kinase [Pseudomonas syringae pv. pha	3
1728		gi|71734895|ref|YP_272603.1| flagellar basal body-associated protein FliL-like	3
1729		gi|71735746|ref|YP_272607.1| hypothetical protein PSPPH_0303 [Pseudomonas syrin	3
1730		gi|71737785|ref|YP_272609.1| hypothetical protein PSPPH_0305 [Pseudomonas syrin	3
1731		gi|71736380|ref|YP_272654.1| outer membrane lipoprotein Blc [Pseudomonas syring	3
1732		gi|71733463|ref|YP_272657.1| hypothetical protein PSPPH_0354 [Pseudomonas syrin	3
1733		gi|71736284|ref|YP_272661.1| D-tyrosyl-tRNA(Tyr) deacylase [Pseudomonas syringa	3
1734		gi|71735453|ref|YP_272689.1| 50S ribosomal protein L31 [Pseudomonas syringae pv	3
1735		gi|71733321|ref|YP_272717.1| thioester dehydrase family protein [Pseudomonas sy	3
1736		gi|71737063|ref|YP_272739.1| malonate decarboxylase subunit beta [Pseudomonas s	3
1737		gi|71737741|ref|YP_272747.1| 16S ribosomal RNA methyltransferase RsmE [Pseudomo	3
1738		gi|71734161|ref|YP_272753.1| 5,10-methylenetetrahydrofolate reductase [Pseudomo	3
1739		gi|71736149|ref|YP_272790.1| Na+/proline, Na+/panthothenate symporter [Pseudomo	3
1740		gi|71736866|ref|YP_272801.1| response regulator/sensory box/GGDEF domain/EAL do	3
1741		gi|71736454|ref|YP_272820.1| hypothetical protein PSPPH_0518 [Pseudomonas syrin	3
1742		gi|71737314|ref|YP_272828.1| toluene tolerance protein [Pseudomonas syringae pv	3
1743		gi|71736192|ref|YP_272830.1| bifunctional heptose 7-phosphate kinase/heptose 1-	3
1744		gi|71737635|ref|YP_272845.1| hypothetical protein PSPPH_0543 [Pseudomonas syrin	3
1745		gi|71733439|ref|YP_272848.1| transporter [Pseudomonas syringae pv. phaseolicola	3
1746		gi|71734847|ref|YP_272855.1| hypothetical protein PSPPH_0553 [Pseudomonas syrin	3
1747		gi|71733293|ref|YP_272859.1| oligoribonuclease [Pseudomonas syringae pv. phaseo	3
1748		gi|71733822|ref|YP_272863.1| hypothetical protein PSPPH_0561 [Pseudomonas syrin	3
1749		gi|71735270|ref|YP_272869.1| HflK protein [Pseudomonas syringae pv. phaseolicol	3
1750		gi|71737416|ref|YP_272880.1| replicative DNA helicase [Pseudomonas syringae pv.	3
1751		gi|71737577|ref|YP_272893.1| high affinity branched-chain amino acid ABC transp	3
1752		gi|71734375|ref|YP_272902.1| cystathionine beta-lyase [Pseudomonas syringae pv.	3
1753		gi|71737408|ref|YP_272903.1| hypothetical protein PSPPH_0603 [Pseudomonas syrin	3
1754		gi|71733413|ref|YP_272925.1| multifunctional tRNA nucleotidyl transferase/2'3'-	3
1755		gi|71734655|ref|YP_272933.1| 4-hydroxythreonine-4-phosphate dehydrogenase [Pseu	3
1756		gi|71737252|ref|YP_272979.1| short chain dehydrogenase/reductase family oxidore	3
1757		gi|71735593|ref|YP_272988.1| exodeoxyribonuclease V subunit beta [Pseudomonas s	3
1758		gi|71733910|ref|YP_273017.1| type IV pilus biogenesis protein [Pseudomonas syri	3
1759		gi|71734552|ref|YP_273022.1| type IV pilus-associated protein [Pseudomonas syri	3
1760		gi|71735914|ref|YP_273056.1| response regulator/sensor histidine kinase [Pseudo	3
1761		gi|71737530|ref|YP_273096.1| HlyD family type I secretion membrane fusion prote	3
1762		gi|71735758|ref|YP_273108.1| trypsin domain-containing protein [Pseudomonas syr	3
1763		gi|71737385|ref|YP_273118.1| tellurium resistance protein TerD [Pseudomonas syr	3
1764		gi|71735171|ref|YP_273119.1| tellurium resistance protein TerE [Pseudomonas syr	3
1765		gi|71735260|ref|YP_273139.1| sensory box histidine kinase [Pseudomonas syringae	3
1766		gi|71738106|ref|YP_273143.1| hypothetical protein PSPPH_0862 [Pseudomonas syrin	3
1767		gi|71736257|ref|YP_273150.1| hypothetical protein PSPPH_0869 [Pseudomonas syrin	3
1768		gi|71737335|ref|YP_273152.1| hypothetical protein PSPPH_0871 [Pseudomonas syrin	3
1769		gi|71736153|ref|YP_273157.1| sulfite oxidase subunit YedY [Pseudomonas syringae	3
1770		gi|71733902|ref|YP_273165.1| hypothetical protein PSPPH_0889 [Pseudomonas syrin	3
1771		gi|71734687|ref|YP_273178.1| methyl-accepting chemotaxis protein [Pseudomonas s	3
1772		gi|71736243|ref|YP_273183.1| lipoprotein [Pseudomonas syringae pv. phaseolicola	3
1773		gi|71736395|ref|YP_273190.1| MotA/TolQ/ExbB proton channel family protein [Pseu	3
1774		gi|71734957|ref|YP_273191.1| phospholipase D family protein [Pseudomonas syring	3
1775		gi|71738147|ref|YP_273193.1| acetyltransferase [Pseudomonas syringae pv. phaseo	3
1776		gi|71738036|ref|YP_273196.1| hypothetical protein PSPPH_0921 [Pseudomonas syrin	3
1777		gi|71734876|ref|YP_273203.1| hypothetical protein PSPPH_0929 [Pseudomonas syrin	3
1778		gi|71733446|ref|YP_273227.1| lipopolysaccharide ABC export system, ATP-binding	3
1779		gi|71735843|ref|YP_273231.1| hypothetical protein PSPPH_0959 [Pseudomonas syrin	3
1780		gi|71738122|ref|YP_273250.1| hypothetical protein PSPPH_0978 [Pseudomonas syrin	3
1781		gi|71734124|ref|YP_273279.1| short chain dehydrogenase/reductase family oxidore	3
1782		gi|71737190|ref|YP_273284.1| hypothetical protein PSPPH_1013 [Pseudomonas syrin	3
1783		gi|71735635|ref|YP_273286.1| hypothetical protein PSPPH_1015 [Pseudomonas syrin	3
1784		gi|71733535|ref|YP_273295.1| homocysteine S-methyltransferase family protein [P	3
1785		gi|71733756|ref|YP_273309.1| amino acid transporter LysE [Pseudomonas syringae	3
1786		gi|71736878|ref|YP_273330.1| FAD/FMN-binding oxidoreductase [Pseudomonas syring	3
1787		gi|71736814|ref|YP_273361.1| sigma factor regulatory protein FecR/PupR family [	3
1788		gi|71735108|ref|YP_273367.1| D-isomer specific 2-hydroxyacid dehydrogenase fami	3
1789		gi|71737544|ref|YP_273383.1| alginate biosynthesis protein AlgK [Pseudomonas sy	3
1790		gi|71734898|ref|YP_273405.1| hypothetical protein PSPPH_1137 [Pseudomonas syrin	3
1791		gi|71734275|ref|YP_273411.1| hypothetical protein PSPPH_1143 [Pseudomonas syrin	3
1792		gi|71737173|ref|YP_273416.1| phage integrase family site specific recombinase [	3
1793		gi|71735994|ref|YP_273427.1| cold shock domain-contain protein [Pseudomonas syr	3
1794		gi|71735322|ref|YP_273444.1| phosphogluconate dehydratase [Pseudomonas syringae	3
1795		gi|71736664|ref|YP_273498.1| GntR family transcriptional regulator [Pseudomonas	3
1796		gi|71736900|ref|YP_273509.1| nitric oxide dioxygenase [Pseudomonas syringae pv.	3
1797		gi|71734621|ref|YP_273545.1| type III secretion component protein HrcQb [Pseudo	3
1798		gi|71733256|ref|YP_273553.1| RNA polymerase sigma factor HrpL [Pseudomonas syri	3
1799		gi|71737697|ref|YP_273568.1| scaffold protein [Pseudomonas syringae pv. phaseol	3
1800		gi|71734129|ref|YP_273573.1| hypothetical protein PSPPH_1315 [Pseudomonas syrin	3
1801		gi|71735921|ref|YP_273579.1| histidyl-tRNA synthetase [Pseudomonas syringae pv.	3
1802		gi|71737950|ref|YP_273603.1| mutT/nudix family protein [Pseudomonas syringae pv	3
1803		gi|71736133|ref|YP_273616.1| site-specific tyrosine recombinase XerD [Pseudomon	3
1804		gi|71734570|ref|YP_273632.1| hypothetical protein PSPPH_1375 [Pseudomonas syrin	3
1805		gi|71736024|ref|YP_273653.1| hypothetical protein PSPPH_1396 [Pseudomonas syrin	3
1806		gi|71733324|ref|YP_273692.1| hypothetical protein PSPPH_1436 [Pseudomonas syrin	3
1807		gi|71733215|ref|YP_273694.1| poly(beta-D-mannuronate) C5 epimerase 3 [Pseudomon	3
1808		gi|71733887|ref|YP_273716.1| sensor histidine kinase [Pseudomonas syringae pv.	3
1809		gi|71734662|ref|YP_273749.1| vacJ lipoprotein [Pseudomonas syringae pv. phaseol	3
1810		gi|71736064|ref|YP_273756.1| short chain dehydrogenase [Pseudomonas syringae pv	3
1811		gi|71737773|ref|YP_273763.1| asparagine synthase [Pseudomonas syringae pv. phas	3
1812		gi|71734260|ref|YP_273765.1| hypothetical protein PSPPH_1511 [Pseudomonas syrin	3
1813		gi|229221138|ref|YP_273797.2| malate dehydrogenase [Pseudomonas syringae pv. ph	3
1814		gi|71737318|ref|YP_273811.1| glutamine amidotransferase [Pseudomonas syringae p	3
1815		gi|71737092|ref|YP_273825.1| C4-dicarboxylate transport protein 3 [Pseudomonas	3
1816		gi|71734987|ref|YP_273833.1| hypothetical protein PSPPH_1585 [Pseudomonas syrin	3
1817		gi|71735711|ref|YP_273835.1| tail-specific protease [Pseudomonas syringae pv. p	3
1818		gi|71733607|ref|YP_273842.1| ABC transporter periplasmic substrate-binding prot	3
1819		gi|71736775|ref|YP_273857.1| dihydrodipicolinate synthetase family protein [Pse	3
1820		gi|71737808|ref|YP_273872.1| tetraacyldisaccharide 4'-kinase [Pseudomonas syrin	3
1821		gi|71734888|ref|YP_273881.1| 50S ribosomal protein L32 [Pseudomonas syringae pv	3
1822		gi|71735430|ref|YP_273889.1| thymidylate kinase [Pseudomonas syringae pv. phase	3
1823		gi|71733465|ref|YP_273896.1| hypothetical protein PSPPH_1653 [Pseudomonas syrin	3
1824		gi|71733977|ref|YP_273909.1| threonine dehydratase [Pseudomonas syringae pv. ph	3
1825		gi|71736396|ref|YP_273913.1| ACC deaminase/D-cysteine desulfhydrase family prot	3
1826		gi|71734635|ref|YP_273922.1| ABC transporter ATP-binding protein [Pseudomonas s	3
1827		gi|71733410|ref|YP_273925.1| hypothetical protein PSPPH_1685 [Pseudomonas syrin	3
1828		gi|71738157|ref|YP_273933.1| hypothetical protein PSPPH_1696 [Pseudomonas syrin	3
1829		gi|71735300|ref|YP_273944.1| ABC transporter periplasmic substrate-binding prot	3
1830		gi|71737247|ref|YP_273953.1| acetyltransferase [Pseudomonas syringae pv. phaseo	3
1831		gi|71737388|ref|YP_273964.1| methyl-accepting chemotaxis protein [Pseudomonas s	3
1832		gi|71733305|ref|YP_273985.1| non-ribosomal peptide synthetase [Pseudomonas syri	3
1833		gi|71733806|ref|YP_273997.1| AsnC family transcriptional regulator [Pseudomonas	3
1834		gi|71733729|ref|YP_274008.1| xanthine dehydrogenase, C-terminal subunit [Pseudo	3
1835		gi|71733903|ref|YP_274016.1| mechanosensitive ion channel family protein [Pseud	3
1836		gi|71734999|ref|YP_274047.1| methylthioribulose-1-phosphate dehydratase [Pseudo	3
1837		gi|71738149|ref|YP_274073.1| auxin-binding protein [Pseudomonas syringae pv. ph	3
1838		gi|71733984|ref|YP_274077.1| ISPsy24, transposase orfB [Pseudomonas syringae pv	3
1839		gi|71737413|ref|YP_274098.1| response regulator [Pseudomonas syringae pv. phase	3
1840		gi|71736740|ref|YP_274107.1| hypothetical protein PSPPH_1876 [Pseudomonas syrin	3
1841		gi|71736645|ref|YP_274124.1| Iron-regulated protein frpC [Pseudomonas syringae	3
1842		gi|71736222|ref|YP_274125.1| chorismate mutase family protein [Pseudomonas syri	3
1843		gi|71735193|ref|YP_274158.1| hypothetical protein PSPPH_1930 [Pseudomonas syrin	3
1844		gi|71738015|ref|YP_274162.1| NodT family outer membrane efflux lipoprotein [Pse	3
1845		gi|71733781|ref|YP_274171.1| hypothetical protein PSPPH_1947 [Pseudomonas syrin	3
1846		gi|71735392|ref|YP_274180.1| 2-dehydro-3-deoxygalactonate kinase [Pseudomonas s	3
1847		gi|71735961|ref|YP_274192.1| ompA family protein [Pseudomonas syringae pv. phas	3
1848		gi|71737423|ref|YP_274195.1| proteinase inhibitor [Pseudomonas syringae pv. pha	3
1849		gi|71734337|ref|YP_274232.1| outer membrane usher protein fimD [Pseudomonas syr	3
1850		gi|71735844|ref|YP_274242.1| sensor protein KdpD [Pseudomonas syringae pv. phas	3
1851		gi|71736662|ref|YP_274264.1| 2-dehydropantoate 2-reductase [Pseudomonas syringa	3
1852		gi|71733330|ref|YP_274278.1| AcnD-accessory protein PrpF [Pseudomonas syringae	3
1853		gi|71734718|ref|YP_274280.1| phosphoenolpyruvate synthase [Pseudomonas syringae	3
1854		gi|71736497|ref|YP_274299.1| CHASE domain-containing protein/sensory box histid	3
1855		gi|71737084|ref|YP_274324.1| 4-hydroxyphenylpyruvate dioxygenase [Pseudomonas s	3
1856		gi|71736306|ref|YP_274381.1| hypothetical protein PSPPH_2164 [Pseudomonas syrin	3
1857		gi|71737646|ref|YP_274388.1| general secretion pathway protein GspJ [Pseudomona	3
1858		gi|71736975|ref|YP_274467.1| lipoprotein [Pseudomonas syringae pv. phaseolicola	3
1859		gi|71735323|ref|YP_274479.1| TPR domain-containing protein [Pseudomonas syringa	3
1860		gi|71737258|ref|YP_274482.1| multidrug efflux RND transporter, membrane fusion	3
1861		gi|71737750|ref|YP_274488.1| ABC transporter protein, ATP binding component [Ps	3
1862		gi|71737305|ref|YP_274497.1| ABC transporter ATP-binding protein [Pseudomonas s	3
1863		gi|71734653|ref|YP_274499.1| nickel ABC transporter permease [Pseudomonas syrin	3
1864		gi|71737235|ref|YP_274507.1| LysR family transcriptional regulator [Pseudomonas	3
1865		gi|71736699|ref|YP_274512.1| hypothetical protein PSPPH_2307 [Pseudomonas syrin	3
1866		gi|71734009|ref|YP_274529.1| peptidyl-prolyl cis-trans isomerase C [Pseudomonas	3
1867		gi|71734495|ref|YP_274542.1| LacI family transcriptional regulator [Pseudomonas	3
1868		gi|71736570|ref|YP_274543.1| MocD [Pseudomonas syringae pv. phaseolicola 1448A]	3
1869		gi|71734777|ref|YP_274545.1| pyridine nucleotide-disulfide oxidoreductase domai	3
1870		gi|71736000|ref|YP_274549.1| amino acid ABC transporter permease [Pseudomonas s	3
1871		gi|71735805|ref|YP_274583.1| lipoprotein [Pseudomonas syringae pv. phaseolicola	3
1872		gi|71738046|ref|YP_274606.1| TetR family transcriptional regulator [Pseudomonas	3
1873		gi|71737863|ref|YP_274608.1| hypothetical protein PSPPH_2409 [Pseudomonas syrin	3
1874		gi|71734644|ref|YP_274620.1| transcriptional activator FtrA [Pseudomonas syring	3
1875		gi|71736993|ref|YP_274634.1| thiolase family protein [Pseudomonas syringae pv.	3
1876		gi|71738153|ref|YP_274645.1| urea amidolyase-like protein [Pseudomonas syringae	3
1877		gi|71736560|ref|YP_274648.1| outer membrane porin OprE [Pseudomonas syringae pv	3
1878		gi|71737475|ref|YP_274654.1| hypothetical protein PSPPH_2457 [Pseudomonas syrin	3
1879		gi|71735458|ref|YP_274665.1| tartrate transporter [Pseudomonas syringae pv. pha	3
1880		gi|71735248|ref|YP_274698.1| cation ABC transporter ATP-binding protein [Pseudo	3
1881		gi|71736961|ref|YP_274739.1| response regulator [Pseudomonas syringae pv. phase	3
1882		gi|71738019|ref|YP_274743.1| aldehyde oxidase and xanthine dehydrogenase family	3
1883		gi|71734980|ref|YP_274744.1| xanthine dehydrogenase accessory factor [Pseudomon	3
1884		gi|71733970|ref|YP_274787.1| D-mannonate oxidoreductase/xylulokinase [Pseudomon	3
1885		gi|71736744|ref|YP_274792.1| precorrin 6A synthase [Pseudomonas syringae pv. ph	3
1886		gi|71735484|ref|YP_274799.1| response regulator [Pseudomonas syringae pv. phase	3
1887		gi|71735812|ref|YP_274806.1| phosphotransferase family protein [Pseudomonas syr	3
1888		gi|71736685|ref|YP_274830.1| thiol peroxidase [Pseudomonas syringae pv. phaseol	3
1889		gi|71735550|ref|YP_274834.1| outer membrane efflux protein [Pseudomonas syringa	3
1890		gi|71733704|ref|YP_274887.1| peptide ABC transporter ATP-binding protein [Pseud	3
1891		gi|71736810|ref|YP_274897.1| ornithine aminotransferase [Pseudomonas syringae p	3
1892		gi|71734240|ref|YP_274903.1| pyruvate phosphate dikinase PEP/pyruvate binding s	3
1893		gi|71733590|ref|YP_274909.1| phospholysine phosphohistidine inorganic pyrophosp	3
1894		gi|71734293|ref|YP_274910.1| GntR family transcriptional regulator [Pseudomonas	3
1895		gi|71735703|ref|YP_274915.1| sorbitol dehydrogenase [Pseudomonas syringae pv. p	3
1896		gi|71736316|ref|YP_274922.1| TetR family transcriptional regulator [Pseudomonas	3
1897		gi|71736227|ref|YP_274923.1| hypothetical protein PSPPH_2734 [Pseudomonas syrin	3
1898		gi|71734238|ref|YP_274929.1| transmembrane protein [Pseudomonas syringae pv. ph	3
1899		gi|71735667|ref|YP_274931.1| ABC transporter periplasmic oligopeptide-binding p	3
1900		gi|71737223|ref|YP_274933.1| ABC transporter permease [Pseudomonas syringae pv.	3
1901		gi|71737674|ref|YP_274983.1| hypothetical protein PSPPH_2796 [Pseudomonas syrin	3
1902		gi|71735907|ref|YP_274985.1| ISPsy24, transposase orfB [Pseudomonas syringae pv	3
1903		gi|71735442|ref|YP_275016.1| IclR family transcriptional regulator [Pseudomonas	3
1904		gi|71737655|ref|YP_275020.1| hypothetical protein PSPPH_2836 [Pseudomonas syrin	3
1905		gi|71737203|ref|YP_275041.1| pyruvate dehydrogenase [Pseudomonas syringae pv. p	3
1906		gi|71736789|ref|YP_275047.1| amino acid transporter LysE [Pseudomonas syringae	3
1907		gi|71736466|ref|YP_275079.1| yersiniabactin non-ribosomal peptide synthetase [P	3
1908		gi|71736287|ref|YP_275088.1| multidrug resistance protein AcrA/AcrE family [Pse	3
1909		gi|71738033|ref|YP_275094.1| ammonium transporter [Pseudomonas syringae pv. pha	3
1910		gi|71737118|ref|YP_275103.1| LysR family transcriptional regulator [Pseudomonas	3
1911		gi|71736603|ref|YP_275105.1| hypothetical protein PSPPH_2924 [Pseudomonas syrin	3
1912		gi|71735502|ref|YP_275126.1| hypothetical protein PSPPH_2945 [Pseudomonas syrin	3
1913		gi|71734869|ref|YP_275135.1| hypothetical protein PSPPH_2954 [Pseudomonas syrin	3
1914		gi|71738107|ref|YP_275154.1| NtaA/SnaA/SoxA family monooxygenase [Pseudomonas s	3
1915		gi|71735864|ref|YP_275171.1| TonB-dependent receptor [Pseudomonas syringae pv.	3
1916		gi|71734715|ref|YP_275176.1| PAP2 superfamily protein [Pseudomonas syringae pv.	3
1917		gi|71734984|ref|YP_275180.1| dipeptide ABC transporter permease DppB [Pseudomon	3
1918		gi|71734887|ref|YP_275189.1| U32 family peptidase [Pseudomonas syringae pv. pha	3
1919		gi|71737024|ref|YP_275192.1| alpha/beta fold family hydrolase [Pseudomonas syri	3
1920		gi|71733397|ref|YP_275196.1| phosphate ABC transporter permease PstC [Pseudomon	3
1921		gi|71737856|ref|YP_275245.1| N-methyltryptophan oxidase [Pseudomonas syringae p	3
1922		gi|71737139|ref|YP_275262.1| outer-membrane lipoprotein carrier protein [Pseudo	3
1923		gi|71737241|ref|YP_275274.1| adenylosuccinate lyase [Pseudomonas syringae pv. p	3
1924		gi|71736463|ref|YP_275275.1| ycfD protein [Pseudomonas syringae pv. phaseolicol	3
1925		gi|71736358|ref|YP_275299.1| lipoprotein [Pseudomonas syringae pv. phaseolicola	3
1926		gi|71737731|ref|YP_275316.1| capsular polysaccharide biosynthesis protein [Pseu	3
1927		gi|71733358|ref|YP_275327.1| TonB-dependent siderophore receptor [Pseudomonas s	3
1928		gi|71734242|ref|YP_275330.1| alkanesulfonate monooxygenase family protein [Pseu	3
1929		gi|71737776|ref|YP_275338.1| monovalent cation/H+ antiporter subunit F [Pseudom	3
1930		gi|71736581|ref|YP_275350.1| myo-inositol 2-dehydrogenase [Pseudomonas syringae	3
1931		gi|71736782|ref|YP_275359.1| cytochrome b561 [Pseudomonas syringae pv. phaseoli	3
1932		gi|71733216|ref|YP_275364.1| cell division inhibitor [Pseudomonas syringae pv.	3
1933		gi|71737910|ref|YP_275367.1| DNA topoisomerase I [Pseudomonas syringae pv. phas	3
1934		gi|71737566|ref|YP_275380.1| LuxR family DNA-binding response regulator [Pseudo	3
1935		gi|71737398|ref|YP_275403.1| hypothetical protein PSPPH_3243 [Pseudomonas syrin	3
1936		gi|71735274|ref|YP_275415.1| glcG protein [Pseudomonas syringae pv. phaseolicol	3
1937		gi|71733441|ref|YP_275416.1| hypothetical protein PSPPH_3256 [Pseudomonas syrin	3
1938		gi|71733673|ref|YP_275423.1| acetyltransferase [Pseudomonas syringae pv. phaseo	3
1939		gi|71736165|ref|YP_275459.1| HlyD family secretion protein [Pseudomonas syringa	3
1940		gi|71736716|ref|YP_275463.1| sulfate ABC transporter periplasmic sulfate-bindin	3
1941		gi|71733594|ref|YP_275474.1| hypothetical protein PSPPH_3315 [Pseudomonas syrin	3
1942		gi|71733699|ref|YP_275482.1| aldehyde dehydrogenase family protein [Pseudomonas	3
1943		gi|71737040|ref|YP_275499.1| VOMI family protein [Pseudomonas syringae pv. phas	3
1944		gi|71737980|ref|YP_275514.1| ParA family protein [Pseudomonas syringae pv. phas	3
1945		gi|71736661|ref|YP_275538.1| flagellum-specific ATP synthase [Pseudomonas syrin	3
1946		gi|71733829|ref|YP_275542.1| flagellar hook-basal body protein FliE [Pseudomona	3
1947		gi|71735751|ref|YP_275560.1| flagellar basal body rod protein FlgF [Pseudomonas	3
1948		gi|71736947|ref|YP_275577.1| glutamine synthetase [Pseudomonas syringae pv. pha	3
1949		gi|71735573|ref|YP_275586.1| response regulator/TPR domain-containing protein [	3
1950		gi|71737848|ref|YP_275594.1| sodium/solute symporter [Pseudomonas syringae pv.	3
1951		gi|71736037|ref|YP_275600.1| hypothetical protein PSPPH_3444 [Pseudomonas syrin	3
1952		gi|71733560|ref|YP_275657.1| hypothetical protein PSPPH_3506 [Pseudomonas syrin	3
1953		gi|71737528|ref|YP_275659.1| aspartate kinase [Pseudomonas syringae pv. phaseol	3
1954		gi|71738032|ref|YP_275666.1| succinylglutamic semialdehyde dehydrogenase [Pseud	3
1955		gi|71734527|ref|YP_275677.1| hypothetical protein PSPPH_3529 [Pseudomonas syrin	3
1956		gi|71734246|ref|YP_275685.1| hypothetical protein PSPPH_3537 [Pseudomonas syrin	3
1957		gi|71734340|ref|YP_275699.1| nitroreductase family protein [Pseudomonas syringa	3
1958		gi|71734447|ref|YP_275718.1| exonuclease SbcC [Pseudomonas syringae pv. phaseol	3
1959		gi|71737135|ref|YP_275721.1| hypothetical protein PSPPH_3573 [Pseudomonas syrin	3
1960		gi|71737935|ref|YP_275736.1| glutathionylspermidine synthase family protein [Ps	3
1961		gi|71733747|ref|YP_275760.1| rhodanese-like domain-containing protein [Pseudomo	3
1962		gi|71736636|ref|YP_275763.1| S/N-oxide reductase, molybdopterin guanine dinucle	3
1963		gi|71735958|ref|YP_275765.1| LysR family transcriptional regulator [Pseudomonas	3
1964		gi|71738131|ref|YP_275779.1| 3-deoxy-7-phosphoheptulonate synthase [Pseudomonas	3
1965		gi|71736838|ref|YP_275784.1| group 1 glycosyl transferase family protein [Pseud	3
1966		gi|71734032|ref|YP_275788.1| organic hydroperoxide resistance protein [Pseudomo	3
1967		gi|71737450|ref|YP_275791.1| hypothetical protein PSPPH_3649 [Pseudomonas syrin	3
1968		gi|71734520|ref|YP_275796.1| TetR family transcriptional regulator [Pseudomonas	3
1969		gi|71734216|ref|YP_275837.1| nicotinate-nucleotide--dimethylbenzimidazole phosp	3
1970		gi|71737037|ref|YP_275848.1| NAD-dependent deacetylase [Pseudomonas syringae pv	3
1971		gi|71735302|ref|YP_275881.1| ISPsy24, transposase orfB [Pseudomonas syringae pv	3
1972		gi|71737432|ref|YP_275887.1| ribonucleotide-diphosphate reductase subunit beta	3
1973		gi|71735619|ref|YP_275896.1| diaminobutyrate--2-oxoglutarate aminotransferase [	3
1974		gi|71738104|ref|YP_275914.1| Holliday junction resolvase [Pseudomonas syringae	3
1975		gi|71734830|ref|YP_275948.1| lipoprotein [Pseudomonas syringae pv. phaseolicola	3
1976		gi|71737038|ref|YP_275952.1| 2-C-methyl-D-erythritol 2,4-cyclodiphosphate synth	3
1977		gi|71736745|ref|YP_275966.1| UDP-N-acetylglucosamine acyltransferase [Pseudomon	3
1978		gi|71734677|ref|YP_275968.1| UDP-3-O-[3-hydroxymyristoyl] glucosamine N-acyltra	3
1979		gi|71734174|ref|YP_275976.1| uridylate kinase [Pseudomonas syringae pv. phaseol	3
1980		gi|71737501|ref|YP_276037.1| glycerol-3-phosphate regulon repressor [Pseudomona	3
1981		gi|71733986|ref|YP_276058.1| hypothetical protein PSPPH_3922 [Pseudomonas syrin	3
1982		gi|71737447|ref|YP_276073.1| hypothetical protein PSPPH_3937 [Pseudomonas syrin	3
1983		gi|71733200|ref|YP_276082.1| DNA repair protein RecO [Pseudomonas syringae pv.	3
1984		gi|71735285|ref|YP_276095.1| glycine cleavage T-protein (aminomethyl transferas	3
1985		gi|71737681|ref|YP_276099.1| TctC protein [Pseudomonas syringae pv. phaseolicol	3
1986		gi|71737959|ref|YP_276115.1| ribosomal small subunit pseudouridine synthase A [	3
1987		gi|71735056|ref|YP_276129.1| hypothetical protein PSPPH_3998 [Pseudomonas syrin	3
1988		gi|71737027|ref|YP_276140.1| EmrB/QacA family drug resistance transporter [Pseu	3
1989		gi|71738013|ref|YP_276154.1| formyltetrahydrofolate deformylase [Pseudomonas sy	3
1990		gi|71737440|ref|YP_276156.1| exonuclease I [Pseudomonas syringae pv. phaseolico	3
1991		gi|71733275|ref|YP_276157.1| RDD domain-containing protein [Pseudomonas syringa	3
1992		gi|71737001|ref|YP_276166.1| lipoprotein [Pseudomonas syringae pv. phaseolicola	3
1993		gi|71736912|ref|YP_276167.1| pyruvate kinase [Pseudomonas syringae pv. phaseoli	3
1994		gi|71736261|ref|YP_276176.1| YceI-like family protein [Pseudomonas syringae pv.	3
1995		gi|71734172|ref|YP_276188.1| chromosome replication initiation inhibitor protei	3
1996		gi|71735938|ref|YP_276202.1| PAP2 superfamily protein [Pseudomonas syringae pv.	3
1997		gi|71736946|ref|YP_276231.1| cell division protein FtsW [Pseudomonas syringae p	3
1998		gi|71733572|ref|YP_276234.1| UDP-N-acetylmuramoyl-tripeptide--D-alanyl-D-alanin	3
1999		gi|71733718|ref|YP_276247.1| 30S ribosomal protein S9 [Pseudomonas syringae pv.	3
[truncated: 3,134 more rows]
