# Supplementary material for: Functional and Computational Analysis of Amino Acid Patterns Predictive of Type III Secretion System Substrates in Pseudomonas syringae
Source: PLoS One. 2012 Apr 27;7(4):e36038. doi: 10.1371/journal.pone.0036038 (PMC3338616; doi:10.1371/journal.pone.0036038)
Supplement: Table S4 — TEREE algorithm scores for annotated coding regions in S. e. Typhimurium LT2. (XLSX) [file pone.0036038.s004.xlsx]

## Sheet: Sheet1
RANK	Validated T3SS substrates	Definition	TEREE Score
1	SipC	gi|16766190|ref|NP_461805.1| translocation machinery component [Salmonella ente	-35
2	InvE	gi|16766203|ref|NP_461818.1| invasion protein [Salmonella enterica subsp. enter	-29
3	extracellular flagellum component	gi|16764528|ref|NP_460143.1| anti-sigma28 factor FlgM [Salmonella enterica subs	-27
4		gi|39546393|ref|NP_463087.2| outer membrane protein [Salmonella enterica subsp.	-25
5		gi|16767305|ref|NP_462920.1| cytoplasmic protein [Salmonella enterica subsp. en	-23
6		gi|16765837|ref|NP_461452.1| intimin-like protein [Salmonella enterica subsp. e	-21
7	SseG	gi|16764755|ref|NP_460370.1| secreted effector protein [Salmonella enterica sub	-20
8	SseF	gi|16764754|ref|NP_460369.1| secreted effector protein [Salmonella enterica sub	-19
9		gi|16764906|ref|NP_460521.1| acid-resistance protein [Salmonella enterica subsp	-19
10	SopE2	gi|16765196|ref|NP_460811.1| type III-secreted effector protein [Salmonella ent	-19
11	extracellular flagellum component	gi|16765297|ref|NP_460912.1| flagellin [Salmonella enterica subsp. enterica ser	-19
12		gi|16765850|ref|NP_461465.1| anaerobic dimethylsulfoxide reductase [Salmonella	-19
13	extracellular flagellum component	gi|16766083|ref|NP_461698.1| flagellin [Salmonella enterica subsp. enterica ser	-19
14		gi|16767373|ref|NP_462988.1| periplasmic protein [Salmonella enterica subsp. en	-19
15		gi|16767667|ref|NP_463282.1| NAD-dependent aldehyde dehydrogenase [Salmonella e	-19
16		gi|17233412|ref|NP_490514.1| hypothetical protein PSLT024 [Salmonella typhimuri	-19
17		gi|16764794|ref|NP_460409.1| anhydro-N-acetylmuramic acid kinase [Salmonella en	-18
18	SipD	gi|16766189|ref|NP_461804.1| translocation machinery component [Salmonella ente	-17
19		gi|16766671|ref|NP_462286.1| oxidoreductase [Salmonella enterica subsp. enteric	-17
20		gi|16766862|ref|NP_462477.1| zinc/cadmium/mercury/lead-transporting ATPase [Sal	-17
21		gi|16767168|ref|NP_462783.1| D-ribose transporter subunit RbsB [Salmonella ente	-17
22		gi|16767609|ref|NP_463224.1| FtsH protease regulator HflK [Salmonella enterica	-17
23		gi|16763672|ref|NP_459287.1| cytoplasmic protein [Salmonella enterica subsp. en	-16
24		gi|16763846|ref|NP_459461.1| hypothetical protein STM0465 [Salmonella enterica	-16
25		gi|16764120|ref|NP_459735.1| tol-pal system protein YbgF [Salmonella enterica s	-15
26	PipA	gi|16764445|ref|NP_460060.1| pathogenicity island-encoded protein A [Salmonella	-15
27	extracellular flagellum component	gi|16764540|ref|NP_460155.1| flagellar hook-associated protein FlgL [Salmonella	-15
28		gi|16764594|ref|NP_460209.1| cytoplasmic protein [Salmonella enterica subsp. en	-15
29		gi|16764669|ref|NP_460284.1| hydroperoxidase II [Salmonella enterica subsp. ent	-15
30		gi|161353602|ref|NP_460445.2| acid shock protein precursor [Salmonella enterica	-15
31		gi|16765011|ref|NP_460626.1| hypothetical protein STM1668 [Salmonella enterica	-15
32		gi|16765025|ref|NP_460640.1| thiol peroxidase [Salmonella enterica subsp. enter	-15
33		gi|39980857|ref|NP_951053.1| hypothetical protein STM2804.1n [Salmonella enteri	-15
34		gi|16766122|ref|NP_461737.1| glycine betaine transporter periplasmic subunit [S	-15
35		gi|16766231|ref|NP_461846.1| lipoprotein NlpD [Salmonella enterica subsp. enter	-15
36		gi|16766657|ref|NP_462272.1| periplasmic protein [Salmonella enterica subsp. en	-15
37		gi|16767348|ref|NP_462963.1| periplasmic protein [Salmonella enterica subsp. en	-15
38		gi|16767786|ref|NP_463401.1| hypothetical protein STM4542 [Salmonella enterica	-15
39		gi|16765864|ref|NP_461479.1| DNA-binding transcriptional regulator IscR [Salmon	-14
40		gi|16766855|ref|NP_462470.1| cell division protein FtsX [Salmonella enterica su	-14
41		gi|16763402|ref|NP_459017.1| molecular chaperone DnaK [Salmonella enterica subs	-13
42		gi|16763487|ref|NP_459102.1| DNA polymerase II [Salmonella enterica subsp. ente	-13
43		gi|16763847|ref|NP_459462.1| methyltransferase [Salmonella enterica subsp. ente	-13
44		gi|16764139|ref|NP_459754.1| galactose-1-phosphate uridylyltransferase [Salmone	-13
45		gi|16764478|ref|NP_460093.1| cytoplasmic protein [Salmonella enterica subsp. en	-13
46		gi|16764659|ref|NP_460274.1| periplasmic protein [Salmonella enterica subsp. en	-13
47		gi|16764715|ref|NP_460330.1| oxidase [Salmonella enterica subsp. enterica serov	-13
48	SsaI	gi|16764758|ref|NP_460373.1| type III secretion system apparatus protein [Salmo	-13
49		gi|16764843|ref|NP_460458.1| dimethyl sulphoxide reductase [Salmonella enterica	-13
50		gi|16765072|ref|NP_460687.1| cytoplasmic protein [Salmonella enterica subsp. en	-13
51		gi|16765189|ref|NP_460804.1| inner membrane protein [Salmonella enterica subsp.	-13
52		gi|16765275|ref|NP_460890.1| outer membrane lipoprotein [Salmonella enterica su	-13
53		gi|16765321|ref|NP_460936.1| cytoplasmic protein [Salmonella enterica subsp. en	-13
54	SopA	gi|16765396|ref|NP_461011.1| secreted effector protein [Salmonella enterica sub	-13
55		gi|16765533|ref|NP_461148.1| endonuclease IV [Salmonella enterica subsp. enteri	-13
56		gi|16765618|ref|NP_461233.1| galactonate dehydratase [Salmonella enterica subsp	-13
57		gi|16765957|ref|NP_461572.1| SoxR reducing system protein RseC [Salmonella ente	-13
58		gi|16766168|ref|NP_461783.1| ATP-binding protein [Salmonella enterica subsp. en	-13
59	OrgC	gi|16766174|ref|NP_461789.1| cytoplasmic protein [Salmonella enterica subsp. en	-13
60		gi|16766333|ref|NP_461948.1| Ail/OmpX-like protein [Salmonella enterica subsp.	-13
61		gi|16766562|ref|NP_462177.1| transglycosylase [Salmonella enterica subsp. enter	-13
62		gi|16766603|ref|NP_462218.1| transcriptional regulator [Salmonella enterica sub	-13
63		gi|16766858|ref|NP_462473.1| 16S rRNA m(2)G966-methyltransferase [Salmonella en	-13
64		gi|16767230|ref|NP_462845.1| homoserine/homoserine lactone efflux protein [Salm	-13
65		gi|308065944|ref|NP_462861.3| DNase TatD [Salmonella enterica subsp. enterica s	-13
66		gi|16767437|ref|NP_463052.1| transcriptional repressor IclR [Salmonella enteric	-13
67		gi|39546315|ref|NP_460323.2| acetyl-CoA/acetoacetyl-CoA transferase beta subuni	-12
68	SseC	gi|16764750|ref|NP_460365.1| translocation machinery component [Salmonella ente	-12
69		gi|16765337|ref|NP_460952.1| endoprotease [Salmonella enterica subsp. enterica	-12
70		gi|16766262|ref|NP_461877.1| GDP/GTP pyrophosphokinase [Salmonella enterica sub	-12
71		gi|16763688|ref|NP_459303.1| cytoplasmic protein [Salmonella enterica subsp. en	-11
72		gi|16764147|ref|NP_459762.1| molybdate transporter ATP-binding protein [Salmone	-11
73	SlrP	gi|16764163|ref|NP_459778.1| leucine-rich repeat-containing protein [Salmonella	-11
74		gi|16764236|ref|NP_459851.1| nitroreductase A [Salmonella enterica subsp. enter	-11
75		gi|16764409|ref|NP_460024.1| tail fiber protein [Phage Gifsy-2]	-11
76	SopB	gi|16764449|ref|NP_460064.1| secreted effector protein [Salmonella enterica sub	-11
77		gi|16764532|ref|NP_460147.1| flagellar basal body rod modification protein [Sal	-11
78		gi|16764592|ref|NP_460207.1| ribosomal large subunit pseudouridine synthase [Sa	-11
79		gi|16764813|ref|NP_460428.1| mannose-6-phosphate isomerase [Salmonella enterica	-11
80		gi|16764858|ref|NP_460473.1| cytoplasmic protein [Salmonella enterica subsp. en	-11
81		gi|16765008|ref|NP_460623.1| transcriptional regulator [Salmonella enterica sub	-11
82		gi|308065964|ref|NP_460724.2| hypothetical protein STM1768 [Salmonella enterica	-11
83		gi|16765144|ref|NP_460759.1| D-amino acid dehydrogenase small subunit [Salmonel	-11
84		gi|16765345|ref|NP_460960.1| hypothetical protein STM2015 [Salmonella enterica	-11
85		gi|16765482|ref|NP_461097.1| outer membrane protein [Salmonella enterica subsp.	-11
86		gi|16765498|ref|NP_461113.1| D-alanyl-D-alanine endopeptidase [Salmonella enter	-11
87		gi|16765543|ref|NP_461158.1| outer membrane lipoprotein [Salmonella enterica su	-11
88		gi|16765642|ref|NP_461257.1| hypothetical protein STM2315 [Salmonella enterica	-11
89		gi|16765657|ref|NP_461272.1| NADH dehydrogenase transcriptional repressor [Salm	-11
90		gi|16765698|ref|NP_461313.1| flagella biosynthesis regulator [Salmonella enteri	-11
91		gi|16765751|ref|NP_461366.1| PTS system phosphohistidinoprotein-hexose phosphot	-11
92		gi|16765909|ref|NP_461524.1| tail fiber-like protein [Salmonella enterica subsp	-11
93		gi|16765929|ref|NP_461544.1| terminase-like large protein [Salmonella enterica	-11
94	GogA	gi|16765935|ref|NP_461550.1| hypothetical protein STM2614 [Phage Gifsy-1]	-11
95		gi|16765968|ref|NP_461583.1| methyltransferase [Salmonella enterica subsp. ente	-11
96		gi|16766004|ref|NP_461619.1| outer membrane efflux protein [Salmonella enterica	-11
97		gi|16766121|ref|NP_461736.1| glycine betaine transporter membrane protein [Salm	-11
98		gi|16766181|ref|NP_461796.1| invasion protein regulatory protein [Salmonella en	-11
99		gi|16766274|ref|NP_461889.1| nucleotide binding [Salmonella enterica subsp. ent	-11
100		gi|16766613|ref|NP_462228.1| lipopolysaccharide transport periplasmic protein L	-11
101		gi|16766819|ref|NP_462434.1| transcriptional regulator [Salmonella enterica sub	-11
102		gi|16766831|ref|NP_462446.1| dehydrogenase [Salmonella enterica subsp. enterica	-11
103		gi|16767150|ref|NP_462765.1| F0F1 ATP synthase subunit gamma [Salmonella enteri	-11
104		gi|16767487|ref|NP_463102.1| LexA repressor [Salmonella enterica subsp. enteric	-11
105		gi|17233474|ref|NP_490501.1| resistance to complement killing [Salmonella typhi	-11
106		gi|17233497|ref|NP_490536.1| putative carbonic anhydrase [Salmonella typhimuriu	-11
107		gi|16763395|ref|NP_459010.1| hypothetical protein STM0005 [Salmonella enterica	-10
108		gi|16763422|ref|NP_459037.1| arylsulfatase [Salmonella enterica subsp. enterica	-10
109		gi|16764068|ref|NP_459683.1| phosphoglucomutase [Salmonella enterica subsp. ent	-10
110		gi|16764195|ref|NP_459810.1| outer membrane protein X [Salmonella enterica subs	-10
111		gi|16764372|ref|NP_459987.1| regulatory protein [Salmonella enterica subsp. ent	-10
112		gi|16764732|ref|NP_460347.1| regulatory protein [Salmonella enterica subsp. ent	-10
113		gi|16765012|ref|NP_460627.1| invasin-like protein [Salmonella enterica subsp. e	-10
114		gi|16765045|ref|NP_460660.1| cytoplasmic protein [Salmonella enterica subsp. en	-10
115		gi|16765298|ref|NP_460913.1| flagellar capping protein [Salmonella enterica sub	-10
116		gi|16765724|ref|NP_461339.1| phosphoglycerate transport regulatory protein prec	-10
117		gi|16765948|ref|NP_461563.1| regulatory protein [Phage Gifsy-1]	-10
118		gi|16767485|ref|NP_463100.1| glycerol-3-phosphate acyltransferase [Salmonella e	-10
119		gi|17233406|ref|NP_490495.1| replication protein [Salmonella typhimurium LT2]	-10
120	SpvB	gi|17233491|ref|NP_490529.1| hydrophilic protein [Salmonella typhimurium LT2]	-10
121		gi|17233437|ref|NP_490556.1| putative ParB-like nuclease [Salmonella typhimuriu	-10
122		gi|16763397|ref|NP_459012.1| transaldolase B [Salmonella enterica subsp. enteri	-9
123		gi|16763418|ref|NP_459033.1| thiol-disulfide isomerase [Salmonella enterica sub	-9
124		gi|16763472|ref|NP_459087.1| secreted protein [Salmonella enterica subsp. enter	-9
125		gi|16763591|ref|NP_459206.1| outer membrane protein [Salmonella enterica subsp.	-9
126		gi|16763598|ref|NP_459213.1| deoxyguanosinetriphosphate triphosphohydrolase [Sa	-9
127		gi|16763641|ref|NP_459256.1| hypothetical protein STM0258 [Salmonella enterica	-9
128		gi|16763660|ref|NP_459275.1| cytoplasmic protein [Salmonella enterica subsp. en	-9
129		gi|16763714|ref|NP_459329.1| cytoplasmic protein [Salmonella enterica subsp. en	-9
130		gi|39546293|ref|NP_459345.2| outer membrane efflux-like protein [Salmonella ent	-9
131		gi|16763749|ref|NP_459364.1| methylcitrate synthase [Salmonella enterica subsp.	-9
132		gi|16763896|ref|NP_459511.1| DNA-binding transcriptional repressor AllR [Salmon	-9
133		gi|16763905|ref|NP_459520.1| glycerate kinase II [Salmonella enterica subsp. en	-9
134		gi|16763926|ref|NP_459541.1| outer membrane usher protein precursor [Salmonella	-9
135		gi|16763929|ref|NP_459544.1| transcriptional regulator FimZ [Salmonella enteric	-9
136		gi|16764052|ref|NP_459667.1| N-acetylglucosamine operon transcriptional repress	-9
137		gi|16764067|ref|NP_459682.1| replication initiation regulator SeqA [Salmonella	-9
138		gi|16764218|ref|NP_459833.1| electron transfer protein alpha subunit [Salmonell	-9
139		gi|16764270|ref|NP_459885.1| hypothetical protein STM0908 [Salmonella phage Fel	-9
140		gi|16764288|ref|NP_459903.1| minor tail protein [Salmonella phage Fels-1]	-9
141		gi|16764312|ref|NP_459927.1| cytoplasmic protein [Salmonella enterica subsp. en	-9
142	GtgE	gi|16764414|ref|NP_460029.1| hypothetical protein STM1055 [Salmonella enterica	-9
143		gi|16764438|ref|NP_460053.1| heat shock protein HspQ [Salmonella enterica subsp	-9
144		gi|16764622|ref|NP_460237.1| cytoplasmic protein [Salmonella enterica subsp. en	-9
145		gi|39546316|ref|NP_460352.2| response regulator [Salmonella enterica subsp. ent	-9
146		gi|16764873|ref|NP_460488.1| outer membrane protein [Salmonella enterica subsp.	-9
147		gi|16764878|ref|NP_460493.1| hydrogenase [Salmonella enterica subsp. enterica s	-9
148		gi|16764882|ref|NP_460497.1| Ni/Fe hydrogenase 1 b-type cytochrome subunit [Sal	-9
149		gi|39546322|ref|NP_460532.2| cytoplasmic protein [Salmonella enterica subsp. en	-9
150		gi|16765013|ref|NP_460628.1| lipoprotein [Salmonella enterica subsp. enterica s	-9
151		gi|16765178|ref|NP_460793.1| cold shock-like protein CspC [Salmonella enterica	-9
152		gi|16765223|ref|NP_460838.1| hypothetical protein STM1881 [Salmonella enterica	-9
153		gi|16765229|ref|NP_460844.1| DNA-binding transcriptional regulator HexR [Salmon	-9
154		gi|16765306|ref|NP_460921.1| flagellar hook-basal body protein FliE [Salmonella	-9
155		gi|16765308|ref|NP_460923.1| flagellar motor switch protein G [Salmonella enter	-9
156		gi|39980856|ref|NP_951052.1| hypothetical protein STM2011.1n [Salmonella enteri	-9
157		gi|16765372|ref|NP_460987.1| propanediol dehydratase small subunit [Salmonella	-9
158	SseK1	gi|16765466|ref|NP_461081.1| cytoplasmic protein [Salmonella enterica subsp. en	-9
159		gi|16765502|ref|NP_461117.1| multidrug resistance outer membrane protein MdtQ [	-9
160		gi|16765549|ref|NP_461164.1| hypothetical protein STM2220 [Salmonella enterica	-9
161		gi|16765561|ref|NP_461176.1| cytoplasmic protein [Salmonella enterica subsp. en	-9
162		gi|16765665|ref|NP_461280.1| phosphate acetyltransferase [Salmonella enterica s	-9
163		gi|16765673|ref|NP_461288.1| NTP pyrophosphohydrolase [Salmonella enterica subs	-9
164		gi|16765777|ref|NP_461392.1| ethanolamine ammonia-lyase small subunit [Salmonel	-9
165		gi|16765843|ref|NP_461458.1| 4-hydroxy-3-methylbut-2-en-1-yl diphosphate syntha	-9
166		gi|16765872|ref|NP_461487.1| hypothetical protein STM2552 [Salmonella enterica	-9
167		gi|16765892|ref|NP_461507.1| DNA-binding transcriptional regulator [Salmonella	-9
168		gi|16766007|ref|NP_461622.1| late control-like protein [Salmonella enterica sub	-9
169		gi|228960703|ref|NP_461704.2| outer membrane receptor FepA [Salmonella enterica	-9
170		gi|16766188|ref|NP_461803.1| secreted effector protein [Salmonella enterica sub	-9
171		gi|16766306|ref|NP_461921.1| dinucleoside polyphosphate hydrolase [Salmonella e	-9
172		gi|16766457|ref|NP_462072.1| oxidoreductase [Salmonella enterica subsp. enteric	-9
173		gi|16766656|ref|NP_462271.1| outer membrane protein [Salmonella enterica subsp.	-9
174		gi|16766744|ref|NP_462359.1| FKBP-type peptidyl-prolyl cis-trans isomerase [Sal	-9
175		gi|16767200|ref|NP_462815.1| TDP-4-oxo-6-deoxy-D-glucose transaminase [Salmonel	-9
176		gi|16767304|ref|NP_462919.1| inner membrane lipoprotein [Salmonella enterica su	-9
177		gi|16767386|ref|NP_463001.1| N-acetyl-gamma-glutamyl-phosphate reductase [Salmo	-9
178		gi|16767425|ref|NP_463040.1| inner membrane protein [Salmonella enterica subsp.	-9
179		gi|16767482|ref|NP_463097.1| maltose regulon periplasmic protein [Salmonella en	-9
180		gi|16767836|ref|NP_463451.1| fimbrial chaperone [Salmonella enterica subsp. ent	-9
181		gi|17233416|ref|NP_490520.1| putative cytoplasmic protein [Salmonella typhimuri	-9
182		gi|17233458|ref|NP_490578.1| conjugal transfer pilus assembly protein TrbC [Sal	-9
183		gi|16763527|ref|NP_459142.1| nucleoside triphosphate pyrophosphohydrolase [Salm	-8
184		gi|16764679|ref|NP_460294.1| outer membrane protein [Salmonella enterica subsp.	-8
185		gi|16765199|ref|NP_460814.1| cytoplasmic protein [Salmonella enterica subsp. en	-8
186		gi|39546336|ref|NP_945165.1| hypothetical protein STM2209.1c [Salmonella enteri	-8
187		gi|16765721|ref|NP_461336.1| outer membrane protease [Salmonella enterica subsp	-8
188		gi|16766955|ref|NP_462570.1| chemotaxis protein [Salmonella enterica subsp. ent	-8
189		gi|16767080|ref|NP_462695.1| acetolactate synthase catalytic subunit [Salmonell	-8
190		gi|16767363|ref|NP_462978.1| outer membrane lipoprotein [Salmonella enterica su	-8
191		gi|16767385|ref|NP_463000.1| acetylornithine deacetylase [Salmonella enterica s	-8
192		gi|16767550|ref|NP_463165.1| fumarase B [Salmonella enterica subsp. enterica se	-8
193		gi|16767596|ref|NP_463211.1| hypothetical protein STM4347 [Salmonella enterica	-8
194		gi|17233450|ref|NP_490570.1| conjugal transfer protein TraV [Salmonella typhimu	-8
195		gi|16763404|ref|NP_459019.1| transcriptional regulator [Salmonella enterica sub	-7
196		gi|16763571|ref|NP_459186.1| pantoate--beta-alanine ligase [Salmonella enterica	-7
197		gi|16763630|ref|NP_459245.1| peptidyl-tRNA hydrolase domain protein [Salmonella	-7
198		gi|16763643|ref|NP_459258.1| membrane-bound lytic murein transglycosylase D [Sa	-7
199		gi|16763726|ref|NP_459341.1| outer membrane protein [Salmonella enterica subsp.	-7
200		gi|39546294|ref|NP_459347.2| cation efflux pump [Salmonella enterica subsp. ent	-7
201		gi|16763757|ref|NP_459372.1| outer membrane lipoprotein [Salmonella enterica su	-7
202		gi|16763789|ref|NP_459404.1| hypothetical protein STM0409 [Salmonella enterica	-7
203		gi|16763809|ref|NP_459424.1| 2-aminoethylphosphonate transporter [Salmonella en	-7
204		gi|16763871|ref|NP_459486.1| inosine-guanosine kinase [Salmonella enterica subs	-7
205		gi|16763925|ref|NP_459540.1| periplasmic chaperone [Salmonella enterica subsp.	-7
206		gi|16763944|ref|NP_459559.1| DNA repair ATPase [Salmonella enterica subsp. ente	-7
207		gi|16763980|ref|NP_459595.1| aminotransferase [Salmonella enterica subsp. enter	-7
208		gi|16764021|ref|NP_459636.1| threonine-phosphate decarboxylase [Salmonella ente	-7
209		gi|16764070|ref|NP_459685.1| putrescine transporter [Salmonella enterica subsp.	-7
210		gi|16764093|ref|NP_459708.1| ABC-type polysaccharide/polyol phosphate transport	-7
211		gi|16764114|ref|NP_459729.1| acyl-CoA thioester hydrolase YbgC [Salmonella ente	-7
212		gi|16764152|ref|NP_459767.1| formimidoylglutamase [Salmonella enterica subsp. e	-7
213		gi|16764199|ref|NP_459814.1| hypothetical protein STM0837 [Salmonella enterica	-7
214		gi|16764206|ref|NP_459821.1| pyruvate formate lyase activating enzyme [Salmonel	-7
215		gi|16764291|ref|NP_459906.1| inner membrane protein [Salmonella enterica subsp.	-7
216		gi|16764292|ref|NP_459907.1| hypothetical protein STM0930 [Salmonella enterica	-7
217		gi|16764391|ref|NP_460006.1| hypothetical protein STM1031 [Phage Gifsy-2]	-7
218		gi|16764460|ref|NP_460075.1| 4-hydroxyphenylacetate catabolism [Salmonella ente	-7
219		gi|16764486|ref|NP_460101.1| N-acetylmannosamine-6-phosphate 2-epimerase [Salmo	-7
220		gi|16764498|ref|NP_460113.1| DNA-binding transcriptional regulator CsgD [Salmon	-7
221		gi|16764516|ref|NP_460131.1| N-methyltryptophan oxidase [Salmonella enterica su	-7
222	extracellular flagellum component	gi|16764533|ref|NP_460148.1| flagellar hook protein FlgE [Salmonella enterica s	-7
223		gi|16764534|ref|NP_460149.1| flagellar basal body rod protein FlgF [Salmonella	-7
224		gi|16764548|ref|NP_460163.1| 3-oxoacyl-(acyl carrier protein) synthase III [Sal	-7
225		gi|16764600|ref|NP_460215.1| virulence membrane protein PAGC precursor [Salmone	-7
226		gi|16764657|ref|NP_460272.1| succinylarginine dihydrolase [Salmonella enterica	-7
227		gi|16764722|ref|NP_460337.1| cysteine desulfurase activator complex subunit Suf	-7
228		gi|16764726|ref|NP_460341.1| methyl-accepting chemotaxis protein [Salmonella en	-7
229	SseB	gi|16764748|ref|NP_460363.1| translocation machinery component [Salmonella ente	-7
230		gi|16764778|ref|NP_460393.1| DNA-binding transcriptional repressor PurR [Salmon	-7
231		gi|16764905|ref|NP_460520.1| lipoprotein [Salmonella enterica subsp. enterica s	-7
232		gi|16764921|ref|NP_460536.1| nitrate reductase 2 alpha subunit [Salmonella ente	-7
233		gi|16764931|ref|NP_460546.1| outer membrane receptor [Salmonella enterica subsp	-7
234		gi|16765021|ref|NP_460636.1| 2'-hydroxyisoflavone reductase [Salmonella enteric	-7
235		gi|16765027|ref|NP_460642.1| hypothetical protein STM1684 [Salmonella enterica	-7
236		gi|16765035|ref|NP_460650.1| peptide transport protein [Salmonella enterica sub	-7
237		gi|16765087|ref|NP_460702.1| oligopeptide transporter ATP-binding component [Sa	-7
238		gi|16765230|ref|NP_460845.1| pyruvate kinase [Salmonella enterica subsp. enteri	-7
239		gi|16765415|ref|NP_461030.1| rhamnosyl transferase [Salmonella enterica subsp.	-7
240		gi|16765422|ref|NP_461037.1| glucose-1-phosphate cytidylyltransferase [Salmonel	-7
241		gi|16765586|ref|NP_461201.1| quinol dehydrogenase periplasmic component [Salmon	-7
242		gi|16765604|ref|NP_461219.1| ribonucleotide-diphosphate reductase subunit alpha	-7
243		gi|16765652|ref|NP_461267.1| NADH dehydrogenase subunit E [Salmonella enterica	-7
244		gi|16765778|ref|NP_461393.1| ethanolamine ammonia-lyase heavy chain [Salmonella	-7
245		gi|16765811|ref|NP_461426.1| thioredoxin-dependent thiol peroxidase [Salmonella	-7
246		gi|16765832|ref|NP_461447.1| exodeoxyribonuclease VII large subunit [Salmonella	-7
247		gi|16765926|ref|NP_461541.1| head-tail preconnector-like protein [Salmonella en	-7
248		gi|16765958|ref|NP_461573.1| periplasmic negative regulator of sigmaE [Salmonel	-7
249		gi|16765991|ref|NP_461606.1| 30S ribosomal protein S16 [Salmonella enterica sub	-7
250		gi|16766010|ref|NP_461625.1| phage tail-like protein [Salmonella enterica subsp	-7
251		gi|16766018|ref|NP_461633.1| hypothetical protein STM2705 [Salmonella enterica	-7
252		gi|16766025|ref|NP_461640.1| phage tail-like protein [Salmonella enterica subsp	-7
253		gi|16766054|ref|NP_461669.1| cytoplasmic protein [Salmonella enterica subsp. en	-7
254		gi|16766152|ref|NP_461767.1| hydrogenase 3 large subunit processing protein [Sa	-7
255	SipB	gi|16766191|ref|NP_461806.1| translocation machinery component [Salmonella ente	-7
256		gi|16766223|ref|NP_461838.1| tRNA synthase [Salmonella enterica subsp. enterica	-7
257		gi|16766269|ref|NP_461884.1| flavodoxin [Salmonella enterica subsp. enterica se	-7
258		gi|16766276|ref|NP_461891.1| L-serine dehydratase/L-threonine deaminase 2 [Salm	-7
259		gi|16766313|ref|NP_461928.1| DNA-binding transcriptional regulator GalR [Salmon	-7
260		gi|16766435|ref|NP_462050.1| mannonate dehydratase [Salmonella enterica subsp.	-7
261		gi|16766450|ref|NP_462065.1| hydrogenase 2 small subunit [Salmonella enterica s	-7
262		gi|16766455|ref|NP_462070.1| cytoplasmic protein [Salmonella enterica subsp. en	-7
263		gi|16766539|ref|NP_462154.1| L-serine deaminase [Salmonella enterica subsp. ent	-7
264		gi|16766748|ref|NP_462363.1| ABC transporter ATP-binding protein [Salmonella en	-7
265		gi|16766760|ref|NP_462375.1| peptidyl-prolyl cis-trans isomerase A (rotamase A)	-7
266		gi|16766807|ref|NP_462422.1| cytoplasmic protein [Salmonella enterica subsp. en	-7
267		gi|16766838|ref|NP_462453.1| hypothetical protein STM3552 [Salmonella enterica	-7
268		gi|16766845|ref|NP_462460.1| cytoplasmic protein [Salmonella enterica subsp. en	-7
269		gi|16766863|ref|NP_462478.1| methyl-accepting transmembrane citrate/phenol chem	-7
270		gi|16766866|ref|NP_462481.1| hypothetical protein STM3580 [Salmonella enterica	-7
271		gi|16766930|ref|NP_462545.1| biotin sulfoxide reductase [Salmonella enterica su	-7
272		gi|16767041|ref|NP_462656.1| autotransporter [Salmonella enterica subsp. enteri	-7
273		gi|16767051|ref|NP_462666.1| cytoplasmic protein [Salmonella enterica subsp. en	-7
274		gi|16767128|ref|NP_462743.1| tRNA modification GTPase TrmE [Salmonella enterica	-7
275		gi|16767237|ref|NP_462852.1| dienelactone hydrolase [Salmonella enterica subsp.	-7
276		gi|16767264|ref|NP_462879.1| DNA polymerase I [Salmonella enterica subsp. enter	-7
277		gi|16767302|ref|NP_462917.1| formate dehydrogenase alpha subunit [Salmonella en	-7
278		gi|16767308|ref|NP_462923.1| hypothetical protein STM4042A [Salmonella enterica	-7
279		gi|16767412|ref|NP_463027.1| cytoplasmic protein [Salmonella enterica subsp. en	-7
280		gi|39546394|ref|NP_463143.2| cytochrome c nitrite reductase pentaheme subunit [	-7
281		gi|16767536|ref|NP_463151.1| dioxygenase [Salmonella enterica subsp. enterica s	-7
282		gi|16767547|ref|NP_463162.1| DNA-binding transcriptional regulator MelR [Salmon	-7
283		gi|16767569|ref|NP_463184.1| non-specific acid phosphatase [Salmonella enterica	-7
284		gi|16767613|ref|NP_463228.1| transcriptional repressor NsrR [Salmonella enteric	-7
285		gi|16767647|ref|NP_463262.1| reductase [Salmonella enterica subsp. enterica ser	-7
286		gi|16767718|ref|NP_463333.1| acetyltransferase [Salmonella enterica subsp. ente	-7
287		gi|16767720|ref|NP_463335.1| valyl-tRNA synthetase [Salmonella enterica subsp.	-7
288		gi|16767754|ref|NP_463369.1| aspartate racemase [Salmonella enterica subsp. ent	-7
289		gi|17233449|ref|NP_490569.1| conjugal transfer protein TrbD [Salmonella typhimu	-7
290		gi|16763409|ref|NP_459024.1| hydroxymethyltransferase [Salmonella enterica subs	-6
291		gi|16763573|ref|NP_459188.1| 2-amino-4-hydroxy-6-hydroxymethyldihyropteridine p	-6
292		gi|16763585|ref|NP_459200.1| fimbrial subunit [Salmonella enterica subsp. enter	-6
293		gi|16763624|ref|NP_459239.1| lysine decarboxylase 2 [Salmonella enterica subsp.	-6
294		gi|16763642|ref|NP_459257.1| methyltransferase [Salmonella enterica subsp. ente	-6
295		gi|16763656|ref|NP_459271.1| cytoplasmic protein [Salmonella enterica subsp. en	-6
296		gi|16763690|ref|NP_459305.1| VirG-like protein [Salmonella enterica subsp. ente	-6
297		gi|16763942|ref|NP_459557.1| periplasmic protein [Salmonella enterica subsp. en	-6
298		gi|16764193|ref|NP_459808.1| DNA starvation/stationary phase protection protein	-6
299	SopD2	gi|16764332|ref|NP_459947.1| SopD-like protein [Salmonella enterica subsp. ente	-6
300		gi|16764440|ref|NP_460055.1| outer membrane protein [Salmonella enterica subsp.	-6
301		gi|16764563|ref|NP_460178.1| thiamine kinase [Salmonella enterica subsp. enteri	-6
302		gi|39546318|ref|NP_460425.2| oxidoreductase [Salmonella enterica subsp. enteric	-6
303		gi|16764932|ref|NP_460547.1| DNA-binding transcriptional regulator [Salmonella	-6
304		gi|16764949|ref|NP_460564.1| repressor [Salmonella enterica subsp. enterica ser	-6
305		gi|16765022|ref|NP_460637.1| periplasmic murein tripeptide transport protein [S	-6
306		gi|16765132|ref|NP_460747.1| hydrogenase-1 protein [Salmonella enterica subsp.	-6
307		gi|16765327|ref|NP_460942.1| DNA mismatch endonuclease [Salmonella enterica sub	-6
308		gi|16765452|ref|NP_461067.1| uridine kinase [Salmonella enterica subsp. enteric	-6
309		gi|161353587|ref|NP_461715.2| hypothetical protein STM2789 [Salmonella enterica	-6
310		gi|39546350|ref|NP_461779.2| hydrogenase formation protein [Salmonella enterica	-6
311		gi|16766580|ref|NP_462195.1| polynucleotide phosphorylase/polyadenylase [Salmon	-6
312		gi|16766794|ref|NP_462409.1| ferrous iron transport protein B [Salmonella enter	-6
313		gi|16767626|ref|NP_463241.1| esterase [Salmonella enterica subsp. enterica sero	-6
314		gi|16767815|ref|NP_463430.1| outer membrane protein [Salmonella enterica subsp.	-6
315		gi|17233440|ref|NP_490560.1| conjugal transfer protein TraM [Salmonella typhimu	-6
316		gi|17233469|ref|NP_490589.1| conjugative transfer protein [Salmonella typhimuri	-6
317		gi|16763507|ref|NP_459122.1| acetolactate synthase 3 regulatory subunit [Salmon	-5
318		gi|16763549|ref|NP_459164.1| restriction endonuclease [Salmonella enterica subs	-5
319		gi|16763564|ref|NP_459179.1| fimbrial protein precurosr [Salmonella enterica su	-5
320		gi|16763574|ref|NP_459189.1| poly(A) polymerase I [Salmonella enterica subsp. e	-5
321		gi|16763579|ref|NP_459194.1| ATP-dependent RNA helicase HrpB [Salmonella enteri	-5
322		gi|16763599|ref|NP_459214.1| serine endoprotease [Salmonella enterica subsp. en	-5
323		gi|39546290|ref|NP_459273.2| cytoplasmic protein [Salmonella enterica subsp. en	-5
324		gi|16763665|ref|NP_459280.1| hypothetical protein STM0282 [Salmonella enterica	-5
325		gi|16763680|ref|NP_459295.1| transposase [Salmonella enterica subsp. enterica s	-5
326		gi|16763682|ref|NP_459297.1| outer membrane protein [Salmonella enterica subsp.	-5
327		gi|16763687|ref|NP_459302.1| transcriptional regulator [Salmonella enterica sub	-5
328		gi|16763831|ref|NP_459446.1| DNA-binding ATP-dependent protease La [Salmonella	-5
329		gi|16763834|ref|NP_459449.1| DNA uptake protein [Salmonella enterica subsp. ent	-5
330		gi|16763889|ref|NP_459504.1| outer membrane protein [Salmonella enterica subsp.	-5
331		gi|16763931|ref|NP_459546.1| hypothetical protein STM0551 [Salmonella enterica	-5
332		gi|16763938|ref|NP_459553.1| sensor kinase [Salmonella enterica subsp. enterica	-5
333		gi|16763955|ref|NP_459570.1| dihydropteridine reductase [Salmonella enterica su	-5
334		gi|16763958|ref|NP_459573.1| regulatory protein [Salmonella enterica subsp. ent	-5
335		gi|16763999|ref|NP_459614.1| citrate lyase beta chain [Salmonella enterica subs	-5
336		gi|16764006|ref|NP_459621.1| cold shock protein CspE [Salmonella enterica subsp	-5
337		gi|16764014|ref|NP_459629.1| D-alanyl-D-alanine carboxypeptidase fraction A [Sa	-5
338		gi|16764186|ref|NP_459801.1| hypothetical protein STM0823 [Salmonella enterica	-5
339		gi|16764188|ref|NP_459803.1| SAM-dependent methyltransferase [Salmonella enteri	-5
340		gi|16764247|ref|NP_459862.1| sulfatase [Salmonella enterica subsp. enterica ser	-5
341		gi|16764251|ref|NP_459866.1| arginine transport system [Salmonella enterica sub	-5
342		gi|16764325|ref|NP_459940.1| anaerobic dimethyl sulfoxide reductase subunit A [	-5
343		gi|161353606|ref|NP_459945.2| pyruvate formate lyase-activating enzyme 1 [Salmo	-5
344		gi|16764427|ref|NP_460042.1| protease [Salmonella enterica subsp. enterica sero	-5
345		gi|16764444|ref|NP_460059.1| hypothetical protein STM1085 [Salmonella enterica	-5
346		gi|16764500|ref|NP_460115.1| cryptic curlin major subunit [Salmonella enterica	-5
347		gi|16764527|ref|NP_460142.1| FlgK/FlgL export chaperone [Salmonella enterica su	-5
348		gi|16764531|ref|NP_460146.1| flagellar basal body rod protein FlgC [Salmonella	-5
349	extracellular flagellum component	gi|16764539|ref|NP_460154.1| flagellar hook-associated protein FlgK [Salmonella	-5
350		gi|16764546|ref|NP_460161.1| 50S ribosomal protein L32 [Salmonella enterica sub	-5
351		gi|16764553|ref|NP_460168.1| 4-amino-4-deoxychorismate lyase [Salmonella enteri	-5
352		gi|16764567|ref|NP_460182.1| hypothetical protein STM1212 [Salmonella enterica	-5
353	SifA	gi|16764579|ref|NP_460194.1| secreted effector protein [Salmonella enterica sub	-5
354		gi|16764712|ref|NP_460327.1| transport protein [Salmonella enterica subsp. ente	-5
355		gi|16764725|ref|NP_460340.1| hypothetical protein STM1375 [Salmonella enterica	-5
356		gi|16764818|ref|NP_460433.1| periplasmic protein [Salmonella enterica subsp. en	-5
357		gi|16764834|ref|NP_460449.1| dithiobiotin synthetase [Salmonella enterica subsp	-5
358		gi|16764844|ref|NP_460459.1| dimethyl sulphoxide reductase chain A1 [Salmonella	-5
359		gi|161353565|ref|NP_460479.3| DNA-binding transcriptional activator MarA [Salmo	-5
360		gi|16764935|ref|NP_460550.1| inner membrane protein [Salmonella enterica subsp.	-5
361		gi|16764939|ref|NP_460554.1| virulence protein [Salmonella enterica subsp. ente	-5
362	SifB	gi|16764946|ref|NP_460561.1| secreted effector protein [Salmonella enterica sub	-5
363		gi|16764971|ref|NP_460586.1| alcohol dehydrogenase class III [Salmonella enteri	-5
364		gi|16765019|ref|NP_460634.1| aldo/keto reductase [Salmonella enterica subsp. en	-5
365		gi|16765065|ref|NP_460680.1| hypothetical protein STM1721 [Salmonella enterica	-5
366		gi|16765123|ref|NP_460738.1| hypothetical protein STM1782 [Salmonella enterica	-5
367		gi|16765167|ref|NP_460782.1| L-serine deaminase I/L-threonine deaminase I [Salm	-5
368		gi|16765209|ref|NP_460824.1| lytic enzyme [Salmonella enterica subsp. enterica	-5
369		gi|16765248|ref|NP_460863.1| enzyme [Salmonella enterica subsp. enterica serova	-5
370		gi|16765274|ref|NP_460889.1| hypothetical protein STM1933 [Salmonella enterica	-5
371		gi|16765314|ref|NP_460929.1| flagellar motor switch protein FliM [Salmonella en	-5
372		gi|16765340|ref|NP_460955.1| periplasmic protein [Salmonella enterica subsp. en	-5
373		gi|16765354|ref|NP_460969.1| cobalt-precorrin-2 C(20)-methyltransferase [Salmon	-5
374		gi|16765357|ref|NP_460972.1| precorrin-3B C17-methyltransferase [Salmonella ent	-5
375		gi|16765423|ref|NP_461038.1| CDP-6-deoxy-delta-3,4-glucoseen reductase [Salmone	-5
376		gi|16765445|ref|NP_461060.1| glycosyl transferase [Salmonella enterica subsp. e	-5
377		gi|16765486|ref|NP_461101.1| hypothetical protein STM2156A [Salmonella enterica	-5
378		gi|16765548|ref|NP_461163.1| ABC-type transport system ATPase component [Salmon	-5
379		gi|16765651|ref|NP_461266.1| NADH dehydrogenase I subunit F [Salmonella enteric	-5
380		gi|16765718|ref|NP_461333.1| long-chain fatty acid outer membrane transporter [	-5
381		gi|16765798|ref|NP_461413.1| hypothetical protein STM2478 [Salmonella enterica	-5
382		gi|16765799|ref|NP_461414.1| oxidoreductase Fe-S binding subunit [Salmonella en	-5
383		gi|16765886|ref|NP_461501.1| periplasmic protein [Salmonella enterica subsp. en	-5
384		gi|16765899|ref|NP_461514.1| DNA repair protein RecO [Salmonella enterica subsp	-5
385		gi|16765901|ref|NP_461516.1| ribonuclease III [Salmonella enterica subsp. enter	-5
386		gi|16765965|ref|NP_461580.1| neutral amino-acid efflux protein [Salmonella ente	-5
387		gi|16766043|ref|NP_461658.1| hypothetical protein STM2731 [Salmonella enterica	-5
388		gi|16766049|ref|NP_461664.1| hypothetical protein STM2737 [Salmonella enterica	-5
389		gi|39546348|ref|NP_945167.1| hypothetical protein STM2740.1N [Salmonella enteri	-5
390		gi|16766084|ref|NP_461699.1| DNA-invertase Hin [Salmonella enterica subsp. ente	-5
391		gi|16766085|ref|NP_461700.1| glycosyl transferase [Salmonella enterica subsp. e	-5
392		gi|16766109|ref|NP_461724.1| rhodanese-like sulfurtransferase [Salmonella enter	-5
393		gi|16766288|ref|NP_461903.1| cysteine sulfinate desulfinase [Salmonella enteric	-5
394		gi|16766406|ref|NP_462021.1| periplasmic protein [Salmonella enterica subsp. en	-5
395		gi|16766420|ref|NP_462035.1| transcriptional regulator [Salmonella enterica sub	-5
396		gi|16766501|ref|NP_462116.1| bifunctional glutamine-synthetase adenylyltransfer	-5
397		gi|16766512|ref|NP_462127.1| G/U mismatch-specific DNA glycosylase [Salmonella	-5
398		gi|16766528|ref|NP_462143.1| inner membrane protein [Salmonella enterica subsp.	-5
399		gi|16766532|ref|NP_462147.1| glutathione S-transferase [Salmonella enterica sub	-5
400		gi|16766706|ref|NP_462321.1| 30S ribosomal protein S11 [Salmonella enterica sub	-5
401		gi|16766737|ref|NP_462352.1| 30S ribosomal protein S12 [Salmonella enterica sub	-5
402		gi|16766739|ref|NP_462354.1| sulfur relay protein TusC [Salmonella enterica sub	-5
403		gi|16766811|ref|NP_462426.1| intramembrane serine protease GlpG [Salmonella ent	-5
404		gi|16766869|ref|NP_462484.1| holo-(acyl carrier protein) synthase 2 [Salmonella	-5
405		gi|16766907|ref|NP_462522.1| cytoplasmic protein [Salmonella enterica subsp. en	-5
406		gi|16766924|ref|NP_462539.1| long polar fimbrial outer membrane usher protein [	-5
407		gi|16766939|ref|NP_462554.1| acetyltransferase [Salmonella enterica subsp. ente	-5
408		gi|16766945|ref|NP_462560.1| xylulokinase [Salmonella enterica subsp. enterica	-5
409		gi|16766992|ref|NP_462607.1| glycosyl transferase [Salmonella enterica subsp. e	-5
410		gi|16767010|ref|NP_462625.1| phosphopantetheine adenylyltransferase [Salmonella	-5
411		gi|16767027|ref|NP_462642.1| bifunctional (p)ppGpp synthetase II/ guanosine-3',	-5
412		gi|16767062|ref|NP_462677.1| DNA-binding protein [Salmonella enterica subsp. en	-5
413		gi|16767096|ref|NP_462711.1| cytoplasmic protein [Salmonella enterica subsp. en	-5
414		gi|16767151|ref|NP_462766.1| F0F1 ATP synthase subunit alpha [Salmonella enteri	-5
415		gi|16767262|ref|NP_462877.1| periplasmic protein disulfide isomerase I [Salmone	-5
416		gi|16767326|ref|NP_462941.1| periplasmic repressor CpxP [Salmonella enterica su	-5
417		gi|16767350|ref|NP_462965.1| ferredoxin-NADP reductase [Salmonella enterica sub	-5
418		gi|16767362|ref|NP_462977.1| 50S ribosomal protein L31 [Salmonella enterica sub	-5
419		gi|16767366|ref|NP_462981.1| cystathionine gamma-synthase [Salmonella enterica	-5
420		gi|16767372|ref|NP_462987.1| hydroperoxidase [Salmonella enterica subsp. enteri	-5
421		gi|16767474|ref|NP_463089.1| periplasmic protein [Salmonella enterica subsp. en	-5
422		gi|16767492|ref|NP_463107.1| conjugative transfer protein [Salmonella enterica	-5
423		gi|16767502|ref|NP_463117.1| inner membrane protein [Salmonella enterica subsp.	-5
424		gi|16767517|ref|NP_463132.1| glutathione S-transferase [Salmonella enterica sub	-5
425		gi|16767702|ref|NP_463317.1| transposase [Salmonella enterica subsp. enterica s	-5
426		gi|16767717|ref|NP_463332.1| inner membrane protein [Salmonella enterica subsp.	-5
427		gi|16767738|ref|NP_463353.1| ABC-type sugar/spermidine/putrescine transport sys	-5
428		gi|16767826|ref|NP_463441.1| phosphoglycerate mutase [Salmonella enterica subsp	-5
429		gi|17233447|ref|NP_490567.1| conjugal transfer pilus assembly protein TraB [Sal	-5
430		gi|16763398|ref|NP_459013.1| molybdenum cofactor biosynthesis protein MogA [Sal	-4
431		gi|16763552|ref|NP_459167.1| inner membrane protein [Salmonella enterica subsp.	-4
432		gi|16763951|ref|NP_459566.1| PTS system mannose-specific enzyme IID [Salmonella	-4
433		gi|39546301|ref|NP_459641.2| hydrolase [Salmonella enterica subsp. enterica ser	-4
434		gi|16764124|ref|NP_459739.1| hypothetical protein STM0759 [Salmonella enterica	-4
435		gi|16764815|ref|NP_460430.1| fumarate hydratase [Salmonella enterica subsp. ent	-4
436		gi|39546324|ref|NP_460705.2| oligopeptide transport protein [Salmonella enteric	-4
437		gi|16765313|ref|NP_460928.1| flagellar basal body-associated protein FliL [Salm	-4
438		gi|16765344|ref|NP_460959.1| hypothetical protein STM2013 [Salmonella enterica	-4
439		gi|16765537|ref|NP_461152.1| proton efflux pump [Salmonella enterica subsp. ent	-4
440		gi|16765640|ref|NP_461255.1| ribonuclease Z [Salmonella enterica subsp. enteric	-4
441		gi|16765833|ref|NP_461448.1| AIDA autotransporter-like protein [Salmonella ente	-4
442		gi|16765845|ref|NP_461460.1| ribosomal RNA large subunit methyltransferase N [S	-4
443		gi|16765852|ref|NP_461467.1| inner membrane lipoprotein [Salmonella enterica su	-4
444		gi|16765854|ref|NP_461469.1| cytoplasmic protein [Salmonella enterica subsp. en	-4
445		gi|16766123|ref|NP_461738.1| inner membrane protein [Salmonella enterica subsp.	-4
446	AvrA	gi|16766171|ref|NP_461786.1| secreted effector protein [Salmonella enterica sub	-4
447		gi|16766233|ref|NP_461848.1| stationary phase survival protein SurE [Salmonella	-4
448		gi|39546357|ref|NP_461975.2| hypothetical protein STM3059.S [Salmonella enteric	-4
449		gi|16766584|ref|NP_462199.1| translation initiation factor IF-2 [Salmonella ent	-4
450		gi|16766678|ref|NP_462293.1| ribosomal protein L11 methyltransferase [Salmonell	-4
451		gi|16766958|ref|NP_462573.1| periplasmic dicarboxylate-binding protein [Salmone	-4
452		gi|16767046|ref|NP_462661.1| inner membrane protein [Salmonella enterica subsp.	-4
453		gi|16767321|ref|NP_462936.1| superoxide dismutase [Salmonella enterica subsp. e	-4
454		gi|16767471|ref|NP_463086.1| glucose-6-phosphate isomerase [Salmonella enterica	-4
455		gi|16767527|ref|NP_463142.1| cytochrome c552 [Salmonella enterica subsp. enteri	-4
456		gi|16767603|ref|NP_463218.1| ATPase [Salmonella enterica subsp. enterica serova	-4
457		gi|16767617|ref|NP_463232.1| phage shock protein A [Salmonella enterica subsp.	-4
458		gi|16767703|ref|NP_463318.1| translation initiation inhibitor [Salmonella enter	-4
459		gi|16763408|ref|NP_459023.1| exochitinase [Salmonella enterica subsp. enterica	-3
460		gi|16763416|ref|NP_459031.1| fimbrial subunit [Salmonella enterica subsp. enter	-3
461		gi|16763451|ref|NP_459066.1| citrate lyase alpha chain/citrate-ACP transferase	-3
462		gi|16763459|ref|NP_459074.1| carnitine operon protein CaiE [Salmonella enterica	-3
463		gi|16763485|ref|NP_459100.1| 23S rRNA/tRNA pseudouridine synthase A [Salmonella	-3
464		gi|16763486|ref|NP_459101.1| ATP-dependent helicase HepA [Salmonella enterica s	-3
465		gi|16763500|ref|NP_459115.1| isopropylmalate isomerase small subunit [Salmonell	-3
466		gi|16763589|ref|NP_459204.1| minor fimbrial subunit [Salmonella enterica subsp.	-3
467		gi|16763639|ref|NP_459254.1| transcriptional regulator [Salmonella enterica sub	-3
468		gi|16763652|ref|NP_459267.1| cytoplasmic protein [Salmonella enterica subsp. en	-3
469		gi|16763683|ref|NP_459298.1| fimbrial assembly chaperone [Salmonella enterica s	-3
470		gi|16763685|ref|NP_459300.1| fimbrial subunit [Salmonella enterica subsp. enter	-3
471		gi|16763686|ref|NP_459301.1| xylanase/chitin deacetylase [Salmonella enterica s	-3
472		gi|16763711|ref|NP_459326.1| fumarylacetoacetate hydrolase [Salmonella enterica	-3
473		gi|16763713|ref|NP_459328.1| transcriptional regulator [Salmonella enterica sub	-3
474		gi|16763719|ref|NP_459334.1| fimbrial chaperone [Salmonella enterica subsp. ent	-3
475		gi|16763720|ref|NP_459335.1| fimbrial major subunit [Salmonella enterica subsp.	-3
476		gi|16763771|ref|NP_459386.1| hypothetical protein STM0391 [Salmonella enterica	-3
477		gi|16763791|ref|NP_459406.1| hypothetical protein STM0411 [Salmonella enterica	-3
478		gi|16763793|ref|NP_459408.1| nucleoside channel [Salmonella enterica subsp. ent	-3
479		gi|16763811|ref|NP_459426.1| 2-aminoethylphosphonate--pyruvate transaminase [Sa	-3
480		gi|16763839|ref|NP_459454.1| cysteine synthase/cystathionine beta-synthase [Sal	-3
481		gi|16763865|ref|NP_459480.1| hypothetical protein STM0485 [Salmonella enterica	-3
482		gi|16763909|ref|NP_459524.1| membrane protein FdrA [Salmonella enterica subsp.	-3
483		gi|16763918|ref|NP_459533.1| outer membrane protein [Salmonella enterica subsp.	-3
484		gi|16763919|ref|NP_459534.1| inner membrane protein [Salmonella enterica subsp.	-3
485		gi|16763922|ref|NP_459537.1| bifunctional 5,10-methylene-tetrahydrofolate dehyd	-3
486		gi|16763962|ref|NP_459577.1| outer membrane receptor FepA [Salmonella enterica	-3
487		gi|16763992|ref|NP_459607.1| dehydrogenase [Salmonella enterica subsp. enterica	-3
488		gi|16764022|ref|NP_459637.1| nicotinic acid mononucleotide adenylyltransferase	-3
489		gi|16764024|ref|NP_459639.1| LPS-assembly lipoprotein RlpB [Salmonella enterica	-3
490		gi|16764051|ref|NP_459666.1| UMP phosphatase [Salmonella enterica subsp. enteri	-3
491		gi|16764083|ref|NP_459698.1| carboxylase [Salmonella enterica subsp. enterica s	-3
492		gi|16764086|ref|NP_459701.1| phage integrase [Salmonella enterica subsp. enteri	-3
493		gi|16764087|ref|NP_459702.1| inner membrane protein [Salmonella enterica subsp.	-3
494		gi|16764133|ref|NP_459748.1| cytoplasmic protein [Salmonella enterica subsp. en	-3
495		gi|16764221|ref|NP_459836.1| transcriptional regulator [Salmonella enterica sub	-3
496		gi|16764255|ref|NP_459870.1| excisionase [Salmonella enterica subsp. enterica s	-3
497		gi|16764265|ref|NP_459880.1| chaperone [Salmonella phage Fels-1]	-3
498		gi|16764322|ref|NP_459937.1| outer-membrane lipoprotein carrier protein [Salmon	-3
499		gi|16764370|ref|NP_459985.1| hypothetical protein STM1010 [Salmonella enterica	-3
500		gi|16764465|ref|NP_460080.1| 4-hydroxyphenylacetate catabolism [Salmonella ente	-3
501		gi|16764496|ref|NP_460111.1| curli assembly protein CsgF [Salmonella enterica s	-3
502		gi|16764508|ref|NP_460123.1| hypothetical protein STM1152 [Salmonella enterica	-3
503		gi|16764535|ref|NP_460150.1| flagellar basal body rod protein FlgG [Salmonella	-3
504		gi|16764569|ref|NP_460184.1| outer membrane protein [Salmonella enterica subsp.	-3
505		gi|16764606|ref|NP_460221.1| outer membrane lipoprotein [Salmonella enterica su	-3
506		gi|16764635|ref|NP_460250.1| hypothetical protein STM1284 [Salmonella enterica	-3
507		gi|16764649|ref|NP_460264.1| DNA topoisomerase III [Salmonella enterica subsp.	-3
508		gi|16764654|ref|NP_460269.1| bifunctional succinylornithine transaminase/acetyl	-3
509		gi|39546314|ref|NP_460300.2| translation initiation factor IF-3 [Salmonella ent	-3
510		gi|16764803|ref|NP_460418.1| electron transport complex protein RnfG [Salmonell	-3
511		gi|16764824|ref|NP_460439.1| NAD(P) transhydrogenase subunit alpha [Salmonella	-3
512		gi|16764829|ref|NP_460444.1| protease [Salmonella enterica subsp. enterica sero	-3
513		gi|16764884|ref|NP_460499.1| hydrogenase-1 small subunit [Salmonella enterica s	-3
514		gi|16764907|ref|NP_460522.1| envelope protein [Salmonella enterica subsp. enter	-3
515		gi|16764938|ref|NP_460553.1| virulence protein [Salmonella enterica subsp. ente	-3
516		gi|16764977|ref|NP_460592.1| periplasmic binding protein [Salmonella enterica s	-3
517		gi|16764983|ref|NP_460598.1| cytochrome b561 [Salmonella enterica subsp. enteri	-3
518		gi|16764987|ref|NP_460602.1| inner membrane protein [Salmonella enterica subsp.	-3
519		gi|16764989|ref|NP_460604.1| outer membrane lipoprotein [Salmonella enterica su	-3
520		gi|16764995|ref|NP_460610.1| pyruvate-flavodoxin oxidoreductase [Salmonella ent	-3
521		gi|16765000|ref|NP_460615.1| zinc transporter [Salmonella enterica subsp. enter	-3
522		gi|16765010|ref|NP_460625.1| thiol peroxidase [Salmonella enterica subsp. enter	-3
523		gi|16765018|ref|NP_460633.1| oxidoreductase [Salmonella enterica subsp. enteric	-3
524		gi|16765117|ref|NP_460732.1| peptide chain release factor 1 [Salmonella enteric	-3
525		gi|16765203|ref|NP_460818.1| integral membrane protein [Salmonella enterica sub	-3
526		gi|16765227|ref|NP_460842.1| phosphogluconate dehydratase [Salmonella enterica	-3
527		gi|161353595|ref|NP_460848.2| high-affinity zinc transporter periplasmic compon	-3
528		gi|16765279|ref|NP_460894.1| hypothetical protein STM1938 [Salmonella enterica	-3
529		gi|16765301|ref|NP_460916.1| cytoplasmic alpha-amylase [Salmonella enterica sub	-3
530		gi|16765302|ref|NP_460917.1| hypothetical protein STM1964 [Salmonella enterica	-3
531		gi|16765355|ref|NP_460970.1| vitamin B12 biosynthetic protein [Salmonella enter	-3
532		gi|16765380|ref|NP_460995.1| propanediol utilization protein [Salmonella enteri	-3
533		gi|16765381|ref|NP_460996.1| CoA-dependent propionaldehyde dehydrogenase [Salmo	-3
534		gi|16765389|ref|NP_461004.1| hypothetical protein STM2059 [Salmonella enterica	-3
535		gi|16765413|ref|NP_461028.1| phosphomannomutase [Salmonella enterica subsp. ent	-3
536		gi|16765414|ref|NP_461029.1| mannose-1-phosphate guanylyltransferase [Salmonell	-3
537		gi|16765420|ref|NP_461035.1| CDP-6-deoxy-D-xylo-4-hexulose-3-dehydrase [Salmone	-3
538		gi|16765425|ref|NP_461040.1| dTDP-glucose pyrophosphorylase [Salmonella enteric	-3
539		gi|16765427|ref|NP_461042.1| dTDP-glucose 4,6 dehydratase [Salmonella enterica	-3
540		gi|16765499|ref|NP_461114.1| transport protein [Salmonella enterica subsp. ente	-3
541		gi|16765507|ref|NP_461122.1| flutathione S-transferase [Salmonella enterica sub	-3
542		gi|16765529|ref|NP_461144.1| colicin I receptor [Salmonella enterica subsp. ent	-3
543		gi|16765531|ref|NP_461146.1| DNA-binding transcriptional regulator [Salmonella	-3
544		gi|16765568|ref|NP_461183.1| cytoplasmic protein [Salmonella enterica subsp. en	-3
545		gi|16765571|ref|NP_461186.1| tail fiber protein of phage [Salmonella enterica s	-3
546		gi|16765589|ref|NP_461204.1| ferredoxin-type protein [Salmonella enterica subsp	-3
547		gi|16765636|ref|NP_461251.1| 2-succinyl-5-enolpyruvyl-6-hydroxy-3-cyclohexene-1	-3
548		gi|16765670|ref|NP_461285.1| cytoplasmic protein [Salmonella enterica subsp. en	-3
549		gi|16765678|ref|NP_461293.1| histidine/lysine/arginine/ornithine transporter su	-3
550		gi|16765688|ref|NP_461303.1| regulatory protein [Salmonella enterica subsp. ent	-3
551		gi|16765709|ref|NP_461324.1| hypothetical protein STM2382 [Salmonella enterica	-3
552		gi|16765755|ref|NP_461370.1| pyridoxal kinase [Salmonella enterica subsp. enter	-3
553		gi|16765781|ref|NP_461396.1| transport protein [Salmonella enterica subsp. ente	-3
554		gi|16765793|ref|NP_461408.1| transaldolase A [Salmonella enterica subsp. enteri	-3
555		gi|16765806|ref|NP_461421.1| inner membrane protein [Salmonella enterica subsp.	-3
556		gi|16765865|ref|NP_461480.1| rRNA methylase [Salmonella enterica subsp. enteric	-3
557		gi|16765910|ref|NP_461525.1| host specificity protein-J-like [Salmonella enteri	-3
558		gi|16766015|ref|NP_461630.1| DNA invertase-like protein [Salmonella enterica su	-3
559		gi|16766039|ref|NP_461654.1| hypothetical protein STM2727 [Salmonella enterica	-3
560		gi|16766041|ref|NP_461656.1| hypothetical protein STM2729 [Salmonella enterica	-3
561		gi|16766071|ref|NP_461686.1| dipeptide/oligopeptide/nickel ABC-type transport s	-3
562		gi|16766099|ref|NP_461714.1| tricarboxylic transport [Salmonella enterica subsp	-3
563		gi|16766130|ref|NP_461745.1| inner membrane protein [Salmonella enterica subsp.	-3
564		gi|16766132|ref|NP_461747.1| carbon storage regulator [Salmonella enterica subs	-3
565		gi|16766172|ref|NP_461787.1| transcriptional regulator [Salmonella enterica sub	-3
566		gi|16766197|ref|NP_461812.1| surface presentation of antigens protein SpaO [Sal	-3
567		gi|16766263|ref|NP_461878.1| 23S rRNA 5-methyluridine methyltransferase [Salmon	-3
568		gi|16766310|ref|NP_461925.1| aldo-keto reductase [Salmonella enterica subsp. en	-3
569		gi|16766317|ref|NP_461932.1| racemase [Salmonella enterica subsp. enterica sero	-3
570		gi|16766329|ref|NP_461944.1| fimbrial chaperone [Salmonella enterica subsp. ent	-3
571		gi|16766339|ref|NP_461954.1| metalloendopeptidase [Salmonella enterica subsp. e	-3
572		gi|16766383|ref|NP_461998.1| zinc-binding dehydrogenase [Salmonella enterica su	-3
573		gi|16766401|ref|NP_462016.1| hypothetical protein STM3100 [Salmonella enterica	-3
574		gi|16766415|ref|NP_462030.1| ornithine decarboxylase [Salmonella enterica subsp	-3
575		gi|16766417|ref|NP_462032.1| lactoylglutathione lyase [Salmonella enterica subs	-3
576		gi|16766436|ref|NP_462051.1| D-mannonate oxidoreductase [Salmonella enterica su	-3
577		gi|39546360|ref|NP_462081.2| cation transporter [Salmonella enterica subsp. ent	-3
578		gi|16766565|ref|NP_462180.1| hypothetical protein STM3267 [Salmonella enterica	-3
579		gi|16766571|ref|NP_462186.1| lipid carrier protein [Salmonella enterica subsp.	-3
580		gi|16766617|ref|NP_462232.1| PTS system transporter subunit IIA-like nitrogen-r	-3
581		gi|16766645|ref|NP_462260.1| inner membrane protein [Salmonella enterica subsp.	-3
582		gi|16766662|ref|NP_462277.1| DNA-binding transcriptional regulator [Salmonella	-3
583		gi|16766715|ref|NP_462330.1| 30S ribosomal protein S8 [Salmonella enterica subs	-3
584		gi|16766733|ref|NP_462348.1| bacterioferritin-associated ferredoxin [Salmonella	-3
585		gi|16766750|ref|NP_462365.1| hydrolase [Salmonella enterica subsp. enterica ser	-3
586		gi|16766761|ref|NP_462376.1| hypothetical protein STM3473 [Salmonella enterica	-3
587		gi|16766881|ref|NP_462496.1| phosphatase [Salmonella enterica subsp. enterica s	-3
588		gi|16766895|ref|NP_462510.1| transport protein [Salmonella enterica subsp. ente	-3
589		gi|16766942|ref|NP_462557.1| outer membrane lipoprotein [Salmonella enterica su	-3
590		gi|16766976|ref|NP_462591.1| inner membrane protein [Salmonella enterica subsp.	-3
591		gi|16767019|ref|NP_462634.1| ribonuclease PH [Salmonella enterica subsp. enteri	-3
592		gi|16767047|ref|NP_462662.1| Mg2+ transporter [Salmonella enterica subsp. enter	-3
593		gi|16767052|ref|NP_462667.1| selenocysteine synthase [Salmonella enterica subsp	-3
594		gi|16767068|ref|NP_462683.1| phosphotransferase system mannitol/fructose-specif	-3
595		gi|16767079|ref|NP_462694.1| acetolactate synthase 1 regulatory subunit [Salmon	-3
596		gi|16767089|ref|NP_462704.1| cytoplasmic protein [Salmonella enterica subsp. en	-3
597		gi|16767137|ref|NP_462752.1| transcriptional regulator PhoU [Salmonella enteric	-3
598		gi|16767159|ref|NP_462774.1| flavodoxin [Salmonella enterica subsp. enterica se	-3
599		gi|16767198|ref|NP_462813.1| glucose-1-phosphate thymidyl transferase [Salmonel	-3
600		gi|16767207|ref|NP_462822.1| uroporphyrinogen III C-methyltransferase [Salmonel	-3
601		gi|16767213|ref|NP_462828.1| cytoplasmic protein [Salmonella enterica subsp. en	-3
602		gi|161353579|ref|NP_462832.2| diaminopimelate epimerase [Salmonella enterica su	-3
603		gi|16767274|ref|NP_462889.1| GTP-binding protein [Salmonella enterica subsp. en	-3
604		gi|16767338|ref|NP_462953.1| autoinducer-2 (AI-2) kinase [Salmonella enterica s	-3
605		gi|16767359|ref|NP_462974.1| essential cell division protein FtsN [Salmonella e	-3
606		gi|16767394|ref|NP_463009.1| vitamin B12/cobalamin outer membrane transporter [	-3
607		gi|16767414|ref|NP_463029.1| thiazole synthase [Salmonella enterica subsp. ente	-3
608		gi|16767458|ref|NP_463073.1| cytoplasmic protein [Salmonella enterica subsp. en	-3
609		gi|16767460|ref|NP_463075.1| methyl-accepting chemotaxis protein [Salmonella en	-3
610		gi|16767499|ref|NP_463114.1| acid phosphatase/phosphotransferase [Salmonella en	-3
611		gi|16767506|ref|NP_463121.1| single-stranded DNA-binding protein [Salmonella en	-3
612		gi|16767511|ref|NP_463126.1| inner membrane protein [Salmonella enterica subsp.	-3
613		gi|16767516|ref|NP_463131.1| redox-sensing transcriptional activator [Salmonell	-3
614		gi|16767627|ref|NP_463242.1| transcriptional repressor UlaR [Salmonella enteric	-3
615		gi|16767655|ref|NP_463270.1| outer membrane protein [Salmonella enterica subsp.	-3
616		gi|16767661|ref|NP_463276.1| fructose-1,6-bisphosphatase [Salmonella enterica s	-3
617		gi|16767699|ref|NP_463314.1| trehalose-6-phosphate hydrolase [Salmonella enteri	-3
618		gi|16767733|ref|NP_463348.1| DNA helicases [Salmonella enterica subsp. enterica	-3
619		gi|16767783|ref|NP_463398.1| glucosamine-fructose-6-phosphate aminotransferase	-3
620		gi|16767802|ref|NP_463417.1| periplasmic protein [Salmonella enterica subsp. en	-3
621		gi|16767814|ref|NP_463429.1| periplasmic chaperone protein [Salmonella enterica	-3
622		gi|16767835|ref|NP_463450.1| fimbrial chaperone [Salmonella enterica subsp. ent	-3
623		gi|16767838|ref|NP_463453.1| periplasmic protein [Salmonella enterica subsp. en	-3
624		gi|17233482|ref|NP_490509.1| usher protein [Salmonella typhimurium LT2]	-3
625		gi|17233483|ref|NP_490510.1| major fimbrial subunit [Salmonella typhimurium LT2	-3
626		gi|17233485|ref|NP_490513.1| DNA replication protein [Salmonella typhimurium LT	-3
627	SpvC	gi|17233490|ref|NP_490528.1| hydrophilic protein [Salmonella typhimurium LT2]	-3
628		gi|17233500|ref|NP_490541.1| putative cytoplasmic protein [Salmonella typhimuri	-3
629		gi|17233445|ref|NP_490565.1| conjugal transfer pilus assembly protein TraE [Sal	-3
630		gi|16763413|ref|NP_459028.1| fimbrial usher [Salmonella enterica subsp. enteric	-2
631		gi|16763468|ref|NP_459083.1| ferredoxin [Salmonella enterica subsp. enterica se	-2
632		gi|16763661|ref|NP_459276.1| periplasmic protein [Salmonella enterica subsp. en	-2
633		gi|16763706|ref|NP_459321.1| IS3 transposase [Salmonella enterica subsp. enteri	-2
634		gi|16763988|ref|NP_459603.1| oxidoreductase protein [Salmonella enterica subsp.	-2
635		gi|16764008|ref|NP_459623.1| hydrolase [Salmonella enterica subsp. enterica ser	-2
636		gi|16764401|ref|NP_460016.1| minor tail protein [Phage Gifsy-2]	-2
637		gi|16764472|ref|NP_460087.1| suppression of copper sensitivity protein [Salmone	-2
638		gi|16764570|ref|NP_460185.1| periplasmic protein [Salmonella enterica subsp. en	-2
639		gi|16764595|ref|NP_460210.1| envelope lipoprotein [Salmonella enterica subsp. e	-2
640		gi|16764658|ref|NP_460273.1| succinylglutamate desuccinylase [Salmonella enteri	-2
641		gi|16764698|ref|NP_460313.1| phospho-2-dehydro-3-deoxyheptonate aldolase [Salmo	-2
642		gi|16764735|ref|NP_460350.1| tetrathionate reductase complex subunit B [Salmone	-2
643		gi|16764814|ref|NP_460429.1| fumarase A [Salmonella enterica subsp. enterica se	-2
644		gi|16764868|ref|NP_460483.1| transcriptional regulator [Salmonella enterica sub	-2
645		gi|16764869|ref|NP_460484.1| succinate semialdehyde dehydrogenase [Salmonella e	-2
646		gi|16764899|ref|NP_460514.1| transcriptional regulator [Salmonella enterica sub	-2
647		gi|16764966|ref|NP_460581.1| glucan biosynthesis protein D [Salmonella enterica	-2
648		gi|16765017|ref|NP_460632.1| regulatory protein [Salmonella enterica subsp. ent	-2
649		gi|16765149|ref|NP_460764.1| cytoplasmic protein [Salmonella enterica subsp. en	-2
650		gi|16765212|ref|NP_460827.1| RecE-like protein [Salmonella enterica subsp. ente	-2
651		gi|16765236|ref|NP_460851.1| Holliday junction DNA helicase RuvB [Salmonella en	-2
652		gi|39980854|ref|NP_460910.2| transposase for IS200 [Salmonella enterica subsp.	-2
653		gi|16765479|ref|NP_461094.1| outer membrane protein [Salmonella enterica subsp.	-2
654	SspH2	gi|16765569|ref|NP_461184.1| leucine-rich repeat-containing protein [Salmonella	-2
655		gi|16765705|ref|NP_461320.1| 3-oxoacyl-(acyl carrier protein) synthase I [Salmo	-2
656		gi|16765739|ref|NP_461354.1| glutamyl-tRNA synthetase [Salmonella enterica subs	-2
657		gi|16765814|ref|NP_461429.1| hypothetical protein STM2494 [Salmonella enterica	-2
658		gi|16766014|ref|NP_461629.1| phage tail sheath-like protein [Salmonella enteric	-2
659		gi|16766153|ref|NP_461768.1| hydrogenase [Salmonella enterica subsp. enterica s	-2
660	SopD1	gi|16766251|ref|NP_461866.1| secreted effector protein [Salmonella enterica sub	-2
661		gi|16766362|ref|NP_461977.1| ligase [Salmonella enterica subsp. enterica serova	-2
662		gi|161353586|ref|NP_462010.2| 16S ribosomal RNA methyltransferase RsmE [Salmone	-2
663		gi|16766545|ref|NP_462160.1| glycerate kinase I [Salmonella enterica subsp. ent	-2
664		gi|16766548|ref|NP_462163.1| galactarate dehydrogenase [Salmonella enterica sub	-2
665		gi|16766704|ref|NP_462319.1| DNA-directed RNA polymerase subunit alpha [Salmone	-2
666		gi|16766798|ref|NP_462413.1| gluconate periplasmic binding protein [Salmonella	-2
667		gi|16766891|ref|NP_462506.1| phage endolysin [Salmonella enterica subsp. enteri	-2
668		gi|16766904|ref|NP_462519.1| cellulose synthase regulator protein [Salmonella e	-2
669		gi|16766972|ref|NP_462587.1| mannitol repressor protein [Salmonella enterica su	-2
670		gi|16767025|ref|NP_462640.1| guanylate kinase [Salmonella enterica subsp. enter	-2
671		gi|16767224|ref|NP_462839.1| hypothetical protein STM3954 [Salmonella enterica	-2
672		gi|16767337|ref|NP_462952.1| mannose-6-phosphate isomerase [Salmonella enterica	-2
673		gi|16767426|ref|NP_463041.1| zinc resistance protein [Salmonella enterica subsp	-2
674		gi|16767496|ref|NP_463111.1| replicative DNA helicase [Salmonella enterica subs	-2
675		gi|16767660|ref|NP_463275.1| inorganic pyrophosphatase [Salmonella enterica sub	-2
676		gi|16767722|ref|NP_463337.1| leucyl aminopeptidase [Salmonella enterica subsp.	-2
677		gi|16763417|ref|NP_459032.1| fimbrial chaperone [Salmonella enterica subsp. ent	-1
678		gi|16763420|ref|NP_459035.1| transcriptional regulator [Salmonella enterica sub	-1
679		gi|16763423|ref|NP_459038.1| 5'-nucleotidase [Salmonella enterica subsp. enteri	-1
680		gi|16763438|ref|NP_459053.1| FKBP-type peptidyl-prolyl cis-trans isomerase [Sal	-1
681		gi|16763441|ref|NP_459056.1| ribonucleoside hydrolase RihC [Salmonella enterica	-1
682		gi|16763480|ref|NP_459095.1| dimethyladenosine transferase [Salmonella enterica	-1
683		gi|16763561|ref|NP_459176.1| carbonic anhydrase [Salmonella enterica subsp. ent	-1
684		gi|16763580|ref|NP_459195.1| penicillin-binding protein 1b [Salmonella enterica	-1
685		gi|16763604|ref|NP_459219.1| PII uridylyl-transferase [Salmonella enterica subs	-1
686		gi|16763610|ref|NP_459225.1| 1-deoxy-D-xylulose 5-phosphate reductoisomerase [S	-1
687		gi|16763666|ref|NP_459281.1| inner membrane protein [Salmonella enterica subsp.	-1
688		gi|16763667|ref|NP_459282.1| Shiga-like toxin A subunit [Salmonella enterica su	-1
689		gi|16763678|ref|NP_459293.1| cytoplasmic protein [Salmonella enterica subsp. en	-1
690		gi|16763697|ref|NP_459312.1| peptide chain release factor-like protein [Salmone	-1
691		gi|16763725|ref|NP_459340.1| inner membrane protein [Salmonella enterica subsp.	-1
692		gi|16763743|ref|NP_459358.1| transcriptional regulator [Salmonella enterica sub	-1
693		gi|308065971|ref|NP_459370.2| beta-lactam binding protein AmpH [Salmonella ente	-1
694		gi|16763766|ref|NP_459381.1| pyrroline-5-carboxylate reductase [Salmonella ente	-1
695		gi|16763769|ref|NP_459384.1| hypothetical protein STM0389 [Salmonella enterica	-1
696		gi|16763770|ref|NP_459385.1| hypothetical protein STM0390 [Salmonella enterica	-1
697		gi|16763781|ref|NP_459396.1| maltodextrin glucosidase [Salmonella enterica subs	-1
698		gi|16763833|ref|NP_459448.1| peptidyl-prolyl cis-trans isomerase (rotamase D) [	-1
699		gi|16763849|ref|NP_459464.1| 50S ribosomal protein L31 type B [Salmonella enter	-1
700		gi|16763891|ref|NP_459506.1| ABC-type transport system ATPase component [Salmon	-1
701		gi|16763908|ref|NP_459523.1| ureidoglycolate dehydrogenase [Salmonella enterica	-1
702		gi|16763927|ref|NP_459542.1| minor fimbrial subunit [Salmonella enterica subsp.	-1
703		gi|16763936|ref|NP_459551.1| glycosyltransferase [Salmonella enterica subsp. en	-1
704		gi|16763971|ref|NP_459586.1| iron-enterobactin transporter periplasmic binding	-1
705		gi|16763972|ref|NP_459587.1| isochorismate synthase [Salmonella enterica subsp.	-1
706		gi|16764027|ref|NP_459642.1| hydrolas [Salmonella enterica subsp. enterica sero	-1
707		gi|16764031|ref|NP_459646.1| TPR repeat-containing protein [Salmonella enterica	-1
708		gi|16764035|ref|NP_459650.1| molecular chaperone [Salmonella enterica subsp. en	-1
709		gi|16764075|ref|NP_459690.1| potassium-transporting ATPase subunit B [Salmonell	-1
710		gi|16764096|ref|NP_459711.1| glycosyl transferase [Salmonella enterica subsp. e	-1
711		gi|16764143|ref|NP_459758.1| DNA-binding transcriptional regulator ModE [Salmon	-1
712		gi|16764149|ref|NP_459764.1| 6-phosphogluconolactonase [Salmonella enterica sub	-1
713		gi|16764150|ref|NP_459765.1| pectinesterase [Salmonella enterica subsp. enteric	-1
714		gi|16764189|ref|NP_459804.1| hypothetical protein STM0827 [Salmonella enterica	-1
715		gi|16764234|ref|NP_459849.1| glutaredoxin 1 [Salmonella enterica subsp. enteric	-1
716		gi|16764253|ref|NP_459868.1| lipoprotein [Salmonella enterica subsp. enterica s	-1
717		gi|16764275|ref|NP_459890.1| hypothetical protein STM0913 [Salmonella enterica	-1
718		gi|16764283|ref|NP_459898.1| minor tail protein [Salmonella phage Fels-1]	-1
719		gi|16764296|ref|NP_459911.1| L-threonine aldolase [Salmonella enterica subsp. e	-1
720		gi|16764299|ref|NP_459914.1| hydroxylamine reductase [Salmonella enterica subsp	-1
721		gi|16764377|ref|NP_459992.1| hypothetical protein STM1017 [Phage Gifsy-2]	-1
722		gi|16764382|ref|NP_459997.1| molecular chaperone [Phage Gifsy-2]	-1
723		gi|16764385|ref|NP_460000.1| hypothetical protein STM1025 [Salmonella enterica	-1
724		gi|16764398|ref|NP_460013.1| major tail protein [Phage Gifsy-2]	-1
725		gi|16764424|ref|NP_460039.1| outer membrane protein [Salmonella enterica subsp.	-1
726		gi|16764430|ref|NP_460045.1| SOS cell division inhibitor [Salmonella enterica s	-1
727		gi|16764475|ref|NP_460090.1| glucose-1-phosphatase/inositol phosphatase [Salmon	-1
728		gi|16764503|ref|NP_460118.1| hypothetical protein STM1147 [Salmonella enterica	-1
729		gi|16764536|ref|NP_460151.1| flagellar basal body L-ring protein [Salmonella en	-1
730		gi|16764547|ref|NP_460162.1| glycerol-3-phosphate acyltransferase PlsX [Salmone	-1
731		gi|16764561|ref|NP_460176.1| outer membrane lipoprotein [Salmonella enterica su	-1
732		gi|16764565|ref|NP_460180.1| hypothetical protein STM1210 [Salmonella enterica	-1
733		gi|16764601|ref|NP_460216.1| lysozyme inhibitor [Salmonella enterica subsp. ent	-1
734		gi|16764618|ref|NP_460233.1| cytoplasmic protein [Salmonella enterica subsp. en	-1
735		gi|16764633|ref|NP_460248.1| cytoplasmic protein [Salmonella enterica subsp. en	-1
736		gi|161353604|ref|NP_460287.2| hypothetical protein STM1321 [Salmonella enterica	-1
737		gi|16764686|ref|NP_460301.1| 50S ribosomal protein L35 [Salmonella enterica sub	-1
738		gi|16764700|ref|NP_460315.1| phosphoenolpyruvate synthase [Salmonella enterica	-1
739		gi|16764717|ref|NP_460332.1| cytoplasmic protein [Salmonella enterica subsp. en	-1
740	SseD	gi|16764751|ref|NP_460366.1| translocation machinery component [Salmonella ente	-1
741		gi|16764776|ref|NP_460391.1| inner membrane transport protein YdhC [Salmonella	-1
742		gi|16764845|ref|NP_460460.1| outer membrane protein [Salmonella enterica subsp.	-1
743		gi|16764890|ref|NP_460505.1| multidrug efflux protein [Salmonella enterica subs	-1
744		gi|16764894|ref|NP_460509.1| translation initiation inhibitor [Salmonella enter	-1
745		gi|16764914|ref|NP_460529.1| formate dehydorgenase-N alpha subunit [Salmonella	-1
746		gi|16764933|ref|NP_460548.1| NADP-dependent oxidoreductase [Salmonella enterica	-1
747		gi|16764942|ref|NP_460557.1| regulatory protein [Salmonella enterica subsp. ent	-1
748		gi|16764955|ref|NP_460570.1| ribosomal-protein-L7/L12-serine acetyltransferase	-1
749		gi|16764961|ref|NP_460576.1| epimerase [Salmonella enterica subsp. enterica ser	-1
750		gi|16764964|ref|NP_460579.1| oxidase [Salmonella enterica subsp. enterica serov	-1
751		gi|16764965|ref|NP_460580.1| periplasmic protein [Salmonella enterica subsp. en	-1
752		gi|16764969|ref|NP_460584.1| transcriptional regulator [Salmonella enterica sub	-1
753		gi|16765050|ref|NP_460665.1| translation initiation factor Sui1 [Salmonella ent	-1
754		gi|16765059|ref|NP_460674.1| hypothetical protein STM1715 [Salmonella enterica	-1
755		gi|16765069|ref|NP_460684.1| bifunctional indole-3-glycerol phosphate synthase/	-1
756		gi|16765073|ref|NP_460688.1| cytoplasmic protein [Salmonella enterica subsp. en	-1
757		gi|16765074|ref|NP_460689.1| cytoplasmic protein [Salmonella enterica subsp. en	-1
758		gi|16765105|ref|NP_460720.1| nitrate reductase 1 alpha subunit [Salmonella ente	-1
759		gi|16765118|ref|NP_460733.1| glutamyl-tRNA reductase [Salmonella enterica subsp	-1
760		gi|16765125|ref|NP_460740.1| GTP-dependent nucleic acid-binding protein EngD [S	-1
761		gi|16765131|ref|NP_460746.1| hydrogenase-1 operon protein HyaE [Salmonella ente	-1
762		gi|16765137|ref|NP_460752.1| trehalase [Salmonella enterica subsp. enterica ser	-1
763		gi|16765161|ref|NP_460776.1| molecular chaperone [Salmonella enterica subsp. en	-1
764		gi|16765190|ref|NP_460805.1| inner membrane protein [Salmonella enterica subsp.	-1
765		gi|16765254|ref|NP_460869.1| flagellar protein [Salmonella enterica subsp. ente	-1
766		gi|16765296|ref|NP_460911.1| lysine-N-methylase [Salmonella enterica subsp. ent	-1
767		gi|16765332|ref|NP_460947.1| cold-shock protein [Salmonella enterica subsp. ent	-1
768		gi|16765371|ref|NP_460986.1| propanediol dehydratase medium subunit [Salmonella	-1
769		gi|16765437|ref|NP_461052.1| GDP-mannose mannosyl hydrolase [Salmonella enteric	-1
770		gi|16765455|ref|NP_461070.1| chaperone [Salmonella enterica subsp. enterica ser	-1
771		gi|16765457|ref|NP_461072.1| multidrug efflux system subunit MdtB [Salmonella e	-1
772		gi|16765493|ref|NP_461108.1| ABC-type proline/glycine betaine transport system	-1
773		gi|16765520|ref|NP_461135.1| galactose transport protein [Salmonella enterica s	-1
774		gi|16765526|ref|NP_461141.1| L-serine dehydratase [Salmonella enterica subsp. e	-1
775		gi|16765570|ref|NP_461185.1| phage tail fiber protein [Salmonella enterica subs	-1
776		gi|16765623|ref|NP_461238.1| aluminum-inducible protein [Salmonella enterica su	-1
777		gi|16765637|ref|NP_461252.1| menaquinone-specific isochorismate synthase [Salmo	-1
778		gi|16765641|ref|NP_461256.1| chemotaxis signal transduction protein [Salmonella	-1
779		gi|16765679|ref|NP_461294.1| histidine/lysine/arginine/ornithine transport prot	-1
780		gi|16765683|ref|NP_461298.1| 3-octaprenyl-4-hydroxybenzoate carboxy-lyase [Salm	-1
781		gi|16765699|ref|NP_461314.1| hypothetical protein STM2372 [Salmonella enterica	-1
782		gi|16765710|ref|NP_461325.1| penicillin-insensitive murein endopeptidase [Salmo	-1
783		gi|16765809|ref|NP_461424.1| dihydrodipicolinate synthase [Salmonella enterica	-1
784		gi|16765834|ref|NP_461449.1| outer membrane protein [Salmonella enterica subsp.	-1
785		gi|16765836|ref|NP_461451.1| outer membrane protein [Salmonella enterica subsp.	-1
786		gi|16765846|ref|NP_461461.1| nucleoside diphosphate kinase [Salmonella enterica	-1
787		gi|16765849|ref|NP_461464.1| anaerobic dimethylsulfoxide reductase [Salmonella	-1
788		gi|16765855|ref|NP_461470.1| enhanced serine sensitivity protein SseB [Salmonel	-1
789		gi|16765868|ref|NP_461483.1| anaerobic sulfide reductase [Salmonella enterica s	-1
790		gi|16765895|ref|NP_461510.1| transcriptional regulator [Salmonella enterica sub	-1
791		gi|16765907|ref|NP_461522.1| phage tail assembly-like protein [Salmonella enter	-1
792		gi|16765943|ref|NP_461558.1| hypothetical protein STM2623 [Salmonella enterica	-1
793		gi|16765951|ref|NP_461566.1| hypothetical protein STM2631 [Phage Gifsy-1]	-1
794		gi|16765964|ref|NP_461579.1| transcriptional regulator [Salmonella enterica sub	-1
795		gi|16766002|ref|NP_461617.1| hypothetical protein STM2687 [Salmonella enterica	-1
796		gi|16766064|ref|NP_461679.1| glucitol-specific PTS enzyme III [Salmonella enter	-1
797	PipB2	gi|16766091|ref|NP_461706.1| secreted effector protein [Salmonella enterica sub	-1
798		gi|16766094|ref|NP_461709.1| nickel transporter [Salmonella enterica subsp. ent	-1
799		gi|16766101|ref|NP_461716.1| hydroxyglutarate oxidase [Salmonella enterica subs	-1
800		gi|16766104|ref|NP_461719.1| gamma-aminobutyrate transporter [Salmonella enteri	-1
801		gi|16766112|ref|NP_461727.1| hypothetical protein STM2801 [Salmonella enterica	-1
802		gi|16766126|ref|NP_461741.1| multidrug transport protein [Salmonella enterica s	-1
803		gi|16766137|ref|NP_461752.1| murein hydrolase B [Salmonella enterica subsp. ent	-1
804	InvJ	gi|16766198|ref|NP_461813.1| needle length control protein [Salmonella enterica	-1
805		gi|16766225|ref|NP_461840.1| regulatory protein [Salmonella enterica subsp. ent	-1
806		gi|16766229|ref|NP_461844.1| cytoplasmic protein [Salmonella enterica subsp. en	-1
807		gi|16766242|ref|NP_461857.1| alkaline phosphatase isozyme conversion aminopepti	-1
808		gi|16766258|ref|NP_461873.1| phosphopyruvate hydratase [Salmonella enterica sub	-1
809		gi|16766277|ref|NP_461892.1| exonuclease IX [Salmonella enterica subsp. enteric	-1
810		gi|16766326|ref|NP_461941.1| nickel/cobalt efflux protein RcnA [Salmonella ente	-1
811		gi|39546355|ref|NP_461946.2| fimbrial-like protein [Salmonella enterica subsp.	-1
812		gi|16766346|ref|NP_461961.1| flavodoxin FldB [Salmonella enterica subsp. enteri	-1
813		gi|16766386|ref|NP_462001.1| outer membrane lipoprotein [Salmonella enterica su	-1
814		gi|16766403|ref|NP_462018.1| hypothetical protein STM3102 [Salmonella enterica	-1
815		gi|16766445|ref|NP_462060.1| hydrogenase 2-specific chaperone [Salmonella enter	-1
816		gi|16766459|ref|NP_462074.1| biopolymer transport protein ExbB [Salmonella ente	-1
817		gi|16766468|ref|NP_462083.1| hypothetical protein STM3168 [Salmonella enterica	-1
818		gi|16766469|ref|NP_462084.1| periplasmic dicarboxylate-binding protein [Salmone	-1
819		gi|16766476|ref|NP_462091.1| outer membrane protein [Salmonella enterica subsp.	-1
820		gi|16766531|ref|NP_462146.1| hypothetical protein STM3232 [Salmonella enterica	-1
821		gi|16766560|ref|NP_462175.1| galactitol utilization operon transcriptional repr	-1
822		gi|16766579|ref|NP_462194.1| lipoprotein NlpI [Salmonella enterica subsp. enter	-1
823		gi|16766628|ref|NP_462243.1| cytosine permease [Salmonella enterica subsp. ente	-1
824		gi|16766637|ref|NP_462252.1| stringent starvation protein A [Salmonella enteric	-1
825		gi|16766641|ref|NP_462256.1| ATPase [Salmonella enterica subsp. enterica serova	-1
826		gi|16766668|ref|NP_462283.1| rod shape-determining protein MreC [Salmonella ent	-1
827		gi|16766718|ref|NP_462333.1| 50S ribosomal protein L24 [Salmonella enterica sub	-1
828		gi|16766730|ref|NP_462345.1| 30S ribosomal protein S10 [Salmonella enterica sub	-1
829		gi|16766732|ref|NP_462347.1| bacterioferritin [Salmonella enterica subsp. enter	-1
830		gi|16766753|ref|NP_462368.1| hypothetical protein STM3465 [Salmonella enterica	-1
831		gi|161353582|ref|NP_462401.2| Hsp33-like chaperonin [Salmonella enterica subsp.	-1
832		gi|16766803|ref|NP_462418.1| transcriptional regulator MalT [Salmonella enteric	-1
833		gi|16766806|ref|NP_462421.1| RNA 3'-terminal-phosphate cyclase [Salmonella ente	-1
834		gi|16766829|ref|NP_462444.1| gluconate operon transcriptional repressor [Salmon	-1
835		gi|16766835|ref|NP_462450.1| inner membrane protein [Salmonella enterica subsp.	-1
836		gi|16766836|ref|NP_462451.1| phosphotriesterase [Salmonella enterica subsp. ent	-1
837		gi|16766850|ref|NP_462465.1| high-affinity branched-chain amino acid transporte	-1
838		gi|16766892|ref|NP_462507.1| transcriptional regulator [Salmonella enterica sub	-1
839		gi|16766894|ref|NP_462509.1| tRNA-processing ribonuclease [Salmonella enterica	-1
840		gi|16766917|ref|NP_462532.1| dipeptide transport protein [Salmonella enterica s	-1
841		gi|16766926|ref|NP_462541.1| long polar fimbrial protein A precursor [Salmonell	-1
842		gi|16766928|ref|NP_462543.1| 3-methyl-adenine DNA glycosylase I [Salmonella ent	-1
843		gi|16766932|ref|NP_462547.1| 2-hydroxyacid dehydrogenase [Salmonella enterica s	-1
844		gi|16766935|ref|NP_462550.1| major cold shock protein [Salmonella enterica subs	-1
845		gi|16766985|ref|NP_462600.1| NAD(P)H-dependent glycerol-3-phosphate dehydrogena	-1
846		gi|16766999|ref|NP_462614.1| hexose transferase [Salmonella enterica subsp. ent	-1
847		gi|16767006|ref|NP_462621.1| lipopolysaccharide core biosynthetic protein [Salm	-1
848		gi|16767045|ref|NP_462660.1| inner membrane protein [Salmonella enterica subsp.	-1
849		gi|16767077|ref|NP_462692.1| sugar kinase [Salmonella enterica subsp. enterica	-1
850		gi|16767110|ref|NP_462725.1| TMAO reductase system periplasmic protein TorT [Sa	-1
851		gi|16767126|ref|NP_462741.1| hypothetical protein STM3841 [Salmonella enterica	-1
852		gi|16767141|ref|NP_462756.1| phosphate ABC transporter periplasmic substrate-bi	-1
853		gi|16767165|ref|NP_462780.1| D-ribose pyranase [Salmonella enterica subsp. ente	-1
854		gi|16767234|ref|NP_462849.1| metE/metH regulator [Salmonella enterica subsp. en	-1
855		gi|16767243|ref|NP_462858.1| twin arginine translocase protein A [Salmonella en	-1
856		gi|39546384|ref|NP_462900.2| aldose-1-epimerase [Salmonella enterica subsp. ent	-1
857		gi|16767364|ref|NP_462979.1| arylsulfate sulfotransferase [Salmonella enterica	-1
858		gi|16767375|ref|NP_462990.1| fructose-6-phosphate aldolase [Salmonella enterica	-1
859		gi|16767453|ref|NP_463068.1| phage baseplate protein [Salmonella enterica subsp	-1
860		gi|16767464|ref|NP_463079.1| cytoplasmic protein [Salmonella enterica subsp. en	-1
861		gi|16767465|ref|NP_463080.1| cytoplasmic protein [Salmonella enterica subsp. en	-1
862		gi|16767468|ref|NP_463083.1| inner membrane protein [Salmonella enterica subsp.	-1
863		gi|39546392|ref|NP_463084.2| cytoplasmic protein [Salmonella enterica subsp. en	-1
864		gi|16767559|ref|NP_463174.1| hypothetical protein STM4309 [Salmonella enterica	-1
865		gi|16767566|ref|NP_463181.1| cytoplasmic protein [Salmonella enterica subsp. en	-1
866		gi|161353574|ref|NP_463213.2| ribosome-associated GTPase [Salmonella enterica s	-1
867		gi|16767673|ref|NP_463288.1| endonuclease [Salmonella enterica subsp. enterica	-1
868		gi|16767685|ref|NP_463300.1| cytochrome b562 [Salmonella enterica subsp. enteri	-1
869		gi|16767697|ref|NP_463312.1| anaerobic ribonucleotide reductase-activating prot	-1
870		gi|16767700|ref|NP_463315.1| trehalose repressor [Salmonella enterica subsp. en	-1
871		gi|16767701|ref|NP_463316.1| magnesium-transporting ATPase MgtA [Salmonella ent	-1
872		gi|16767726|ref|NP_463341.1| L-idonate regulator [Salmonella enterica subsp. en	-1
873		gi|16767730|ref|NP_463345.1| D-gluconate kinase [Salmonella enterica subsp. ent	-1
874		gi|16767750|ref|NP_463365.1| dienelactone hydrolase [Salmonella enterica subsp.	-1
875		gi|16767773|ref|NP_463388.1| cytoplasmic protein [Salmonella enterica subsp. en	-1
876		gi|16767789|ref|NP_463404.1| hypothetical protein STM4545 [Salmonella enterica	-1
877		gi|16767791|ref|NP_463406.1| transcriptional regulator [Salmonella enterica sub	-1
878		gi|16767816|ref|NP_463431.1| outer membrane protein [Salmonella enterica subsp.	-1
879		gi|16767825|ref|NP_463440.1| NTPase [Salmonella enterica subsp. enterica serova	-1
880		gi|17233479|ref|NP_490506.1| putative outer membrane protein [Salmonella typhim	-1
881		gi|17233481|ref|NP_490508.1| chaperone [Salmonella typhimurium LT2]	-1
882		gi|17233492|ref|NP_490530.1| outer membrane protein [Salmonella typhimurium LT2	-1
883		gi|17233435|ref|NP_490554.1| single-strand DNA binding protein [Salmonella typh	-1
884		gi|17233438|ref|NP_490557.1| plasmid SOS inhibition protein B [Salmonella typhi	-1
885		gi|17233467|ref|NP_490587.1| conjugal transfer surface exclusion protein TraT [	-1
886		gi|17233472|ref|NP_490594.1| conjugal transfer fertility inhibition protein Fin	-1
887		gi|16763407|ref|NP_459022.1| hypothetical protein STM0017 [Salmonella enterica	0
888		gi|16763430|ref|NP_459045.1| transcriptional activator NhaR [Salmonella enteric	0
889		gi|16763432|ref|NP_459047.1| sodium galactoside symporter [Salmonella enterica	0
890		gi|16763538|ref|NP_459153.1| cytoplasmic protein [Salmonella enterica subsp. en	0
891		gi|16763702|ref|NP_459317.1| outer membrane phosphoporin protein E [Salmonella	0
892		gi|16763748|ref|NP_459363.1| 2-methylisocitrate lyase [Salmonella enterica subs	0
893		gi|16763800|ref|NP_459415.1| phosphatidylglycerophosphatase A [Salmonella enter	0
894		gi|16763827|ref|NP_459442.1| transcriptional regulator BolA [Salmonella enteric	0
895		gi|16763879|ref|NP_459494.1| DNA-binding transcriptional regulator CueR [Salmon	0
896		gi|16763948|ref|NP_459563.1| inner membrane protein [Salmonella enterica subsp.	0
897		gi|16763974|ref|NP_459589.1| 2,3-dihydro-2,3-dihydroxybenzoate synthetase [Salm	0
898		gi|16763996|ref|NP_459611.1| triphosphoribosyl-dephospho-CoA synthase [Salmonel	0
899		gi|16764216|ref|NP_459831.1| cytoplasmic protein [Salmonella enterica subsp. en	0
900		gi|16764243|ref|NP_459858.1| inner membrane protein [Salmonella enterica subsp.	0
901		gi|16764276|ref|NP_459891.1| phage tail component [Salmonella phage Fels-1]	0
902		gi|16764280|ref|NP_459895.1| minor tail protein [Salmonella phage Fels-1]	0
903		gi|16764404|ref|NP_460019.1| superoxide dismutase precursor [Salmonella enteric	0
904		gi|16764484|ref|NP_460099.1| transcriptional regulator [Salmonella enterica sub	0
905		gi|16764502|ref|NP_460117.1| periplasmic protein [Salmonella enterica subsp. en	0
906		gi|16764804|ref|NP_460419.1| electron transport complex protein RnfD [Salmonell	0
907		gi|16764848|ref|NP_460463.1| hypothetical protein STM1503 [Salmonella enterica	0
908		gi|16764967|ref|NP_460582.1| carboxylesterase [Salmonella enterica subsp. enter	0
909		gi|308065963|ref|NP_460737.2| sulfate transporter YchM [Salmonella enterica sub	0
910		gi|16765153|ref|NP_460768.1| hypothetical protein STM1812 [Salmonella enterica	0
911		gi|16765171|ref|NP_460786.1| mannose-specific enzyme IIAB [Salmonella enterica	0
912		gi|39546329|ref|NP_460815.2| cytoplasmic protein [Salmonella enterica subsp. en	0
913		gi|16765249|ref|NP_460864.1| copper homeostasis protein CutC [Salmonella enteri	0
914		gi|16765334|ref|NP_460949.1| DNA polymerase V subunit UmuD [Salmonella enterica	0
915		gi|16765447|ref|NP_461062.1| tyrosine phosphatase [Salmonella enterica subsp. e	0
916		gi|16765453|ref|NP_461068.1| diguanylate cyclase/phosphodiesterase [Salmonella	0
917		gi|16765468|ref|NP_461083.1| inner membrane protein [Salmonella enterica subsp.	0
918		gi|16765584|ref|NP_461199.1| citrate reductase cytochrome c-type subunit [Salmo	0
919		gi|39546339|ref|NP_461217.2| regulatory protein [Salmonella enterica subsp. ent	0
920		gi|16765697|ref|NP_461312.1| erythronate-4-phosphate dehydrogenase [Salmonella	0
921		gi|16765812|ref|NP_461427.1| glycerate kinase [Salmonella enterica subsp. enter	0
922		gi|16765860|ref|NP_461475.1| co-chaperone HscB [Salmonella enterica subsp. ente	0
923		gi|16765962|ref|NP_461577.1| transferase [Salmonella enterica subsp. enterica s	0
924		gi|16766009|ref|NP_461624.1| phage tail protein [Salmonella enterica subsp. ent	0
925		gi|16766026|ref|NP_461641.1| hypothetical protein STM2713 [Salmonella enterica	0
926		gi|16766128|ref|NP_461743.1| S-ribosylhomocysteinase [Salmonella enterica subsp	0
927		gi|16766178|ref|NP_461793.1| needle complex minor subunit [Salmonella enterica	0
928		gi|16766214|ref|NP_461829.1| cytoplasmic protein [Salmonella enterica subsp. en	0
929		gi|16766220|ref|NP_461835.1| nucleoside-diphosphate-sugar epimerase [Salmonella	0
930		gi|16766319|ref|NP_461934.1| 2-deoxy-D-gluconate 3-dehydrogenase [Salmonella en	0
931		gi|16766479|ref|NP_462094.1| NADPH-specific quinone oxidoreductase [Salmonella	0
932		gi|16766537|ref|NP_462152.1| inner membrane protein [Salmonella enterica subsp.	0
933		gi|16766736|ref|NP_462351.1| 30S ribosomal protein S7 [Salmonella enterica subs	0
934		gi|16766837|ref|NP_462452.1| gamma-glutamyltranspeptidase [Salmonella enterica	0
935		gi|16766871|ref|NP_462486.1| ABC transport protein [Salmonella enterica subsp.	0
936		gi|16766923|ref|NP_462538.1| long polar fimbrial protein [Salmonella enterica s	0
937		gi|16766990|ref|NP_462605.1| hypothetical protein STM3705 [Salmonella enterica	0
938		gi|16767184|ref|NP_462799.1| DNA-binding transcriptional regulator IlvY [Salmon	0
939		gi|16767212|ref|NP_462827.1| inner membrane protein [Salmonella enterica subsp.	0
940		gi|16767267|ref|NP_462882.1| cytoplasmic protein [Salmonella enterica subsp. en	0
941		gi|16767358|ref|NP_462973.1| ATP-dependent protease peptidase subunit [Salmonel	0
942		gi|16767367|ref|NP_462982.1| bifunctional aspartate kinase II/homoserine dehydr	0
943		gi|16767381|ref|NP_462996.1| fructose-like phosphotransferase EIIB subunit 3 [S	0
944		gi|16767415|ref|NP_463030.1| sulfur carrier protein ThiS [Salmonella enterica s	0
945		gi|16767504|ref|NP_463119.1| excinuclease ABC subunit A [Salmonella enterica su	0
946		gi|16767562|ref|NP_463177.1| hypothetical protein STM4312 [Salmonella enterica	0
947		gi|16767605|ref|NP_463220.1| DNA mismatch repair protein [Salmonella enterica s	0
948		gi|16767638|ref|NP_463253.1| primosomal replication protein N [Salmonella enter	0
949		gi|16767739|ref|NP_463354.1| type II restriction enzyme methylase subunit [Salm	0
950		gi|17233419|ref|NP_490523.1| putative inner membrane protein [Salmonella typhim	0
951		gi|17233426|ref|NP_490543.1| plasmid partition protein B [Salmonella typhimuriu	0
952		gi|17233436|ref|NP_490555.1| putative cytoplasmic protein [Salmonella typhimuri	0
953		gi|17233505|ref|NP_490591.1| putative cytoplasmic protein [Salmonella typhimuri	0
954		gi|16763392|ref|NP_459007.1| bifunctional aspartokinase I/homoserine dehydrogen	1
955		gi|16763393|ref|NP_459008.1| homoserine kinase [Salmonella enterica subsp. ente	1
956		gi|16763411|ref|NP_459026.1| fimbrial subunit [Salmonella enterica subsp. enter	1
957		gi|16763412|ref|NP_459027.1| fimbrial chaperone [Salmonella enterica subsp. ent	1
958		gi|16763427|ref|NP_459042.1| cytoplasmic protein [Salmonella enterica subsp. en	1
959		gi|16763429|ref|NP_459044.1| pH-dependent sodium/proton antiporter [Salmonella	1
960		gi|16763465|ref|NP_459080.1| electron transfer flavoprotein FixA [Salmonella en	1
961		gi|16763479|ref|NP_459094.1| ApaG [Salmonella enterica subsp. enterica serovar	1
962		gi|16763490|ref|NP_459105.1| cytoplasmic protein [Salmonella enterica subsp. en	1
963		gi|16763496|ref|NP_459111.1| thiamine transporter ATP-binding subunit [Salmonel	1
964		gi|16763532|ref|NP_459147.1| type IV pilin biogenesis protein [Salmonella enter	1
965		gi|16763545|ref|NP_459160.1| outer membrane protein [Salmonella enterica subsp.	1
966		gi|16763547|ref|NP_459162.1| outer membrane protein [Salmonella enterica subsp.	1
967		gi|16763554|ref|NP_459169.1| transcriptional regulator [Salmonella enterica sub	1
968		gi|16763581|ref|NP_459196.1| ferrichrome outer membrane transporter [Salmonella	1
969		gi|16763603|ref|NP_459218.1| 2,3,4,5-tetrahydropyridine-2,6-carboxylate N-succi	1
970		gi|16763633|ref|NP_459248.1| outer membrane lipoprotein [Salmonella enterica su	1
971		gi|16763654|ref|NP_459269.1| chaperone ATPase [Salmonella enterica subsp. enter	1
972		gi|16763663|ref|NP_459278.1| outer membrane lipoprotein [Salmonella enterica su	1
973		gi|16763673|ref|NP_459288.1| cytoplasmic protein [Salmonella enterica subsp. en	1
974		gi|16763696|ref|NP_459311.1| DNA polymerase IV [Salmonella enterica subsp. ente	1
975		gi|39546292|ref|NP_459323.2| permease [Salmonella enterica subsp. enterica sero	1
976		gi|16763716|ref|NP_459331.1| fimbrial chaperone [Salmonella enterica subsp. ent	1
977		gi|16763722|ref|NP_459337.1| periplasmic protein [Salmonella enterica subsp. en	1
978		gi|16763761|ref|NP_459376.1| inner membrane protein [Salmonella enterica subsp.	1
979		gi|16763764|ref|NP_459379.1| hypothetical protein STM0384 [Salmonella enterica	1
980		gi|16763767|ref|NP_459382.1| hypothetical protein STM0387 [Salmonella enterica	1
981		gi|16763824|ref|NP_459439.1| cytochrome o ubiquinol oxidase subunit II [Salmone	1
982		gi|16763837|ref|NP_459452.1| ABC transporter periplasmic binding protein [Salmo	1
983		gi|16763856|ref|NP_459471.1| acridine efflux pump [Salmonella enterica subsp. e	1
984		gi|16763866|ref|NP_459481.1| recombination protein RecR [Salmonella enterica su	1
985		gi|16763874|ref|NP_459489.1| bifunctional UDP-sugar hydrolase/5'-nucleotidase p	1
986		gi|16763893|ref|NP_459508.1| tRNA 2-selenouridine synthase [Salmonella enterica	1
987		gi|16763898|ref|NP_459513.1| hydroxypyruvate isomerase [Salmonella enterica sub	1
988		gi|308065939|ref|NP_459538.3| fimbrin [Salmonella enterica subsp. enterica sero	1
989		gi|16763945|ref|NP_459560.1| phenylalanine transporter [Salmonella enterica sub	1
990		gi|16763963|ref|NP_459578.1| enterobactin/ferric enterobactin esterase [Salmone	1
991		gi|16763976|ref|NP_459591.1| hypothetical protein STM0599 [Salmonella enterica	1
992		gi|16763990|ref|NP_459605.1| hydrogenase protein [Salmonella enterica subsp. en	1
993		gi|16763994|ref|NP_459609.1| ribonuclease I [Salmonella enterica subsp. enteric	1
994		gi|16764010|ref|NP_459625.1| lipoyl synthase [Salmonella enterica subsp. enteri	1
995		gi|16764025|ref|NP_459640.1| leucyl-tRNA synthetase [Salmonella enterica subsp.	1
996		gi|16764033|ref|NP_459648.1| molecular chaperone [Salmonella enterica subsp. en	1
997		gi|16764106|ref|NP_459721.1| 2-oxoglutarate dehydrogenase E1 component [Salmone	1
998		gi|16764113|ref|NP_459728.1| hypothetical protein STM0743 [Salmonella enterica	1
999		gi|16764142|ref|NP_459757.1| molybdenum transport ATP-binding protein ModF [Sal	1
1000		gi|16764145|ref|NP_459760.1| molybdate transporter periplasmic protein [Salmone	1
1001		gi|16764153|ref|NP_459768.1| histidine utilization repressor [Salmonella enteri	1
1002		gi|16764160|ref|NP_459775.1| dithiobiotin synthetase [Salmonella enterica subsp	1
1003		gi|161353607|ref|NP_459783.2| molybdopterin synthase small subunit [Salmonella	1
1004		gi|16764184|ref|NP_459799.1| ATP-dependent DNA helicase DinG [Salmonella enteri	1
1005		gi|16764187|ref|NP_459802.1| hypothetical protein STM0825 [Salmonella enterica	1
1006		gi|16764197|ref|NP_459812.1| manganese transport regulator MntR [Salmonella ent	1
1007		gi|16764225|ref|NP_459840.1| D-alanyl-D-alanine carboxypeptidase fraction C [Sa	1
1008		gi|16764231|ref|NP_459846.1| regulatory protein [Salmonella enterica subsp. ent	1
1009		gi|16764237|ref|NP_459852.1| ribosomal protein S6 modification protein [Salmone	1
1010		gi|16764240|ref|NP_459855.1| putrescine transporter ATP-binding subunit [Salmon	1
1011		gi|16764248|ref|NP_459863.1| arginine transport system component [Salmonella en	1
1012		gi|16764254|ref|NP_459869.1| integrase [Salmonella enterica subsp. enterica ser	1
1013		gi|16764262|ref|NP_459877.1| helicase [Salmonella phage Fels-1]	1
1014		gi|16764268|ref|NP_459883.1| hypothetical protein STM0906 [Salmonella phage Fel	1
1015		gi|16764281|ref|NP_459896.1| minor tail protein [Salmonella phage Fels-1]	1
1016		gi|16764286|ref|NP_459901.1| CuZn superoxide dismutase [Salmonella enterica sub	1
1017		gi|16764289|ref|NP_459904.1| phage tail assembly protein [Salmonella phage Fels	1
1018		gi|16764298|ref|NP_459913.1| HCP oxidoreductase, NADH-dependent [Salmonella ent	1
1019		gi|16764304|ref|NP_459919.1| macrolide transporter ATP-binding /permease protei	1
1020		gi|16764346|ref|NP_459961.1| cytoplasmic protein [Salmonella enterica subsp. en	1
1021		gi|16764357|ref|NP_459972.1| metallo-beta-lactamase [Salmonella enterica subsp.	1
1022		gi|16764369|ref|NP_459984.1| exodeoxyribonuclease [Salmonella enterica subsp. e	1
1023		gi|16764375|ref|NP_459990.1| replication protein [Phage Gifsy-2]	1
1024		gi|16764390|ref|NP_460005.1| hypothetical protein STM1030 [Phage Gifsy-2]	1
1025		gi|16764392|ref|NP_460007.1| hypothetical protein STM1032 [Phage Gifsy-2]	1
1026		gi|16764403|ref|NP_460018.1| attachment/invasion protein [Phage Gifsy-2]	1
1027		gi|16764405|ref|NP_460020.1| minor tail protein [Phage Gifsy-2]	1
1028		gi|16764410|ref|NP_460025.1| tail fiber assembly like-protein [Phage Gifsy-2]	1
1029		gi|16764435|ref|NP_460050.1| methylglyoxal synthase [Salmonella enterica subsp.	1
1030		gi|16764439|ref|NP_460054.1| SAM-dependent methyltransferase [Salmonella enteri	1
1031		gi|16764441|ref|NP_460056.1| regulatory protein [Salmonella enterica subsp. ent	1
1032		gi|16764447|ref|NP_460062.1| inner membrane protein [Salmonella enterica subsp.	1
1033		gi|16764450|ref|NP_460065.1| cytoplasmic protein [Salmonella enterica subsp. en	1
1034		gi|16764458|ref|NP_460073.1| 4-hydroxyphenylacetate catabolism [Salmonella ente	1
1035		gi|16764473|ref|NP_460088.1| suppression of copper sensitivity protein [Salmone	1
1036		gi|16764480|ref|NP_460095.1| periplasmic protein [Salmonella enterica subsp. en	1
1037		gi|16764513|ref|NP_460128.1| hypothetical protein STM1157 [Salmonella enterica	1
1038		gi|16764519|ref|NP_460134.1| dihydroorotase [Salmonella enterica subsp. enteric	1
1039		gi|16764525|ref|NP_460140.1| virulence protein [Salmonella enterica subsp. ente	1
1040		gi|16764537|ref|NP_460152.1| flagellar basal body P-ring protein [Salmonella en	1
1041		gi|16764538|ref|NP_460153.1| flagellar rod assembly protein/muramidase FlgJ [Sa	1
1042		gi|16764560|ref|NP_460175.1| purine nucleoside phosphoramidase [Salmonella ente	1
1043		gi|16764580|ref|NP_460195.1| spermidine/putrescine ABC transporter membrane pro	1
1044		gi|16764582|ref|NP_460197.1| peptidase T [Salmonella enterica subsp. enterica s	1
1045		gi|16764598|ref|NP_460213.1| cold shock-like protein [Salmonella enterica subsp	1
1046		gi|16764626|ref|NP_460241.1| hemolysin [Salmonella enterica subsp. enterica ser	1
1047		gi|16764629|ref|NP_460244.1| amino acid/amine transport protein [Salmonella ent	1
1048		gi|16764630|ref|NP_460245.1| regulatory protein [Salmonella enterica subsp. ent	1
1049		gi|16764639|ref|NP_460254.1| aldehyde reductase [Salmonella enterica subsp. ent	1
1050		gi|16764640|ref|NP_460255.1| aldose 1-epimerase [Salmonella enterica subsp. ent	1
1051		gi|16764644|ref|NP_460259.1| nicotinamidase/pyrazinamidase [Salmonella enterica	1
1052		gi|16764656|ref|NP_460271.1| succinylglutamic semialdehyde dehydrogenase [Salmo	1
1053		gi|16764677|ref|NP_460292.1| 6-phosphofructokinase 2 [Salmonella enterica subsp	1
1054		gi|16764728|ref|NP_460343.1| pyruvate kinase [Salmonella enterica subsp. enteri	1
1055		gi|16764756|ref|NP_460371.1| type III secretion system apparatus protein [Salmo	1
1056		gi|16764761|ref|NP_460376.1| type III secretion system apparatus protein [Salmo	1
1057		gi|16764768|ref|NP_460383.1| type III secretion system protein [Salmonella ente	1
1058		gi|16764805|ref|NP_460420.1| electron transport complex protein RnfC [Salmonell	1
1059		gi|16764833|ref|NP_460448.1| pts operon transcriptional repressor [Salmonella e	1
1060		gi|16764838|ref|NP_460453.1| ABC transporter periplasmic component [Salmonella	1
1061		gi|16764861|ref|NP_460476.1| MFS-type transporter YdeE [Salmonella enterica sub	1
1062		gi|16764877|ref|NP_460492.1| dehydrogenase protein [Salmonella enterica subsp.	1
1063		gi|16764883|ref|NP_460498.1| hydrogenase-1 large subunit [Salmonella enterica s	1
1064		gi|16764887|ref|NP_460502.1| zinc-binding dehydrogenase [Salmonella enterica su	1
1065		gi|16764903|ref|NP_460518.1| glycosyl hydrolase [Salmonella enterica subsp. ent	1
1066		gi|16764929|ref|NP_460544.1| outer membrane lipoprotein [Salmonella enterica su	1
1067		gi|16764937|ref|NP_460552.1| virulence protein [Salmonella enterica subsp. ente	1
1068		gi|16764950|ref|NP_460565.1| benzoate membrane transport protein [Salmonella en	1
1069		gi|16764951|ref|NP_460566.1| outer membrane lipoprotein [Salmonella enterica su	1
1070		gi|16764962|ref|NP_460577.1| transcriptional repressor of sgc operon [Salmonell	1
1071		gi|16765005|ref|NP_460620.1| universal stress protein UspE [Salmonella enterica	1
1072		gi|16765043|ref|NP_460658.1| cytoplasmic protein [Salmonella enterica subsp. en	1
1073		gi|16765057|ref|NP_460672.1| transcriptional regulator CysB [Salmonella enteric	1
1074		gi|16765062|ref|NP_460677.1| cob(I)yrinic acid a,c-diamide adenosyltransferase	1
1075		gi|16765070|ref|NP_460685.1| tryptophan synthase subunit beta [Salmonella enter	1
1076		gi|16765081|ref|NP_460696.1| transport protein TonB [Salmonella enterica subsp.	1
1077		gi|16765101|ref|NP_460716.1| TPR repeat-containing protein [Salmonella enterica	1
1078		gi|16765127|ref|NP_460742.1| hydrogenase-1 small subunit [Salmonella enterica s	1
1079		gi|16765136|ref|NP_460751.1| glutamic dehyrogenase-like protein [Salmonella ent	1
1080		gi|16765139|ref|NP_460754.1| inner membrane protein [Salmonella enterica subsp.	1
1081		gi|16765140|ref|NP_460755.1| membrane-bound lytic murein transglycosylase E [Sa	1
1082		gi|16765156|ref|NP_460771.1| cell division inhibitor MinD [Salmonella enterica	1
1083		gi|16765162|ref|NP_460777.1| DNA helicase [Salmonella enterica subsp. enterica	1
1084		gi|16765176|ref|NP_460791.1| 23S rRNA methyltransferase A [Salmonella enterica	1
1085		gi|16765207|ref|NP_460822.1| PagK [Salmonella enterica subsp. enterica serovar	1
1086		gi|16765208|ref|NP_460823.1| phage-tail assembly-like protein [Salmonella enter	1
1087		gi|16765245|ref|NP_460860.1| hypothetical protein STM1903 [Salmonella enterica	1
1088		gi|16765251|ref|NP_460866.1| arginyl-tRNA synthetase [Salmonella enterica subsp	1
1089		gi|16765259|ref|NP_460874.1| chemotaxis-specific methylesterase [Salmonella ent	1
1090		gi|16765264|ref|NP_460879.1| flagellar motor protein MotB [Salmonella enterica	1
1091		gi|16765278|ref|NP_460893.1| tyrosine-specific transport protein [Salmonella en	1
1092		gi|16765348|ref|NP_460963.1| adenosylcobinamide kinase/adenosylcobinamide-phosp	1
1093		gi|16765360|ref|NP_460975.1| cobalt-precorrin-6Y C(15)-methyltransferase [Salmo	1
1094		gi|16765377|ref|NP_460992.1| propanediol utilization protein [Salmonella enteri	1
1095		gi|16765379|ref|NP_460994.1| polyhedral body protein [Salmonella enterica subsp	1
1096		gi|16765385|ref|NP_461000.1| polyhedral body protein [Salmonella enterica subsp	1
1097		gi|16765410|ref|NP_461025.1| UDP-glucose/GDP-mannose dehydrogenase [Salmonella	1
1098		gi|16765417|ref|NP_461032.1| abequosyltransferase [Salmonella enterica subsp. e	1
1099		gi|16765448|ref|NP_461063.1| outer membrane polysaccharide export protein [Salm	1
1100		gi|16765450|ref|NP_461065.1| assembly protein [Salmonella enterica subsp. enter	1
1101		gi|16765456|ref|NP_461071.1| multidrug efflux system subunit MdtA [Salmonella e	1
1102		gi|16765473|ref|NP_461088.1| sugar kinase [Salmonella enterica subsp. enterica	1
1103		gi|16765495|ref|NP_461110.1| transport protein [Salmonella enterica subsp. ente	1
1104		gi|16765508|ref|NP_461123.1| 1,2-dioxygenase [Salmonella enterica subsp. enteri	1
1105		gi|16765510|ref|NP_461125.1| transcriptional regulator [Salmonella enterica sub	1
1106		gi|16765609|ref|NP_461224.1| glycerophosphodiester phosphodiesterase [Salmonell	1
1107		gi|16765616|ref|NP_461231.1| aldolase [Salmonella enterica subsp. enterica sero	1
1108		gi|16765631|ref|NP_461246.1| polymyxin resistance protein B [Salmonella enteric	1
1109		gi|39546340|ref|NP_461258.2| NADH dehydrogenase subunit N [Salmonella enterica	1
1110		gi|16765672|ref|NP_461287.1| transcriptional regulator [Salmonella enterica sub	1
1111		gi|16765685|ref|NP_461300.1| cytoplasmic protein [Salmonella enterica subsp. en	1
1112		gi|16765689|ref|NP_461304.1| amidophosphoribosyltransferase [Salmonella enteric	1
1113		gi|16765720|ref|NP_461335.1| hypothetical protein STM2393 [Salmonella enterica	1
1114		gi|16765734|ref|NP_461349.1| manganese transport protein MntH [Salmonella enter	1
1115		gi|39546342|ref|NP_945166.1| hypothetical protein STM2420.1n [Salmonella enteri	1
1116		gi|16765765|ref|NP_461380.1| short chain dehydrogenase [Salmonella enterica sub	1
1117		gi|16765767|ref|NP_461382.1| hypothetical protein STM2447 [Salmonella enterica	1
1118		gi|16765779|ref|NP_461394.1| reactivating factor for ethanolamine ammonia lyase	1
1119		gi|16765787|ref|NP_461402.1| cobalamin adenosyltransferase [Salmonella enterica	1
1120		gi|16765794|ref|NP_461409.1| transketolase [Salmonella enterica subsp. enterica	1
1121		gi|16765803|ref|NP_461418.1| succinyl-diaminopimelate desuccinylase [Salmonella	1
1122		gi|16765807|ref|NP_461422.1| phosphoribosylaminoimidazole-succinocarboxamide sy	1
1123		gi|16765825|ref|NP_461440.1| inner membrane protein [Salmonella enterica subsp.	1
1124		gi|16765842|ref|NP_461457.1| histidyl-tRNA synthetase [Salmonella enterica subs	1
1125		gi|16765847|ref|NP_461462.1| polyferredoxin [Salmonella enterica subsp. enteric	1
1126		gi|16765859|ref|NP_461474.1| chaperone protein HscA [Salmonella enterica subsp.	1
1127		gi|16765900|ref|NP_461515.1| GTP-binding protein Era [Salmonella enterica subsp	1
1128		gi|16765905|ref|NP_461520.1| transposase-like protein [Phage Gifsy-1]	1
1129		gi|16765925|ref|NP_461540.1| phage head-like protein [Salmonella enterica subsp	1
1130		gi|16765945|ref|NP_461560.1| replication protein [Salmonella enterica subsp. en	1
1131		gi|16765952|ref|NP_461567.1| exodeoxyribonuclease VIII-like protein [Phage Gifs	1
1132		gi|16765970|ref|NP_461585.1| cytoplasmic protein [Salmonella enterica subsp. en	1
1133		gi|16765972|ref|NP_461587.1| phosphatidylserine synthase [Salmonella enterica s	1
1134		gi|16765979|ref|NP_461594.1| outer membrane protein assembly complex subunit Yf	1
1135		gi|16766013|ref|NP_461628.1| phage tail fiber-like protein [Salmonella enterica	1
1136		gi|16766022|ref|NP_461637.1| base plate tail-like protein [Salmonella enterica	1
1137		gi|16766044|ref|NP_461659.1| hypothetical protein STM2732 [Salmonella enterica	1
1138		gi|16766058|ref|NP_461673.1| ATPase [Salmonella enterica subsp. enterica serova	1
1139		gi|16766103|ref|NP_461718.1| 4-aminobutyrate aminotransferase [Salmonella enter	1
1140		gi|16766114|ref|NP_461729.1| regulatory protein [Salmonella enterica subsp. ent	1
1141		gi|16766119|ref|NP_461734.1| ribonucleotide-diphosphate reductase subunit beta	1
1142		gi|16766141|ref|NP_461756.1| sorbitol-6-phosphate dehydrogenase [Salmonella ent	1
1143		gi|16766149|ref|NP_461764.1| electron transport protein HydN [Salmonella enteri	1
1144		gi|16766173|ref|NP_461788.1| invasion regulatory protein [Salmonella enterica s	1
1145		gi|16766179|ref|NP_461794.1| needle complex major subunit [Salmonella enterica	1
1146		gi|16766196|ref|NP_461811.1| surface presentation of antigens protein SpaP [Sal	1
1147		gi|16766206|ref|NP_461821.1| needle complex outer membrane lipoprotein precurso	1
1148		gi|16766215|ref|NP_461830.1| DNA mismatch repair protein MutS [Salmonella enter	1
1149		gi|16766221|ref|NP_461836.1| hypothetical protein STM2915 [Salmonella enterica	1
1150		gi|16766239|ref|NP_461854.1| adenylylsulfate kinase [Salmonella enterica subsp.	1
1151		gi|16766260|ref|NP_461875.1| nucleoside triphosphate pyrophosphohydrolase [Salm	1
1152		gi|16766266|ref|NP_461881.1| d-glucarate dehydratase [Salmonella enterica subsp	1
1153		gi|16766280|ref|NP_461895.1| L-fucose isomerase [Salmonella enterica subsp. ent	1
1154		gi|16766302|ref|NP_461917.1| hypothetical protein STM3000 [Salmonella enterica	1
1155		gi|16766309|ref|NP_461924.1| peptide transport protein [Salmonella enterica sub	1
1156		gi|16766311|ref|NP_461926.1| lysophospholipid transporter LplT [Salmonella ente	1
1157		gi|16766318|ref|NP_461933.1| L-arabinose/proton symport protein [Salmonella ent	1
1158		gi|16766351|ref|NP_461966.1| hypothetical protein STM3050 [Salmonella enterica	1
1159		gi|16766366|ref|NP_461981.1| hypothetical protein STM3065 [Salmonella enterica	1
1160		gi|16766372|ref|NP_461987.1| DNA-binding protein [Salmonella enterica subsp. en	1
1161		gi|16766378|ref|NP_461993.1| Zn-dependent protease [Salmonella enterica subsp.	1
1162		gi|16766393|ref|NP_462008.1| hypothetical protein STM3092 [Salmonella enterica	1
1163		gi|16766402|ref|NP_462017.1| integral membrane protein [Salmonella enterica sub	1
1164		gi|16766418|ref|NP_462033.1| acetyl-CoA hydrolase [Salmonella enterica subsp. e	1
1165		gi|16766421|ref|NP_462036.1| transcriptional regulator [Salmonella enterica sub	1
1166		gi|16766426|ref|NP_462041.1| amino acid transporter [Salmonella enterica subsp.	1
1167		gi|16766428|ref|NP_462043.1| oxidoreductase [Salmonella enterica subsp. enteric	1
1168		gi|16766432|ref|NP_462047.1| xylanase/chitin deacetylase [Salmonella enterica s	1
1169		gi|16766438|ref|NP_462053.1| methyl-accepting chemotaxis protein [Salmonella en	1
1170		gi|16766440|ref|NP_462055.1| glutathione S-transferase YghU [Salmonella enteric	1
1171		gi|16766449|ref|NP_462064.1| hydrogenase 2 protein HybA [Salmonella enterica su	1
1172		gi|16766464|ref|NP_462079.1| alcohol dehydrogenase [Salmonella enterica subsp.	1
1173		gi|16766465|ref|NP_462080.1| 2,5-diketo-D-gluconate reductase A [Salmonella ent	1
1174		gi|16766487|ref|NP_462102.1| hypothetical protein STM3187 [Salmonella enterica	1
1175		gi|16766497|ref|NP_462112.1| glycogen synthesis protein GlgS [Salmonella enteri	1
1176		gi|16766516|ref|NP_462131.1| aerotaxis sensor receptor [Salmonella enterica sub	1
1177		gi|16766522|ref|NP_462137.1| dehydrogenase [Salmonella enterica subsp. enterica	1
1178		gi|16766546|ref|NP_462161.1| tartronate semialdehyde reductase [Salmonella ente	1
1179		gi|16766554|ref|NP_462169.1| phosphotransferase system mannitol/fructose-specif	1
1180		gi|16766576|ref|NP_462191.1| cytoplasmic protein [Salmonella enterica subsp. en	1
1181		gi|16766593|ref|NP_462208.1| 23S rRNA methyltransferase J [Salmonella enterica	1
1182		gi|16766596|ref|NP_462211.1| D-alanyl-D-alanine carboxypeptidase/endopeptidase	1
1183		gi|16766627|ref|NP_462242.1| cytoplasmic protein [Salmonella enterica subsp. en	1
1184		gi|16766643|ref|NP_462258.1| serine endoprotease [Salmonella enterica subsp. en	1
1185		gi|16766644|ref|NP_462259.1| serine endoprotease [Salmonella enterica subsp. en	1
1186		gi|39980859|ref|NP_951055.1| hypothetical protein STM3374.1n [Salmonella enteri	1
1187		gi|16766680|ref|NP_462295.1| DNA-binding protein Fis [Salmonella enterica subsp	1
1188		gi|16766691|ref|NP_462306.1| ribosome maturation factor [Salmonella enterica su	1
1189		gi|16766696|ref|NP_462311.1| methionyl-tRNA formyltransferase [Salmonella enter	1
1190		gi|16766773|ref|NP_462388.1| hypothetical protein STM3485 [Salmonella enterica	1
1191		gi|16766777|ref|NP_462392.1| inner membrane protein [Salmonella enterica subsp.	1
1192		gi|16766778|ref|NP_462393.1| inner membrane protein [Salmonella enterica subsp.	1
1193		gi|16766857|ref|NP_462472.1| cell division protein FtsY [Salmonella enterica su	1
1194		gi|16766864|ref|NP_462479.1| sulfur transfer protein SirA [Salmonella enterica	1
1195		gi|16766882|ref|NP_462497.1| cytoplasmic protein [Salmonella enterica subsp. en	1
1196		gi|16766901|ref|NP_462516.1| phosphodiesterase [Salmonella enterica subsp. ente	1
1197		gi|16766903|ref|NP_462518.1| endo-1,4-D-glucanase [Salmonella enterica subsp. e	1
1198		gi|16766906|ref|NP_462521.1| cell division protein [Salmonella enterica subsp.	1
1199		gi|16766949|ref|NP_462564.1| periplasmic alpha-amylase precursor [Salmonella en	1
1200		gi|16766969|ref|NP_462584.1| glutathione S-transferase [Salmonella enterica sub	1
1201		gi|16766973|ref|NP_462588.1| cytoplasmic protein [Salmonella enterica subsp. en	1
1202		gi|16766983|ref|NP_462598.1| permease [Salmonella enterica subsp. enterica sero	1
1203		gi|16767001|ref|NP_462616.1| lipopolysaccharide core biosynthesis protein [Salm	1
1204		gi|16767013|ref|NP_462628.1| 50S ribosomal protein L28 [Salmonella enterica sub	1
1205		gi|16767016|ref|NP_462631.1| deoxyuridine 5'-triphosphate nucleotidohydrolase [	1
1206		gi|16767022|ref|NP_462637.1| Zn-dependent hydrolase [Salmonella enterica subsp.	1
1207		gi|16767066|ref|NP_462681.1| PTS system galactitol-specific enzyme IIC componen	1
1208		gi|16767067|ref|NP_462682.1| periplasmic protein [Salmonella enterica subsp. en	1
1209		gi|16767091|ref|NP_462706.1| inner membrane protein [Salmonella enterica subsp.	1
1210		gi|16767107|ref|NP_462722.1| trimethylamine N-oxide reductase subunit [Salmonel	1
1211		gi|16767125|ref|NP_462740.1| ribonuclease P [Salmonella enterica subsp. enteric	1
1212		gi|16767127|ref|NP_462742.1| inner membrane protein translocase component YidC	1
1213		gi|16767149|ref|NP_462764.1| F0F1 ATP synthase subunit beta [Salmonella enteric	1
1214		gi|16767170|ref|NP_462785.1| transcriptional repressor RbsR [Salmonella enteric	1
1215		gi|16767188|ref|NP_462803.1| ATP-dependent DNA helicase Rep [Salmonella enteric	1
1216		gi|16767216|ref|NP_462831.1| outer membrane lipoprotein [Salmonella enterica su	1
1217		gi|16767240|ref|NP_462855.1| ubiquinone/menaquinone biosynthesis methyltransfer	1
1218		gi|16767296|ref|NP_462911.1| cytoplasmic protein [Salmonella enterica subsp. en	1
1219		gi|39546388|ref|NP_462913.2| regulatory protein [Salmonella enterica subsp. ent	1
1220		gi|16767311|ref|NP_462926.1| rhamnulose-1-phosphate aldolase [Salmonella enteri	1
1221		gi|16767320|ref|NP_462935.1| periplasmic dicarboxylate-binding protein [Salmone	1
1222		gi|16767331|ref|NP_462946.1| Na+/galactoside symporter [Salmonella enterica sub	1
1223		gi|16767344|ref|NP_462959.1| aldolase [Salmonella enterica subsp. enterica sero	1
1224		gi|16767347|ref|NP_462962.1| triosephosphate isomerase [Salmonella enterica sub	1
1225		gi|16767360|ref|NP_462975.1| DNA-binding transcriptional regulator CytR [Salmon	1
1226		gi|16767371|ref|NP_462986.1| 5,10-methylenetetrahydrofolate reductase [Salmonel	1
1227		gi|16767391|ref|NP_463006.1| DNA-binding transcriptional repressor FabR [Salmon	1
1228		gi|16767427|ref|NP_463042.1| sensor protein ZraS [Salmonella enterica subsp. en	1
1229		gi|16767436|ref|NP_463051.1| cytoplasmic protein [Salmonella enterica subsp. en	1
1230		gi|16767450|ref|NP_463065.1| phage tail fiber protein H [Salmonella enterica su	1
1231		gi|16767454|ref|NP_463069.1| inner membrane protein [Salmonella enterica subsp.	1
1232		gi|16767455|ref|NP_463070.1| phage glycosyltransferase [Salmonella enterica sub	1
1233		gi|16767457|ref|NP_463072.1| phage baseplate component [Salmonella enterica sub	1
1234		gi|16767477|ref|NP_463092.1| maltose transporter permease [Salmonella enterica	1
1235		gi|16767495|ref|NP_463110.1| quinone oxidoreductase, NADPH-dependent [Salmonell	1
1236		gi|16767508|ref|NP_463123.1| methyl-accepting chemotaxis protein [Salmonella en	1
1237		gi|16767513|ref|NP_463128.1| inner membrane protein [Salmonella enterica subsp.	1
1238		gi|16767519|ref|NP_463134.1| Na/H transport protein [Salmonella enterica subsp.	1
1239		gi|16767521|ref|NP_463136.1| inner membrane protein [Salmonella enterica subsp.	1
1240		gi|16767529|ref|NP_463144.1| formate-dependent nitrite reductase [Salmonella en	1
1241		gi|16767554|ref|NP_463169.1| sensory histidine kinase DcuS [Salmonella enterica	1
1242		gi|16767568|ref|NP_463183.1| acetyltransferase [Salmonella enterica subsp. ente	1
1243		gi|16767570|ref|NP_463185.1| regulatory protein [Salmonella enterica subsp. ent	1
1244		gi|16767594|ref|NP_463209.1| amino-acid transport protein [Salmonella enterica	1
1245		gi|16767604|ref|NP_463219.1| N-acetylmuramoyl-l-alanine amidase II [Salmonella	1
1246		gi|16767621|ref|NP_463236.1| inner membrane protein [Salmonella enterica subsp.	1
1247		gi|16767624|ref|NP_463239.1| inner membrane protein [Salmonella enterica subsp.	1
1248		gi|16767649|ref|NP_463264.1| bifunctional 2',3'-cyclic nucleotide 2'-phosphodie	1
1249		gi|16767682|ref|NP_463297.1| endonuclease [Salmonella enterica subsp. enterica	1
1250		gi|16767690|ref|NP_463305.1| inner membrane protein [Salmonella enterica subsp.	1
1251		gi|16767705|ref|NP_463320.1| aspartate carbamoyltransferase catalytic subunit [	1
1252		gi|39546402|ref|NP_463336.2| DNA polymerase III subunit chi [Salmonella enteric	1
1253		gi|16767744|ref|NP_463359.1| SAM-dependent methyltransferase [Salmonella enteri	1
1254		gi|16767751|ref|NP_463366.1| DNA-binding transcriptional repressor UxuR [Salmon	1
1255		gi|16767763|ref|NP_463378.1| NAD-dependent aldehyde dehydrogenase [Salmonella e	1
1256		gi|16767778|ref|NP_463393.1| transcriptional regulator [Salmonella enterica sub	1
1257		gi|39546406|ref|NP_463399.2| glucosamine-fructose-6-phosphate aminotransferase	1
1258		gi|16767787|ref|NP_463402.1| DNA replication protein DnaC [Salmonella enterica	1
1259		gi|16767793|ref|NP_463408.1| cytoplasmic protein [Salmonella enterica subsp. en	1
1260		gi|16767799|ref|NP_463414.1| ribosomal-protein-alanine N-acetyltransferase [Sal	1
1261		gi|16767812|ref|NP_463427.1| outer membrane protein [Salmonella enterica subsp.	1
1262		gi|16767813|ref|NP_463428.1| fimbrial usher protein [Salmonella enterica subsp.	1
1263		gi|16767817|ref|NP_463432.1| lipoate-protein ligase A [Salmonella enterica subs	1
1264	SpvD	gi|17233489|ref|NP_490527.1| hydrophilic protein [Salmonella typhimurium LT2]	1
1265		gi|17233439|ref|NP_490558.1| plasmid SOS inhibition protein A [Salmonella typhi	1
1266		gi|17233456|ref|NP_490576.1| conjugal transfer pilus assembly protein TraU [Sal	1
1267		gi|17233465|ref|NP_490585.1| conjugal transfer mating pair stabilization protei	1
1268		gi|16763428|ref|NP_459043.1| arylsulfatase [Salmonella enterica subsp. enterica	2
1269		gi|16763475|ref|NP_459090.1| glutathione-regulated potassium-efflux system anci	2
1270		gi|16763540|ref|NP_459155.1| aromatic amino acid transporter [Salmonella enteri	2
1271		gi|16763576|ref|NP_459191.1| RNA polymerase-binding transcription factor [Salmo	2
1272		gi|16763590|ref|NP_459205.1| minor fimbrial subunit [Salmonella enterica subsp.	2
1273		gi|16763649|ref|NP_459264.1| cytoplasmic protein [Salmonella enterica subsp. en	2
1274		gi|16763695|ref|NP_459310.1| periplasmic protein [Salmonella enterica subsp. en	2
1275		gi|16763712|ref|NP_459327.1| hydrolase/acyltransferase [Salmonella enterica sub	2
1276		gi|16763746|ref|NP_459361.1| hypothetical protein STM0366 [Salmonella enterica	2
1277		gi|16763794|ref|NP_459409.1| hypothetical protein STM0414 [Salmonella enterica	2
1278		gi|16763864|ref|NP_459479.1| DNA polymerase III subunits gamma and tau [Salmone	2
1279		gi|16763882|ref|NP_459497.1| ABC transporter ATP-binding protein YbbL [Salmonel	2
1280		gi|16763887|ref|NP_459502.1| ABC transporter ATP-binding protein YbbA [Salmonel	2
1281		gi|16764044|ref|NP_459659.1| transport protein [Salmonella enterica subsp. ente	2
1282		gi|16764088|ref|NP_459703.1| cytoplasmic protein [Salmonella enterica subsp. en	2
1283		gi|16764121|ref|NP_459736.1| quinolinate synthetase [Salmonella enterica subsp.	2
1284		gi|16764166|ref|NP_459781.1| molybdopterin biosynthetic protein B [Salmonella e	2
1285		gi|16764260|ref|NP_459875.1| hypothetical protein STM0898A [Salmonella phage Fe	2
1286		gi|16764273|ref|NP_459888.1| hypothetical protein STM0911 [Salmonella phage Fel	2
1287		gi|16764339|ref|NP_459954.1| Zn-dependent protease [Salmonella enterica subsp.	2
1288		gi|16764373|ref|NP_459988.1| regulatory protein [Phage Gifsy-2]	2
1289		gi|16764374|ref|NP_459989.1| regulatory protein [Phage Gifsy-2]	2
1290		gi|16764434|ref|NP_460049.1| DNA helicase IV [Salmonella enterica subsp. enteri	2
1291		gi|16764436|ref|NP_460051.1| hypothetical protein STM1077 [Salmonella enterica	2
1292		gi|16764479|ref|NP_460094.1| transcriptional repressor [Salmonella enterica sub	2
1293		gi|16764643|ref|NP_460258.1| cytoplasmic protein [Salmonella enterica subsp. en	2
1294		gi|16764661|ref|NP_460276.1| NAD synthetase [Salmonella enterica subsp. enteric	2
1295		gi|16764681|ref|NP_460296.1| DNA/RNA non-specific endonuclease [Salmonella ente	2
1296		gi|16764684|ref|NP_460299.1| threonyl-tRNA synthetase [Salmonella enterica subs	2
1297		gi|16764688|ref|NP_460303.1| phenylalanyl-tRNA synthetase subunit alpha [Salmon	2
1298		gi|16764699|ref|NP_460314.1| hypothetical protein STM1348 [Salmonella enterica	2
1299		gi|16764705|ref|NP_460320.1| electron transfer flavoprotein YdiQ [Salmonella en	2
1300		gi|16764780|ref|NP_460395.1| cell wall-associated hydrolase [Salmonella enteric	2
1301		gi|16764798|ref|NP_460413.1| pyridoxamine kinase [Salmonella enterica subsp. en	2
1302		gi|16764832|ref|NP_460447.1| transcriptional regulator [Salmonella enterica sub	2
1303		gi|16764947|ref|NP_460562.1| periplasmic protein [Salmonella enterica subsp. en	2
1304		gi|16765155|ref|NP_460770.1| septum formation inhibitor [Salmonella enterica su	2
1305		gi|16765269|ref|NP_460884.1| universal stress protein UspC [Salmonella enterica	2
1306		gi|308065961|ref|NP_460931.2| flagellar biosynthesis protein FliO [Salmonella e	2
1307		gi|16765373|ref|NP_460988.1| propanediol dehydratase reactivation protein [Salm	2
1308		gi|16765432|ref|NP_461047.1| colanic acid exporter [Salmonella enterica subsp.	2
1309		gi|39546338|ref|NP_461173.2| DNA polymerase V subunit [Salmonella enterica subs	2
1310		gi|16765592|ref|NP_461207.1| DNA repair system protein [Salmonella enterica sub	2
1311		gi|16765656|ref|NP_461271.1| cytoplasmic protein [Salmonella enterica subsp. en	2
1312		gi|16765681|ref|NP_461296.1| histidine transport protein [Salmonella enterica s	2
1313		gi|16765686|ref|NP_461301.1| amino acid transporter [Salmonella enterica subsp.	2
1314		gi|16765866|ref|NP_461481.1| inositol monophosphatase [Salmonella enterica subs	2
1315		gi|16765946|ref|NP_461561.1| replication protein 15-like [Salmonella enterica s	2
1316		gi|16765947|ref|NP_461562.1| cI-like protein [Salmonella enterica subsp. enteri	2
1317		gi|16765995|ref|NP_461610.1| cytoplasmic protein [Salmonella enterica subsp. en	2
1318		gi|16766031|ref|NP_461646.1| head completion-like protein [Salmonella enterica	2
1319		gi|16766048|ref|NP_461663.1| hypothetical protein STM2736 [Salmonella enterica	2
1320		gi|16766106|ref|NP_461721.1| LysM domain/BON superfamily protein [Salmonella en	2
1321		gi|16766226|ref|NP_461841.1| transcriptional regulator [Salmonella enterica sub	2
1322		gi|16766289|ref|NP_461904.1| FeS center assembly protein [Salmonella enterica s	2
1323		gi|16766364|ref|NP_461979.1| ribose-5-phosphate isomerase A [Salmonella enteric	2
1324		gi|16766493|ref|NP_462108.1| disulfide bond formation protein [Salmonella enter	2
1325		gi|16766542|ref|NP_462157.1| threonine/serine transporter TdcC [Salmonella ente	2
1326		gi|16766563|ref|NP_462178.1| hypothetical protein STM3265 [Salmonella enterica	2
1327		gi|16766590|ref|NP_462205.1| phosphoglucosamine mutase [Salmonella enterica sub	2
1328		gi|16766601|ref|NP_462216.1| DNA-binding transcriptional regulator Nlp [Salmone	2
1329		gi|16766703|ref|NP_462318.1| 50S ribosomal protein L17 [Salmonella enterica sub	2
1330		gi|16766825|ref|NP_462440.1| aspartate-semialdehyde dehydrogenase [Salmonella e	2
1331		gi|16766922|ref|NP_462537.1| long polar fimbrial minor protein [Salmonella ente	2
1332		gi|16766936|ref|NP_462551.1| hypothetical protein STM3650 [Salmonella enterica	2
1333		gi|16766947|ref|NP_462562.1| xylose operon regulatory protein [Salmonella enter	2
1334		gi|16766986|ref|NP_462601.1| preprotein translocase subunit SecB [Salmonella en	2
1335		gi|16767097|ref|NP_462712.1| heme lyase subunit [Salmonella enterica subsp. ent	2
1336		gi|16767197|ref|NP_462812.1| dTDP-glucose 4,6-dehydratase [Salmonella enterica	2
1337		gi|16767250|ref|NP_462865.1| outer membrane protein [Salmonella enterica subsp.	2
1338		gi|16767266|ref|NP_462881.1| ribosome biogenesis GTP-binding protein YsxC [Salm	2
1339		gi|39546389|ref|NP_462937.2| hypothetical protein STM4056.S [Salmonella enteric	2
1340		gi|16767446|ref|NP_463061.1| cytoplasmic protein [Salmonella enterica subsp. en	2
1341		gi|16767461|ref|NP_463076.1| phage tail protein [Salmonella enterica subsp. ent	2
1342		gi|16767475|ref|NP_463090.1| outer membrane lipoprotein [Salmonella enterica su	2
1343		gi|16767591|ref|NP_463206.1| fumarate reductase iron-sulfur subunit [Salmonella	2
1344		gi|16767657|ref|NP_463272.1| cytoplasmic protein [Salmonella enterica subsp. en	2
1345		gi|16767684|ref|NP_463299.1| peptidase PmbA [Salmonella enterica subsp. enteric	2
1346		gi|161353571|ref|NP_463358.2| hypothetical protein STM4499 [Salmonella enterica	2
1347		gi|16767746|ref|NP_463361.1| cytoplasmic protein [Salmonella enterica subsp. en	2
1348		gi|16767804|ref|NP_463419.1| phosphoesterase [Salmonella enterica subsp. enteri	2
1349		gi|17233493|ref|NP_490531.1| regulator of spv operon [Salmonella typhimurium LT	2
1350		gi|17233453|ref|NP_490573.1| conjugal transfer ATP-binding protein TraC [Salmon	2
1351		gi|17233464|ref|NP_490584.1| conjugal transfer pilus assembly protein TraH [Sal	2
1352		gi|16763400|ref|NP_459015.1| hypothetical protein STM0010 [Salmonella enterica	3
1353		gi|39546288|ref|NP_945153.1| hypothetical protein STM0028.1n [Salmonella enteri	3
1354		gi|16763435|ref|NP_459050.1| bifunctional riboflavin kinase/FMN adenylyltransfe	3
1355		gi|16763442|ref|NP_459057.1| transcriptional regulator [Salmonella enterica sub	3
1356		gi|16763456|ref|NP_459071.1| carbamoyl phosphate synthase small subunit [Salmon	3
1357		gi|16763466|ref|NP_459081.1| electron transfer flavoprotein FixB [Salmonella en	3
1358		gi|16763471|ref|NP_459086.1| secreted protein [Salmonella enterica subsp. enter	3
1359		gi|16763483|ref|NP_459098.1| organic solvent tolerance protein [Salmonella ente	3
1360		gi|16763484|ref|NP_459099.1| Dna-J like membrane chaperone protein [Salmonella	3
1361		gi|16763506|ref|NP_459121.1| acetolactate synthase 3 catalytic subunit [Salmone	3
1362		gi|16763530|ref|NP_459145.1| dephospho-CoA kinase [Salmonella enterica subsp. e	3
1363		gi|16763546|ref|NP_459161.1| periplasmic protein [Salmonella enterica subsp. en	3
1364		gi|16763550|ref|NP_459165.1| hypothetical protein STM0160 [Salmonella enterica	3
1365		gi|16763558|ref|NP_459173.1| multicopper oxidase [Salmonella enterica subsp. en	3
1366		gi|16763582|ref|NP_459197.1| iron-hydroxamate transporter ATP-binding subunit [	3
1367		gi|16763609|ref|NP_459224.1| ribosome recycling factor [Salmonella enterica sub	3
1368		gi|16763631|ref|NP_459246.1| prolyl-tRNA synthetase [Salmonella enterica subsp.	3
1369		gi|16763632|ref|NP_459247.1| regulatory protein [Salmonella enterica subsp. ent	3
1370		gi|16763668|ref|NP_459283.1| inner membrane protein [Salmonella enterica subsp.	3
1371		gi|16763689|ref|NP_459304.1| adhesin/invasin protein PagN [Salmonella enterica	3
1372		gi|16763694|ref|NP_459309.1| glutamine amidotransferase [Salmonella enterica su	3
1373		gi|16763703|ref|NP_459318.1| gamma-glutamyl kinase [Salmonella enterica subsp.	3
1374		gi|16763709|ref|NP_459324.1| isopropylmalate isomerase large subunit [Salmonell	3
1375		gi|16763729|ref|NP_459344.1| outer membrane lipoprotein [Salmonella enterica su	3
1376		gi|16763733|ref|NP_459348.1| cation transport ATPase [Salmonella enterica subsp	3
1377		gi|16763737|ref|NP_459352.1| DNA methylase [Salmonella enterica subsp. enterica	3
1378		gi|16763742|ref|NP_459357.1| cytoplasmic protein [Salmonella enterica subsp. en	3
1379		gi|16763760|ref|NP_459375.1| D-alanyl-alanine synthetase A [Salmonella enterica	3
1380		gi|16763765|ref|NP_459380.1| diguanylate cyclase AdrA [Salmonella enterica subs	3
1381		gi|16763776|ref|NP_459391.1| exonuclease subunit SbcD [Salmonella enterica subs	3
1382		gi|16763821|ref|NP_459436.1| cytochrome o ubiquinol oxidase subunit IV [Salmone	3
1383		gi|16763828|ref|NP_459443.1| trigger factor [Salmonella enterica subsp. enteric	3
1384		gi|16763843|ref|NP_459458.1| nitrogen regulatory protein P-II 2 [Salmonella ent	3
1385		gi|16763858|ref|NP_459473.1| potassium efflux protein KefA [Salmonella enterica	3
1386		gi|16763868|ref|NP_459483.1| adenylate kinase [Salmonella enterica subsp. enter	3
1387		gi|16763899|ref|NP_459514.1| tartronic semialdehyde reductase [Salmonella enter	3
1388		gi|16763911|ref|NP_459526.1| cytoplasmic protein [Salmonella enterica subsp. en	3
1389		gi|16763916|ref|NP_459531.1| peptidyl-prolyl cis-trans isomerase B (rotamase B)	3
1390		gi|16763928|ref|NP_459543.1| fimbrial protein [Salmonella enterica subsp. enter	3
1391		gi|16763940|ref|NP_459555.1| transcriptional regulator [Salmonella enterica sub	3
1392		gi|16763950|ref|NP_459565.1| inner membrane protein [Salmonella enterica subsp.	3
1393		gi|16763964|ref|NP_459579.1| cytoplasmic protein [Salmonella enterica subsp. en	3
1394		gi|16763979|ref|NP_459594.1| hypothetical protein STM0602 [Salmonella enterica	3
1395		gi|16763986|ref|NP_459601.1| alkyl hydroperoxide reductase F52a subunit [Salmon	3
1396		gi|16763991|ref|NP_459606.1| universal stress protein [Salmonella enterica subs	3
1397		gi|16764009|ref|NP_459624.1| twin arginine translocase protein E [Salmonella en	3
1398		gi|16764020|ref|NP_459635.1| alpha ribazole-5'-P phosphatase [Salmonella enteri	3
1399		gi|16764037|ref|NP_459652.1| cytoplasmic protein [Salmonella enterica subsp. en	3
1400		gi|16764053|ref|NP_459668.1| N-acetylglucosamine-6-phosphate deacetylase [Salmo	3
1401		gi|16764056|ref|NP_459671.1| glutaminyl-tRNA synthetase [Salmonella enterica su	3
1402		gi|16764058|ref|NP_459673.1| lipoprotein [Salmonella enterica subsp. enterica s	3
1403		gi|16764073|ref|NP_459688.1| sensor protein KdpD [Salmonella enterica subsp. en	3
1404		gi|16764081|ref|NP_459696.1| hydrolase-oxidase [Salmonella enterica subsp. ente	3
1405		gi|16764082|ref|NP_459697.1| carboxylase [Salmonella enterica subsp. enterica s	3
1406		gi|16764090|ref|NP_459705.1| glycosyl transferase [Salmonella enterica subsp. e	3
1407		gi|16764101|ref|NP_459716.1| inner membrane protein [Salmonella enterica subsp.	3
1408		gi|16764151|ref|NP_459766.1| imidazolonepropionase [Salmonella enterica subsp.	3
1409		gi|16764180|ref|NP_459795.1| ABC-type multidrug transport system ATPase compone	3
1410		gi|16764181|ref|NP_459796.1| hypothetical protein STM0818 [Salmonella enterica	3
1411		gi|16764182|ref|NP_459797.1| DNA-binding transcriptional regulator [Salmonella	3
1412		gi|16764200|ref|NP_459815.1| ABC transporter ATPase component [Salmonella enter	3
1413		gi|16764205|ref|NP_459820.1| pyruvate formate lyase [Salmonella enterica subsp.	3
1414		gi|16764209|ref|NP_459824.1| L-asparaginase [Salmonella enterica subsp. enteric	3
1415		gi|16764220|ref|NP_459835.1| dehydrogenase [Salmonella enterica subsp. enterica	3
1416		gi|16764229|ref|NP_459844.1| hydrolase [Salmonella enterica subsp. enterica ser	3
1417		gi|16764313|ref|NP_459928.1| transcriptional regulator [Salmonella enterica sub	3
1418		gi|16764323|ref|NP_459938.1| recombination factor protein RarA [Salmonella ente	3
1419		gi|16764353|ref|NP_459968.1| condesin subunit E [Salmonella enterica subsp. ent	3
1420		gi|16764366|ref|NP_459981.1| excisionase [Salmonella enterica subsp. enterica s	3
1421		gi|39546307|ref|NP_459983.2| hypothetical protein STM1008.S [Salmonella enteric	3
1422		gi|16764406|ref|NP_460021.1| tail assembly protein [Phage Gifsy-2]	3
1423		gi|16764408|ref|NP_460023.1| host specificity protein J [Phage Gifsy-2]	3
1424	SseI	gi|16764411|ref|NP_460026.1| secreted effector protein [Phage Gifsy-2]	3
1425		gi|16764437|ref|NP_460052.1| cytoplasmic protein [Salmonella enterica subsp. en	3
1426	PipB-1	gi|16764446|ref|NP_460061.1| secreted effector protein [Salmonella enterica sub	3
1427		gi|16764468|ref|NP_460083.1| hypothetical protein STM1110 [Salmonella enterica	3
1428		gi|16764470|ref|NP_460085.1| curved DNA-binding protein CbpA [Salmonella enteri	3
1429		gi|16764488|ref|NP_460103.1| outer membrane protein [Salmonella enterica subsp.	3
1430		gi|16764501|ref|NP_460116.1| autoagglutination protein [Salmonella enterica sub	3
1431		gi|161353564|ref|NP_460132.3| biofilm formation regulatory protein BssS [Salmon	3
1432		gi|16764544|ref|NP_460159.1| Maf-like protein [Salmonella enterica subsp. enter	3
1433		gi|16764549|ref|NP_460164.1| acyl carrier protein S-malonyltransferase [Salmone	3
1434		gi|16764557|ref|NP_460172.1| metallodependent hydrolase [Salmonella enterica su	3
1435		gi|16764558|ref|NP_460173.1| PTS system glucose-specific transporter subunits I	3
1436		gi|16764562|ref|NP_460177.1| outer membrane lipoprotein [Salmonella enterica su	3
1437		gi|16764573|ref|NP_460188.1| lipoprotein transporter ATP-binding subunit [Salmo	3
1438		gi|16764576|ref|NP_460191.1| NAD-dependent deacetylase [Salmonella enterica sub	3
1439		gi|16764648|ref|NP_460263.1| selenophosphate synthetase [Salmonella enterica su	3
1440		gi|16764651|ref|NP_460266.1| periplasmic protein [Salmonella enterica subsp. en	3
1441		gi|16764662|ref|NP_460277.1| DNA-binding transcriptional activator OsmE [Salmon	3
1442		gi|16764663|ref|NP_460278.1| PTS system N,N'-diacetylchitobiose-specific transp	3
1443		gi|16764692|ref|NP_460307.1| glutathione peroxidase [Salmonella enterica subsp.	3
1444		gi|16764706|ref|NP_460321.1| transcriptional regulator [Salmonella enterica sub	3
1445		gi|16764707|ref|NP_460322.1| acyl-CoA dehydrogenase [Salmonella enterica subsp.	3
1446		gi|16764714|ref|NP_460329.1| inner membrane protein [Salmonella enterica subsp.	3
1447		gi|16764719|ref|NP_460334.1| iron-sulfur cluster assembly scaffold protein [Sal	3
1448		gi|16764723|ref|NP_460338.1| bifunctional cysteine desulfurase/selenocysteine l	3
1449		gi|16764740|ref|NP_460355.1| regulatory protein [Salmonella enterica subsp. ent	3
1450		gi|16764744|ref|NP_460359.1| outer membrane secretin precursor [Salmonella ente	3
1451		gi|16764762|ref|NP_460377.1| type III secretion system apparatus protein [Salmo	3
1452		gi|16764764|ref|NP_460379.1| secretion system apparatus protein SsaV [Salmonell	3
1453		gi|16764785|ref|NP_460400.1| transcriptional repressor [Salmonella enterica sub	3
1454		gi|16764787|ref|NP_460402.1| aldo/keto reductase [Salmonella enterica subsp. en	3
1455		gi|161353603|ref|NP_460407.2| transcriptional regulator SlyA [Salmonella enteri	3
1456		gi|16764836|ref|NP_460451.1| proline/glycine betaine transport systems [Salmone	3
1457		gi|16764850|ref|NP_460465.1| dehydratase [Salmonella enterica subsp. enterica s	3
1458		gi|16764859|ref|NP_460474.1| competence damage-inducible protein A [Salmonella	3
1459		gi|16764879|ref|NP_460494.1| hydrogenase [Salmonella enterica subsp. enterica s	3
1460		gi|16764943|ref|NP_460558.1| periplasmic dipeptidase precursor [Salmonella ente	3
1461		gi|16764956|ref|NP_460571.1| cellulase protein [Salmonella enterica subsp. ente	3
1462		gi|16764980|ref|NP_460595.1| ABC-type transport system membrane component [Salm	3
1463		gi|16764984|ref|NP_460599.1| inner membrane protein [Salmonella enterica subsp.	3
1464		gi|16764993|ref|NP_460608.1| cytoplasmic protein [Salmonella enterica subsp. en	3
1465		gi|16764998|ref|NP_460613.1| C32 tRNA thiolase [Salmonella enterica subsp. ente	3
1466		gi|16765006|ref|NP_460621.1| inner membrane protein [Salmonella enterica subsp.	3
1467		gi|16765033|ref|NP_460648.1| phage shock protein PspA [Salmonella enterica subs	3
1468		gi|16765040|ref|NP_460655.1| hypothetical protein STM1697 [Salmonella enterica	3
1469		gi|16765049|ref|NP_460664.1| lipoprotein [Salmonella enterica subsp. enterica s	3
1470		gi|16765099|ref|NP_460714.1| hypothetical protein STM1755 [Salmonella enterica	3
1471		gi|16765106|ref|NP_460721.1| nitrite extrusion protein [Salmonella enterica sub	3
1472		gi|16765114|ref|NP_460729.1| transcriptional regulator [Salmonella enterica sub	3
1473		gi|16765119|ref|NP_460734.1| outer membrane lipoprotein LolB [Salmonella enteri	3
1474		gi|39546325|ref|NP_460739.2| peptidyl-tRNA hydrolase [Salmonella enterica subsp	3
1475		gi|16765129|ref|NP_460744.1| hydrogenase 1 b-type cytochrome subunit [Salmonell	3
1476		gi|16765146|ref|NP_460761.1| fatty acid metabolism regulator [Salmonella enteri	3
1477		gi|16765166|ref|NP_460781.1| hypothetical protein STM1825 [Salmonella enterica	3
1478		gi|16765175|ref|NP_460790.1| hypothetical protein STM1834 [Salmonella enterica	3
1479		gi|16765217|ref|NP_460832.1| hypothetical protein STM1875 [Salmonella enterica	3
1480		gi|16765219|ref|NP_460834.1| amidohydrolase [Salmonella enterica subsp. enteric	3
1481		gi|16765221|ref|NP_460836.1| protease 2 [Salmonella enterica subsp. enterica se	3
1482		gi|16765238|ref|NP_460853.1| cytoplasmic protein [Salmonella enterica subsp. en	3
1483		gi|16765239|ref|NP_460854.1| hypothetical protein STM1897 [Salmonella enterica	3
1484		gi|16765244|ref|NP_460859.1| hypothetical protein STM1902 [Salmonella enterica	3
1485		gi|16765273|ref|NP_460888.1| ferritin-like protein [Salmonella enterica subsp.	3
1486		gi|16765287|ref|NP_460902.1| hypothetical protein STM1949 [Salmonella enterica	3
1487		gi|16765288|ref|NP_460903.1| DNA-binding transcriptional activator SdiA [Salmon	3
1488		gi|16765299|ref|NP_460914.1| flagellar protein FliS [Salmonella enterica subsp.	3
1489		gi|16765317|ref|NP_460932.1| flagellar biosynthesis protein FliP [Salmonella en	3
1490		gi|16765319|ref|NP_460934.1| flagellar biosynthesis protein FliR [Salmonella en	3
1491		gi|39546333|ref|NP_460939.2| cytoplasmic protein [Salmonella enterica subsp. en	3
1492		gi|16765328|ref|NP_460943.1| DNA cytosine methylase [Salmonella enterica subsp.	3
1493		gi|16765343|ref|NP_460958.1| cytoplasmic protein [Salmonella enterica subsp. en	3
1494		gi|16765350|ref|NP_460965.1| cobalt transporter ATP-binding subunit [Salmonella	3
1495		gi|16765361|ref|NP_460976.1| cobalt-precorrin-6Y C(5)-methyltransferase [Salmon	3
1496		gi|16765363|ref|NP_460978.1| cobalt-precorrin-8X methylmutase [Salmonella enter	3
1497		gi|16765392|ref|NP_461007.1| D-alanyl-D-alanine carboxypeptidase [Salmonella en	3
1498		gi|16765402|ref|NP_461017.1| histidinol dehydrogenase [Salmonella enterica subs	3
1499		gi|16765406|ref|NP_461021.1| 1-(5-phosphoribosyl)-5-[(5-phosphoribosylamino)met	3
1500		gi|16765416|ref|NP_461031.1| mannosyl transferase [Salmonella enterica subsp. e	3
1501		gi|16765436|ref|NP_461051.1| glycosyl transferase [Salmonella enterica subsp. e	3
1502		gi|16765467|ref|NP_461082.1| cytoplasmic protein [Salmonella enterica subsp. en	3
1503		gi|16765476|ref|NP_461091.1| hydroxyethylthiazole kinase [Salmonella enterica s	3
1504		gi|16765483|ref|NP_461098.1| ATPase [Salmonella enterica subsp. enterica serova	3
1505		gi|16765497|ref|NP_461112.1| D-lactate dehydrogenase [Salmonella enterica subsp	3
1506		gi|16765516|ref|NP_461131.1| oxidoreductase [Salmonella enterica subsp. enteric	3
1507		gi|16765518|ref|NP_461133.1| beta-methylgalactoside transporter inner membrane	3
1508		gi|16765567|ref|NP_461182.1| phage antiterminator [Salmonella enterica subsp. e	3
1509		gi|16765575|ref|NP_461190.1| heme lyase subunit [Salmonella enterica subsp. ent	3
1510		gi|16765603|ref|NP_461218.1| 3-demethylubiquinone-9 3-methyltransferase [Salmon	3
1511		gi|16765625|ref|NP_461240.1| undecaprenyl phosphate 4-deoxy-4-formamido-L-arabi	3
1512		gi|16765666|ref|NP_461281.1| hypothetical protein STM2339 [Salmonella enterica	3
1513		gi|16765676|ref|NP_461291.1| glutathione S-transferase [Salmonella enterica sub	3
1514		gi|16765677|ref|NP_461292.1| sugar nucleotide epimerase [Salmonella enterica su	3
1515		gi|16765692|ref|NP_461307.1| bifunctional folylpolyglutamate synthase/ dihydrof	3
1516		gi|16765701|ref|NP_461316.1| regulatory protein [Salmonella enterica subsp. ent	3
1517		gi|16765702|ref|NP_461317.1| cytoplasmic protein [Salmonella enterica subsp. en	3
1518		gi|16765711|ref|NP_461326.1| chorismate synthase [Salmonella enterica subsp. en	3
1519		gi|16765712|ref|NP_461327.1| N5-glutamine S-adenosyl-L-methionine-dependent met	3
1520		gi|16765713|ref|NP_461328.1| hypothetical protein STM2386 [Salmonella enterica	3
1521		gi|16765714|ref|NP_461329.1| phosphohistidine phosphatase [Salmonella enterica	3
1522		gi|16765725|ref|NP_461340.1| transporter [Salmonella enterica subsp. enterica s	3
1523		gi|16765729|ref|NP_461344.1| glucokinase [Salmonella enterica subsp. enterica s	3
1524		gi|16765740|ref|NP_461355.1| DNA-binding transcriptional activator XapR [Salmon	3
1525		gi|16765743|ref|NP_461358.1| hypothetical protein STM2423 [Salmonella enterica	3
1526		gi|16765760|ref|NP_461375.1| cysteine synthase B [Salmonella enterica subsp. en	3
1527		gi|16765761|ref|NP_461376.1| sulfate/thiosulfate transporter subunit [Salmonell	3
1528		gi|16765783|ref|NP_461398.1| aldehyde oxidoreductase [Salmonella enterica subsp	3
1529		gi|16765795|ref|NP_461410.1| cytoplasmic protein [Salmonella enterica subsp. en	3
1530		gi|16765800|ref|NP_461415.1| nitrate/nitrite sensor protein NarQ [Salmonella en	3
1531		gi|16765820|ref|NP_461435.1| phosphoribosylglycinamide formyltransferase [Salmo	3
1532		gi|16765844|ref|NP_461459.1| cytoskeletal protein RodZ [Salmonella enterica sub	3
1533		gi|16765862|ref|NP_461477.1| scaffold protein [Salmonella enterica subsp. enter	3
1534		gi|16765873|ref|NP_461488.1| stationary phase inducible protein CsiE [Salmonell	3
1535		gi|16765879|ref|NP_461494.1| lysine decarboxylase 1 [Salmonella enterica subsp.	3
1536		gi|16765881|ref|NP_461496.1| nitrogen regulatory protein P-II 1 [Salmonella ent	3
1537		gi|16765883|ref|NP_461498.1| hypothetical protein STM2563 [Salmonella enterica	3
1538		gi|16765885|ref|NP_461500.1| phosphoribosylformylglycinamidine synthase [Salmon	3
1539		gi|16765924|ref|NP_461539.1| phage head-like protein [Salmonella enterica subsp	3
1540		gi|16765928|ref|NP_461543.1| head-to-tail joining-like protein [Salmonella ente	3
1541		gi|16765936|ref|NP_461551.1| antirepressor-like protein [Salmonella enterica su	3
1542		gi|39546346|ref|NP_461568.2| enterohemolysin 1-like protein [Phage Gifsy-1]	3
1543		gi|16765959|ref|NP_461574.1| anti-RNA polymerase sigma factor SigE [Salmonella	3
1544		gi|16765966|ref|NP_461581.1| autonomous glycyl radical cofactor GrcA [Salmonell	3
1545		gi|16765973|ref|NP_461588.1| hypothetical protein STM2653 [Salmonella enterica	3
1546		gi|16765980|ref|NP_461595.1| translation inhibitor protein RaiA [Salmonella ent	3
1547		gi|16765989|ref|NP_461604.1| tRNA (guanine-N(1)-)-methyltransferase [Salmonella	3
1548		gi|16766019|ref|NP_461634.1| phage tail-like protein [Salmonella enterica subsp	3
1549		gi|16766053|ref|NP_461668.1| periplasmic protein [Salmonella enterica subsp. en	3
1550		gi|16766056|ref|NP_461671.1| cytoplasmic protein [Salmonella enterica subsp. en	3
1551		gi|16766059|ref|NP_461674.1| cytoplasmic protein [Salmonella enterica subsp. en	3
1552		gi|16766072|ref|NP_461687.1| integrase [Salmonella enterica subsp. enterica ser	3
1553		gi|16766079|ref|NP_461694.1| DNA/RNA helicase [Salmonella enterica subsp. enter	3
1554		gi|16766095|ref|NP_461710.1| regulatory protein [Salmonella enterica subsp. ent	3
1555		gi|16766097|ref|NP_461712.1| tricarboxylic transport [Salmonella enterica subsp	3
1556		gi|16766102|ref|NP_461717.1| succinate-semialdehyde dehydrogenase I [Salmonella	3
1557		gi|16766118|ref|NP_461733.1| ribonucleotide-diphosphate reductase subunit alpha	3
1558		gi|16766133|ref|NP_461748.1| alanyl-tRNA synthetase [Salmonella enterica subsp.	3
1559		gi|16766147|ref|NP_461762.1| nitric oxide reductase [Salmonella enterica subsp.	3
1560		gi|16766161|ref|NP_461776.1| hydrogenase nickel incorporation protein HypB [Sal	3
1561		gi|16766169|ref|NP_461784.1| permease [Salmonella enterica subsp. enterica sero	3
1562	SptP	gi|16766184|ref|NP_461799.1| protein tyrosine phosphatase/GTPase activating pro	3
1563		gi|16766187|ref|NP_461802.1| acyl carrier protein [Salmonella enterica subsp. e	3
1564		gi|16766209|ref|NP_461824.1| cytoplasmic protein [Salmonella enterica subsp. en	3
1565		gi|16766218|ref|NP_461833.1| transcriptional regulator [Salmonella enterica sub	3
1566		gi|16766227|ref|NP_461842.1| flavoprotein [Salmonella enterica subsp. enterica	3
1567		gi|16766230|ref|NP_461845.1| RNA polymerase sigma factor RpoS [Salmonella enter	3
1568		gi|16766238|ref|NP_461853.1| hypothetical protein STM2932 [Salmonella enterica	3
1569		gi|16766246|ref|NP_461861.1| cytoplasmic protein [Salmonella enterica subsp. en	3
1570		gi|16766267|ref|NP_461882.1| D-glucarate dehydratase [Salmonella enterica subsp	3
1571		gi|16766282|ref|NP_461897.1| L-fucose-binding protein [Salmonella enterica subs	3
1572		gi|16766292|ref|NP_461907.1| murein transglycosylase A [Salmonella enterica sub	3
1573		gi|16766300|ref|NP_461915.1| hypothetical protein STM2998 [Salmonella enterica	3
1574		gi|16766301|ref|NP_461916.1| hypothetical protein STM2999 [Salmonella enterica	3
1575		gi|16766314|ref|NP_461929.1| transcriptional regulator [Salmonella enterica sub	3
1576		gi|16766323|ref|NP_461938.1| inner membrane protein [Salmonella enterica subsp.	3
1577		gi|16766332|ref|NP_461947.1| hypothetical protein STM3030 [Salmonella enterica	3
1578		gi|16766344|ref|NP_461959.1| thiol:disulfide interchange protein DsbC [Salmonel	3
1579		gi|16766349|ref|NP_461964.1| global regulator [Salmonella enterica subsp. enter	3
1580		gi|16766350|ref|NP_461965.1| hemolysin [Salmonella enterica subsp. enterica ser	3
1581		gi|16766363|ref|NP_461978.1| D-3-phosphoglycerate dehydrogenase [Salmonella ent	3
1582		gi|16766374|ref|NP_461989.1| ABC-type cobalt transport system permease componen	3
1583		gi|16766400|ref|NP_462015.1| twitching motility protein [Salmonella enterica su	3
1584		gi|16766405|ref|NP_462020.1| coproporphyrinogen III oxidase [Salmonella enteric	3
1585		gi|16766409|ref|NP_462024.1| hypothetical protein STM3108 [Salmonella enterica	3
1586		gi|16766411|ref|NP_462026.1| adenine DNA glycosylase [Salmonella enterica subsp	3
1587		gi|16766416|ref|NP_462031.1| inner membrane protein [Salmonella enterica subsp.	3
1588		gi|16766422|ref|NP_462037.1| arylsulfatase [Salmonella enterica subsp. enterica	3
1589		gi|16766470|ref|NP_462085.1| inner membrane protein [Salmonella enterica subsp.	3
1590		gi|16766471|ref|NP_462086.1| transporter [Salmonella enterica subsp. enterica s	3
1591		gi|16766482|ref|NP_462097.1| esterase YqiA [Salmonella enterica subsp. enterica	3
1592		gi|16766523|ref|NP_462138.1| tellurite resistance protein [Salmonella enterica	3
1593		gi|16766544|ref|NP_462159.1| DNA-binding transcriptional activator TdcA [Salmon	3
1594		gi|16766549|ref|NP_462164.1| sugar kinase [Salmonella enterica subsp. enterica	3
1595		gi|16766566|ref|NP_462181.1| nucleoside-diphosphate-sugar epimerase [Salmonella	3
1596		gi|16766577|ref|NP_462192.1| tryptophan permease [Salmonella enterica subsp. en	3
1597		gi|16766607|ref|NP_462222.1| transport protein [Salmonella enterica subsp. ente	3
1598		gi|16766616|ref|NP_462231.1| sigma(54) modulation protein [Salmonella enterica	3
1599		gi|16766622|ref|NP_462237.1| isoprenoid biosynthesis protein with amidotransfer	3
1600		gi|16766663|ref|NP_462278.1| protease TldD [Salmonella enterica subsp. enterica	3
1601		gi|16766666|ref|NP_462281.1| Maf-like protein [Salmonella enterica subsp. enter	3
1602		gi|16766669|ref|NP_462284.1| rod shape-determining protein MreB [Salmonella ent	3
1603		gi|16766670|ref|NP_462285.1| regulatory protein CsrD [Salmonella enterica subsp	3
1604		gi|16766685|ref|NP_462300.1| acriflavine resistance protein E precursor [Salmon	3
1605		gi|16766705|ref|NP_462320.1| 30S ribosomal protein S4 [Salmonella enterica subs	3
1606		gi|16766707|ref|NP_462322.1| 30S ribosomal protein S13 [Salmonella enterica sub	3
1607		gi|16766711|ref|NP_462326.1| 50S ribosomal protein L30 [Salmonella enterica sub	3
1608		gi|16766720|ref|NP_462335.1| 30S ribosomal protein S17 [Salmonella enterica sub	3
1609		gi|16766721|ref|NP_462336.1| 50S ribosomal protein L29 [Salmonella enterica sub	3
1610		gi|16766723|ref|NP_462338.1| 30S ribosomal protein S3 [Salmonella enterica subs	3
1611		gi|16766724|ref|NP_462339.1| 50S ribosomal protein L22 [Salmonella enterica sub	3
1612		gi|16766729|ref|NP_462344.1| 50S ribosomal protein L3 [Salmonella enterica subs	3
1613		gi|16766752|ref|NP_462367.1| phosphoribulokinase [Salmonella enterica subsp. en	3
1614		gi|16766754|ref|NP_462369.1| cAMP-regulatory protein [Salmonella enterica subsp	3
1615		gi|16766771|ref|NP_462386.1| ribulose-phosphate 3-epimerase [Salmonella enteric	3
1616		gi|308065953|ref|NP_462407.2| RNase R [Salmonella enterica subsp. enterica sero	3
1617		gi|16766828|ref|NP_462443.1| gluconate kinase 1 [Salmonella enterica subsp. ent	3
1618		gi|16766880|ref|NP_462495.1| oligopeptidase A [Salmonella enterica subsp. enter	3
1619		gi|16766916|ref|NP_462531.1| dipeptide transporter permease DppB [Salmonella en	3
1620		gi|16766943|ref|NP_462558.1| inner membrane protein [Salmonella enterica subsp.	3
1621		gi|16766948|ref|NP_462563.1| hypothetical protein STM3663 [Salmonella enterica	3
1622		gi|16766991|ref|NP_462606.1| periplasmic protein [Salmonella enterica subsp. en	3
1623		gi|16767034|ref|NP_462649.1| alpha-xylosidase YicI [Salmonella enterica subsp.	3
1624		gi|16767049|ref|NP_462664.1| permease [Salmonella enterica subsp. enterica sero	3
1625		gi|16767055|ref|NP_462670.1| phosphotransferase system enzyme IIB [Salmonella e	3
1626		gi|161353566|ref|NP_462708.3| heat shock chaperone IbpB [Salmonella enterica su	3
1627		gi|16767095|ref|NP_462710.1| hypothetical protein STM3810 [Salmonella enterica	3
1628		gi|39546377|ref|NP_462745.2| reverse transcriptase [Salmonella enterica subsp.	3
1629		gi|16767132|ref|NP_462747.1| DNA-binding transcriptional regulator YidZ [Salmon	3
1630		gi|16767169|ref|NP_462784.1| ribokinase [Salmonella enterica subsp. enterica se	3
1631		gi|16767183|ref|NP_462798.1| cytoplasmic protein [Salmonella enterica subsp. en	3
1632		gi|16767193|ref|NP_462808.1| undecaprenyl-phosphate N-acetylglucosaminyltransfe	3
1633		gi|16767208|ref|NP_462823.1| uroporphyrinogen-III synthase [Salmonella enterica	3
1634		gi|16767211|ref|NP_462826.1| inner membrane protein [Salmonella enterica subsp.	3
1635		gi|16767214|ref|NP_462829.1| frataxin-like protein [Salmonella enterica subsp.	3
1636		gi|16767220|ref|NP_462835.1| flavin mononucleotide phosphatase [Salmonella ente	3
1637		gi|16767227|ref|NP_462842.1| phospholipase A [Salmonella enterica subsp. enteri	3
1638		gi|16767239|ref|NP_462854.1| DNA recombination protein RmuC [Salmonella enteric	3
1639		gi|16767261|ref|NP_462876.1| serine/threonine protein kinase [Salmonella enteri	3
1640		gi|16767271|ref|NP_462886.1| nitrogen regulation protein NR(II) [Salmonella ent	3
1641		gi|39546382|ref|NP_462893.2| membrane-associated metal-dependent hydrolase [Sal	3
1642		gi|39546383|ref|NP_462894.2| periplasmic protein [Salmonella enterica subsp. en	3
1643		gi|16767286|ref|NP_462901.1| isomerase [Salmonella enterica subsp. enterica ser	3
1644		gi|16767288|ref|NP_462903.1| oxidoreductase [Salmonella enterica subsp. enteric	3
1645		gi|16767297|ref|NP_462912.1| acetyl esterase [Salmonella enterica subsp. enteri	3
1646		gi|16767327|ref|NP_462942.1| ferrous iron efflux protein F [Salmonella enterica	3
1647		gi|16767332|ref|NP_462947.1| aminoimidazole riboside kinase [Salmonella enteric	3
1648		gi|16767361|ref|NP_462976.1| primosome assembly protein PriA [Salmonella enteri	3
1649		gi|16767374|ref|NP_462989.1| glycerol dehydrogenase [Salmonella enterica subsp.	3
1650		gi|16767376|ref|NP_462991.1| PEP-protein phosphotransferase [Salmonella enteric	3
1651		gi|16767420|ref|NP_463035.1| NADH pyrophosphatase [Salmonella enterica subsp. e	3
1652		gi|16767421|ref|NP_463036.1| uroporphyrinogen decarboxylase [Salmonella enteric	3
1653		gi|16767463|ref|NP_463078.1| phage tail sheath protein [Salmonella enterica sub	3
1654		gi|16767470|ref|NP_463085.1| aspartate kinase III [Salmonella enterica subsp. e	3
1655		gi|16767523|ref|NP_463138.1| acetate permease [Salmonella enterica subsp. enter	3
1656		gi|16767534|ref|NP_463149.1| TPR repeat-containing protein [Salmonella enterica	3
1657		gi|16767552|ref|NP_463167.1| cytoplasmic protein [Salmonella enterica subsp. en	3
1658		gi|16767563|ref|NP_463178.1| cytoplasmic protein [Salmonella enterica subsp. en	3
1659		gi|16767573|ref|NP_463188.1| divalent-cation tolerance protein CutA [Salmonella	3
1660		gi|16767619|ref|NP_463234.1| cytoplasmic protein [Salmonella enterica subsp. en	3
1661		gi|16767625|ref|NP_463240.1| biofilm stress and motility protein A [Salmonella	3
1662		gi|16767630|ref|NP_463245.1| PTS system L-ascorbate-specific transporter subuni	3
1663		gi|16767663|ref|NP_463278.1| transcriptional regulator [Salmonella enterica sub	3
1664		gi|16767666|ref|NP_463281.1| inner membrane protein [Salmonella enterica subsp.	3
1665		gi|39546400|ref|NP_463285.2| endonuclease [Salmonella enterica subsp. enterica	3
1666		gi|16767686|ref|NP_463301.1| cytoplasmic protein [Salmonella enterica subsp. en	3
1667		gi|16767752|ref|NP_463367.1| tryptophanyl-tRNA synthetase II [Salmonella enteri	3
1668		gi|16767759|ref|NP_463374.1| sugar transporter [Salmonella enterica subsp. ente	3
1669		gi|16767779|ref|NP_463394.1| PTS permease [Salmonella enterica subsp. enterica	3
1670		gi|16767788|ref|NP_463403.1| primosomal protein DnaI [Salmonella enterica subsp	3
1671		gi|161353569|ref|NP_463407.2| DNA-binding transcriptional activator BglJ [Salmo	3
1672		gi|16767829|ref|NP_463444.1| DNA-binding response regulator CreB [Salmonella en	3
1673		gi|17233405|ref|NP_490494.1| putative phospholipase D [Salmonella typhimurium L	3
1674		gi|17233478|ref|NP_490505.1| regulator [Salmonella typhimurium LT2]	3
1675		gi|17233496|ref|NP_490535.1| putative resolvase [Salmonella typhimurium LT2]	3
1676		gi|17233423|ref|NP_490538.1| alpha-helical coiled-coil protein [Salmonella typh	3
1677		gi|32441711|ref|NP_861531.1| hypothetical protein PSLT050.1N [Salmonella typhim	3
1678		gi|17233428|ref|NP_490547.1| putative cytoplasmic protein [Salmonella typhimuri	3
1679		gi|17233470|ref|NP_490592.1| conjugal transfer nickase/helicase TraI [Salmonell	3
1680		gi|16763421|ref|NP_459036.1| transcriptional regulator [Salmonella enterica sub	4
1681		gi|16763520|ref|NP_459135.1| D-alanine--D-alanine ligase [Salmonella enterica s	4
1682		gi|161353610|ref|NP_459190.2| glutamyl-Q tRNA(Asp) synthetase [Salmonella enter	4
1683		gi|16763644|ref|NP_459259.1| hydroxyacylglutathione hydrolase [Salmonella enter	4
1684		gi|16763700|ref|NP_459315.1| fermentation/respiration switch protein [Salmonell	4
1685		gi|16763707|ref|NP_459322.1| cytoplasmic protein [Salmonella enterica subsp. en	4
1686		gi|16763735|ref|NP_459350.1| copper chaperone [Salmonella enterica subsp. enter	4
1687		gi|16763762|ref|NP_459377.1| permease [Salmonella enterica subsp. enterica sero	4
1688		gi|16763802|ref|NP_459417.1| 1-deoxy-D-xylulose-5-phosphate synthase [Salmonell	4
1689		gi|16763806|ref|NP_459421.1| 2-aminoethylphosphonate transporter [Salmonella en	4
1690		gi|16763876|ref|NP_459491.1| cytoplasmic protein [Salmonella enterica subsp. en	4
1691		gi|16763881|ref|NP_459496.1| inner membrane protein [Salmonella enterica subsp.	4
1692		gi|16763960|ref|NP_459575.1| carboxylate-amine ligase [Salmonella enterica subs	4
1693		gi|16764028|ref|NP_459643.1| 2-keto-3-deoxygluconate permease [Salmonella enter	4
1694		gi|16764064|ref|NP_459679.1| flavodoxin FldA [Salmonella enterica subsp. enteri	4
1695		gi|16764123|ref|NP_459738.1| zinc transporter ZitB [Salmonella enterica subsp.	4
1696		gi|16764125|ref|NP_459740.1| phospho-2-dehydro-3-deoxyheptonate aldolase [Salmo	4
1697		gi|16764135|ref|NP_459750.1| ABC-type cobalamin/Fe3+-siderophore transport comp	4
1698		gi|16764169|ref|NP_459784.1| molybdopterin guanine dinucleotide biosynthesis pr	4
1699		gi|16764201|ref|NP_459816.1| inner membrane protein [Salmonella enterica subsp.	4
1700		gi|16764214|ref|NP_459829.1| ribosomal protein S12 methylthiotransferase [Salmo	4
1701		gi|16764311|ref|NP_459926.1| SlsA [Salmonella enterica subsp. enterica serovar	4
1702		gi|16764365|ref|NP_459980.1| integrase [Salmonella enterica subsp. enterica ser	4
1703		gi|16764396|ref|NP_460011.1| minor tail protein [Phage Gifsy-2]	4
1704		gi|16764552|ref|NP_460167.1| 3-oxoacyl-(acyl carrier protein) synthase II [Salm	4
1705		gi|16764571|ref|NP_460186.1| transcription-repair coupling factor [Salmonella e	4
1706		gi|16764617|ref|NP_460232.1| transcriptional regulator [Salmonella enterica sub	4
1707		gi|16764650|ref|NP_460265.1| glutamate dehydrogenase [Salmonella enterica subsp	4
1708	SseJ	gi|16764975|ref|NP_460590.1| secreted effector protein [Salmonella enterica sub	4
1709		gi|16765039|ref|NP_460654.1| peptide transport protein [Salmonella enterica sub	4
1710		gi|16765075|ref|NP_460690.1| catalase [Salmonella enterica subsp. enterica sero	4
1711		gi|16765078|ref|NP_460693.1| hypothetical protein STM1734 [Salmonella enterica	4
1712		gi|16765164|ref|NP_460779.1| hypothetical protein STM1823 [Salmonella enterica	4
1713		gi|16765309|ref|NP_460924.1| flagellar assembly protein H [Salmonella enterica	4
1714		gi|16765370|ref|NP_460985.1| propanediol dehydratase large subunit [Salmonella	4
1715		gi|16765384|ref|NP_460999.1| polyhedral body protein [Salmonella enterica subsp	4
1716		gi|16765395|ref|NP_461010.1| thiosulfate reductase precursor [Salmonella enteri	4
1717		gi|16765440|ref|NP_461055.1| colanic acid biosynthesis acetyltransferase WcaF [	4
1718		gi|16765442|ref|NP_461057.1| colanic acid biosynthesis protein [Salmonella ente	4
1719		gi|16765562|ref|NP_461177.1| phage tail fiber assembly protein [Salmonella ente	4
1720		gi|16765773|ref|NP_461388.1| cytoplasmic protein [Salmonella enterica subsp. en	4
1721		gi|16765780|ref|NP_461395.1| transport protein [Salmonella enterica subsp. ente	4
1722		gi|16765831|ref|NP_461446.1| inosine 5'-monophosphate dehydrogenase [Salmonella	4
1723		gi|16765863|ref|NP_461478.1| cysteine desulfurase [Salmonella enterica subsp. e	4
1724		gi|16765917|ref|NP_461532.1| minor tail-like protein [Salmonella enterica subsp	4
1725		gi|16765930|ref|NP_461545.1| DNA packaging-like protein [Salmonella enterica su	4
1726		gi|16766033|ref|NP_461648.1| major capsid-like protein [Salmonella enterica sub	4
1727		gi|16766063|ref|NP_461678.1| glucitol-specific PTS enzyme III [Salmonella enter	4
1728		gi|16766070|ref|NP_461685.1| phosphotransferase system IIC component [Salmonell	4
1729		gi|16766195|ref|NP_461810.1| needle complex export protein [Salmonella enterica	4
1730		gi|16766264|ref|NP_461879.1| hybrid sensory histidine kinase BarA [Salmonella e	4
1731		gi|16766265|ref|NP_461880.1| glycerate kinase 2 [Salmonella enterica subsp. ent	4
1732		gi|16766322|ref|NP_461937.1| transcriptional regulator [Salmonella enterica sub	4
1733		gi|39546354|ref|NP_945169.1| hypothetical protein STM3025.1N [Salmonella enteri	4
1734		gi|16766365|ref|NP_461980.1| chromosome replication initiation inhibitor protei	4
1735		gi|16766369|ref|NP_461984.1| fructose-bisphosphate aldolase [Salmonella enteric	4
1736		gi|16766423|ref|NP_462038.1| arylsulfatase regulator [Salmonella enterica subsp	4
1737		gi|16766424|ref|NP_462039.1| response regulator [Salmonella enterica subsp. ent	4
1738		gi|16766429|ref|NP_462044.1| NAD-dependent aldehyde dehydrogenase [Salmonella e	4
1739		gi|16766461|ref|NP_462076.1| cystathionine beta-lyase [Salmonella enterica subs	4
1740		gi|16766540|ref|NP_462155.1| pyruvate formate-lyase 4/2-ketobutyrate formate-ly	4
1741		gi|16766553|ref|NP_462168.1| phosphotransferase system fructose-specific compon	4
1742		gi|16766555|ref|NP_462170.1| tagatose 6-phosphate kinase 1 [Salmonella enterica	4
1743		gi|16766600|ref|NP_462215.1| octaprenyl diphosphate synthase [Salmonella enteri	4
1744		gi|16766686|ref|NP_462301.1| multidrug transport protein [Salmonella enterica s	4
1745		gi|16766692|ref|NP_462307.1| DNA topoisomerase [Salmonella enterica subsp. ente	4
1746		gi|16766697|ref|NP_462312.1| 16S rRNA methyltransferase B [Salmonella enterica	4
1747		gi|16766727|ref|NP_462342.1| 50S ribosomal protein L23 [Salmonella enterica sub	4
1748		gi|16766908|ref|NP_462523.1| cytoplasmic protein [Salmonella enterica subsp. en	4
1749		gi|16766914|ref|NP_462529.1| dipeptide transporter ATP-binding subunit [Salmone	4
1750		gi|16766982|ref|NP_462597.1| mandelate racemase [Salmonella enterica subsp. ent	4
1751		gi|16767012|ref|NP_462627.1| 50S ribosomal protein L33 [Salmonella enterica sub	4
1752		gi|16767021|ref|NP_462636.1| transcriptional regulator [Salmonella enterica sub	4
1753		gi|16767032|ref|NP_462647.1| purine/xanthine transport protein [Salmonella ente	4
1754		gi|16767050|ref|NP_462665.1| cytoplasmic protein [Salmonella enterica subsp. en	4
1755		gi|228960701|ref|NP_462709.3| heat shock protein IbpA [Salmonella enterica subs	4
1756		gi|16767119|ref|NP_462734.1| transcriptional regulator [Salmonella enterica sub	4
1757		gi|16767163|ref|NP_462778.1| regulatory ATPase RavA [Salmonella enterica subsp.	4
1758		gi|39546390|ref|NP_462960.2| autoinducer-2 (AI-2) modifying protein LsrG [Salmo	4
1759		gi|16767382|ref|NP_462997.1| regulatory protein [Salmonella enterica subsp. ent	4
1760		gi|16767501|ref|NP_463116.1| cytoplasmic protein [Salmonella enterica subsp. en	4
1761		gi|16767509|ref|NP_463124.1| ABC exporter outer membrane component [Salmonella	4
1762		gi|16767510|ref|NP_463125.1| cation efflux pump [Salmonella enterica subsp. ent	4
1763		gi|16767532|ref|NP_463147.1| formate-dependent nitrite reductase complex subuni	4
1764		gi|16767553|ref|NP_463168.1| DNA-binding transcriptional activator DcuR [Salmon	4
1765		gi|16767579|ref|NP_463194.1| chaperonin GroEL [Salmonella enterica subsp. enter	4
1766		gi|16767741|ref|NP_463356.1| cytoplasmic protein [Salmonella enterica subsp. en	4
1767		gi|16767790|ref|NP_463405.1| hypothetical protein STM4546 [Salmonella enterica	4
1768		gi|17233414|ref|NP_490518.1| plasmid maintenance protein CcdB [Salmonella typhi	4
1769		gi|17233446|ref|NP_490566.1| conjugal transfer protein TraK [Salmonella typhimu	4
1770		gi|17233459|ref|NP_490579.1| conjugal transfer mating pair stabilization protei	4
1771		gi|16763401|ref|NP_459016.1| hypothetical protein STM0011 [Salmonella enterica	5
1772		gi|16763403|ref|NP_459018.1| chaperone protein DnaJ [Salmonella enterica subsp.	5
1773		gi|16763449|ref|NP_459064.1| citrate lyase subunit gamma [Salmonella enterica s	5
1774		gi|16763461|ref|NP_459076.1| crotonobetaine/carnitine-CoA ligase [Salmonella en	5
1775		gi|16763462|ref|NP_459077.1| crotonobetainyl-CoA:carnitine CoA-transferase [Sal	5
1776		gi|16763526|ref|NP_459141.1| preprotein translocase subunit SecA [Salmonella en	5
1777		gi|16763541|ref|NP_459156.1| transcriptional regulator PdhR [Salmonella enteric	5
1778		gi|16763551|ref|NP_459166.1| 2-keto-3-deoxygluconate permease [Salmonella enter	5
1779		gi|16763555|ref|NP_459170.1| S-adenosylmethionine decarboxylase [Salmonella ent	5
1780		gi|16763567|ref|NP_459182.1| fimbrial subunit [Salmonella enterica subsp. enter	5
1781		gi|16763586|ref|NP_459201.1| fimbrial outer membrane usher [Salmonella enterica	5
1782		gi|16763597|ref|NP_459212.1| 5'-methylthioadenosine/S-adenosylhomocysteine nucl	5
1783		gi|16763601|ref|NP_459216.1| hypothetical protein STM0211 [Salmonella enterica	5
1784		gi|16763615|ref|NP_459230.1| periplasmic chaperone [Salmonella enterica subsp.	5
1785		gi|16763623|ref|NP_459238.1| endochitinase [Salmonella enterica subsp. enterica	5
1786		gi|16763629|ref|NP_459244.1| cytoplasmic protein [Salmonella enterica subsp. en	5
1787		gi|16763648|ref|NP_459263.1| cytoplasmic protein [Salmonella enterica subsp. en	5
1788		gi|16763651|ref|NP_459266.1| cytoplasmic protein [Salmonella enterica subsp. en	5
1789		gi|16763669|ref|NP_459284.1| cytoplasmic protein [Salmonella enterica subsp. en	5
1790		gi|16763675|ref|NP_459290.1| RHS-like protein [Salmonella enterica subsp. enter	5
1791		gi|16763701|ref|NP_459316.1| DNA-binding transcriptional regulator Crl [Salmone	5
1792		gi|16763710|ref|NP_459325.1| 3-isopropylmalate isomerase [Salmonella enterica s	5
1793		gi|16763715|ref|NP_459330.1| outer membrane protein [Salmonella enterica subsp.	5
1794		gi|16763721|ref|NP_459336.1| inner membrane protein [Salmonella enterica subsp.	5
1795		gi|16763745|ref|NP_459360.1| transport protein [Salmonella enterica subsp. ente	5
1796		gi|16763747|ref|NP_459362.1| prp operon regulator [Salmonella enterica subsp. e	5
1797		gi|16763751|ref|NP_459366.1| propionyl-CoA synthetase [Salmonella enterica subs	5
1798		gi|16763756|ref|NP_459371.1| transport protein [Salmonella enterica subsp. ente	5
1799		gi|16763773|ref|NP_459388.1| fructokinase [Salmonella enterica subsp. enterica	5
1800		gi|16763790|ref|NP_459405.1| regulatory protein [Salmonella enterica subsp. ent	5
1801		gi|16763799|ref|NP_459414.1| thiamine monophosphate kinase [Salmonella enterica	5
1802		gi|16763803|ref|NP_459418.1| geranyltranstransferase [Salmonella enterica subsp	5
1803		gi|16763810|ref|NP_459425.1| 2-aminoethylphosphonate transport protein [Salmone	5
1804		gi|39546297|ref|NP_945155.1| hypothetical protein STM0461.1n [Salmonella enteri	5
1805		gi|16763844|ref|NP_459459.1| ammonium transporter [Salmonella enterica subsp. e	5
1806		gi|16763859|ref|NP_459474.1| transposase [Salmonella enterica subsp. enterica s	5
1807		gi|16763873|ref|NP_459488.1| transport protein [Salmonella enterica subsp. ente	5
1808		gi|16763875|ref|NP_459490.1| hypothetical protein STM0495 [Salmonella enterica	5
1809		gi|16763885|ref|NP_459500.1| short chain dehydrogenase [Salmonella enterica sub	5
1810		gi|16763888|ref|NP_459503.1| inner membrane protein [Salmonella enterica subsp.	5
1811		gi|16763907|ref|NP_459522.1| allantoate amidohydrolase [Salmonella enterica sub	5
1812		gi|16763910|ref|NP_459525.1| cytoplasmic protein [Salmonella enterica subsp. en	5
1813		gi|16763912|ref|NP_459527.1| carbamate kinase [Salmonella enterica subsp. enter	5
1814		gi|16763914|ref|NP_459529.1| phosphoribosylaminoimidazole carboxylase catalytic	5
1815		gi|16763924|ref|NP_459539.1| fimbrial protein [Salmonella enterica subsp. enter	5
1816		gi|16763985|ref|NP_459600.1| alkyl hydroperoxide reductase subunit C [Salmonell	5
1817		gi|16763993|ref|NP_459608.1| nucleoside diphosphate kinase regulator [Salmonell	5
1818		gi|16764000|ref|NP_459615.1| citrate lyase subunit gamma [Salmonella enterica s	5
1819		gi|16764036|ref|NP_459651.1| heatshock protein [Salmonella enterica subsp. ente	5
1820		gi|16764060|ref|NP_459675.1| citrate utilization protein b [Salmonella enterica	5
1821		gi|16764063|ref|NP_459678.1| ferric uptake regulator [Salmonella enterica subsp	5
1822		gi|16764066|ref|NP_459681.1| hypothetical protein STM0696 [Salmonella enterica	5
1823		gi|16764076|ref|NP_459691.1| potassium-transporting ATPase subunit A [Salmonell	5
1824		gi|16764103|ref|NP_459718.1| succinate dehydrogenase cytochrome b556 small memb	5
1825		gi|16764105|ref|NP_459720.1| succinate dehydrogenase iron-sulfur subunit [Salmo	5
1826		gi|16764127|ref|NP_459742.1| fumarate hydratase [Salmonella enterica subsp. ent	5
1827		gi|16764157|ref|NP_459772.1| biotin synthetase [Salmonella enterica subsp. ente	5
1828		gi|16764159|ref|NP_459774.1| biotin biosynthesis protein BioC [Salmonella enter	5
1829		gi|16764183|ref|NP_459798.1| ATP-dependent RNA helicase RhlE [Salmonella enteri	5
1830		gi|308065968|ref|NP_459823.2| molybdopterin biosynthesis protein MoeA [Salmonel	5
1831		gi|16764235|ref|NP_459850.1| hypothetical protein STM0873 [Salmonella enterica	5
1832		gi|16764242|ref|NP_459857.1| putrescine transporter subunit: membrane component	5
1833		gi|16764245|ref|NP_459860.1| PTS system ascorbate-specific transporter subunit	5
1834		gi|16764246|ref|NP_459861.1| inner membrane protein [Salmonella enterica subsp.	5
1835		gi|16764264|ref|NP_459879.1| hypothetical protein STM0902 [Salmonella phage Fel	5
1836		gi|16764269|ref|NP_459884.1| chitinase [Salmonella phage Fels-1]	5
1837		gi|16764282|ref|NP_459897.1| Ail/OmpX-like protein [Salmonella phage Fels-1]	5
1838		gi|39546306|ref|NP_459902.2| host-specificity protein [Salmonella phage Fels-1]	5
1839		gi|16764295|ref|NP_459910.1| nucleoside-diphosphate-sugar epimerase [Salmonella	5
1840		gi|16764302|ref|NP_459917.1| VirK-like protein [Salmonella enterica subsp. ente	5
1841		gi|16764303|ref|NP_459918.1| macrolide transporter subunit MacA [Salmonella ent	5
1842		gi|16764309|ref|NP_459924.1| integrase [Salmonella enterica subsp. enterica ser	5
1843		gi|16764316|ref|NP_459931.1| leucyl/phenylalanyl-tRNA--protein transferase [Sal	5
1844		gi|16764329|ref|NP_459944.1| amino-acid transporter [Salmonella enterica subsp.	5
1845		gi|16764334|ref|NP_459949.1| formate transporter [Salmonella enterica subsp. en	5
1846		gi|16764342|ref|NP_459957.1| integration host factor subunit beta [Salmonella e	5
1847		gi|16764356|ref|NP_459971.1| outer membrane protein [Salmonella enterica subsp.	5
1848		gi|16764360|ref|NP_459975.1| asparaginyl-tRNA synthetase [Salmonella enterica s	5
1849		gi|16764361|ref|NP_459976.1| leucine response regulator [Salmonella enterica su	5
1850		gi|16764362|ref|NP_459977.1| diaminopropionate ammonia-lyase [Salmonella enteri	5
1851		gi|16764367|ref|NP_459982.1| hypothetical protein STM1007 [Salmonella enterica	5
1852		gi|16764393|ref|NP_460008.1| Clp protease-like protein [Phage Gifsy-2]	5
1853		gi|16764394|ref|NP_460009.1| RecA/RadA recombinase [Phage Gifsy-2]	5
1854		gi|16764400|ref|NP_460015.1| minor tail protein [Phage Gifsy-2]	5
1855		gi|16764413|ref|NP_460028.1| hypothetical protein STM1054 [Salmonella enterica	5
1856		gi|16764422|ref|NP_460037.1| paraquat-inducible protein A [Salmonella enterica	5
1857		gi|16764452|ref|NP_460067.1| pathogenicity island-encoded protein D [Salmonella	5
1858		gi|16764467|ref|NP_460082.1| periplasmic protein [Salmonella enterica subsp. en	5
1859		gi|16764485|ref|NP_460100.1| sodium/glucose cotransporter [Salmonella enterica	5
1860		gi|16764495|ref|NP_460110.1| curli operon transcriptional regulator [Salmonella	5
1861		gi|16764505|ref|NP_460120.1| glucans biosynthesis protein [Salmonella enterica	5
1862		gi|16764506|ref|NP_460121.1| glucan biosynthesis protein G [Salmonella enterica	5
1863		gi|16764524|ref|NP_460139.1| hypothetical protein STM1168 [Salmonella enterica	5
1864		gi|16764529|ref|NP_460144.1| flagellar basal body P-ring biosynthesis protein F	5
1865		gi|16764581|ref|NP_460196.1| putrescine/spermidine ABC transporter ATPase prote	5
1866		gi|16764597|ref|NP_460212.1| envelope protein [Salmonella enterica subsp. enter	5
1867		gi|16764612|ref|NP_460227.1| inner membrane protein [Salmonella enterica subsp.	5
1868		gi|16764624|ref|NP_460239.1| nitric oxide reductase [Salmonella enterica subsp.	5
1869		gi|16764636|ref|NP_460251.1| serine protein kinase [Salmonella enterica subsp.	5
1870		gi|16764655|ref|NP_460270.1| arginine succinyltransferase [Salmonella enterica	5
1871		gi|16764697|ref|NP_460312.1| hypothetical protein STM1346 [Salmonella enterica	5
1872		gi|16764710|ref|NP_460325.1| quinate/shikimate dehydrogenase [Salmonella enteri	5
1873		gi|16764711|ref|NP_460326.1| transport protein [Salmonella enterica subsp. ente	5
1874		gi|16764727|ref|NP_460342.1| murein lipoprotein [Salmonella enterica subsp. ent	5
1875		gi|16764730|ref|NP_460345.1| proline iminopeptidase [Salmonella enterica subsp.	5
1876		gi|16764775|ref|NP_460390.1| cyclopropane fatty acyl phospholipid synthase [Sal	5
1877		gi|16764777|ref|NP_460392.1| DNA-binding transcriptional regulator [Salmonella	5
1878		gi|16764784|ref|NP_460399.1| N-ethylmaleimide reductase [Salmonella enterica su	5
1879		gi|16764801|ref|NP_460416.1| endonuclease III [Salmonella enterica subsp. enter	5
1880		gi|16764811|ref|NP_460426.1| adenosine deaminase [Salmonella enterica subsp. en	5
1881		gi|16764851|ref|NP_460466.1| dehydrogenase [Salmonella enterica subsp. enterica	5
1882		gi|16764853|ref|NP_460468.1| mannitol dehydrogenase [Salmonella enterica subsp.	5
1883		gi|16764857|ref|NP_460472.1| dipeptidyl carboxypeptidase II [Salmonella enteric	5
1884		gi|16764886|ref|NP_460501.1| regulatory protein [Salmonella enterica subsp. ent	5
1885		gi|39546321|ref|NP_945161.1| hypothetical protein STM1551.1n [Salmonella enteri	5
1886		gi|16764904|ref|NP_460519.1| alpha amylase [Salmonella enterica subsp. enterica	5
1887		gi|16764910|ref|NP_460525.1| malate dehydrogenase [Salmonella enterica subsp. e	5
1888		gi|16764925|ref|NP_460540.1| hypothetical protein STM1581 [Salmonella enterica	5
1889		gi|16764934|ref|NP_460549.1| acyltransferase [Salmonella enterica subsp. enteri	5
1890		gi|16764953|ref|NP_460568.1| potassium-tellurite ethidium and proflavin transpo	5
1891		gi|16764982|ref|NP_460597.1| SAM-dependent methyltransferase [Salmonella enteri	5
1892		gi|16764992|ref|NP_460607.1| heat-inducible protein [Salmonella enterica subsp.	5
1893		gi|16764997|ref|NP_460612.1| membrane transporter of cations [Salmonella enteri	5
1894		gi|39546323|ref|NP_460619.2| fumarate/nitrate reduction transcriptional regulat	5
1895		gi|308065966|ref|NP_460631.2| outer membrane lipoprotein [Salmonella enterica s	5
1896		gi|16765023|ref|NP_460638.1| murein peptide amidase A [Salmonella enterica subs	5
1897		gi|16765031|ref|NP_460646.1| DNA-binding transcriptional activator PspC [Salmon	5
1898		gi|16765038|ref|NP_460653.1| peptide transport protein [Salmonella enterica sub	5
1899		gi|16765058|ref|NP_460673.1| DNA topoisomerase I [Salmonella enterica subsp. en	5
1900		gi|16765060|ref|NP_460675.1| periplasmic protease [Salmonella enterica subsp. e	5
1901		gi|16765094|ref|NP_460709.1| thymidine kinase [Salmonella enterica subsp. enter	5
1902		gi|16765102|ref|NP_460717.1| nitrate reductase 1 gamma subunit [Salmonella ente	5
1903		gi|16765110|ref|NP_460725.1| sulfur reduction protein [Salmonella enterica subs	5
1904		gi|16765154|ref|NP_460769.1| cytoplasmic protein [Salmonella enterica subsp. en	5
1905		gi|39546327|ref|NP_460783.2| diguanylate cyclase/phosphodiesterase [Salmonella	5
1906		gi|16765186|ref|NP_460801.1| carboxy-terminal protease [Salmonella enterica sub	5
1907		gi|16765187|ref|NP_460802.1| solute/DNA competence effector [Salmonella enteric	5
1908		gi|16765188|ref|NP_460803.1| nucleotide-binding protein [Salmonella enterica su	5
1909		gi|16765205|ref|NP_460820.1| inner membrane protein [Salmonella enterica subsp.	5
1910		gi|16765210|ref|NP_460825.1| phage-tail assembly-like protein [Salmonella enter	5
1911		gi|16765240|ref|NP_460855.1| Holliday junction resolvase [Salmonella enterica s	5
1912		gi|16765260|ref|NP_460875.1| chemotaxis methyltransferase CheR [Salmonella ente	5
1913		gi|16765261|ref|NP_460876.1| methyl accepting chemotaxis protein II [Salmonella	5
1914		gi|16765276|ref|NP_460891.1| ferritin [Salmonella enterica subsp. enterica sero	5
1915		gi|16765277|ref|NP_460892.1| cytoplasmic protein [Salmonella enterica subsp. en	5
1916		gi|16765284|ref|NP_460899.1| excinuclease ABC subunit C [Salmonella enterica su	5
1917		gi|16765291|ref|NP_460906.1| D-cysteine desulfhydrase [Salmonella enterica subs	5
1918		gi|16765320|ref|NP_460935.1| colanic acid capsular biosynthesis activation prot	5
1919		gi|16765329|ref|NP_460944.1| hypothetical protein STM1993 [Salmonella enterica	5
1920		gi|16765336|ref|NP_460951.1| inner membrane protein [Salmonella enterica subsp.	5
1921		gi|16765341|ref|NP_460956.1| AMP nucleosidase [Salmonella enterica subsp. enter	5
1922		gi|16765362|ref|NP_460977.1| cobalt-precorrin-6A synthase [Salmonella enterica	5
1923		gi|16765387|ref|NP_461002.1| propionate kinase [Salmonella enterica subsp. ente	5
1924		gi|16765390|ref|NP_461005.1| inner membrane protein [Salmonella enterica subsp.	5
1925		gi|16765397|ref|NP_461012.1| exonuclease I [Salmonella enterica subsp. enterica	5
1926		gi|16765399|ref|NP_461014.1| transcriptional regulator [Salmonella enterica sub	5
1927		gi|16765408|ref|NP_461023.1| bifunctional phosphoribosyl-AMP cyclohydrolase/pho	5
1928		gi|16765411|ref|NP_461026.1| 6-phosphogluconate dehydrogenase [Salmonella enter	5
1929		gi|16765419|ref|NP_461034.1| CDP-abequose synthase [Salmonella enterica subsp.	5
1930		gi|16765439|ref|NP_461054.1| GDP-D-mannose dehydratase [Salmonella enterica sub	5
1931		gi|16765459|ref|NP_461074.1| multidrug efflux system protein MdtE [Salmonella e	5
1932		gi|16765461|ref|NP_461076.1| DNA-binding transcriptional regulator BaeR [Salmon	5
1933		gi|16765500|ref|NP_461115.1| hypothetical protein STM2170 [Salmonella enterica	5
1934		gi|39546337|ref|NP_461155.2| elongation factor P [Salmonella enterica subsp. en	5
1935		gi|16765541|ref|NP_461156.1| cobalamin biosynthetic protein [Salmonella enteric	5
1936		gi|16765546|ref|NP_461161.1| ABC-type dipeptide/oligopeptide/nickel transport s	5
1937		gi|16765572|ref|NP_461187.1| virulence protein [Salmonella enterica subsp. ente	5
1938		gi|16765588|ref|NP_461203.1| assembly protein for periplasmic nitrate reductase	5
1939		gi|16765591|ref|NP_461206.1| multidrug transporter membrane component/ATP-bindi	5
1940		gi|16765599|ref|NP_461214.1| DNA gyrase subunit A [Salmonella enterica subsp. e	5
1941		gi|16765606|ref|NP_461221.1| 2Fe-2S ferredoxin YfaE [Salmonella enterica subsp.	5
1942		gi|16765610|ref|NP_461225.1| sn-glycerol-3-phosphate transporter [Salmonella en	5
1943		gi|308065958|ref|NP_461229.2| deubiquitinase [Salmonella enterica subsp. enteri	5
1944		gi|16765628|ref|NP_461243.1| 4-amino-4-deoxy-L-arabinose transferase [Salmonell	5
1945		gi|16765630|ref|NP_461245.1| hypothetical protein STM2303 [Salmonella enterica	5
1946		gi|16765635|ref|NP_461250.1| acyl-CoA thioester hydrolase YfbB [Salmonella ente	5
1947		gi|16765638|ref|NP_461253.1| hypothetical protein STM2311 [Salmonella enterica	5
1948		gi|16765655|ref|NP_461270.1| NADH dehydrogenase subunit A [Salmonella enterica	5
1949		gi|16765659|ref|NP_461274.1| hypothetical protein STM2332 [Salmonella enterica	5
1950		gi|16765675|ref|NP_461290.1| glutathione S-transferase [Salmonella enterica sub	5
1951		gi|16765717|ref|NP_461332.1| cytoplasmic protein [Salmonella enterica subsp. en	5
1952		gi|16765723|ref|NP_461338.1| phosphoglycerate transport system sensor protein [	5
1953		gi|16765730|ref|NP_461345.1| hypothetical protein STM2404 [Salmonella enterica	5
1954		gi|16765770|ref|NP_461385.1| N-acetylmuramoyl-l-alanine amidase I [Salmonella e	5
1955		gi|16765772|ref|NP_461387.1| inner membrane protein [Salmonella enterica subsp.	5
1956		gi|16765785|ref|NP_461400.1| detox protein [Salmonella enterica subsp. enterica	5
1957		gi|16765789|ref|NP_461404.1| ethanolamine utilization protein [Salmonella enter	5
1958		gi|16765796|ref|NP_461411.1| periplasmic protein [Salmonella enterica subsp. en	5
1959		gi|16765797|ref|NP_461412.1| pyrophosphohydrolase [Salmonella enterica subsp. e	5
1960		gi|161353589|ref|NP_461425.2| glycine cleavage system transcriptional repressor	5
1961		gi|16765815|ref|NP_461430.1| arsenate reductase [Salmonella enterica subsp. ent	5
1962		gi|16765816|ref|NP_461431.1| DNA replication initiation factor [Salmonella ente	5
1963		gi|16765838|ref|NP_461453.1| cytoplasmic protein [Salmonella enterica subsp. en	5
1964		gi|16765839|ref|NP_461454.1| GTP-binding protein EngA [Salmonella enterica subs	5
1965		gi|16765877|ref|NP_461492.1| DNA-binding transcriptional activator CadC [Salmon	5
1966		gi|16765882|ref|NP_461497.1| transcriptional regulator [Salmonella enterica sub	5
1967		gi|16765898|ref|NP_461513.1| pyridoxine 5'-phosphate synthase [Salmonella enter	5
1968		gi|16765902|ref|NP_461517.1| signal peptidase I [Salmonella enterica subsp. ent	5
1969		gi|16765918|ref|NP_461533.1| major tail-like protein [Salmonella enterica subsp	5
1970		gi|16765920|ref|NP_461535.1| virulence protein [Phage Gifsy-1]	5
1971		gi|16765921|ref|NP_461536.1| minor tail protein Z-like [Salmonella enterica sub	5
1972		gi|16765942|ref|NP_461557.1| hypothetical protein STM2622 [Salmonella enterica	5
1973		gi|16765954|ref|NP_461569.1| cytoplasmic protein [Phage Gifsy-1]	5
1974		gi|16765955|ref|NP_461570.1| excisionase-like protein [Phage Gifsy-1]	5
1975		gi|16765956|ref|NP_461571.1| integrase-like protein [Salmonella enterica subsp.	5
1976		gi|16765967|ref|NP_461582.1| uracil-DNA glycosylase [Salmonella enterica subsp.	5
1977		gi|16765983|ref|NP_461598.1| cytoplasmic protein [Salmonella enterica subsp. en	5
1978		gi|16765986|ref|NP_461601.1| periplasmic protein [Salmonella enterica subsp. en	5
1979		gi|16765998|ref|NP_461613.1| inorganic polyphosphate/ATP-NAD kinase [Salmonella	5
1980		gi|16766021|ref|NP_461636.1| phage tail-like protein [Salmonella enterica subsp	5
1981		gi|16766050|ref|NP_461665.1| hypothetical protein STM2738 [Enterobacteria phage	5
1982		gi|16766061|ref|NP_461676.1| cytoplasmic protein [Salmonella enterica subsp. en	5
1983		gi|16766067|ref|NP_461682.1| hexulose 6 phosphate synthase [Salmonella enterica	5
1984		gi|16766077|ref|NP_461692.1| transposase [Salmonella enterica subsp. enterica s	5
1985		gi|16766134|ref|NP_461749.1| recombination regulator RecX [Salmonella enterica	5
1986		gi|16766143|ref|NP_461758.1| DNA-binding transcriptional repressor SrlR [Salmon	5
1987		gi|16766154|ref|NP_461769.1| formate hydrogenlyase complex iron-sulfur subunit	5
1988		gi|16766165|ref|NP_461780.1| formate hydrogen-lyase transcriptional activator [	5
1989		gi|16766170|ref|NP_461785.1| permease [Salmonella enterica subsp. enterica sero	5
1990		gi|16766175|ref|NP_461790.1| needle complex export protein [Salmonella enterica	5
1991		gi|16766180|ref|NP_461795.1| needle complex inner membrane protein [Salmonella	5
1992		gi|16766201|ref|NP_461816.1| secretion chaperone [Salmonella enterica subsp. en	5
1993		gi|16766241|ref|NP_461856.1| sulfate adenylyltransferase subunit 2 [Salmonella	5
1994		gi|16766247|ref|NP_461862.1| cytoplasmic protein [Salmonella enterica subsp. en	5
1995		gi|16766254|ref|NP_461869.1| sulfite reductase subunit alpha [Salmonella enteri	5
1996		gi|16766268|ref|NP_461883.1| D-glucarate permease [Salmonella enterica subsp. e	5
1997		gi|16766279|ref|NP_461894.1| L-fuculose phosphate aldolase [Salmonella enterica	5
1998		gi|16766293|ref|NP_461908.1| N-acetylmuramoyl-L-alanine amidase [Salmonella ent	5
1999		gi|16766299|ref|NP_461914.1| hypothetical protein STM2997 [Salmonella enterica	5
[truncated: 2,473 more rows]
