# Supplementary material for: Functional and Computational Analysis of Amino Acid Patterns Predictive of Type III Secretion System Substrates in Pseudomonas syringae
Source: PLoS One. 2012 Apr 27;7(4):e36038. doi: 10.1371/journal.pone.0036038 (PMC3338616; doi:10.1371/journal.pone.0036038)
Supplement: Table S5 — TEREE algorithm scores for annotated coding regions in R. solanacearum GMI1000. (XLSX) [file pone.0036038.s005.xlsx]

## Sheet: Sheet1
RANK	Validated T3SS substrates	Definition	TEREE Score
1	RSc1475	gi|17546194|ref|NP_519596.1| hypothetical protein RSc1475 [Ralstonia solanacear	-37
2	RSp0213	gi|17548434|ref|NP_521774.1| hypothetical protein RS05218 [Ralstonia solanacear	-33
3	extracellular flagellum component	gi|17548561|ref|NP_521901.1| negative regulator of flagellin synthesis (anti-si	-33
4	RSp1384	gi|17549603|ref|NP_522943.1| putative transmembrane protein [Ralstonia solanace	-33
5	RSc3369 (HopX)	gi|17548086|ref|NP_521488.1| AVRPPHE avirulence protein [Ralstonia solanacearum	-31
6	RSp0731 (putative effector)	gi|17548952|ref|NP_522292.1| trehalose-6-phosphate synthase [Ralstonia solanace	-31
7	RSp1277 (HopAA1)	gi|17549496|ref|NP_522836.1| putative transmembrane protein [Ralstonia solanace	-31
8	RSc0826 (PopP1)	gi|17545545|ref|NP_518947.1| POPP protein [Ralstonia solanacearum GMI1000]	-29
9		gi|17546317|ref|NP_519719.1| two-component transmembrane sensor histidine kinas	-29
10	RSp0099 (AWR2)	gi|17548320|ref|NP_521660.1| AWR protein 1 [Ralstonia solanacearum GMI1000]	-29
11	RSp1555 (PopF1)	gi|17549774|ref|NP_523114.1| secreted protein POPF1 [Ralstonia solanacearum GMI	-29
12		gi|17547814|ref|NP_521216.1| serine-rich protein [Ralstonia solanacearum GMI100	-28
13		gi|17545970|ref|NP_519372.1| ATP-dependent RNA helicase [Ralstonia solanacearum	-27
14	RSc1386 (HLK1)	gi|17546105|ref|NP_519507.1| hypothetical protein RSc1386 [Ralstonia solanacear	-25
15	RSc2139	gi|17546858|ref|NP_520260.1| AWR family protein [Ralstonia solanacearum GMI1000	-25
16		gi|17547077|ref|NP_520479.1| phosphoenolpyruvate carboxylase [Ralstonia solanac	-25
17	RSc2359	gi|17547078|ref|NP_520480.1| hypothetical protein RSc2359 [Ralstonia solanacear	-25
18	HrpV/HpaA (putative substrate)	gi|17549079|ref|NP_522419.1| hypothetical protein RSp0858 [Ralstonia solanacear	-25
19	RSp1022	gi|17549243|ref|NP_522583.1| hypothetical protein RS02359 [Ralstonia solanacear	-25
20		gi|17549292|ref|NP_522632.1| putative hemagglutinin-related protein [Ralstonia	-25
21	RSp0296 (SWKP5)	gi|17548517|ref|NP_521857.1| hypothetical protein RS05479 [Ralstonia solanacear	-23
22		gi|17549862|ref|NP_523202.1| hypothetical protein RS02202 [Ralstonia solanacear	-23
23		gi|17546261|ref|NP_519663.1| transmembrane protein [Ralstonia solanacearum GMI1	-22
24		gi|17547358|ref|NP_520760.1| HEAT shock protein 24 [Ralstonia solanacearum GMI1	-22
25	RSp0304 (AvrPphD)	gi|17545240|ref|NP_518642.1| hypothetical protein RSc0521 [Ralstonia solanacear	-21
26	RSc0824	gi|17545543|ref|NP_518945.1| hypothetical protein RSc0824 [Ralstonia solanacear	-21
27	RSc0895	gi|17545614|ref|NP_519016.1| hypothetical protein RSc0895 [Ralstonia solanacear	-21
28		gi|17548462|ref|NP_521802.1| putative alpha-amylase-related protein [Ralstonia	-21
29	RSp0304	gi|17548525|ref|NP_521865.1| hypothetical protein RS05468 [Ralstonia solanacear	-21
30	RSp1130	gi|17549351|ref|NP_522691.1| hypothetical protein RS05488 [Ralstonia solanacear	-21
31	RSp1374 (SKWP2)	gi|17549593|ref|NP_522933.1| hypothetical protein RS02084 [Ralstonia solanacear	-21
32	RSc0257	gi|17544976|ref|NP_518378.1| ankyrin repeat-containing protein [Ralstonia solan	-20
33	RSc2101	gi|17546820|ref|NP_520222.1| hypothetical protein RSc2101 [Ralstonia solanacear	-20
34	RSp0847 (AWR4)	gi|17549068|ref|NP_522408.1| AWR family protein [Ralstonia solanacearum GMI1000	-20
35	RSc0608 (AvrA)	gi|17545327|ref|NP_518729.1| type III effector protein AvrA [Ralstonia solanace	-19
36	RSc1357 (GALA7)	gi|17546076|ref|NP_519478.1| GALA protein 5 [Ralstonia solanacearum GMI1000]	-19
37		gi|17546369|ref|NP_519771.1| signal peptide protein [Ralstonia solanacearum GMI	-19
38		gi|17546880|ref|NP_520282.1| coproporphyrinogen III oxidase [Ralstonia solanace	-19
39		gi|17547788|ref|NP_521190.1| transporter transmembrane protein [Ralstonia solan	-19
40		gi|17547848|ref|NP_521250.1| transcription regulator protein [Ralstonia solanac	-19
41		gi|17548547|ref|NP_521887.1| organic hydroperoxide resistance protein [Ralstoni	-19
42	extracellular flagellum component	gi|17548565|ref|NP_521905.1| basal-body rod modification protein FlgD [Ralstoni	-19
43	RSp0732 (HopAV1)	gi|17548953|ref|NP_522293.1| putative transmembrane protein [Ralstonia solanace	-19
44		gi|17549058|ref|NP_522398.1| hypothetical protein RS05358 [Ralstonia solanacear	-19
45	RSp0879	gi|17549100|ref|NP_522440.1| hypothetical protein RS01650 [Ralstonia solanacear	-19
46	RSp0900 (PopF2)	gi|17549121|ref|NP_522461.1| secreted protein POPF2 [Ralstonia solanacearum GMI	-19
47		gi|17546424|ref|NP_519826.1| hypothetical protein RSc1705 [Ralstonia solanacear	-18
48		gi|17545704|ref|NP_519106.1| aminotransferase [Ralstonia solanacearum GMI1000]	-17
49		gi|17545722|ref|NP_519124.1| carboxypeptidase [Ralstonia solanacearum GMI1000]	-17
50	RSp0914 (GALA1)	gi|17549135|ref|NP_522475.1| GALA protein 1 [Ralstonia solanacearum GMI1000]	-17
51		gi|17546284|ref|NP_519686.1| FKBP-type peptidyl-prolyl cis-trans isomerase sign	-17
52		gi|17546697|ref|NP_520099.1| hypothetical protein RSc1978 [Ralstonia solanacear	-17
53		gi|17547254|ref|NP_520656.1| transcription regulator protein [Ralstonia solanac	-17
54		gi|17547291|ref|NP_520693.1| lipoprotein [Ralstonia solanacearum GMI1000]	-17
55		gi|17549386|ref|NP_522726.1| putative signal peptide protein [Ralstonia solanac	-17
56	RSc1801 (GALA5)	gi|17546520|ref|NP_519922.1| GALA protein 3 [Ralstonia solanacearum GMI1000]	-16
57		gi|17547200|ref|NP_520602.1| hypothetical protein RSc2481 [Ralstonia solanacear	-16
58		gi|17549634|ref|NP_522974.1| hypothetical protein RS03126 [Ralstonia solanacear	-16
59		gi|17545663|ref|NP_519065.1| hypothetical protein RSc0944 [Ralstonia solanacear	-15
60		gi|17545924|ref|NP_519326.1| hypothetical protein RSc1205 [Ralstonia solanacear	-15
61		gi|17546017|ref|NP_519419.1| enoyl-CoA hydratase [Ralstonia solanacearum GMI100	-15
62	RSc1356 (GALA6)	gi|17546075|ref|NP_519477.1| GALA protein 4 [Ralstonia solanacearum GMI1000]	-15
63		gi|17546235|ref|NP_519637.1| membrane-bound lytic murein transglycosylase-like	-15
64		gi|17546446|ref|NP_519848.1| hypothetical protein RSc1727 [Ralstonia solanacear	-15
65		gi|17546708|ref|NP_520110.1| isopropylmalate isomerase small subunit [Ralstonia	-15
66		gi|17546716|ref|NP_520118.1| transcription regulator protein [Ralstonia solanac	-15
67		gi|17546726|ref|NP_520128.1| lipoprotein transmembrane [Ralstonia solanacearum	-15
68		gi|17546753|ref|NP_520155.1| urease accessory UREJ transmembrane protein [Ralst	-15
69		gi|17546998|ref|NP_520400.1| signal peptide protein [Ralstonia solanacearum GMI	-15
70		gi|17547203|ref|NP_520605.1| hypothetical protein RSc2484 [Ralstonia solanacear	-15
71		gi|17547523|ref|NP_520925.1| ribonucleotide-diphosphate reductase subunit beta	-15
72		gi|17547684|ref|NP_521086.1| glutamate synthase (large subunit) oxidoreductase	-15
73		gi|17547780|ref|NP_521182.1| substrate-binding periplasmic (PBP) ABC transporte	-15
74		gi|17547894|ref|NP_521296.1| hypothetical protein RSc3175 [Ralstonia solanacear	-15
75		gi|17547923|ref|NP_521325.1| hypothetical protein RSc3204 [Ralstonia solanacear	-15
76		gi|17547926|ref|NP_521328.1| transcription regulator protein [Ralstonia solanac	-15
77		gi|17547936|ref|NP_521338.1| hypothetical protein RSc3217 [Ralstonia solanacear	-15
78		gi|17548024|ref|NP_521426.1| methyl-accepting chemotaxis transmembrane protein	-15
79		gi|17548041|ref|NP_521443.1| hypothetical protein RSc3324 [Ralstonia solanacear	-15
80		gi|17548330|ref|NP_521670.1| hypothetical protein RS03013 [Ralstonia solanacear	-15
81	extracellular flagellum component	gi|17548604|ref|NP_521944.1| flagellar hook-associated protein 2 [Ralstonia sol	-15
82		gi|17548761|ref|NP_522101.1| hemagglutinin-related protein [Ralstonia solanacea	-15
83	RSp0838	gi|17549059|ref|NP_522399.1| hypothetical protein RS05357 [Ralstonia solanacear	-15
84	RSp0854	gi|17549076|ref|NP_522416.1| Hrp pilus subunit HRPY protein [Ralstonia solanace	-15
85	RSp0866	gi|17549087|ref|NP_522427.1| HRPJ protein [Ralstonia solanacearum GMI1000]	-15
86		gi|17549623|ref|NP_522963.1| chemotaxis protein [Ralstonia solanacearum GMI1000	-15
87		gi|17549856|ref|NP_523196.1| transcription regulator transcription regulator pr	-15
88		gi|17549893|ref|NP_523233.1| hypothetical protein RS02233 [Ralstonia solanacear	-15
89		gi|17544973|ref|NP_518375.1| hypothetical protein RSc0254 [Ralstonia solanacear	-14
90	RSc0321	gi|17545040|ref|NP_518442.1| hypothetical protein RSc0321 [Ralstonia solanacear	-14
91		gi|17547068|ref|NP_520470.1| inorganic pyrophosphatase [Ralstonia solanacearum	-14
92		gi|17547119|ref|NP_520521.1| outer membrane receptor protein [Ralstonia solanac	-14
93		gi|17548978|ref|NP_522318.1| hypothetical protein RS01951 [Ralstonia solanacear	-14
94		gi|17549401|ref|NP_522741.1| putative hemagglutinin/hemolysin-related protein [	-14
95		gi|17549662|ref|NP_523002.1| putative signal peptide protein [Ralstonia solanac	-14
96	RSc0041	gi|17544760|ref|NP_518162.1| hypothetical protein RSc0041 [Ralstonia solanacear	-13
97		gi|17544871|ref|NP_518273.1| lipoprotein [Ralstonia solanacearum GMI1000]	-13
98		gi|17544946|ref|NP_518348.1| hypothetical protein RSc0227 [Ralstonia solanacear	-13
99		gi|17544954|ref|NP_518356.1| hypothetical protein RSc0235 [Ralstonia solanacear	-13
100		gi|17545012|ref|NP_518414.1| signal peptide protein [Ralstonia solanacearum GMI	-13
101		gi|17545422|ref|NP_518824.1| tRNA (guanine-N(7))-methyltransferase [Ralstonia s	-13
102		gi|17545571|ref|NP_518973.1| bacteriophage-related protein [Ralstonia solanacea	-13
103		gi|17545683|ref|NP_519085.1| bacteriophage transcriptional activator-related tr	-13
104		gi|17545769|ref|NP_519171.1| 3-oxoacyl-(acyl carrier protein) synthase III [Ral	-13
105		gi|17546033|ref|NP_519435.1| lipoprotein transmembrane [Ralstonia solanacearum	-13
106		gi|17546139|ref|NP_519541.1| hypothetical protein RSc1420 [Ralstonia solanacear	-13
107		gi|17546328|ref|NP_519730.1| D-alanyl-D-alanine-endopeptidase (penicillin-bindi	-13
108		gi|17546417|ref|NP_519819.1| bacteriophage protein [Ralstonia solanacearum GMI1	-13
109	RSc1723 (putative effector)	gi|17546442|ref|NP_519844.1| hypothetical protein RSc1723 [Ralstonia solanacear	-13
110		gi|17546720|ref|NP_520122.1| signal peptide protein [Ralstonia solanacearum GMI	-13
111		gi|17546862|ref|NP_520264.1| transmembrane ABC transporter protein [Ralstonia s	-13
112		gi|17546883|ref|NP_520285.1| signal peptide protein [Ralstonia solanacearum GMI	-13
113		gi|17547132|ref|NP_520534.1| hypothetical protein RSc2413 [Ralstonia solanacear	-13
114		gi|17547244|ref|NP_520646.1| hypothetical protein RSc2525 [Ralstonia solanacear	-13
115		gi|17547758|ref|NP_521160.1| transcription antitermination protein NusG [Ralsto	-13
116		gi|17548365|ref|NP_521705.1| prolin-rich transmembrane protein [Ralstonia solan	-13
117		gi|17548472|ref|NP_521812.1| ferrous IRON transport B transmembrane protein [Ra	-13
118		gi|17548610|ref|NP_521950.1| flagellar hook-basal body protein FliE [Ralstonia	-13
119		gi|17548630|ref|NP_521970.1| hypothetical protein RS00866 [Ralstonia solanacear	-13
120		gi|17548800|ref|NP_522140.1| putative bacteriophage-related protein [Ralstonia	-13
121		gi|17548824|ref|NP_522164.1| putative serine protease protein [Ralstonia solana	-13
122		gi|17548921|ref|NP_522261.1| hypothetical protein RS01749 [Ralstonia solanacear	-13
123	RSp0822 (HopF2)	gi|17549043|ref|NP_522383.1| hypothetical protein RS05373 [Ralstonia solanacear	-13
124	RSp0876 (PopB)	gi|17549097|ref|NP_522437.1| POPB protein [Ralstonia solanacearum GMI1000]	-13
125		gi|17549186|ref|NP_522526.1| putative ribonucleotide reductase activating trans	-13
126		gi|17549314|ref|NP_522654.1| putative hemagglutinin-related transmembrane prote	-13
127		gi|17549315|ref|NP_522655.1| putative hemagglutinin-related transmembrane prote	-13
128	RSp1281 (HopR1)	gi|17549500|ref|NP_522840.1| hypothetical protein RS05326 [Ralstonia solanacear	-13
129		gi|17549549|ref|NP_522889.1| hypothetical protein RS05650 [Ralstonia solanacear	-13
130		gi|17549580|ref|NP_522920.1| hypothetical protein RS04826 [Ralstonia solanacear	-13
131		gi|17549889|ref|NP_523229.1| putative signal peptide protein [Ralstonia solanac	-13
132		gi|17544885|ref|NP_518287.1| outer membrane channel lipoprotein [Ralstonia sola	-12
133		gi|17545685|ref|NP_519087.1| hypothetical protein RSc0966 [Ralstonia solanacear	-12
134		gi|17547817|ref|NP_521219.1| hypothetical protein RSc3098 [Ralstonia solanacear	-12
135	RSp0193	gi|17548414|ref|NP_521754.1| putative PPR repeats containing protein [Ralstonia	-12
136		gi|17549023|ref|NP_522363.1| hypothetical protein RS01905 [Ralstonia solanacear	-12
137		gi|17549742|ref|NP_523082.1| hypothetical protein RS04800 [Ralstonia solanacear	-12
138		gi|17544724|ref|NP_518126.1| tRNA modification GTPase TrmE [Ralstonia solanacea	-11
139		gi|17544763|ref|NP_518165.1| substrate-binding periplasmic (PBP) ABC transporte	-11
140		gi|17544824|ref|NP_518226.1| hypothetical protein RSc0105 [Ralstonia solanacear	-11
141		gi|17545052|ref|NP_518454.1| transmembrane protein [Ralstonia solanacearum GMI1	-11
142		gi|17545316|ref|NP_518718.1| hypothetical protein RSc0597 [Ralstonia solanacear	-11
143		gi|17545355|ref|NP_518757.1| hypothetical protein RSc0636 [Ralstonia solanacear	-11
144		gi|17545391|ref|NP_518793.1| composite two component regulatory (sensor histidi	-11
145		gi|17545484|ref|NP_518886.1| hypothetical protein RSc0765 [Ralstonia solanacear	-11
146		gi|17545488|ref|NP_518890.1| hydrolase glycosidase [Ralstonia solanacearum GMI1	-11
147	RSc0868 (PopP2)	gi|17545587|ref|NP_518989.1| YOPP/AvrRxv family protein [Ralstonia solanacearum	-11
148		gi|17545596|ref|NP_518998.1| hypothetical protein RSc0877 [Ralstonia solanacear	-11
149		gi|17545661|ref|NP_519063.1| oligoribonuclease [Ralstonia solanacearum GMI1000]	-11
150		gi|17545669|ref|NP_519071.1| hypothetical protein RSc0950 [Ralstonia solanacear	-11
151		gi|17545897|ref|NP_519299.1| lipoprotein transmembrane [Ralstonia solanacearum	-11
152		gi|17545993|ref|NP_519395.1| cation-transporting ATPase lipoprotein transmembra	-11
153		gi|17546292|ref|NP_519694.1| hypothetical protein RSc1573 [Ralstonia solanacear	-11
154		gi|17546341|ref|NP_519743.1| hypothetical protein RSc1622 [Ralstonia solanacear	-11
155		gi|17546440|ref|NP_519842.1| hypothetical protein RSc1721 [Ralstonia solanacear	-11
156		gi|17546532|ref|NP_519934.1| transcription regulator protein [Ralstonia solanac	-11
157		gi|17546597|ref|NP_519999.1| lipoprotein [Ralstonia solanacearum GMI1000]	-11
158		gi|17546627|ref|NP_520029.1| signal peptide protein [Ralstonia solanacearum GMI	-11
159		gi|17546639|ref|NP_520041.1| tail fiber assembly-like protein [Ralstonia solana	-11
160		gi|17546723|ref|NP_520125.1| signal peptide protein [Ralstonia solanacearum GMI	-11
161		gi|17546790|ref|NP_520192.1| hypothetical protein RSc2071 [Ralstonia solanacear	-11
162		gi|17546875|ref|NP_520277.1| hypothetical protein RSc2156 [Ralstonia solanacear	-11
163		gi|17546939|ref|NP_520341.1| GTP cyclohydrolase [Ralstonia solanacearum GMI1000	-11
164		gi|17546950|ref|NP_520352.1| hypothetical protein RSc2231 [Ralstonia solanacear	-11
165		gi|17546981|ref|NP_520383.1| D-amino acid dehydrogenase small subunit [Ralstoni	-11
166		gi|17547038|ref|NP_520440.1| hypothetical protein RSc2319 [Ralstonia solanacear	-11
167		gi|17547057|ref|NP_520459.1| recombination factor protein RarA [Ralstonia solan	-11
168		gi|17547096|ref|NP_520498.1| proline rich protein [Ralstonia solanacearum GMI10	-11
169		gi|17547175|ref|NP_520577.1| composite two-component regulatory (sensor kinase	-11
170		gi|17547516|ref|NP_520918.1| hemagglutinin-related transmembrane protein [Ralst	-11
171	RSc3290 (HopH)	gi|17548007|ref|NP_521409.1| hypothetical protein RSc3290 [Ralstonia solanacear	-11
172		gi|17548031|ref|NP_521433.1| hypothetical protein RSc3314 [Ralstonia solanacear	-11
173		gi|17548310|ref|NP_521650.1| hypothetical protein RS05532 [Ralstonia solanacear	-11
174		gi|17548404|ref|NP_521744.1| putative hemagglutinin-related protein [Ralstonia	-11
175	extracellular flagellum component	gi|17548603|ref|NP_521943.1| flagellin protein [Ralstonia solanacearum GMI1000]	-11
176		gi|17548679|ref|NP_522019.1| rhs-related protein [Ralstonia solanacearum GMI100	-11
177		gi|17548712|ref|NP_522052.1| cobalt-zinc-cadmium outer membrane resistance prot	-11
178		gi|17548722|ref|NP_522062.1| hypothetical protein RS00380 [Ralstonia solanacear	-11
179	RSp0572 (HopH)	gi|17548793|ref|NP_522133.1| hypothetical protein RS03907 [Ralstonia solanacear	-11
180		gi|17548817|ref|NP_522157.1| hypothetical protein RS03883 [Ralstonia solanacear	-11
181		gi|17549119|ref|NP_522459.1| thiol:disulfide interchange signal peptide protein	-11
182		gi|17549539|ref|NP_522879.1| putative DNA-binding transcriptional regulatory tr	-11
183		gi|17549570|ref|NP_522910.1| putative transcription regulator protein [Ralstoni	-11
184		gi|17549745|ref|NP_523085.1| hypothetical protein RS04803 [Ralstonia solanacear	-11
185		gi|17549750|ref|NP_523090.1| hypothetical protein RS06038 [Ralstonia solanacear	-11
186		gi|17549775|ref|NP_523115.1| putative transcription regulation repressor HEXR t	-11
187		gi|17544866|ref|NP_518268.1| signal peptide protein [Ralstonia solanacearum GMI	-10
188		gi|17545734|ref|NP_519136.1| transmembrane ABC transporter protein [Ralstonia s	-10
189		gi|17546016|ref|NP_519418.1| transmembrane protein [Ralstonia solanacearum GMI1	-10
190		gi|17547407|ref|NP_520809.1| hypothetical protein RSc2688 [Ralstonia solanacear	-10
191		gi|17548620|ref|NP_521960.1| hypothetical protein RS00827 [Ralstonia solanacear	-10
192		gi|17548707|ref|NP_522047.1| hypothetical protein RS00364 [Ralstonia solanacear	-10
193		gi|17548871|ref|NP_522211.1| methylmalonate-semialdehyde dehydrogenase oxidored	-10
194		gi|17548982|ref|NP_522322.1| lipoprotein [Ralstonia solanacearum GMI1000]	-10
195		gi|17549032|ref|NP_522372.1| tonb-dependent receptor signal peptide protein [Ra	-10
196		gi|17549325|ref|NP_522665.1| trehalose-phosphatase protein [Ralstonia solanacea	-10
197		gi|17549650|ref|NP_522990.1| putative oxidoreductase signal peptide protein [Ra	-10
198		gi|17544935|ref|NP_518337.1| transport transmembrane protein [Ralstonia solanac	-9
199		gi|17545041|ref|NP_518443.1| lipoyl synthase [Ralstonia solanacearum GMI1000]	-9
200		gi|17545407|ref|NP_518809.1| glycosyl transferase [Ralstonia solanacearum GMI10	-9
201		gi|17545426|ref|NP_518828.1| hypothetical protein RSc0707 [Ralstonia solanacear	-9
202		gi|17545561|ref|NP_518963.1| hypothetical protein RSc0842 [Ralstonia solanacear	-9
203		gi|17545606|ref|NP_519008.1| hemagglutinin-related protein [Ralstonia solanacea	-9
204		gi|17545667|ref|NP_519069.1| hypothetical protein RSc0948 [Ralstonia solanacear	-9
205		gi|17545680|ref|NP_519082.1| hypothetical protein RSc0961 [Ralstonia solanacear	-9
206		gi|17545721|ref|NP_519123.1| hypothetical protein RSc1002 [Ralstonia solanacear	-9
207		gi|17545797|ref|NP_519199.1| transcriptional regulatory DNA-binding transcripti	-9
208		gi|17545829|ref|NP_519231.1| transcriptional regulatory DNA-binding transcripti	-9
209		gi|17545868|ref|NP_519270.1| fkbp-type peptidyl-prolyl cis-trans isomerase (rot	-9
210		gi|17545922|ref|NP_519324.1| oxidoreductase [Ralstonia solanacearum GMI1000]	-9
211		gi|17546022|ref|NP_519424.1| hypothetical protein RSc1303 [Ralstonia solanacear	-9
212		gi|17546104|ref|NP_519506.1| lipoprotein transmembrane [Ralstonia solanacearum	-9
213		gi|17546113|ref|NP_519515.1| hypothetical protein RSc1394 [Ralstonia solanacear	-9
214		gi|17546231|ref|NP_519633.1| hypothetical protein RSc1512 [Ralstonia solanacear	-9
215		gi|17546287|ref|NP_519689.1| short chain dehydrogenase [Ralstonia solanacearum	-9
216		gi|17546337|ref|NP_519739.1| hypothetical protein RSc1618 [Ralstonia solanacear	-9
217		gi|17546340|ref|NP_519742.1| potassium uptake transmembrane protein [Ralstonia	-9
218		gi|17546371|ref|NP_519773.1| phytoene synthase [Ralstonia solanacearum GMI1000]	-9
219		gi|17546496|ref|NP_519898.1| lipoprotein transmembrane [Ralstonia solanacearum	-9
220		gi|17546802|ref|NP_520204.1| hypothetical protein RSc2083 [Ralstonia solanacear	-9
221		gi|17546804|ref|NP_520206.1| diacylglycerol kinase transmembrane protein [Ralst	-9
222		gi|17546841|ref|NP_520243.1| hypothetical protein RSc2122 [Ralstonia solanacear	-9
223		gi|17546874|ref|NP_520276.1| guanylate kinase [Ralstonia solanacearum GMI1000]	-9
224		gi|17546900|ref|NP_520302.1| hypothetical protein RSc2181 [Ralstonia solanacear	-9
225		gi|17546955|ref|NP_520357.1| valyl-tRNA synthetase [Ralstonia solanacearum GMI1	-9
226		gi|17547010|ref|NP_520412.1| transglycosylase [Ralstonia solanacearum GMI1000]	-9
227		gi|17547215|ref|NP_520617.1| signal peptide protein [Ralstonia solanacearum GMI	-9
228		gi|17547395|ref|NP_520797.1| hypothetical protein RSc2676 [Ralstonia solanacear	-9
229		gi|17547419|ref|NP_520821.1| hypothetical protein RSc2700 [Ralstonia solanacear	-9
230		gi|17547528|ref|NP_520930.1| hypothetical protein RSc2809 [Ralstonia solanacear	-9
231		gi|17547607|ref|NP_521009.1| hypothetical protein RSc2888 [Ralstonia solanacear	-9
232		gi|17547609|ref|NP_521011.1| hypothetical protein RSc2890 [Ralstonia solanacear	-9
233		gi|17547612|ref|NP_521014.1| hypothetical protein RSc2893 [Ralstonia solanacear	-9
234		gi|17547743|ref|NP_521145.1| 30S ribosomal protein S12 [Ralstonia solanacearum	-9
235		gi|17547892|ref|NP_521294.1| bacteriophage-related protein [Ralstonia solanacea	-9
236	RSc3212 (RipT)	gi|17547931|ref|NP_521333.1| hypothetical protein RSc3212 [Ralstonia solanacear	-9
237		gi|17548030|ref|NP_521432.1| hypothetical protein RSc3313 [Ralstonia solanacear	-9
238		gi|17548100|ref|NP_521502.1| potassium-transporting ATPase B chain [Ralstonia s	-9
239	RSc3401 (SKWP1)	gi|17548118|ref|NP_521520.1| hypothetical protein RSc3401 [Ralstonia solanacear	-9
240		gi|17548222|ref|NP_521562.1| REPA replicase protein [Ralstonia solanacearum GMI	-9
241		gi|17548312|ref|NP_521652.1| hypothetical protein RS05552 [Ralstonia solanacear	-9
242		gi|17548337|ref|NP_521677.1| putative lipoprotein [Ralstonia solanacearum GMI10	-9
243		gi|17548352|ref|NP_521692.1| hypothetical protein RS02990 [Ralstonia solanacear	-9
244		gi|17548356|ref|NP_521696.1| putative hydrolase transmembrane protein [Ralstoni	-9
245	RSp0215	gi|17548436|ref|NP_521776.1| hypothetical protein RS05212 [Ralstonia solanacear	-9
246		gi|17548573|ref|NP_521913.1| flagellar hook-associated protein 3 [Ralstonia sol	-9
247		gi|17548678|ref|NP_522018.1| rhs-related protein [Ralstonia solanacearum GMI100	-9
248		gi|17548688|ref|NP_522028.1| putative general secretion pathway GSPF-related tr	-9
249		gi|17548804|ref|NP_522144.1| exoglucanase A [Ralstonia solanacearum GMI1000]	-9
250		gi|17548814|ref|NP_522154.1| hypothetical protein RS03887 [Ralstonia solanacear	-9
251		gi|17548864|ref|NP_522204.1| hypothetical protein RS05579 [Ralstonia solanacear	-9
252		gi|17549053|ref|NP_522393.1| hypothetical protein RS05363 [Ralstonia solanacear	-9
253		gi|17549165|ref|NP_522505.1| hypothetical protein RS05389 [Ralstonia solanacear	-9
254		gi|17549260|ref|NP_522600.1| putative outer membrane channel lipoprotein transm	-9
255		gi|17549271|ref|NP_522611.1| formate dehydrogenase associated protein [Ralstoni	-9
256		gi|17549365|ref|NP_522705.1| hypothetical protein RS05467 [Ralstonia solanacear	-9
257		gi|17549399|ref|NP_522739.1| composite two-component sensor histidine kinase an	-9
258		gi|17549489|ref|NP_522829.1| putative signal peptide protein [Ralstonia solanac	-9
259		gi|17549513|ref|NP_522853.1| serin-rich transmembrane protein [Ralstonia solana	-9
260		gi|17549555|ref|NP_522895.1| transposase [Ralstonia solanacearum GMI1000]	-9
261		gi|17549747|ref|NP_523087.1| hypothetical protein RS04805 [Ralstonia solanacear	-9
262		gi|17549799|ref|NP_523139.1| hypothetical protein RS02136 [Ralstonia solanacear	-9
263		gi|17549810|ref|NP_523150.1| putative transmembrane aldehyde dehydrogenase oxid	-9
264		gi|17544750|ref|NP_518152.1| nucleoid occlusion protein [Ralstonia solanacearum	-8
265		gi|17545332|ref|NP_518734.1| hypothetical protein RSc0613 [Ralstonia solanacear	-8
266		gi|17545671|ref|NP_519073.1| ATP-dependent RNA helicase [Ralstonia solanacearum	-8
267		gi|17545964|ref|NP_519366.1| protein implicated IN myo-inositol catabolique pat	-8
268		gi|17546030|ref|NP_519432.1| replicative DNA helicase [Ralstonia solanacearum G	-8
269		gi|17546150|ref|NP_519552.1| bifunctional GMP synthase/glutamine amidotransfera	-8
270		gi|17546196|ref|NP_519598.1| adenosylmethionine--8-amino-7-oxononanoate transam	-8
271		gi|17546256|ref|NP_519658.1| exopolyphosphatase [Ralstonia solanacearum GMI1000	-8
272		gi|17546378|ref|NP_519780.1| hypothetical protein RSc1659 [Ralstonia solanacear	-8
273		gi|17546381|ref|NP_519783.1| hypothetical protein RSc1662 [Ralstonia solanacear	-8
274		gi|17546679|ref|NP_520081.1| transcriptional regulatory DNA-binding transcripti	-8
275		gi|17547123|ref|NP_520525.1| signal peptide protein [Ralstonia solanacearum GMI	-8
276		gi|17547218|ref|NP_520620.1| multidrug resistance protein [Ralstonia solanacear	-8
277		gi|17547550|ref|NP_520952.1| 7,8-dihydro-8-oxoguanine-triphosphatase [Ralstonia	-8
278		gi|17547921|ref|NP_521323.1| hypothetical protein RSc3202 [Ralstonia solanacear	-8
279		gi|17548124|ref|NP_521526.1| oxidoreductase [Ralstonia solanacearum GMI1000]	-8
280		gi|17548150|ref|NP_521552.1| hypothetical protein RSc3433 [Ralstonia solanacear	-8
281		gi|17548912|ref|NP_522252.1| homogentisate 1,2-dioxygenase [Ralstonia solanacea	-8
282		gi|17549046|ref|NP_522386.1| hypothetical protein RS05370 [Ralstonia solanacear	-8
283		gi|17549446|ref|NP_522786.1| isopentenyl transferase protein [Ralstonia solanac	-8
284		gi|17549608|ref|NP_522948.1| hypothetical protein RS02069 [Ralstonia solanacear	-8
285		gi|17549633|ref|NP_522973.1| hypothetical protein RS05841 [Ralstonia solanacear	-8
286		gi|17544734|ref|NP_518136.1| hypothetical protein RSc0015 [Ralstonia solanacear	-7
287		gi|17544788|ref|NP_518190.1| signal peptide protein [Ralstonia solanacearum GMI	-7
288		gi|17544857|ref|NP_518259.1| hypothetical protein RSc0138 [Ralstonia solanacear	-7
289		gi|17544931|ref|NP_518333.1| aspartate racemase [Ralstonia solanacearum GMI1000	-7
290		gi|17544956|ref|NP_518358.1| methylmalonyl-CoA mutase [Ralstonia solanacearum G	-7
291		gi|17544983|ref|NP_518385.1| hypothetical protein RSc0264 [Ralstonia solanacear	-7
292		gi|17545071|ref|NP_518473.1| carboxy-terminal processing protease transmembrane	-7
293		gi|17545080|ref|NP_518482.1| hypothetical protein RSc0361 [Ralstonia solanacear	-7
294		gi|17545149|ref|NP_518551.1| transmembrane protein [Ralstonia solanacearum GMI1	-7
295		gi|17545226|ref|NP_518628.1| amino acid dehydrogenase transmembrane protein [Ra	-7
296		gi|17545252|ref|NP_518654.1| transmembrane protein [Ralstonia solanacearum GMI1	-7
297		gi|17545344|ref|NP_518746.1| transcription regulator protein [Ralstonia solanac	-7
298		gi|17545443|ref|NP_518845.1| type-4 fimbrial biogenesis pily1-related signal pe	-7
299		gi|17545503|ref|NP_518905.1| FKBP-type peptidyl-prolyl cis-trans isomerase [Ral	-7
300		gi|17545568|ref|NP_518970.1| hypothetical protein RSc0849 [Ralstonia solanacear	-7
301		gi|17545611|ref|NP_519013.1| phage-related protein [Ralstonia solanacearum GMI1	-7
302		gi|17545637|ref|NP_519039.1| membrane-bound lytic murein transglycosylase B pro	-7
303		gi|17545650|ref|NP_519052.1| signal peptide protein [Ralstonia solanacearum GMI	-7
304		gi|17545746|ref|NP_519148.1| hypothetical protein RSc1027 [Ralstonia solanacear	-7
305		gi|17545757|ref|NP_519159.1| molybdopterin-guanine dinucleotide biosynthesis pr	-7
306		gi|17545798|ref|NP_519200.1| glucarate dehydratase [Ralstonia solanacearum GMI1	-7
307		gi|17545890|ref|NP_519292.1| aspartate kinase [Ralstonia solanacearum GMI1000]	-7
308		gi|17545919|ref|NP_519321.1| transmembrane permease ABC transporter protein [Ra	-7
309		gi|17545925|ref|NP_519327.1| lipoprotein NLPD/LppB-like protein [Ralstonia sola	-7
310		gi|17545937|ref|NP_519339.1| lipoprotein transmembrane [Ralstonia solanacearum	-7
311		gi|17545978|ref|NP_519380.1| signal peptide protein [Ralstonia solanacearum GMI	-7
312		gi|17545979|ref|NP_519381.1| nitrogen regulation(sensor protein kinase transcri	-7
313		gi|17546012|ref|NP_519414.1| multidrug resistance A (translocase) transmembrane	-7
314		gi|17546023|ref|NP_519425.1| LexA repressor [Ralstonia solanacearum GMI1000]	-7
315		gi|17546155|ref|NP_519557.1| isrso11-transposase orfb protein [Ralstonia solana	-7
316		gi|17546206|ref|NP_519608.1| hypothetical protein RSc1487 [Ralstonia solanacear	-7
317		gi|17546234|ref|NP_519636.1| hydroxyacylglutathione hydrolase [Ralstonia solana	-7
318		gi|17546263|ref|NP_519665.1| hypothetical protein RSc1544 [Ralstonia solanacear	-7
319		gi|17546266|ref|NP_519668.1| hypothetical protein RSc1547 [Ralstonia solanacear	-7
320		gi|17546285|ref|NP_519687.1| chorismate synthase [Ralstonia solanacearum GMI100	-7
321		gi|17546377|ref|NP_519779.1| hypothetical protein RSc1658 [Ralstonia solanacear	-7
322		gi|17546409|ref|NP_519811.1| phage hk97 tail length tape measure-related protei	-7
323		gi|17546498|ref|NP_519900.1| activation/secretion signal peptide protein [Ralst	-7
324		gi|17546509|ref|NP_519911.1| transcription regulator protein [Ralstonia solanac	-7
325	RSc1839 (SKWP4)	gi|17546558|ref|NP_519960.1| hypothetical protein RSc1839 [Ralstonia solanacear	-7
326		gi|17546574|ref|NP_519976.1| hypothetical protein RSc1855 [Ralstonia solanacear	-7
327		gi|17546660|ref|NP_520062.1| bacteriophage protein [Ralstonia solanacearum GMI1	-7
328		gi|17546688|ref|NP_520090.1| hypothetical protein RSc1969 [Ralstonia solanacear	-7
329		gi|17546784|ref|NP_520186.1| NADPH quinone oxidoreductase oxidoreductase [Ralst	-7
330		gi|17546799|ref|NP_520201.1| hypothetical protein RSc2080 [Ralstonia solanacear	-7
331		gi|17546868|ref|NP_520270.1| hypothetical protein RSc2149 [Ralstonia solanacear	-7
332		gi|17547018|ref|NP_520420.1| signal peptide protein [Ralstonia solanacearum GMI	-7
333		gi|17547030|ref|NP_520432.1| two-component sensor histidine kinase transcriptio	-7
334		gi|17547045|ref|NP_520447.1| lipoprotein [Ralstonia solanacearum GMI1000]	-7
335		gi|17547076|ref|NP_520478.1| porphobilinogen deaminase [Ralstonia solanacearum	-7
336		gi|17547083|ref|NP_520485.1| hypothetical protein RSc2364 [Ralstonia solanacear	-7
337		gi|17547127|ref|NP_520529.1| isrso11-transposase orfb protein [Ralstonia solana	-7
338		gi|17547141|ref|NP_520543.1| sulfate adenylyltransferase subunit 2 [Ralstonia s	-7
339		gi|17547191|ref|NP_520593.1| transmembrane protein [Ralstonia solanacearum GMI1	-7
340		gi|17547335|ref|NP_520737.1| hypothetical protein RSc2616 [Ralstonia solanacear	-7
341		gi|17547422|ref|NP_520824.1| hypothetical protein RSc2703 [Ralstonia solanacear	-7
342		gi|17547424|ref|NP_520826.1| hypothetical protein RSc2705 [Ralstonia solanacear	-7
343		gi|17547440|ref|NP_520842.1| glutathione S-transferase [Ralstonia solanacearum	-7
344		gi|17547472|ref|NP_520874.1| short chain dehydrogenase [Ralstonia solanacearum	-7
345		gi|17547519|ref|NP_520921.1| hypothetical protein RSc2800 [Ralstonia solanacear	-7
346		gi|17547667|ref|NP_521069.1| imidazole glycerol phosphate synthase subunit HisH	-7
347		gi|17547808|ref|NP_521210.1| isrso11-transposase orfb protein [Ralstonia solana	-7
348		gi|17547834|ref|NP_521236.1| general secretion pathway protein E [Ralstonia sol	-7
349		gi|17547867|ref|NP_521269.1| hypothetical protein RSc3148 [Ralstonia solanacear	-7
350		gi|17547930|ref|NP_521332.1| hypothetical protein RSc3211 [Ralstonia solanacear	-7
351		gi|17548001|ref|NP_521403.1| coproporphyrinogen III oxidase [Ralstonia solanace	-7
352		gi|17548136|ref|NP_521538.1| hypothetical protein RSc3419 [Ralstonia solanacear	-7
353		gi|17548286|ref|NP_521626.1| formyltetrahydrofolate deformylase [Ralstonia sola	-7
354		gi|17548339|ref|NP_521679.1| hypothetical protein RS03004 [Ralstonia solanacear	-7
355		gi|17548425|ref|NP_521765.1| hypothetical protein RS05224 [Ralstonia solanacear	-7
356		gi|17548426|ref|NP_521766.1| hypothetical protein RS05223 [Ralstonia solanacear	-7
357		gi|17548482|ref|NP_521822.1| putative transmembrane protein [Ralstonia solanace	-7
358	extracellular flagellum component	gi|17548566|ref|NP_521906.1| flagellar hook protein FlgE [Ralstonia solanacearu	-7
359		gi|17548616|ref|NP_521956.1| flagellar hook-length control protein [Ralstonia s	-7
360		gi|17548622|ref|NP_521962.1| lipoprotein [Ralstonia solanacearum GMI1000]	-7
361		gi|17548675|ref|NP_522015.1| rhs-related protein [Ralstonia solanacearum GMI100	-7
362		gi|17548705|ref|NP_522045.1| hypothetical protein RS00362 [Ralstonia solanacear	-7
363		gi|17548771|ref|NP_522111.1| activation/secretion signal peptide protein [Ralst	-7
364		gi|17548842|ref|NP_522182.1| precorrin-2 C20-methyltransferase protein [Ralston	-7
365		gi|17548888|ref|NP_522228.1| putative CYNX-related transport transmembrane prot	-7
366	RSp0672 (GALA2)	gi|17548893|ref|NP_522233.1| GALA protein [Ralstonia solanacearum GMI1000]	-7
367		gi|17548994|ref|NP_522334.1| putative signal peptide protein [Ralstonia solanac	-7
368		gi|17549041|ref|NP_522381.1| putative hemagglutinin-related protein [Ralstonia	-7
369	RSp0839	gi|17549060|ref|NP_522400.1| hypothetical protein RS05562 [Ralstonia solanacear	-7
370		gi|17549063|ref|NP_522403.1| leucine-rich-repeat protein [Ralstonia solanacearu	-7
371	RSp0854	gi|17549075|ref|NP_522415.1| HRPY-like protein [Ralstonia solanacearum GMI1000]	-7
372	PopA	gi|17549098|ref|NP_522438.1| POPA protein [Ralstonia solanacearum GMI1000]	-7
373		gi|17549099|ref|NP_522439.1| outer membrane receptor PRHA signal peptide protei	-7
374		gi|17549101|ref|NP_522441.1| polygalacturonase precursor (pectinase) signal pep	-7
375		gi|17549137|ref|NP_522477.1| lipoprotein [Ralstonia solanacearum GMI1000]	-7
376		gi|17549166|ref|NP_522506.1| 2-hydroxyacid dehydrogenase [Ralstonia solanacearu	-7
377		gi|17549205|ref|NP_522545.1| putative thiamine-phosphate pyrophosphorylase prot	-7
378	RSp1031	gi|17549252|ref|NP_522592.1| hypothetical protein RS02368 [Ralstonia solanacear	-7
379		gi|17549341|ref|NP_522681.1| hypothetical protein RS05499 [Ralstonia solanacear	-7
380		gi|17549505|ref|NP_522845.1| putative DNA-binding sucrose operon transcriptiona	-7
381	RSp1388	gi|17549607|ref|NP_522947.1| hypothetical protein RS02070 [Ralstonia solanacear	-7
382		gi|17549686|ref|NP_523026.1| putative transmembrane protein [Ralstonia solanace	-7
383		gi|17549696|ref|NP_523036.1| signal peptide protein [Ralstonia solanacearum GMI	-7
384		gi|17549712|ref|NP_523052.1| hypothetical protein RS05842 [Ralstonia solanacear	-7
385		gi|17549800|ref|NP_523140.1| catalase hydroperoxidase HpiI oxidoreductase [Rals	-7
386		gi|17549822|ref|NP_523162.1| hypothetical protein RS02160 [Ralstonia solanacear	-7
387		gi|17549839|ref|NP_523179.1| putative hemagglutinin-related protein [Ralstonia	-7
388		gi|17545050|ref|NP_518452.1| C4-dicarboxylate transport sensor kinase transcrip	-6
389		gi|17545144|ref|NP_518546.1| hypothetical protein RSc0425 [Ralstonia solanacear	-6
390		gi|17545147|ref|NP_518549.1| hypothetical protein RSc0428 [Ralstonia solanacear	-6
391		gi|17545248|ref|NP_518650.1| metalloprotease [Ralstonia solanacearum GMI1000]	-6
392		gi|17545392|ref|NP_518794.1| hypothetical protein RSc0673 [Ralstonia solanacear	-6
393		gi|17545510|ref|NP_518912.1| glutaminyl-tRNA synthetase [Ralstonia solanacearum	-6
394		gi|17545517|ref|NP_518919.1| purine nucleoside permease [Ralstonia solanacearum	-6
395		gi|17545675|ref|NP_519077.1| hypothetical protein RSc0956 [Ralstonia solanacear	-6
396		gi|17545858|ref|NP_519260.1| thioredoxin reductase oxidoreductase [Ralstonia so	-6
397		gi|17545871|ref|NP_519273.1| transcription regulator protein [Ralstonia solanac	-6
398		gi|17545880|ref|NP_519282.1| tRNA/rRNA methyltransferase [Ralstonia solanacearu	-6
399		gi|17546009|ref|NP_519411.1| ribosome-binding factor A [Ralstonia solanacearum	-6
400		gi|17546145|ref|NP_519547.1| hypothetical protein RSc1426 [Ralstonia solanacear	-6
401		gi|17546494|ref|NP_519896.1| hemagglutinin-related protein [Ralstonia solanacea	-6
402		gi|17546655|ref|NP_520057.1| bacteriophage protein [Ralstonia solanacearum GMI1	-6
403		gi|17547109|ref|NP_520511.1| cobyric acid synthase [Ralstonia solanacearum GMI1	-6
404		gi|17547126|ref|NP_520528.1| hypothetical protein RSc2407 [Ralstonia solanacear	-6
405		gi|17547446|ref|NP_520848.1| multidrug resistance transmembrane protein [Ralsto	-6
406		gi|17547486|ref|NP_520888.1| malic enzyme [Ralstonia solanacearum GMI1000]	-6
407		gi|17547957|ref|NP_521359.1| hypothetical protein RSc3238 [Ralstonia solanacear	-6
408		gi|17548072|ref|NP_521474.1| phenylalanine 4-monooxygenase [Ralstonia solanacea	-6
409		gi|17548727|ref|NP_522067.1| putative glycin-rich transmembrane protein [Ralsto	-6
410		gi|17549082|ref|NP_522422.1| Hrp conserved protein HRCQ [Ralstonia solanacearum	-6
411		gi|17549240|ref|NP_522580.1| low molecular weight protein-tyrosine-phosphatase	-6
412		gi|17549358|ref|NP_522698.1| putative RHS-related transmembrane protein [Ralsto	-6
413	RSp1236	gi|17549457|ref|NP_522797.1| hypothetical protein RS03180 [Ralstonia solanacear	-6
414		gi|17549583|ref|NP_522923.1| alpha-ketoglutarate decarboxylase [Ralstonia solan	-6
415		gi|17549741|ref|NP_523081.1| hypothetical protein RS04799 [Ralstonia solanacear	-6
416		gi|17544767|ref|NP_518169.1| transcription regulator protein [Ralstonia solanac	-5
417		gi|17544775|ref|NP_518177.1| lipoprotein [Ralstonia solanacearum GMI1000]	-5
418		gi|17544783|ref|NP_518185.1| long-chain-fatty-acid--CoA ligase [Ralstonia solan	-5
419		gi|17544787|ref|NP_518189.1| SMF protein [Ralstonia solanacearum GMI1000]	-5
420		gi|17544805|ref|NP_518207.1| hypothetical protein RSc0086 [Ralstonia solanacear	-5
421		gi|17544814|ref|NP_518216.1| hypothetical protein RSc0095 [Ralstonia solanacear	-5
422		gi|17544821|ref|NP_518223.1| calcium binding hemolysin protein [Ralstonia solan	-5
423		gi|17544838|ref|NP_518240.1| hypothetical protein RSc0119 [Ralstonia solanacear	-5
424		gi|17544909|ref|NP_518311.1| transcription regulator protein [Ralstonia solanac	-5
425		gi|17544968|ref|NP_518370.1| calcium binding hemolysin protein [Ralstonia solan	-5
426		gi|17544969|ref|NP_518371.1| hypothetical protein RSc0250 [Ralstonia solanacear	-5
427		gi|17544985|ref|NP_518387.1| biotin synthase [Ralstonia solanacearum GMI1000]	-5
428		gi|17545038|ref|NP_518440.1| non-hemolytic phospholipase C signal peptide prote	-5
429		gi|17545039|ref|NP_518441.1| hypothetical protein RSc0320 [Ralstonia solanacear	-5
430		gi|17545064|ref|NP_518466.1| glutathione synthetase [Ralstonia solanacearum GMI	-5
431		gi|17545105|ref|NP_518507.1| cell division protein [Ralstonia solanacearum GMI1	-5
432		gi|17545136|ref|NP_518538.1| adenine phosphoribosyltransferase [Ralstonia solan	-5
433		gi|17545146|ref|NP_518548.1| 3-oxoacyl-(acyl carrier protein) synthase I [Ralst	-5
434		gi|17545161|ref|NP_518563.1| acyl-CoA synthetase [Ralstonia solanacearum GMI100	-5
435		gi|17545236|ref|NP_518638.1| 4-hydroxythreonine-4-phosphate dehydrogenase [Rals	-5
436		gi|17545314|ref|NP_518716.1| outer membrane receptor signal peptide protein [Ra	-5
437		gi|17545315|ref|NP_518717.1| hypothetical protein RSc0596 [Ralstonia solanacear	-5
438		gi|17545387|ref|NP_518789.1| twitching motility two-component response regulato	-5
439		gi|17545403|ref|NP_518805.1| glucose-1-phosphate thymidylyltransferase [Ralston	-5
440		gi|17545425|ref|NP_518827.1| hypothetical protein RSc0706 [Ralstonia solanacear	-5
441		gi|17545436|ref|NP_518838.1| type-4 frimbrial pilin-related signal peptide prot	-5
442		gi|17545487|ref|NP_518889.1| hypothetical protein RSc0768 [Ralstonia solanacear	-5
443		gi|17545489|ref|NP_518891.1| transmembrane dehydrogenase (small subunit) oxidor	-5
444		gi|17545538|ref|NP_518940.1| hypothetical protein RSc0819 [Ralstonia solanacear	-5
445		gi|17545589|ref|NP_518991.1| cytosine-specific methyltransferase [Ralstonia sol	-5
446		gi|17545681|ref|NP_519083.1| bacteriophage DNA-binding transcription regulator	-5
447		gi|17545738|ref|NP_519140.1| pyridoxal-phosphate-dependent aminotransferase (NI	-5
448		gi|17545850|ref|NP_519252.1| hypothetical protein RSc1131 [Ralstonia solanacear	-5
449		gi|17545865|ref|NP_519267.1| hypothetical protein RSc1146 [Ralstonia solanacear	-5
450		gi|17545914|ref|NP_519316.1| hypothetical protein RSc1195 [Ralstonia solanacear	-5
451		gi|17545959|ref|NP_519361.1| transferase kinase [Ralstonia solanacearum GMI1000	-5
452		gi|17545967|ref|NP_519369.1| hypothetical protein RSc1248 [Ralstonia solanacear	-5
453		gi|17546011|ref|NP_519413.1| multidrug resistance B (translocase) transmembrane	-5
454		gi|17546025|ref|NP_519427.1| L-asparaginase II precursor signal peptide protein	-5
455		gi|17546041|ref|NP_519443.1| aminotransferase [Ralstonia solanacearum GMI1000]	-5
456		gi|17546161|ref|NP_519563.1| protocatechuate 3,4-dioxygenase alpha chain oxidor	-5
457		gi|17546272|ref|NP_519674.1| hypothetical protein RSc1553 [Ralstonia solanacear	-5
458		gi|17546298|ref|NP_519700.1| 50S ribosomal protein L35 [Ralstonia solanacearum	-5
459		gi|17546308|ref|NP_519710.1| hypothetical protein RSc1589 [Ralstonia solanacear	-5
460		gi|17546348|ref|NP_519750.1| hypothetical protein RSc1629 [Ralstonia solanacear	-5
461		gi|17546375|ref|NP_519777.1| hypothetical protein RSc1656 [Ralstonia solanacear	-5
462		gi|17546412|ref|NP_519814.1| tail fiber assembly protein [Ralstonia solanacearu	-5
463		gi|17546429|ref|NP_519831.1| trigger factor [Ralstonia solanacearum GMI1000]	-5
464	RSc1815 (AvrBs3)	gi|17546534|ref|NP_519936.1| hypothetical protein RSc1815 [Ralstonia solanacear	-5
465		gi|17546661|ref|NP_520063.1| hypothetical protein RSc1942 [Ralstonia solanacear	-5
466		gi|17546685|ref|NP_520087.1| hemin uptake protein [Ralstonia solanacearum GMI10	-5
467		gi|17546719|ref|NP_520121.1| 2-methylisocitrate lyase [Ralstonia solanacearum G	-5
468		gi|17546737|ref|NP_520139.1| transcription regulator protein [Ralstonia solanac	-5
469		gi|17546747|ref|NP_520149.1| hypothetical protein RSc2028 [Ralstonia solanacear	-5
470		gi|17546752|ref|NP_520154.1| urease subunit beta [Ralstonia solanacearum GMI100	-5
471		gi|17546798|ref|NP_520200.1| hypothetical protein RSc2079 [Ralstonia solanacear	-5
472		gi|17546918|ref|NP_520320.1| hypothetical protein RSc2199 [Ralstonia solanacear	-5
473		gi|17546933|ref|NP_520335.1| hypothetical protein RSc2214 [Ralstonia solanacear	-5
474		gi|17546956|ref|NP_520358.1| UTP--glucose-1-phosphate uridylyltransferase [Rals	-5
475		gi|17546974|ref|NP_520376.1| transcription regulator protein [Ralstonia solanac	-5
476		gi|17546980|ref|NP_520382.1| amino-acid-binding periplasmic (PBP) ABC transport	-5
477		gi|17546999|ref|NP_520401.1| signal peptide protein [Ralstonia solanacearum GMI	-5
478		gi|17547011|ref|NP_520413.1| transmembrane protein [Ralstonia solanacearum GMI1	-5
479		gi|17547016|ref|NP_520418.1| signal peptide protein [Ralstonia solanacearum GMI	-5
480		gi|17547106|ref|NP_520508.1| pantoate--beta-alanine ligase [Ralstonia solanacea	-5
481		gi|17547173|ref|NP_520575.1| phosphoribosylglycinamide formyltransferase [Ralst	-5
482		gi|17547220|ref|NP_520622.1| gamma-glutamyltranspeptidase [Ralstonia solanacear	-5
483		gi|17547262|ref|NP_520664.1| methylated-DNA--protein-cysteine methyltransferase	-5
484		gi|17547274|ref|NP_520676.1| hypothetical protein RSc2555 [Ralstonia solanacear	-5
485		gi|17547295|ref|NP_520697.1| conjugal transfer lipoprotein TrbG [Ralstonia sola	-5
486		gi|17547347|ref|NP_520749.1| 2-amino-4-hydroxy-6-hydroxymethyldihydropteridine	-5
487		gi|17547402|ref|NP_520804.1| hypothetical protein RSc2683 [Ralstonia solanacear	-5
488		gi|17547416|ref|NP_520818.1| hypothetical protein RSc2697 [Ralstonia solanacear	-5
489		gi|17547492|ref|NP_520894.1| orotidine 5'-phosphate decarboxylase [Ralstonia so	-5
490		gi|17547561|ref|NP_520963.1| D-alanine--D-alanine ligase [Ralstonia solanacearu	-5
491		gi|17547628|ref|NP_521030.1| glucosyltransferase MdoH [Ralstonia solanacearum G	-5
492		gi|17547640|ref|NP_521042.1| gamma-glutamyltranspeptidase precursor [Ralstonia	-5
493		gi|17547772|ref|NP_521174.1| signal peptide protein [Ralstonia solanacearum GMI	-5
494		gi|17547784|ref|NP_521186.1| hypothetical protein RSc3065 [Ralstonia solanacear	-5
495		gi|17547801|ref|NP_521203.1| hypothetical protein RSc3082 [Ralstonia solanacear	-5
496		gi|17547823|ref|NP_521225.1| calcium binding signal peptide protein [Ralstonia	-5
497		gi|17547881|ref|NP_521283.1| hemagglutinin-related protein [Ralstonia solanacea	-5
498		gi|17547882|ref|NP_521284.1| TPR domain protein [Ralstonia solanacearum GMI1000	-5
499		gi|17547966|ref|NP_521368.1| signal peptide protein [Ralstonia solanacearum GMI	-5
500		gi|17547995|ref|NP_521397.1| hypothetical protein RSc3278 [Ralstonia solanacear	-5
501		gi|17548013|ref|NP_521415.1| L-serine dehydratase [Ralstonia solanacearum GMI10	-5
502		gi|17548019|ref|NP_521421.1| primosome assembly protein PriA [Ralstonia solanac	-5
503		gi|17548022|ref|NP_521424.1| hypothetical protein RSc3305 [Ralstonia solanacear	-5
504		gi|17548055|ref|NP_521457.1| hypothetical protein RSc3338 [Ralstonia solanacear	-5
505		gi|17548066|ref|NP_521468.1| hypothetical protein RSc3349 [Ralstonia solanacear	-5
506		gi|17548070|ref|NP_521472.1| hypothetical protein RSc3353 [Ralstonia solanacear	-5
507		gi|17548137|ref|NP_521539.1| hypothetical protein RSc3420 [Ralstonia solanacear	-5
508		gi|17548151|ref|NP_521553.1| hypothetical protein RSc3434 [Ralstonia solanacear	-5
509		gi|17548239|ref|NP_521579.1| transcriptional regulator transcription regulator	-5
510		gi|17548247|ref|NP_521587.1| hypothetical protein RS02001 [Ralstonia solanacear	-5
511		gi|17548303|ref|NP_521643.1| hypothetical protein RS05556 [Ralstonia solanacear	-5
512		gi|17548307|ref|NP_521647.1| putative RHS-related protein [Ralstonia solanacear	-5
513		gi|17548322|ref|NP_521662.1| hypothetical protein RS03022 [Ralstonia solanacear	-5
514		gi|17548345|ref|NP_521685.1| putative lipoprotein transmembrane [Ralstonia sola	-5
515		gi|17548368|ref|NP_521708.1| hypothetical protein RS02973 [Ralstonia solanacear	-5
516		gi|17548387|ref|NP_521727.1| adenylylsulfate kinase [Ralstonia solanacearum GMI	-5
517		gi|17548415|ref|NP_521755.1| 3-oxoacyl-(acyl carrier protein) synthase III [Ral	-5
518		gi|17548449|ref|NP_521789.1| putative phenol-degradative gene regulator transcr	-5
519		gi|17548459|ref|NP_521799.1| glycogen operon protein GlgX [Ralstonia solanacear	-5
520		gi|17548486|ref|NP_521826.1| acetyltransferase protein [Ralstonia solanacearum	-5
521		gi|17548526|ref|NP_521866.1| dehydrogenase oxidoreductase protein [Ralstonia so	-5
522		gi|17548527|ref|NP_521867.1| hypothetical protein RS05465 [Ralstonia solanacear	-5
523		gi|17548552|ref|NP_521892.1| putative transcription regulator protein [Ralstoni	-5
524		gi|17548564|ref|NP_521904.1| flagellar basal-body rod protein FlgC [Ralstonia s	-5
525		gi|17548567|ref|NP_521907.1| flagellar basal-body rod protein FlgF [Ralstonia s	-5
526		gi|17548677|ref|NP_522017.1| signal peptide protein [Ralstonia solanacearum GMI	-5
527		gi|17548697|ref|NP_522037.1| putative RHS-related transmembrane protein [Ralsto	-5
528		gi|17548736|ref|NP_522076.1| hypothetical protein RS00394 [Ralstonia solanacear	-5
529		gi|17548752|ref|NP_522092.1| P-II-like protein transcription regulator [Ralston	-5
530		gi|17548765|ref|NP_522105.1| hypothetical protein RS03936 [Ralstonia solanacear	-5
531		gi|17548966|ref|NP_522306.1| hypothetical protein RS01963 [Ralstonia solanacear	-5
532		gi|17549003|ref|NP_522343.1| putative aminoacyl-tRNA synthetase protein [Ralsto	-5
533		gi|17549024|ref|NP_522364.1| signal peptide protein [Ralstonia solanacearum GMI	-5
534	RSp0846	gi|17549067|ref|NP_522407.1| AWR family protein [Ralstonia solanacearum GMI1000	-5
535		gi|17549164|ref|NP_522504.1| aspartate aminotransferase [Ralstonia solanacearum	-5
536		gi|17549184|ref|NP_522524.1| anaerobic ribonucleoside triphosphate reductase [R	-5
537		gi|17549195|ref|NP_522535.1| respiratory nitrate reductase alpha chain oxidored	-5
538		gi|17549230|ref|NP_522570.1| glycosyltransferase [Ralstonia solanacearum GMI100	-5
539		gi|17549241|ref|NP_522581.1| EPS I polysaccharide export outer membrane transme	-5
540		gi|17549284|ref|NP_522624.1| signal peptide protein [Ralstonia solanacearum GMI	-5
541		gi|17549360|ref|NP_522700.1| Vgr-related protein [Ralstonia solanacearum GMI100	-5
542		gi|17549406|ref|NP_522746.1| D-serine deaminase [Ralstonia solanacearum GMI1000	-5
543		gi|17549413|ref|NP_522753.1| transcription regulator protein [Ralstonia solanac	-5
544		gi|17549456|ref|NP_522796.1| transcription regulator protein [Ralstonia solanac	-5
545	RSp1239	gi|17549460|ref|NP_522800.1| hypothetical protein RS03183 [Ralstonia solanacear	-5
546		gi|17549461|ref|NP_522801.1| putative transglycosylase protein [Ralstonia solan	-5
547		gi|17549540|ref|NP_522880.1| hypothetical protein RS05656 [Ralstonia solanacear	-5
548		gi|17549563|ref|NP_522903.1| hypothetical protein RS04773 [Ralstonia solanacear	-5
549		gi|17549571|ref|NP_522911.1| hypothetical protein RS04781 [Ralstonia solanacear	-5
550		gi|17549592|ref|NP_522932.1| NosL lipoprotein [Ralstonia solanacearum GMI1000]	-5
551		gi|17549601|ref|NP_522941.1| putative signal peptide protein [Ralstonia solanac	-5
552		gi|17549659|ref|NP_522999.1| hypothetical protein RS06034 [Ralstonia solanacear	-5
553		gi|17549674|ref|NP_523014.1| two-component response regulator transcription reg	-5
554		gi|17549698|ref|NP_523038.1| hypothetical protein RS03064 [Ralstonia solanacear	-5
555		gi|17549705|ref|NP_523045.1| hypothetical protein RS03057 [Ralstonia solanacear	-5
556		gi|17549716|ref|NP_523056.1| lipoprotein signal peptide [Ralstonia solanacearum	-5
557		gi|17549726|ref|NP_523066.1| ABC transporter ATP-binding protein [Ralstonia sol	-5
558		gi|17549806|ref|NP_523146.1| hypothetical protein RS02141 [Ralstonia solanacear	-5
559		gi|17549809|ref|NP_523149.1| hypothetical protein RS02147 [Ralstonia solanacear	-5
560		gi|17549815|ref|NP_523155.1| hypothetical protein RS02153 [Ralstonia solanacear	-5
561		gi|17549817|ref|NP_523157.1| putative transport transmembrane protein [Ralstoni	-5
562		gi|17549884|ref|NP_523224.1| hypothetical protein RS02224 [Ralstonia solanacear	-5
563		gi|17544743|ref|NP_518145.1| signal peptide protein [Ralstonia solanacearum GMI	-4
564		gi|17544899|ref|NP_518301.1| hypothetical protein RSc0180 [Ralstonia solanacear	-4
565		gi|17545091|ref|NP_518493.1| protoheme IX farnesyltransferase [Ralstonia solana	-4
566		gi|17545117|ref|NP_518519.1| hypothetical protein RSc0398 [Ralstonia solanacear	-4
567		gi|17545359|ref|NP_518761.1| hypothetical protein RSc0640 [Ralstonia solanacear	-4
568		gi|17545390|ref|NP_518792.1| twitching motility transmembrane protein [Ralstoni	-4
569		gi|17545472|ref|NP_518874.1| hypothetical protein RSc0753 [Ralstonia solanacear	-4
570		gi|17545537|ref|NP_518939.1| endoglucanase [Ralstonia solanacearum GMI1000]	-4
571		gi|17545563|ref|NP_518965.1| hypothetical protein RSc0844 [Ralstonia solanacear	-4
572		gi|17545595|ref|NP_518997.1| hypothetical protein RSc0876 [Ralstonia solanacear	-4
573		gi|17545712|ref|NP_519114.1| transcriptional regulatory DNA-binding transcripti	-4
574		gi|17545737|ref|NP_519139.1| hypothetical protein RSc1018 [Ralstonia solanacear	-4
575		gi|17545790|ref|NP_519192.1| excinuclease ABC subunit C [Ralstonia solanacearum	-4
576		gi|17545961|ref|NP_519363.1| sugar ATP-binding ABC transporter protein [Ralston	-4
577		gi|17546056|ref|NP_519458.1| NADPH-dependent FMN reductase oxidoreductase [Rals	-4
578		gi|17546120|ref|NP_519522.1| hypothetical protein RSc1401 [Ralstonia solanacear	-4
579		gi|17546320|ref|NP_519722.1| dihydrolipoamide acetyltransferase [Ralstonia sola	-4
580		gi|17546448|ref|NP_519850.1| transcription regulator protein [Ralstonia solanac	-4
581		gi|17546626|ref|NP_520028.1| DNA-binding repressor transcription regulator prot	-4
582		gi|17546693|ref|NP_520095.1| lipooligosaccharide transporter ATP-binding subuni	-4
583		gi|17546825|ref|NP_520227.1| amino-acid ATP-binding ABC transporter protein [Ra	-4
584		gi|17546884|ref|NP_520286.1| pyrrolidone-carboxylate peptidase [Ralstonia solan	-4
585		gi|17546930|ref|NP_520332.1| ATP-dependent RNA helicase [Ralstonia solanacearum	-4
586		gi|17546932|ref|NP_520334.1| transcription regulator transcription regulator pr	-4
587		gi|17546979|ref|NP_520381.1| amino-acid ATP-binding ABC transporter protein [Ra	-4
588		gi|17547299|ref|NP_520701.1| conjugal transfer TrbJ signal peptide protein [Ral	-4
589		gi|17547322|ref|NP_520724.1| hypothetical protein RSc2603 [Ralstonia solanacear	-4
590		gi|17547375|ref|NP_520777.1| glutamate-ammonia-ligase adenylyltransferase [Rals	-4
591		gi|17547418|ref|NP_520820.1| hypothetical protein RSc2699 [Ralstonia solanacear	-4
592		gi|17547449|ref|NP_520851.1| NAD(P) transhydrogenase alpha subunit [Ralstonia s	-4
593		gi|17547496|ref|NP_520898.1| shikimate 5-dehydrogenase [Ralstonia solanacearum	-4
594		gi|17547597|ref|NP_520999.1| ApaG [Ralstonia solanacearum GMI1000]	-4
595		gi|17547613|ref|NP_521015.1| hypothetical protein RSc2894 [Ralstonia solanacear	-4
596		gi|17547639|ref|NP_521041.1| hydroxamate-type ferrisiderophore receptor signal	-4
597		gi|17547698|ref|NP_521100.1| diaminopimelate decarboxylase [Ralstonia solanacea	-4
598		gi|17547734|ref|NP_521136.1| 30S ribosomal protein S19 [Ralstonia solanacearum	-4
599		gi|17547735|ref|NP_521137.1| 50S ribosomal protein L2 [Ralstonia solanacearum G	-4
600		gi|17547796|ref|NP_521198.1| hypothetical protein RSc3077 [Ralstonia solanacear	-4
601		gi|17547916|ref|NP_521318.1| hypothetical protein RSc3197 [Ralstonia solanacear	-4
602		gi|17547920|ref|NP_521322.1| oxidoreductase [Ralstonia solanacearum GMI1000]	-4
603		gi|17548005|ref|NP_521407.1| hypothetical protein RSc3288 [Ralstonia solanacear	-4
604		gi|17548046|ref|NP_521448.1| amino-acid-binding periplasmic (PBP) ABC transport	-4
605		gi|17548146|ref|NP_521548.1| hypothetical protein RSc3429 [Ralstonia solanacear	-4
606		gi|17548153|ref|NP_521555.1| hypothetical protein RSc3436 [Ralstonia solanacear	-4
607		gi|17548156|ref|NP_521558.1| patch repair protein [Ralstonia solanacearum GMI10	-4
608		gi|17548281|ref|NP_521621.1| putative electron transfer flavoprotein alpha-subu	-4
609		gi|17548382|ref|NP_521722.1| putative transmembrane protein [Ralstonia solanace	-4
610		gi|17548402|ref|NP_521742.1| hypothetical protein RS04693 [Ralstonia solanacear	-4
611		gi|17548447|ref|NP_521787.1| vanillin dehydrogenase oxidoreductase protein [Ral	-4
612		gi|17548453|ref|NP_521793.1| esterase/lipase protein [Ralstonia solanacearum GM	-4
613		gi|17548496|ref|NP_521836.1| hydrolase transmembrane protein [Ralstonia solanac	-4
614		gi|17548515|ref|NP_521855.1| putative hemolysin-type calcium-binding protein [R	-4
615		gi|17548680|ref|NP_522020.1| putative RHS-related protein [Ralstonia solanacear	-4
616		gi|17548731|ref|NP_522071.1| UDP-N-acetylglucosamine 2-epimerase protein [Ralst	-4
617		gi|17549057|ref|NP_522397.1| putative nicotinate phosphoribosyltransferase [Ral	-4
618		gi|17549185|ref|NP_522525.1| hypothetical protein RS02295 [Ralstonia solanacear	-4
619		gi|17549251|ref|NP_522591.1| hypothetical protein RS02367 [Ralstonia solanacear	-4
620		gi|17549397|ref|NP_522737.1| hypothetical protein RS05066 [Ralstonia solanacear	-4
621		gi|17549449|ref|NP_522789.1| putative signal peptide protein [Ralstonia solanac	-4
622		gi|17549587|ref|NP_522927.1| nitrous-oxide reductase [Ralstonia solanacearum GM	-4
623		gi|17549863|ref|NP_523203.1| transcription regulator transcription regulator pr	-4
624		gi|17544729|ref|NP_518131.1| acriflavin resistance transmembrane protein [Ralst	-3
625		gi|17544802|ref|NP_518204.1| hypothetical protein RSc0083 [Ralstonia solanacear	-3
626		gi|161621735|ref|NP_518206.2| multifunctional tRNA nucleotidyl transferase/2'3'	-3
627		gi|17544819|ref|NP_518221.1| bifunctional hydroxy-phosphomethylpyrimidine kinas	-3
628		gi|17544880|ref|NP_518282.1| transmembrane aldehyde dehydrogenase oxidoreductas	-3
629		gi|17544882|ref|NP_518284.1| lipoprotein [Ralstonia solanacearum GMI1000]	-3
630		gi|17544951|ref|NP_518353.1| hypothetical protein RSc0232 [Ralstonia solanacear	-3
631		gi|17544952|ref|NP_518354.1| integral membrane transmembrane protein [Ralstonia	-3
632		gi|17545018|ref|NP_518420.1| prolin-rich signal peptide protein [Ralstonia sola	-3
633		gi|17545033|ref|NP_518435.1| ABC transporter ATP-binding protein [Ralstonia sol	-3
634		gi|17545046|ref|NP_518448.1| penicillin-binding transmembrane protein [Ralstoni	-3
635		gi|17545093|ref|NP_518495.1| RNA polymerase factor sigma-32 [Ralstonia solanace	-3
636		gi|17545096|ref|NP_518498.1| pirin-like protein [Ralstonia solanacearum GMI1000	-3
637		gi|17545137|ref|NP_518539.1| transport transmembrane protein [Ralstonia solanac	-3
638		gi|17545152|ref|NP_518554.1| hypothetical protein RSc0433 [Ralstonia solanacear	-3
639		gi|17545235|ref|NP_518637.1| peptidyl-prolyl cis-trans isomerase [Ralstonia sol	-3
640		gi|17545264|ref|NP_518666.1| oxidoreductase [Ralstonia solanacearum GMI1000]	-3
641		gi|17545318|ref|NP_518720.1| transcription regulator protein [Ralstonia solanac	-3
642		gi|17545335|ref|NP_518737.1| hypothetical protein RSc0616 [Ralstonia solanacear	-3
643		gi|17545462|ref|NP_518864.1| phospho-2-dehydro-3-deoxyheptonate aldolase [Ralst	-3
644		gi|17545524|ref|NP_518926.1| hypothetical protein RSc0805 [Ralstonia solanacear	-3
645		gi|17545551|ref|NP_518953.1| hypothetical protein RSc0832 [Ralstonia solanacear	-3
646		gi|17545608|ref|NP_519010.1| hypothetical protein RSc0889 [Ralstonia solanacear	-3
647		gi|17545622|ref|NP_519024.1| phosphoserine aminotransferase [Ralstonia solanace	-3
648		gi|17545711|ref|NP_519113.1| glutathione S-transferase-like transmembrane prote	-3
649		gi|17545730|ref|NP_519132.1| excinuclease ABC subunit B [Ralstonia solanacearum	-3
650		gi|17545747|ref|NP_519149.1| lysyl-tRNA synthetase [Ralstonia solanacearum GMI1	-3
651		gi|17545753|ref|NP_519155.1| 2-hydroxyacid dehydrogenase [Ralstonia solanacearu	-3
652		gi|17545756|ref|NP_519158.1| molybdopterin biosynthesis MOEA protein [Ralstonia	-3
653		gi|17545801|ref|NP_519203.1| porin transmembrane protein [Ralstonia solanacearu	-3
654		gi|17545827|ref|NP_519229.1| transcriptional regulatory DNA-binding transcripti	-3
655		gi|17545842|ref|NP_519244.1| hypothetical protein RSc1123 [Ralstonia solanacear	-3
656		gi|17545857|ref|NP_519259.1| transmembrane protein [Ralstonia solanacearum GMI1	-3
657		gi|17545884|ref|NP_519286.1| peptidyl-prolyl cis-trans isomerase A [Ralstonia s	-3
658		gi|17545894|ref|NP_519296.1| transmembrane ABC transporter protein [Ralstonia s	-3
659		gi|17545913|ref|NP_519315.1| recombination protein RecR [Ralstonia solanacearum	-3
660		gi|17545918|ref|NP_519320.1| ABC transporter ATP-binding protein [Ralstonia sol	-3
661		gi|17545927|ref|NP_519329.1| hypothetical protein RSc1208 [Ralstonia solanacear	-3
662		gi|17545932|ref|NP_519334.1| type 4 fimbrial biogenesis protein [Ralstonia sola	-3
663		gi|17545941|ref|NP_519343.1| hypothetical protein RSc1222 [Ralstonia solanacear	-3
664		gi|17545947|ref|NP_519349.1| exoribonuclease RNase R [Ralstonia solanacearum GM	-3
665		gi|17545955|ref|NP_519357.1| outer membrane porin lipoprotein transmembrane [Ra	-3
666		gi|17545971|ref|NP_519373.1| signal peptide protein [Ralstonia solanacearum GMI	-3
667		gi|17546035|ref|NP_519437.1| hypothetical protein RSc1316 [Ralstonia solanacear	-3
668		gi|17546102|ref|NP_519504.1| D-aminopeptidase [Ralstonia solanacearum GMI1000]	-3
669		gi|17546135|ref|NP_519537.1| UDP-N-acetylglucosamine acyltransferase [Ralstonia	-3
670		gi|17546160|ref|NP_519562.1| protocatechuate 3,4-dioxygenase subunit beta oxido	-3
671		gi|17546175|ref|NP_519577.1| betaine aldehyde dehydrogenase (BADH) oxidoreducta	-3
672		gi|17546176|ref|NP_519578.1| hypothetical protein RSc1457 [Ralstonia solanacear	-3
673		gi|17546248|ref|NP_519650.1| phosphate ABC transporter phosphate-binding protei	-3
674		gi|17546257|ref|NP_519659.1| hypothetical protein RSc1538 [Ralstonia solanacear	-3
675		gi|17546265|ref|NP_519667.1| hypothetical protein RSc1546 [Ralstonia solanacear	-3
676		gi|17546267|ref|NP_519669.1| transposase [Ralstonia solanacearum GMI1000]	-3
677		gi|17546296|ref|NP_519698.1| threonyl-tRNA synthetase [Ralstonia solanacearum G	-3
678		gi|17546301|ref|NP_519703.1| phenylalanyl-tRNA synthetase subunit beta [Ralston	-3
679		gi|17546316|ref|NP_519718.1| response regulator transcription regulator protein	-3
680		gi|17546336|ref|NP_519738.1| leucyl/phenylalanyl-tRNA--protein transferase [Ral	-3
681		gi|17546362|ref|NP_519764.1| 2-C-methyl-D-erythritol 4-phosphate cytidylyltrans	-3
682		gi|17546449|ref|NP_519851.1| dehydrogenase/reductase oxidoreductase [Ralstonia	-3
683		gi|17546515|ref|NP_519917.1| N-acetylmuramoyl-L-alanine amidase [Ralstonia sola	-3
684		gi|17546541|ref|NP_519943.1| maleate cis-trans isomerase [Ralstonia solanacearu	-3
685		gi|17546556|ref|NP_519958.1| oxygenase subunit protein [Ralstonia solanacearum	-3
686		gi|17546573|ref|NP_519975.1| outer membrane multidrug resistance lipoprotein [R	-3
687		gi|17546585|ref|NP_519987.1| hypothetical protein RSc1866 [Ralstonia solanacear	-3
688		gi|17546586|ref|NP_519988.1| hypothetical protein RSc1867 [Ralstonia solanacear	-3
689		gi|17546593|ref|NP_519995.1| hypothetical protein RSc1874 [Ralstonia solanacear	-3
690		gi|17546643|ref|NP_520045.1| phage baseplate assembly-like protein [Ralstonia s	-3
691		gi|17546713|ref|NP_520115.1| succinate dehydrogenase flavoprotein subunit [Rals	-3
692		gi|17546728|ref|NP_520130.1| hypothetical protein RSc2009 [Ralstonia solanacear	-3
693		gi|17546843|ref|NP_520245.1| lipoprotein transmembrane [Ralstonia solanacearum	-3
694		gi|17546903|ref|NP_520305.1| NADPH:quinone reductase, zeta-crystallin homolog o	-3
695		gi|17546917|ref|NP_520319.1| hypothetical protein RSc2198 [Ralstonia solanacear	-3
696		gi|17546919|ref|NP_520321.1| ABC transporter ATP-binding protein [Ralstonia sol	-3
697		gi|17546942|ref|NP_520344.1| exodeoxyribonuclease VII small subunit [Ralstonia	-3
698		gi|17546975|ref|NP_520377.1| signal peptide protein [Ralstonia solanacearum GMI	-3
699		gi|17546983|ref|NP_520385.1| lipoprotein [Ralstonia solanacearum GMI1000]	-3
700		gi|17547028|ref|NP_520430.1| GSPF-related transmembrane protein [Ralstonia sola	-3
701		gi|17547035|ref|NP_520437.1| drug transport transmembrane protein [Ralstonia so	-3
702		gi|17547058|ref|NP_520460.1| lipoprotein transmembrane [Ralstonia solanacearum	-3
703		gi|17547063|ref|NP_520465.1| hypothetical protein RSc2344 [Ralstonia solanacear	-3
704		gi|17547064|ref|NP_520466.1| nitrogen regulatory P-II transcription regulator p	-3
705		gi|17547069|ref|NP_520471.1| aldehyde dehydrogenase [Ralstonia solanacearum GMI	-3
706		gi|17547089|ref|NP_520491.1| hypothetical protein RSc2370 [Ralstonia solanacear	-3
707		gi|17547093|ref|NP_520495.1| transmembrane protein [Ralstonia solanacearum GMI1	-3
708		gi|17547097|ref|NP_520499.1| hypothetical protein RSc2378 [Ralstonia solanacear	-3
709		gi|17547146|ref|NP_520548.1| CysB family transcriptional regulator [Ralstonia s	-3
710		gi|17547176|ref|NP_520578.1| bifunctional riboflavin kinase/FMN adenylyltransfe	-3
711		gi|17547177|ref|NP_520579.1| isoleucyl-tRNA synthetase [Ralstonia solanacearum	-3
712		gi|17547210|ref|NP_520612.1| signal peptide protein [Ralstonia solanacearum GMI	-3
713		gi|17547212|ref|NP_520614.1| signal peptide protein [Ralstonia solanacearum GMI	-3
714		gi|17547251|ref|NP_520653.1| 3-deoxy-manno-octulosonate cytidylyltransferase [R	-3
715		gi|17547315|ref|NP_520717.1| hypothetical protein RSc2596 [Ralstonia solanacear	-3
716		gi|17547319|ref|NP_520721.1| hypothetical protein RSc2600 [Ralstonia solanacear	-3
717		gi|17547321|ref|NP_520723.1| conjugal transfer TraF transmembrane protein [Rals	-3
718		gi|17547354|ref|NP_520756.1| molecular chaperone DnaK [Ralstonia solanacearum G	-3
719		gi|17547359|ref|NP_520761.1| transposase [Ralstonia solanacearum GMI1000]	-3
720		gi|17547390|ref|NP_520792.1| hypothetical protein RSc2671 [Ralstonia solanacear	-3
721		gi|17547403|ref|NP_520805.1| pyrroline-5-carboxylate reductase [Ralstonia solan	-3
722		gi|17547414|ref|NP_520816.1| signal peptide protein [Ralstonia solanacearum GMI	-3
723		gi|17547415|ref|NP_520817.1| signal peptide protein [Ralstonia solanacearum GMI	-3
724		gi|17547464|ref|NP_520866.1| dihydrodipicolinate reductase oxidoreductase [Rals	-3
725		gi|17547520|ref|NP_520922.1| transcription regulator protein [Ralstonia solanac	-3
726		gi|17547524|ref|NP_520926.1| ribonucleotide-diphosphate reductase subunit alpha	-3
727		gi|17547535|ref|NP_520937.1| prolyl-tRNA synthetase [Ralstonia solanacearum GMI	-3
728		gi|17547536|ref|NP_520938.1| dinucleoside polyphosphate hydrolase [Ralstonia so	-3
729		gi|17547540|ref|NP_520942.1| 50S ribosomal protein L27 [Ralstonia solanacearum	-3
730		gi|17547595|ref|NP_520997.1| membrane-bound lytic murein transglycosylase A tra	-3
731		gi|17547619|ref|NP_521021.1| glutamyl-tRNA reductase [Ralstonia solanacearum GM	-3
732		gi|17547694|ref|NP_521096.1| fimbrial type-4 assembly protein [Ralstonia solana	-3
733		gi|17547715|ref|NP_521117.1| 30S ribosomal protein S13 [Ralstonia solanacearum	-3
734		gi|17547756|ref|NP_521158.1| 50S ribosomal protein L1 [Ralstonia solanacearum G	-3
735		gi|17547757|ref|NP_521159.1| 50S ribosomal protein L11 [Ralstonia solanacearum	-3
736		gi|17547804|ref|NP_521206.1| hypothetical protein RSc3085 [Ralstonia solanacear	-3
737		gi|17547812|ref|NP_521214.1| glutamate carboxypeptidase [Ralstonia solanacearum	-3
738		gi|17547820|ref|NP_521222.1| serine protease [Ralstonia solanacearum GMI1000]	-3
739		gi|17547847|ref|NP_521249.1| NAD+ dependent acetaldehyde dehydrogenase oxidored	-3
740		gi|17547856|ref|NP_521258.1| hypothetical protein RSc3137 [Ralstonia solanacear	-3
741		gi|17547869|ref|NP_521271.1| transmembrane protein [Ralstonia solanacearum GMI1	-3
742		gi|17547870|ref|NP_521272.1| tryptophan 2-monooxygenase oxidoreductase [Ralston	-3
743	RSc3174	gi|17547893|ref|NP_521295.1| hypothetical protein RSc3174 [Ralstonia solanacear	-3
744		gi|17547950|ref|NP_521352.1| hypothetical protein RSc3231 [Ralstonia solanacear	-3
745		gi|17547954|ref|NP_521356.1| hypothetical protein RSc3235 [Ralstonia solanacear	-3
746		gi|17548036|ref|NP_521438.1| F0F1 ATP synthase subunit alpha [Ralstonia solanac	-3
747		gi|17548067|ref|NP_521469.1| outer membrane W signal peptide protein [Ralstonia	-3
748		gi|17548077|ref|NP_521479.1| hypothetical protein RSc3360 [Ralstonia solanacear	-3
749		gi|17548094|ref|NP_521496.1| hypothetical protein RSc3377 [Ralstonia solanacear	-3
750		gi|17548228|ref|NP_521568.1| putative alpha-ketoglutarate permease transmembran	-3
751		gi|17548248|ref|NP_521588.1| putative manganese transport transmembrane protein	-3
752		gi|17548276|ref|NP_521616.1| serine hydroxymethyltransferase [Ralstonia solanac	-3
753		gi|17548319|ref|NP_521659.1| hypothetical protein RS05528 [Ralstonia solanacear	-3
754		gi|17548341|ref|NP_521681.1| aconitate hydratase [Ralstonia solanacearum GMI100	-3
755		gi|17548390|ref|NP_521730.1| putative transmembrane protein [Ralstonia solanace	-3
756		gi|17548394|ref|NP_521734.1| putative NIFS-like protein [Ralstonia solanacearum	-3
757		gi|17548473|ref|NP_521813.1| hypothetical protein RS03714 [Ralstonia solanacear	-3
758		gi|17548492|ref|NP_521832.1| hypothetical protein RS03693 [Ralstonia solanacear	-3
759		gi|17548500|ref|NP_521840.1| signal peptide protein [Ralstonia solanacearum GMI	-3
760		gi|17548598|ref|NP_521938.1| flagellar motor switch protein FliN [Ralstonia sol	-3
761		gi|17548649|ref|NP_521989.1| putative pseudogene protein [Ralstonia solanacearu	-3
762		gi|17548668|ref|NP_522008.1| transcription regulator protein [Ralstonia solanac	-3
763		gi|17548687|ref|NP_522027.1| hypothetical protein RS00954 [Ralstonia solanacear	-3
764		gi|17548730|ref|NP_522070.1| putative signal peptide protein [Ralstonia solanac	-3
765		gi|17548756|ref|NP_522096.1| transcription regulator protein [Ralstonia solanac	-3
766		gi|17548757|ref|NP_522097.1| sugar-proton symporter transmembrane protein [Rals	-3
767		gi|17548780|ref|NP_522120.1| putative transmembrane protein [Ralstonia solanace	-3
768		gi|17548785|ref|NP_522125.1| putative lipoprotein [Ralstonia solanacearum GMI10	-3
769		gi|17548816|ref|NP_522156.1| hypothetical protein RS03884 [Ralstonia solanacear	-3
770		gi|17548853|ref|NP_522193.1| hypothetical protein RS03735 [Ralstonia solanacear	-3
771		gi|17548870|ref|NP_522210.1| 3-hydroxyisobutyrate dehydrogenase oxidoreductase	-3
772		gi|17548874|ref|NP_522214.1| transcription regulator protein [Ralstonia solanac	-3
773		gi|17548906|ref|NP_522246.1| hypothetical protein RS01764 [Ralstonia solanacear	-3
774		gi|17548916|ref|NP_522256.1| putative signal peptide protein [Ralstonia solanac	-3
775		gi|17548956|ref|NP_522296.1| hypothetical protein RS01974 [Ralstonia solanacear	-3
776		gi|17548965|ref|NP_522305.1| hypothetical protein RS01964 [Ralstonia solanacear	-3
777		gi|17548999|ref|NP_522339.1| transcriptional activator of quorum sensing autoin	-3
778		gi|17549022|ref|NP_522362.1| hypothetical protein RS01906 [Ralstonia solanacear	-3
779		gi|17549072|ref|NP_522412.1| transcription regulator PRHJ transcription regulat	-3
780		gi|17549073|ref|NP_522413.1| response regulator transcription regulator protein	-3
781		gi|17549083|ref|NP_522423.1| Hrp associated protein HPAP [Ralstonia solanacearu	-3
782		gi|17549148|ref|NP_522488.1| putative cation efflux system transmembrane protei	-3
783		gi|17549170|ref|NP_522510.1| NAD(P) transhydrogenase alpha subunit P [Ralstonia	-3
784		gi|17549197|ref|NP_522537.1| putative respiratory nitrate reductase oxidoreduct	-3
785		gi|17549206|ref|NP_522546.1| transporter transmembrane protein [Ralstonia solan	-3
786		gi|17549218|ref|NP_522558.1| transcription regulator protein [Ralstonia solanac	-3
787		gi|17549221|ref|NP_522561.1| TEK-like protein [Ralstonia solanacearum GMI1000]	-3
788	RSp1024	gi|17549245|ref|NP_522585.1| AWR family protein [Ralstonia solanacearum GMI1000	-3
789		gi|17549247|ref|NP_522587.1| signal peptide protein [Ralstonia solanacearum GMI	-3
790		gi|17549264|ref|NP_522604.1| two-component sensor histidine kinase transcriptio	-3
791		gi|17549294|ref|NP_522634.1| hemagglutinin-related protein [Ralstonia solanacea	-3
792		gi|17549299|ref|NP_522639.1| putative lipoprotein [Ralstonia solanacearum GMI10	-3
793		gi|17549302|ref|NP_522642.1| signal peptide protein [Ralstonia solanacearum GMI	-3
794		gi|17549335|ref|NP_522675.1| putative outer-membrane drug efflux protein [Ralst	-3
795		gi|17549353|ref|NP_522693.1| hypothetical protein RS05487 [Ralstonia solanacear	-3
796		gi|17549361|ref|NP_522701.1| substrate-binding periplasmic (PBP) ABC transporte	-3
797		gi|17549371|ref|NP_522711.1| hypothetical protein RS05437 [Ralstonia solanacear	-3
798		gi|17549381|ref|NP_522721.1| lipoprotein signal peptide [Ralstonia solanacearum	-3
799		gi|17549388|ref|NP_522728.1| hypothetical protein RS05823 [Ralstonia solanacear	-3
800		gi|17549390|ref|NP_522730.1| hypothetical protein RS05059 [Ralstonia solanacear	-3
801		gi|17549394|ref|NP_522734.1| lipoprotein transmembrane [Ralstonia solanacearum	-3
802		gi|17549415|ref|NP_522755.1| proline rich transmembrane protein [Ralstonia sola	-3
803		gi|17549475|ref|NP_522815.1| integral membrane transmembrane protein [Ralstonia	-3
804		gi|17549506|ref|NP_522846.1| type 4 fimbrial biogenesis signal peptide protein	-3
805		gi|17549511|ref|NP_522851.1| putative type-4 fimbrial pilin related signal pept	-3
806		gi|17549606|ref|NP_522946.1| putative transcription regulator protein [Ralstoni	-3
807		gi|17549651|ref|NP_522991.1| hypothetical protein RS03110 [Ralstonia solanacear	-3
808		gi|17549657|ref|NP_522997.1| methionyl-tRNA synthetase [Ralstonia solanacearum	-3
809	RSp1460	gi|17549679|ref|NP_523019.1| hypothetical protein RS03084 [Ralstonia solanacear	-3
810		gi|17549757|ref|NP_523097.1| putative lipoprotein [Ralstonia solanacearum GMI10	-3
811		gi|17549790|ref|NP_523130.1| transcriptional regulator transcription regulator	-3
812		gi|17549813|ref|NP_523153.1| porin signal peptide protein [Ralstonia solanacear	-3
813		gi|17549855|ref|NP_523195.1| putative oxidoreductase protein [Ralstonia solanac	-3
814		gi|17549868|ref|NP_523208.1| putative transmembrane protein [Ralstonia solanace	-3
815		gi|17549883|ref|NP_523223.1| putative ribonuclease RNase BN (RBN) transmembrane	-3
816		gi|17549886|ref|NP_523226.1| sigma-54 interacting response regulator transcript	-3
817		gi|17544958|ref|NP_518360.1| hypothetical protein RSc0239 [Ralstonia solanacear	-2
818		gi|17545112|ref|NP_518514.1| peptidyl-tRNA hydrolase [Ralstonia solanacearum GM	-2
819		gi|17545139|ref|NP_518541.1| excinuclease ABC subunit A [Ralstonia solanacearum	-2
820		gi|17545203|ref|NP_518605.1| glutamate/aspartate transport ATP-binding ABC tran	-2
821		gi|17545935|ref|NP_519337.1| histidyl-tRNA synthetase [Ralstonia solanacearum G	-2
822		gi|17546034|ref|NP_519436.1| signal peptide protein [Ralstonia solanacearum GMI	-2
823		gi|17546188|ref|NP_519590.1| dehydrogenase oxidoreductase [Ralstonia solanacear	-2
824		gi|17546374|ref|NP_519776.1| integrase/recombinase [Ralstonia solanacearum GMI1	-2
825		gi|17546463|ref|NP_519865.1| isomerase rotamase signal peptide protein [Ralston	-2
826		gi|17546621|ref|NP_520023.1| hypothetical protein RSc1902 [Ralstonia solanacear	-2
827		gi|17546645|ref|NP_520047.1| phage-related transmembrane protein [Ralstonia sol	-2
828		gi|17546735|ref|NP_520137.1| hypothetical protein RSc2016 [Ralstonia solanacear	-2
829		gi|17546760|ref|NP_520162.1| urea/short-chain amide-binding signal peptide prot	-2
830		gi|17546870|ref|NP_520272.1| signal peptide protein [Ralstonia solanacearum GMI	-2
831		gi|17546992|ref|NP_520394.1| hypothetical protein RSc2273 [Ralstonia solanacear	-2
832		gi|17547193|ref|NP_520595.1| hypothetical protein RSc2474 [Ralstonia solanacear	-2
833		gi|17547242|ref|NP_520644.1| transmembrane protein [Ralstonia solanacearum GMI1	-2
834		gi|17547282|ref|NP_520684.1| DNA mismatch repair protein [Ralstonia solanacearu	-2
835		gi|17547302|ref|NP_520704.1| conjugal transfer TrbC transmembrane protein [Rals	-2
836		gi|17547306|ref|NP_520708.1| lipoprotein [Ralstonia solanacearum GMI1000]	-2
837		gi|17547339|ref|NP_520741.1| hypothetical protein RSc2620 [Ralstonia solanacear	-2
838		gi|17547365|ref|NP_520767.1| histidine ammonia-lyase [Ralstonia solanacearum GM	-2
839		gi|17547367|ref|NP_520769.1| histidine utilization repressor transcription regu	-2
840		gi|17547398|ref|NP_520800.1| type 4 fimbrial pilin related transmembrane protei	-2
841		gi|17547423|ref|NP_520825.1| hypothetical protein RSc2704 [Ralstonia solanacear	-2
842		gi|17547751|ref|NP_521153.1| hypothetical protein RSc3032 [Ralstonia solanacear	-2
843		gi|17547837|ref|NP_521239.1| transmembrane protein [Ralstonia solanacearum GMI1	-2
844		gi|17547884|ref|NP_521286.1| hypothetical protein RSc3165 [Ralstonia solanacear	-2
845		gi|17547967|ref|NP_521369.1| signal peptide protein [Ralstonia solanacearum GMI	-2
846		gi|17548033|ref|NP_521435.1| F0F1 ATP synthase subunit epsilon [Ralstonia solan	-2
847		gi|17548043|ref|NP_521445.1| chromosome partitioning protein PARA [Ralstonia so	-2
848		gi|17548071|ref|NP_521473.1| transcription regulator protein [Ralstonia solanac	-2
849		gi|17548253|ref|NP_521593.1| salicylyl-CoA 5-hydroxylase [Ralstonia solanacearu	-2
850		gi|17548358|ref|NP_521698.1| putative transcription regulator protein [Ralstoni	-2
851		gi|17548520|ref|NP_521860.1| hypothetical protein RS05475 [Ralstonia solanacear	-2
852		gi|17548614|ref|NP_521954.1| flagellum-specific ATP synthase [Ralstonia solanac	-2
853		gi|17548834|ref|NP_522174.1| transcription regulator protein [Ralstonia solanac	-2
854		gi|17548845|ref|NP_522185.1| cobalt-precorrin-6Y C(5)-methyltransferase [Ralsto	-2
855		gi|17548998|ref|NP_522338.1| putative transmembrane protein [Ralstonia solanace	-2
856		gi|17549014|ref|NP_522354.1| hypothetical protein RS01914 [Ralstonia solanacear	-2
857		gi|17549048|ref|NP_522388.1| ketoglutarate semialdehyde dehydrogenase protein [	-2
858		gi|17549118|ref|NP_522458.1| signal peptide protein [Ralstonia solanacearum GMI	-2
859	RSp0930	gi|17549151|ref|NP_522491.1| hypothetical protein RS05403 [Ralstonia solanacear	-2
860		gi|17549158|ref|NP_522498.1| putative biotin carboxyl carrier protein of acetyl	-2
861		gi|17549175|ref|NP_522515.1| NAD(P) transhydrogenase subunit beta [Ralstonia so	-2
862		gi|17549191|ref|NP_522531.1| protease protein [Ralstonia solanacearum GMI1000]	-2
863		gi|17549198|ref|NP_522538.1| respiratory nitrate reductase transmembrane protei	-2
864		gi|17549256|ref|NP_522596.1| hypothetical protein RS02372 [Ralstonia solanacear	-2
865		gi|17549276|ref|NP_522616.1| transmembrane aldehyde dehydrogenase oxidoreductas	-2
866		gi|17549309|ref|NP_522649.1| hypothetical protein RS02597 [Ralstonia solanacear	-2
867		gi|17549652|ref|NP_522992.1| hypothetical protein RS03109 [Ralstonia solanacear	-2
868		gi|17549654|ref|NP_522994.1| putative transmembrane protein [Ralstonia solanace	-2
869		gi|17549731|ref|NP_523071.1| putative transcription regulator protein [Ralstoni	-2
870		gi|17549754|ref|NP_523094.1| activation/secretion signal peptide protein [Ralst	-2
871		gi|17549825|ref|NP_523165.1| hypothetical protein RS02163 [Ralstonia solanacear	-2
872		gi|17544723|ref|NP_518125.1| inner membrane protein translocase component YidC	-1
873		gi|17544726|ref|NP_518128.1| hypothetical protein RSc0007 [Ralstonia solanacear	-1
874		gi|17544761|ref|NP_518163.1| ATP-dependent protease ATP-binding subunit [Ralsto	-1
875		gi|17544772|ref|NP_518174.1| hypothetical protein RSc0053 [Ralstonia solanacear	-1
876		gi|17544777|ref|NP_518179.1| aspartyl/glutamyl-tRNA amidotransferase subunit C	-1
877		gi|17544812|ref|NP_518214.1| S-adenosyl-L-homocysteine hydrolase [Ralstonia sol	-1
878		gi|17544818|ref|NP_518220.1| signal peptide protein [Ralstonia solanacearum GMI	-1
879		gi|17544840|ref|NP_518242.1| oxidoreductase flavoprotein FAD [Ralstonia solanac	-1
880		gi|17544842|ref|NP_518244.1| alcohol dehydrogenase oxidoreductase [Ralstonia so	-1
881		gi|17544879|ref|NP_518281.1| transcription regulator protein [Ralstonia solanac	-1
882		gi|17544933|ref|NP_518335.1| transcription regulator protein [Ralstonia solanac	-1
883	RSc0245 (RipB)	gi|17544964|ref|NP_518366.1| hypothetical protein RSc0245 [Ralstonia solanacear	-1
884		gi|17544965|ref|NP_518367.1| calcium binding hemolysin protein [Ralstonia solan	-1
885		gi|17544971|ref|NP_518373.1| ISRSO7-transposase [Ralstonia solanacearum GMI1000	-1
886		gi|17544995|ref|NP_518397.1| acetyl-CoA acetyltransferase [Ralstonia solanacear	-1
887		gi|17545004|ref|NP_518406.1| thiol:disulfide interchange signal peptide protein	-1
888		gi|17545008|ref|NP_518410.1| transmembrane sensor kinase vsrA transcription reg	-1
889		gi|17545016|ref|NP_518418.1| hypothetical protein RSc0297 [Ralstonia solanacear	-1
890		gi|17545055|ref|NP_518457.1| signal peptide protein [Ralstonia solanacearum GMI	-1
891		gi|17545061|ref|NP_518463.1| nitrogen regulatory P-II transcription regulator p	-1
892		gi|17545079|ref|NP_518481.1| biotin synthesis protein (methyltransferase) [Rals	-1
893		gi|17545086|ref|NP_518488.1| cytochrome C oxidase subunit III transmembrane pro	-1
894		gi|17545088|ref|NP_518490.1| transmembrane cytochrome oxidase complex biogenesi	-1
895		gi|17545111|ref|NP_518513.1| prolin-rich transmembrane protein [Ralstonia solan	-1
896		gi|17545141|ref|NP_518543.1| single-strand DNA-binding protein [Ralstonia solan	-1
897		gi|17545163|ref|NP_518565.1| signal peptide protein [Ralstonia solanacearum GMI	-1
898		gi|17545178|ref|NP_518580.1| hypothetical protein RSc0459 [Ralstonia solanacear	-1
899		gi|17545200|ref|NP_518602.1| amino-acid-binding periplasmic (PBP) ABC transport	-1
900		gi|17545216|ref|NP_518618.1| D-tyrosyl-tRNA deacylase [Ralstonia solanacearum G	-1
901		gi|17545220|ref|NP_518622.1| Holliday junction DNA helicase motor protein [Rals	-1
902		gi|17545222|ref|NP_518624.1| Holliday junction resolvase [Ralstonia solanacearu	-1
903		gi|17545249|ref|NP_518651.1| PHOH-like protein [Ralstonia solanacearum GMI1000]	-1
904		gi|17545253|ref|NP_518655.1| lipoprotein transmembrane [Ralstonia solanacearum	-1
905		gi|17545317|ref|NP_518719.1| hypothetical protein RSc0598 [Ralstonia solanacear	-1
906		gi|17545328|ref|NP_518730.1| lipoprotein [Ralstonia solanacearum GMI1000]	-1
907		gi|17545358|ref|NP_518760.1| heat shock protein [Ralstonia solanacearum GMI1000	-1
908		gi|17545366|ref|NP_518768.1| hypothetical protein RSc0647 [Ralstonia solanacear	-1
909		gi|17545372|ref|NP_518774.1| pilus assembly protein [Ralstonia solanacearum GMI	-1
910		gi|17545374|ref|NP_518776.1| outer membrane channel protein [Ralstonia solanace	-1
911		gi|17545402|ref|NP_518804.1| dTDP-4-dehydrorhamnose reductase oxidoreductase [R	-1
912		gi|17545405|ref|NP_518807.1| lipopolysaccharide O-SIDE chain biosynthesis trans	-1
913		gi|17545417|ref|NP_518819.1| transcription regulator protein [Ralstonia solanac	-1
914		gi|17545463|ref|NP_518865.1| DNA/RNA non-specific endonuclease [Ralstonia solan	-1
915		gi|17545469|ref|NP_518871.1| hypothetical protein RSc0750 [Ralstonia solanacear	-1
916		gi|17545475|ref|NP_518877.1| glutaryl-CoA dehydrogenase oxidoreductase [Ralston	-1
917		gi|17545486|ref|NP_518888.1| pyridoxamine 5'-phosphate oxidase [Ralstonia solan	-1
918		gi|17545539|ref|NP_518941.1| transcription regulator protein [Ralstonia solanac	-1
919		gi|17545573|ref|NP_518975.1| hypothetical protein RSc0854 [Ralstonia solanacear	-1
920		gi|17545582|ref|NP_518984.1| hypothetical protein RSc0863 [Ralstonia solanacear	-1
921		gi|17545588|ref|NP_518990.1| cytosine-specific methyltransferase [Ralstonia sol	-1
922		gi|17545624|ref|NP_519026.1| histidinol-phosphate aminotransferase [Ralstonia s	-1
923		gi|17545643|ref|NP_519045.1| electron transfer flavoprotein subunit alpha [Rals	-1
924		gi|17545652|ref|NP_519054.1| 30S ribosomal protein S16 [Ralstonia solanacearum	-1
925		gi|17545656|ref|NP_519058.1| hypothetical protein RSc0937 [Ralstonia solanacear	-1
926		gi|17545662|ref|NP_519064.1| molybdenum cofactor biosynthesis protein [Ralstoni	-1
927		gi|17545676|ref|NP_519078.1| hypothetical protein RSc0957 [Ralstonia solanacear	-1
928		gi|17545767|ref|NP_519169.1| 50S ribosomal protein L32 [Ralstonia solanacearum	-1
929		gi|17545783|ref|NP_519185.1| GTP-binding protein Era [Ralstonia solanacearum GM	-1
930		gi|17545787|ref|NP_519189.1| beta-hexosaminidase [Ralstonia solanacearum GMI100	-1
931		gi|17545813|ref|NP_519215.1| transcriptional regulatory DNA-binding transcripti	-1
932		gi|17545815|ref|NP_519217.1| aspartate aminotransferase [Ralstonia solanacearum	-1
933		gi|17545818|ref|NP_519220.1| L-serine dehydratase [Ralstonia solanacearum GMI10	-1
934		gi|17545848|ref|NP_519250.1| phosphopyruvate hydratase [Ralstonia solanacearum	-1
935		gi|17545861|ref|NP_519263.1| integral membrane transmembrane protein [Ralstonia	-1
936		gi|17545864|ref|NP_519266.1| dihydrodipicolinate synthase [Ralstonia solanacear	-1
937		gi|17545869|ref|NP_519271.1| hypothetical protein RSc1150 [Ralstonia solanacear	-1
938		gi|17545898|ref|NP_519300.1| glutamyl-tRNA synthetase [Ralstonia solanacearum G	-1
939		gi|17545915|ref|NP_519317.1| DNA-binding transcriptional regulatory transcripti	-1
940		gi|17545921|ref|NP_519323.1| flavoprotein NADH-dependent oxidoreductase [Ralsto	-1
941		gi|17545934|ref|NP_519336.1| 4-hydroxy-3-methylbut-2-en-1-yl diphosphate syntha	-1
942		gi|17545950|ref|NP_519352.1| transaldolase B [Ralstonia solanacearum GMI1000]	-1
943		gi|17545968|ref|NP_519370.1| hypothetical protein RSc1249 [Ralstonia solanacear	-1
944		gi|17546013|ref|NP_519415.1| outer membrane CHANEL lipoprotein [Ralstonia solan	-1
945		gi|17546018|ref|NP_519420.1| tRNA-dihydrouridine synthase A [Ralstonia solanace	-1
946		gi|17546045|ref|NP_519447.1| aminotransferase AlaT [Ralstonia solanacearum GMI1	-1
947		gi|17546067|ref|NP_519469.1| CysB family transcriptional regulator [Ralstonia s	-1
948		gi|17546114|ref|NP_519516.1| hypothetical protein RSc1395 [Ralstonia solanacear	-1
949		gi|17546166|ref|NP_519568.1| transcription regulator protein [Ralstonia solanac	-1
950		gi|17546172|ref|NP_519574.1| ABC transporter ATP-binding protein [Ralstonia sol	-1
951		gi|17546178|ref|NP_519580.1| hypothetical protein RSc1459 [Ralstonia solanacear	-1
952		gi|17546221|ref|NP_519623.1| hypothetical protein RSc1502 [Ralstonia solanacear	-1
953		gi|17546236|ref|NP_519638.1| hypothetical protein RSc1517 [Ralstonia solanacear	-1
954		gi|17546243|ref|NP_519645.1| hypothetical protein RSc1524 [Ralstonia solanacear	-1
955		gi|17546277|ref|NP_519679.1| TRP repressor binding protein [Ralstonia solanacea	-1
956		gi|17546280|ref|NP_519682.1| hydrolase [Ralstonia solanacearum GMI1000]	-1
957		gi|17546282|ref|NP_519684.1| hypothetical protein RSc1563 [Ralstonia solanacear	-1
958		gi|17546283|ref|NP_519685.1| hypothetical protein RSc1564 [Ralstonia solanacear	-1
959		gi|17546303|ref|NP_519705.1| transcription regulator protein [Ralstonia solanac	-1
960		gi|17546345|ref|NP_519747.1| ATP-dependent DNA helicase-related protein [Ralsto	-1
961		gi|17546361|ref|NP_519763.1| transcription-repair coupling factor protein [Rals	-1
962		gi|17546365|ref|NP_519767.1| alkyl hydroperoxide reductase (subunit C) oxidored	-1
963		gi|17546368|ref|NP_519770.1| transmembrane protein [Ralstonia solanacearum GMI1	-1
964		gi|17546376|ref|NP_519778.1| hypothetical protein RSc1657 [Ralstonia solanacear	-1
965		gi|17546380|ref|NP_519782.1| hypothetical protein RSc1661 [Ralstonia solanacear	-1
966		gi|17546385|ref|NP_519787.1| hypothetical protein RSc1666 [Ralstonia solanacear	-1
967		gi|17546393|ref|NP_519795.1| hypothetical protein RSc1674 [Ralstonia solanacear	-1
968		gi|17546398|ref|NP_519800.1| hypothetical protein RSc1679 [Ralstonia solanacear	-1
969		gi|17546407|ref|NP_519809.1| hypothetical protein RSc1688 [Ralstonia solanacear	-1
970		gi|17546418|ref|NP_519820.1| hypothetical protein RSc1699 [Ralstonia solanacear	-1
971		gi|17546436|ref|NP_519838.1| esterase signal peptide protein [Ralstonia solanac	-1
972		gi|17546467|ref|NP_519869.1| hypothetical protein RSc1748 [Ralstonia solanacear	-1
973		gi|17546555|ref|NP_519957.1| hypothetical protein RSc1836 [Ralstonia solanacear	-1
974		gi|17546562|ref|NP_519964.1| transposase [Ralstonia solanacearum GMI1000]	-1
975		gi|17546595|ref|NP_519997.1| hypothetical protein RSc1876 [Ralstonia solanacear	-1
976		gi|17546606|ref|NP_520008.1| acyl coenzyme A thioester hydrolase [Ralstonia sol	-1
977		gi|17546631|ref|NP_520033.1| hypothetical protein RSc1912 [Ralstonia solanacear	-1
978		gi|17546652|ref|NP_520054.1| phage-like transmembrane protein [Ralstonia solana	-1
979		gi|17546689|ref|NP_520091.1| hypothetical protein RSc1970 [Ralstonia solanacear	-1
980		gi|17546714|ref|NP_520116.1| transmembrane succinate dehydrogenase (hydrophobic	-1
981		gi|17546738|ref|NP_520140.1| signal peptide protein [Ralstonia solanacearum GMI	-1
982		gi|17546814|ref|NP_520216.1| xanthine dehydrogenase subunit A [Ralstonia solana	-1
983		gi|17546827|ref|NP_520229.1| porin signal peptide protein [Ralstonia solanacear	-1
984		gi|17546839|ref|NP_520241.1| hypothetical protein RSc2120 [Ralstonia solanacear	-1
985		gi|17546847|ref|NP_520249.1| D-arabinitol kinase [Ralstonia solanacearum GMI100	-1
986		gi|17546896|ref|NP_520298.1| lipoprotein [Ralstonia solanacearum GMI1000]	-1
987		gi|17546910|ref|NP_520312.1| phosphoribosylamine--glycine ligase [Ralstonia sol	-1
988		gi|17546914|ref|NP_520316.1| SPOUT methyltransferase superfamily protein [Ralst	-1
989		gi|17546927|ref|NP_520329.1| pirin-like protein [Ralstonia solanacearum GMI1000	-1
990		gi|17546954|ref|NP_520356.1| DNA helicase II protein [Ralstonia solanacearum GM	-1
991		gi|17546959|ref|NP_520361.1| hypothetical protein RSc2240 [Ralstonia solanacear	-1
992		gi|17546969|ref|NP_520371.1| B-ketoadipate enol-lactone hydrolase transmembrane	-1
993		gi|17547023|ref|NP_520425.1| hypothetical protein RSc2304 [Ralstonia solanacear	-1
994		gi|17547041|ref|NP_520443.1| transcription regulator protein [Ralstonia solanac	-1
995		gi|17547051|ref|NP_520453.1| ISRSO10-transposase ORFA protein [Ralstonia solana	-1
996		gi|17547095|ref|NP_520497.1| ferredoxin protein [Ralstonia solanacearum GMI1000	-1
997		gi|17547131|ref|NP_520533.1| dihydroxy-acid dehydratase [Ralstonia solanacearum	-1
998		gi|17547151|ref|NP_520553.1| hypothetical protein RSc2432 [Ralstonia solanacear	-1
999		gi|17547164|ref|NP_520566.1| 50S ribosomal protein L28 [Ralstonia solanacearum	-1
1000		gi|17547172|ref|NP_520574.1| hypothetical protein RSc2453 [Ralstonia solanacear	-1
1001		gi|17547204|ref|NP_520606.1| hypothetical protein RSc2485 [Ralstonia solanacear	-1
1002		gi|17547221|ref|NP_520623.1| hypothetical protein RSc2502 [Ralstonia solanacear	-1
1003		gi|17547223|ref|NP_520625.1| glucose-1-dehydrogenase [Ralstonia solanacearum GM	-1
1004		gi|17547233|ref|NP_520635.1| signal peptide protein [Ralstonia solanacearum GMI	-1
1005		gi|17547271|ref|NP_520673.1| hypothetical protein RSc2552 [Ralstonia solanacear	-1
1006		gi|17547280|ref|NP_520682.1| lipoprotein [Ralstonia solanacearum GMI1000]	-1
1007		gi|17547304|ref|NP_520706.1| hypothetical protein RSc2585 [Ralstonia solanacear	-1
1008		gi|17547336|ref|NP_520738.1| hypothetical protein RSc2617 [Ralstonia solanacear	-1
1009		gi|17547346|ref|NP_520748.1| polynucleotide adenylyltransferase [Ralstonia sola	-1
1010		gi|17547380|ref|NP_520782.1| transcription regulator protein [Ralstonia solanac	-1
1011		gi|17547394|ref|NP_520796.1| type 4 fimbrial biogenesis PILY1-related protein s	-1
1012		gi|17547454|ref|NP_520856.1| regulatory protein [Ralstonia solanacearum GMI1000	-1
1013		gi|17547469|ref|NP_520871.1| transketolase [Ralstonia solanacearum GMI1000]	-1
1014		gi|17547525|ref|NP_520927.1| N-acetyl-anhydromuranmyl-L-alanine amidase [Ralsto	-1
1015		gi|17547573|ref|NP_520975.1| hypothetical protein RSc2854 [Ralstonia solanacear	-1
1016		gi|17547648|ref|NP_521050.1| transmembrane ubiquinol-cytochrome C reductase (IR	-1
1017		gi|17547697|ref|NP_521099.1| proline-rich transmembrane protein [Ralstonia sola	-1
1018		gi|17547724|ref|NP_521126.1| 30S ribosomal protein S8 [Ralstonia solanacearum G	-1
1019		gi|17547738|ref|NP_521140.1| 50S ribosomal protein L3 [Ralstonia solanacearum G	-1
1020		gi|17547746|ref|NP_521148.1| signal peptide protein [Ralstonia solanacearum GMI	-1
1021		gi|17547753|ref|NP_521155.1| DNA-directed RNA polymerase subunit beta [Ralstoni	-1
1022		gi|17547799|ref|NP_521201.1| transcription regulator protein [Ralstonia solanac	-1
1023		gi|17547833|ref|NP_521235.1| general secretion pathway protein D [Ralstonia sol	-1
1024		gi|17547841|ref|NP_521243.1| indolepyruvate ferredoxin oxidoreductase [Ralstoni	-1
1025		gi|17547854|ref|NP_521256.1| hypothetical protein RSc3135 [Ralstonia solanacear	-1
1026		gi|17547871|ref|NP_521273.1| hypothetical protein RSc3152 [Ralstonia solanacear	-1
1027		gi|17547873|ref|NP_521275.1| signal peptide protein [Ralstonia solanacearum GMI	-1
1028		gi|17547879|ref|NP_521281.1| two component sensor histidine kinase transcriptio	-1
1029		gi|17547907|ref|NP_521309.1| hemagglutinin-related protein [Ralstonia solanacea	-1
1030		gi|17547909|ref|NP_521311.1| hypothetical protein RSc3190 [Ralstonia solanacear	-1
1031		gi|17547934|ref|NP_521336.1| hypothetical protein RSc3215 [Ralstonia solanacear	-1
1032		gi|17547935|ref|NP_521337.1| hypothetical protein RSc3216 [Ralstonia solanacear	-1
1033		gi|17547982|ref|NP_521384.1| hypothetical protein RSc3265 [Ralstonia solanacear	-1
1034		gi|17548034|ref|NP_521436.1| F0F1 ATP synthase subunit beta [Ralstonia solanace	-1
1035		gi|17548048|ref|NP_521450.1| short chain dehydrogenase [Ralstonia solanacearum	-1
1036		gi|17548064|ref|NP_521466.1| transcription regulator protein [Ralstonia solanac	-1
1037		gi|17548091|ref|NP_521493.1| 5'-methylthioadenosine/S-adenosylhomocysteine nucl	-1
1038		gi|17548111|ref|NP_521513.1| restriction modification enzyme R subunit protein	-1
1039		gi|17548134|ref|NP_521536.1| hypothetical protein RSc3417 [Ralstonia solanacear	-1
1040		gi|17548246|ref|NP_521586.1| hypothetical protein RS06177 [Ralstonia solanacear	-1
1041		gi|17548251|ref|NP_521591.1| oxacillin hydrolase [Ralstonia solanacearum GMI100	-1
1042		gi|17548274|ref|NP_521614.1| glutathione-independent formaldehyde dehydrogenase	-1
1043		gi|17548309|ref|NP_521649.1| hypothetical protein RS05533 [Ralstonia solanacear	-1
1044		gi|17548321|ref|NP_521661.1| putative ferrisiderophore receptor protein [Ralsto	-1
1045		gi|17548323|ref|NP_521663.1| putative insertion sequence [Ralstonia solanacearu	-1
1046		gi|17548325|ref|NP_521665.1| hypothetical protein RS03019 [Ralstonia solanacear	-1
1047		gi|17548342|ref|NP_521682.1| methylcitrate synthase [Ralstonia solanacearum GMI	-1
1048		gi|161621738|ref|NP_521683.2| 2-methylisocitrate lyase [Ralstonia solanacearum	-1
1049		gi|17548359|ref|NP_521699.1| putative pectinesterase [Ralstonia solanacearum GM	-1
1050		gi|17548367|ref|NP_521707.1| hypothetical protein RS02974 [Ralstonia solanacear	-1
1051		gi|17548392|ref|NP_521732.1| hypothetical protein RS04683 [Ralstonia solanacear	-1
1052		gi|17548406|ref|NP_521746.1| putative transcription regulator protein [Ralstoni	-1
1053	RSp0218	gi|17548439|ref|NP_521779.1| hypothetical protein RS05208 [Ralstonia solanacear	-1
1054		gi|17548478|ref|NP_521818.1| hypothetical protein RS03709 [Ralstonia solanacear	-1
1055		gi|17548501|ref|NP_521841.1| hypothetical protein RS03684 [Ralstonia solanacear	-1
1056		gi|17548504|ref|NP_521844.1| DNA-damage-inducible F transmembrane protein [Rals	-1
1057		gi|17548537|ref|NP_521877.1| putative transmembrane protein [Ralstonia solanace	-1
1058	RSp0323 (HopG)	gi|17548544|ref|NP_521884.1| hypothetical protein RS05444 [Ralstonia solanacear	-1
1059		gi|17548555|ref|NP_521895.1| hypothetical protein RS00710 [Ralstonia solanacear	-1
1060		gi|17548559|ref|NP_521899.1| negative regulator of exopolysaccharide production	-1
1061		gi|17548562|ref|NP_521902.1| flagellar basal body P-ring biosynthesis protein F	-1
1062		gi|17548568|ref|NP_521908.1| flagellar basal-body rod protein FlgG [Ralstonia s	-1
1063		gi|17548579|ref|NP_521919.1| 3-oxoacyl-(acyl carrier protein) synthase II [Rals	-1
1064		gi|17548580|ref|NP_521920.1| 3-ketoacyl-(acyl-carrier-protein) reductase [Ralst	-1
1065		gi|17548596|ref|NP_521936.1| flagellar biosynthesis protein FliP [Ralstonia sol	-1
1066		gi|17548605|ref|NP_521945.1| flagellar protein FliS [Ralstonia solanacearum GMI	-1
1067		gi|17548633|ref|NP_521973.1| putative fosmidomycin resistance antibiotic resist	-1
1068		gi|17548664|ref|NP_522004.1| transcription regulator protein [Ralstonia solanac	-1
1069		gi|17548665|ref|NP_522005.1| putative pirin-like protein [Ralstonia solanacearu	-1
1070		gi|17548670|ref|NP_522010.1| putative RSH-related protein [Ralstonia solanacear	-1
1071		gi|17548699|ref|NP_522039.1| ISRSO7-transposase protein [Ralstonia solanacearum	-1
1072		gi|17548717|ref|NP_522057.1| hypothetical protein RS00374 [Ralstonia solanacear	-1
1073		gi|17548720|ref|NP_522060.1| putative transport transmembrane protein [Ralstoni	-1
1074		gi|17548738|ref|NP_522078.1| hypothetical protein RS00396 [Ralstonia solanacear	-1
1075		gi|17548762|ref|NP_522102.1| hypothetical protein RS05801 [Ralstonia solanacear	-1
1076		gi|17548763|ref|NP_522103.1| hypothetical protein RS05800 [Ralstonia solanacear	-1
1077		gi|17548770|ref|NP_522110.1| hypothetical protein RS03931 [Ralstonia solanacear	-1
1078		gi|17548773|ref|NP_522113.1| hypothetical protein RS03927 [Ralstonia solanacear	-1
1079		gi|17548784|ref|NP_522124.1| putative thiol:disulfide interchange protein [Rals	-1
1080		gi|17548797|ref|NP_522137.1| hypothetical protein RS03903 [Ralstonia solanacear	-1
1081		gi|17548847|ref|NP_522187.1| cobalamin biosynthesis protein [Ralstonia solanace	-1
1082		gi|17548851|ref|NP_522191.1| phospholipase protein [Ralstonia solanacearum GMI1	-1
1083		gi|17548868|ref|NP_522208.1| putative enoyl-coenzyme A hydratase protein [Ralst	-1
1084		gi|17548869|ref|NP_522209.1| enoyl-CoA hydratase [Ralstonia solanacearum GMI100	-1
1085		gi|17548877|ref|NP_522217.1| copper resistance transmembrane protein [Ralstonia	-1
1086		gi|17548879|ref|NP_522219.1| copper resistance C signal peptide protein [Ralsto	-1
1087		gi|17548928|ref|NP_522268.1| amino-acid composite ATP-binding transmembrane ABC	-1
1088		gi|17548930|ref|NP_522270.1| putative cytochrome P-450-like monooxygenase oxido	-1
1089		gi|17548981|ref|NP_522321.1| hypothetical protein RS01948 [Ralstonia solanacear	-1
1090		gi|17549006|ref|NP_522346.1| hypothetical protein RS01922 [Ralstonia solanacear	-1
1091		gi|17549012|ref|NP_522352.1| hypothetical protein RS01916 [Ralstonia solanacear	-1
1092		gi|17549027|ref|NP_522367.1| hypothetical protein RS01901 [Ralstonia solanacear	-1
1093		gi|17549065|ref|NP_522405.1| hypothetical protein RS05352 [Ralstonia solanacear	-1
1094		gi|17549080|ref|NP_522420.1| Hrp conserved HRCS transmembrane protein [Ralstoni	-1
1095		gi|17549085|ref|NP_522425.1| type III secretion system protein HrcU [Ralstonia	-1
1096		gi|17549145|ref|NP_522485.1| hypothetical protein RS05410 [Ralstonia solanacear	-1
1097		gi|17549183|ref|NP_522523.1| putative transcription regulator protein [Ralstoni	-1
1098		gi|17549222|ref|NP_522562.1| signal peptide protein [Ralstonia solanacearum GMI	-1
1099		gi|17549246|ref|NP_522586.1| putative amino-acid efflux transmembrane protein [	-1
1100		gi|17549278|ref|NP_522618.1| putative transcription regulator protein [Ralstoni	-1
1101		gi|17549308|ref|NP_522648.1| outer membrane channel signal peptide protein [Ral	-1
1102		gi|17549318|ref|NP_522658.1| hypothetical protein RS02603 [Ralstonia solanacear	-1
1103		gi|17549322|ref|NP_522662.1| UDP-glucose 4-epimerase protein [Ralstonia solanac	-1
1104		gi|17549343|ref|NP_522683.1| hypothetical protein RS05497 [Ralstonia solanacear	-1
1105		gi|17549349|ref|NP_522689.1| putative arsenate reductase (arsenical PUMP modifi	-1
1106		gi|17549355|ref|NP_522695.1| hypothetical protein RS05509 [Ralstonia solanacear	-1
1107		gi|17549362|ref|NP_522702.1| transcription regulator protein [Ralstonia solanac	-1
1108		gi|17549377|ref|NP_522717.1| signal peptide protein [Ralstonia solanacearum GMI	-1
1109		gi|17549387|ref|NP_522727.1| putative signal peptide protein [Ralstonia solanac	-1
1110		gi|17549402|ref|NP_522742.1| putative outer membrane efflux transmembrane prote	-1
1111		gi|17549411|ref|NP_522751.1| keto-hydroxyglutarate-aldolase/keto-deoxy-phosphog	-1
1112		gi|17549426|ref|NP_522766.1| hypothetical protein RS03149 [Ralstonia solanacear	-1
1113	RSp1218	gi|17549439|ref|NP_522779.1| hypothetical protein RS03162 [Ralstonia solanacear	-1
1114		gi|17549440|ref|NP_522780.1| nitrate reductase large subunit oxidoreductase pro	-1
1115		gi|17549458|ref|NP_522798.1| transcription regulator protein [Ralstonia solanac	-1
1116		gi|17549476|ref|NP_522816.1| transcription regulator protein [Ralstonia solanac	-1
1117		gi|17549481|ref|NP_522821.1| hypothetical protein RS05307 [Ralstonia solanacear	-1
1118		gi|17549533|ref|NP_522873.1| hypothetical protein RS05663 [Ralstonia solanacear	-1
1119		gi|17549564|ref|NP_522904.1| hypothetical protein RS04774 [Ralstonia solanacear	-1
1120		gi|17549604|ref|NP_522944.1| hypothetical protein RS02073 [Ralstonia solanacear	-1
1121		gi|17549677|ref|NP_523017.1| transporter transmembrane protein [Ralstonia solan	-1
1122		gi|17549680|ref|NP_523020.1| signal peptide protein [Ralstonia solanacearum GMI	-1
1123		gi|17549685|ref|NP_523025.1| signal peptide protein [Ralstonia solanacearum GMI	-1
1124		gi|17549711|ref|NP_523051.1| hypothetical protein RS03051 [Ralstonia solanacear	-1
1125		gi|17549759|ref|NP_523099.1| hypothetical protein RS02096 [Ralstonia solanacear	-1
1126		gi|17549770|ref|NP_523110.1| hypothetical protein RS02107 [Ralstonia solanacear	-1
1127		gi|17549802|ref|NP_523142.1| hypothetical protein RS02139 [Ralstonia solanacear	-1
1128		gi|17549872|ref|NP_523212.1| putative cytochrome C oxidase polypeptide II oxido	-1
1129		gi|17549881|ref|NP_523221.1| peptide chain release factor 3 [Ralstonia solanace	-1
1130		gi|17549888|ref|NP_523228.1| hypothetical protein RS02228 [Ralstonia solanacear	-1
1131		gi|17544901|ref|NP_518303.1| hypothetical protein RSc0182 [Ralstonia solanacear	0
1132		gi|17545042|ref|NP_518444.1| lipoyltransferase [Ralstonia solanacearum GMI1000]	0
1133		gi|17545167|ref|NP_518569.1| 7-cyano-7-deazaguanine reductase [Ralstonia solana	0
1134		gi|17545215|ref|NP_518617.1| tyrosyl-tRNA synthetase [Ralstonia solanacearum GM	0
1135		gi|17545279|ref|NP_518681.1| molybdenum cofactor biosynthesis protein C [Ralsto	0
1136		gi|17545295|ref|NP_518697.1| phosphoribosylaminoimidazole carboxylase ATPase su	0
1137		gi|17545312|ref|NP_518714.1| hypothetical protein RSc0593 [Ralstonia solanacear	0
1138		gi|17545321|ref|NP_518723.1| hypothetical protein RSc0602 [Ralstonia solanacear	0
1139		gi|17545550|ref|NP_518952.1| hypothetical protein RSc0831 [Ralstonia solanacear	0
1140		gi|17545559|ref|NP_518961.1| hypothetical protein RSc0840 [Ralstonia solanacear	0
1141		gi|17545603|ref|NP_519005.1| hypothetical protein RSc0884 [Ralstonia solanacear	0
1142		gi|17545613|ref|NP_519015.1| signal peptide protein [Ralstonia solanacearum GMI	0
1143		gi|17545658|ref|NP_519060.1| hypothetical protein RSc0939 [Ralstonia solanacear	0
1144		gi|17545784|ref|NP_519186.1| DNA repair protein RecO [Ralstonia solanacearum GM	0
1145		gi|17546065|ref|NP_519467.1| sulfate transport ABC transporter protein [Ralston	0
1146		gi|17546152|ref|NP_519554.1| hypothetical protein RSc1433 [Ralstonia solanacear	0
1147		gi|17546154|ref|NP_519556.1| ISRSO10-transposase ORFB protein [Ralstonia solana	0
1148		gi|17546190|ref|NP_519592.1| CREA signal peptide protein [Ralstonia solanacearu	0
1149		gi|17546227|ref|NP_519629.1| hypothetical protein RSc1508 [Ralstonia solanacear	0
1150		gi|17546329|ref|NP_519731.1| transcription regulator protein [Ralstonia solanac	0
1151		gi|17546338|ref|NP_519740.1| dihydroorotate dehydrogenase 2 [Ralstonia solanace	0
1152		gi|17546605|ref|NP_520007.1| periplasmic dipeptide transport protein precursor	0
1153		gi|17546705|ref|NP_520107.1| hypothetical protein RSc1986 [Ralstonia solanacear	0
1154		gi|17546826|ref|NP_520228.1| hypothetical protein RSc2107 [Ralstonia solanacear	0
1155		gi|17546865|ref|NP_520267.1| fructokinase [Ralstonia solanacearum GMI1000]	0
1156		gi|17546972|ref|NP_520374.1| 3-oxoadipate CoA-transferase subunit B protein [Ra	0
1157		gi|17547098|ref|NP_520500.1| MRP family ATP-binding protein [Ralstonia solanace	0
1158		gi|17547206|ref|NP_520608.1| hypothetical protein RSc2487 [Ralstonia solanacear	0
1159		gi|17547330|ref|NP_520732.1| hypothetical protein RSc2611 [Ralstonia solanacear	0
1160		gi|17547377|ref|NP_520779.1| nitrilase [Ralstonia solanacearum GMI1000]	0
1161		gi|17547478|ref|NP_520880.1| 2-dehydro-3-deoxygalactonokinase [Ralstonia solana	0
1162	RSc2775 (HrpW)	gi|17547494|ref|NP_520896.1| HARPIN-like protein [Ralstonia solanacearum GMI100	0
1163		gi|17547511|ref|NP_520913.1| outer membrane lipoprotein transmembrane [Ralstoni	0
1164		gi|17547675|ref|NP_521077.1| ABC transporter ATP-binding protein [Ralstonia sol	0
1165		gi|17547712|ref|NP_521114.1| DNA-directed RNA polymerase subunit alpha [Ralston	0
1166		gi|17547835|ref|NP_521237.1| general secretion pathway protein F [Ralstonia sol	0
1167		gi|17547855|ref|NP_521257.1| methyl-accepting chemotaxis transmembrane protein	0
1168		gi|17547878|ref|NP_521280.1| hypothetical protein RSc3159 [Ralstonia solanacear	0
1169		gi|17547897|ref|NP_521299.1| ATP binding protein [Ralstonia solanacearum GMI100	0
1170		gi|17547929|ref|NP_521331.1| hypothetical protein RSc3210 [Ralstonia solanacear	0
1171		gi|17547946|ref|NP_521348.1| hypothetical protein RSc3227 [Ralstonia solanacear	0
1172		gi|17547974|ref|NP_521376.1| signal peptide protein [Ralstonia solanacearum GMI	0
1173		gi|17548008|ref|NP_521410.1| hypothetical protein RSc3291 [Ralstonia solanacear	0
1174		gi|17548105|ref|NP_521507.1| two-component response regulator transcription reg	0
1175		gi|17548224|ref|NP_521564.1| partition protein [Ralstonia solanacearum GMI1000]	0
1176		gi|17548282|ref|NP_521622.1| putative electron transfer flavoprotein beta-subun	0
1177		gi|17548291|ref|NP_521631.1| putative formate dehydrogenase oxidoreductase prot	0
1178		gi|17548383|ref|NP_521723.1| endoglucanase precursor (endo-1,4-BETA-glucanase)	0
1179		gi|17548401|ref|NP_521741.1| hypothetical protein RS04692 [Ralstonia solanacear	0
1180		gi|17548480|ref|NP_521820.1| pyrrolidone-carboxylate peptidase protein [Ralston	0
1181		gi|17548535|ref|NP_521875.1| two component response regulator transcription reg	0
1182		gi|17548681|ref|NP_522021.1| ISRSO10-transposase ORFB protein [Ralstonia solana	0
1183		gi|17548698|ref|NP_522038.1| putative RHS-related transmembrane protein [Ralsto	0
1184		gi|17548947|ref|NP_522287.1| MFS family transporter [Ralstonia solanacearum GMI	0
1185		gi|17548963|ref|NP_522303.1| putative lipoprotein [Ralstonia solanacearum GMI10	0
1186		gi|17548988|ref|NP_522328.1| hypothetical protein RS01941 [Ralstonia solanacear	0
1187		gi|17549029|ref|NP_522369.1| hemagglutinin-related transmembrane protein [Ralst	0
1188		gi|17549147|ref|NP_522487.1| putative outer membrane cation efflux protein [Ral	0
1189		gi|17549190|ref|NP_522530.1| hypothetical protein RS02300 [Ralstonia solanacear	0
1190		gi|17549267|ref|NP_522607.1| amino acid transporter transmembrane protein [Rals	0
1191		gi|17549316|ref|NP_522656.1| activation/secretion signal peptide protein [Ralst	0
1192		gi|17549323|ref|NP_522663.1| integrase/recombinase protein [Ralstonia solanacea	0
1193		gi|17549375|ref|NP_522715.1| hypothetical protein RS05433 [Ralstonia solanacear	0
1194		gi|17549376|ref|NP_522716.1| hypothetical protein RS05432 [Ralstonia solanacear	0
1195		gi|17549469|ref|NP_522809.1| lipoprotein signal peptide [Ralstonia solanacearum	0
1196		gi|17549648|ref|NP_522988.1| esterase protein [Ralstonia solanacearum GMI1000]	0
1197		gi|17549703|ref|NP_523043.1| putative esterase protein [Ralstonia solanacearum	0
1198		gi|17549737|ref|NP_523077.1| alanin-rich signal peptide protein [Ralstonia sola	0
1199		gi|17549793|ref|NP_523133.1| putative transcriptional regulator transcription r	0
1200		gi|17549897|ref|NP_523237.1| hypothetical protein RS02237 [Ralstonia solanacear	0
1201		gi|17544751|ref|NP_518153.1| hypothetical protein RSc0032 [Ralstonia solanacear	1
1202		gi|17544771|ref|NP_518173.1| site-specific tyrosine recombinase XerC [Ralstonia	1
1203		gi|17544794|ref|NP_518196.1| RNA methyltransferase (SUN protein) [Ralstonia sol	1
1204		gi|17544808|ref|NP_518210.1| hypothetical protein RSc0089 [Ralstonia solanacear	1
1205		gi|17544813|ref|NP_518215.1| lipoprotein transmembrane [Ralstonia solanacearum	1
1206		gi|17544830|ref|NP_518232.1| sulfur carrier protein ThiS [Ralstonia solanacearu	1
1207		gi|17544841|ref|NP_518243.1| substrate-binding periplasmic (PBP) ABC transporte	1
1208		gi|17544846|ref|NP_518248.1| hemagglutinin-related protein [Ralstonia solanacea	1
1209		gi|17544867|ref|NP_518269.1| hypothetical protein RSc0148 [Ralstonia solanacear	1
1210		gi|17544887|ref|NP_518289.1| hypothetical protein RSc0168 [Ralstonia solanacear	1
1211		gi|17544890|ref|NP_518292.1| short chain dehydrogenase [Ralstonia solanacearum	1
1212		gi|17544896|ref|NP_518298.1| UDP-N-acetylglucosamine pyrophosphorylase [Ralston	1
1213		gi|17544916|ref|NP_518318.1| cytochrome C signal peptide protein [Ralstonia sol	1
1214		gi|17544917|ref|NP_518319.1| hypothetical protein RSc0198 [Ralstonia solanacear	1
1215		gi|17544937|ref|NP_518339.1| hypothetical protein RSc0218 [Ralstonia solanacear	1
1216		gi|17544953|ref|NP_518355.1| transcription regulator protein [Ralstonia solanac	1
1217		gi|17544962|ref|NP_518364.1| transcriptional regulator transcription regulator	1
1218		gi|17544963|ref|NP_518365.1| 3-hydroxybutyryl-CoA dehydrogenase [Ralstonia sola	1
1219		gi|17544977|ref|NP_518379.1| beta lactamase [Ralstonia solanacearum GMI1000]	1
1220		gi|17544981|ref|NP_518383.1| 2-hydroxyacid dehydrogenase oxidoreductase [Ralsto	1
1221		gi|17544986|ref|NP_518388.1| enoyl-CoA hydratase [Ralstonia solanacearum GMI100	1
1222		gi|17544992|ref|NP_518394.1| 2-hydroxychromene-2-carboxylate isomerase [Ralston	1
1223		gi|17545002|ref|NP_518404.1| hypothetical protein RSc0283 [Ralstonia solanacear	1
1224		gi|17545019|ref|NP_518421.1| transcription regulator protein [Ralstonia solanac	1
1225		gi|17545023|ref|NP_518425.1| enoyl-CoA hydratase [Ralstonia solanacearum GMI100	1
1226		gi|17545030|ref|NP_518432.1| pantothenate kinase [Ralstonia solanacearum GMI100	1
1227		gi|17545035|ref|NP_518437.1| lipoprotein [Ralstonia solanacearum GMI1000]	1
1228		gi|17545036|ref|NP_518438.1| hypothetical protein RSc0317 [Ralstonia solanacear	1
1229		gi|17545044|ref|NP_518446.1| DNA-binding transcriptional activator GcvA [Ralsto	1
1230		gi|17545066|ref|NP_518468.1| phosphohistidinoprotein-hexose phosphotransferase	1
1231		gi|17545075|ref|NP_518477.1| preprotein translocase subunit SecB [Ralstonia sol	1
1232		gi|17545148|ref|NP_518550.1| hypothetical protein RSc0429 [Ralstonia solanacear	1
1233		gi|17545194|ref|NP_518596.1| acetyl-CoA acetyltransferase [Ralstonia solanacear	1
1234		gi|17545209|ref|NP_518611.1| 50S ribosomal protein L13 [Ralstonia solanacearum	1
1235		gi|17545213|ref|NP_518615.1| iron-sulfur cluster insertion protein ErpA [Ralsto	1
1236		gi|17545218|ref|NP_518620.1| phosphoglycerate mutase 2 protein [Ralstonia solan	1
1237		gi|17545230|ref|NP_518632.1| mannose-1-phosphate guanyltransferase-related prot	1
1238		gi|17545254|ref|NP_518656.1| signal peptide protein [Ralstonia solanacearum GMI	1
1239		gi|17545271|ref|NP_518673.1| recombination regulator RecX [Ralstonia solanacear	1
1240		gi|17545294|ref|NP_518696.1| phosphoribosylaminoimidazole carboxylase catalytic	1
1241		gi|17545302|ref|NP_518704.1| molybdopterin-guanine dinucleotide biosynthesis pr	1
1242		gi|17545304|ref|NP_518706.1| transport transmembrane protein [Ralstonia solanac	1
1243		gi|17545305|ref|NP_518707.1| hypothetical protein RSc0586 [Ralstonia solanacear	1
1244		gi|17545309|ref|NP_518711.1| transcription regulator protein [Ralstonia solanac	1
1245		gi|17545311|ref|NP_518713.1| hypothetical protein RSc0592 [Ralstonia solanacear	1
1246		gi|17545319|ref|NP_518721.1| hypothetical protein RSc0600 [Ralstonia solanacear	1
1247		gi|17545329|ref|NP_518731.1| signal peptide protein [Ralstonia solanacearum GMI	1
1248		gi|17545338|ref|NP_518740.1| transmembrane hydrogenase cytochrome B- type subun	1
1249		gi|17545348|ref|NP_518750.1| oxidoreductase cytochrome C552 precursor signal pe	1
1250		gi|17545362|ref|NP_518764.1| hypothetical protein RSc0643 [Ralstonia solanacear	1
1251		gi|17545413|ref|NP_518815.1| hypothetical protein RSc0694 [Ralstonia solanacear	1
1252		gi|17545438|ref|NP_518840.1| signal peptide protein [Ralstonia solanacearum GMI	1
1253		gi|17545448|ref|NP_518850.1| serine hydroxymethyltransferase [Ralstonia solanac	1
1254		gi|17545449|ref|NP_518851.1| oxidoreductase [Ralstonia solanacearum GMI1000]	1
1255		gi|17545470|ref|NP_518872.1| hypothetical protein RSc0751 [Ralstonia solanacear	1
1256		gi|17545477|ref|NP_518879.1| oxygenase oxidoreductase [Ralstonia solanacearum G	1
1257		gi|17545481|ref|NP_518883.1| hypothetical protein RSc0762 [Ralstonia solanacear	1
1258		gi|17545552|ref|NP_518954.1| hypothetical protein RSc0833 [Ralstonia solanacear	1
1259		gi|17545592|ref|NP_518994.1| bacteriophage-related transmembrane protein [Ralst	1
1260		gi|17545594|ref|NP_518996.1| transmembrane protein [Ralstonia solanacearum GMI1	1
1261		gi|17545610|ref|NP_519012.1| site-specific integrase/recombinase [Ralstonia sol	1
1262		gi|17545621|ref|NP_519023.1| signal peptide protein [Ralstonia solanacearum GMI	1
1263		gi|17545659|ref|NP_519061.1| ribosome-associated GTPase [Ralstonia solanacearum	1
1264		gi|17545688|ref|NP_519090.1| transmembrane protein [Ralstonia solanacearum GMI1	1
1265		gi|17545692|ref|NP_519094.1| amino-acid-binding periplasmic (PBP) ABC transport	1
1266		gi|17545705|ref|NP_519107.1| hypothetical protein RSc0986 [Ralstonia solanacear	1
1267		gi|17545708|ref|NP_519110.1| transcription regulator protein [Ralstonia solanac	1
1268		gi|17545726|ref|NP_519128.1| transcription regulator protein [Ralstonia solanac	1
1269		gi|17545732|ref|NP_519134.1| ribokinase [Ralstonia solanacearum GMI1000]	1
1270		gi|17545733|ref|NP_519135.1| transcriptional regulator [Ralstonia solanacearum	1
1271		gi|17545799|ref|NP_519201.1| hexuronate transporter transmembrane protein [Rals	1
1272		gi|17545826|ref|NP_519228.1| hypothetical protein RSc1107 [Ralstonia solanacear	1
1273		gi|17545867|ref|NP_519269.1| hypothetical protein RSc1148 [Ralstonia solanacear	1
1274		gi|17545873|ref|NP_519275.1| 2,5-diketo-D-gluconate reductase B [Ralstonia sola	1
1275		gi|17545901|ref|NP_519303.1| 50S ribosomal protein L31 type B [Ralstonia solana	1
1276		gi|17545904|ref|NP_519306.1| transcription regulator protein [Ralstonia solanac	1
1277		gi|17545905|ref|NP_519307.1| sigma-54 interacting transcription regulator prote	1
1278		gi|17545923|ref|NP_519325.1| stationary phase survival protein SurE [Ralstonia	1
1279		gi|17545926|ref|NP_519328.1| RNA polymerase sigma factor RpoS [Ralstonia solana	1
1280		gi|17545938|ref|NP_519340.1| GTP-binding protein EngA [Ralstonia solanacearum G	1
1281		gi|17545945|ref|NP_519347.1| adenylosuccinate synthetase [Ralstonia solanacearu	1
1282		gi|17546004|ref|NP_519406.1| hypothetical protein RSc1285 [Ralstonia solanacear	1
1283		gi|17546021|ref|NP_519423.1| hypothetical protein RSc1302 [Ralstonia solanacear	1
1284		gi|17546040|ref|NP_519442.1| polymixin resistance glycosyltransferase transmemb	1
1285		gi|17546047|ref|NP_519449.1| threonine synthase [Ralstonia solanacearum GMI1000	1
1286		gi|17546059|ref|NP_519461.1| aliphatic sulfonate ABC transporter transmembrane	1
1287	RSc1349 (SspH1)	gi|17546068|ref|NP_519470.1| hypothetical protein RSc1349 [Ralstonia solanacear	1
1288		gi|17546106|ref|NP_519508.1| GTP cyclohydrolase I [Ralstonia solanacearum GMI10	1
1289		gi|17546109|ref|NP_519511.1| succinyl-diaminopimelate desuccinylase [Ralstonia	1
1290		gi|17546137|ref|NP_519539.1| ribonuclease HII [Ralstonia solanacearum GMI1000]	1
1291		gi|17546171|ref|NP_519573.1| L,D-carboxypeptidase A [Ralstonia solanacearum GMI	1
1292		gi|17546180|ref|NP_519582.1| transporter transmembrane protein [Ralstonia solan	1
1293		gi|17546183|ref|NP_519585.1| hypothetical protein RSc1464 [Ralstonia solanacear	1
1294		gi|17546226|ref|NP_519628.1| hypothetical protein RSc1507 [Ralstonia solanacear	1
1295		gi|17546244|ref|NP_519646.1| ribosomal RNA large subunit methyltransferase J [R	1
1296		gi|17546245|ref|NP_519647.1| ATP-dependent zinc metallopeptidase [Ralstonia sol	1
1297		gi|17546286|ref|NP_519688.1| electron transfer flavoprotein-ubiquinone oxidored	1
1298		gi|17546300|ref|NP_519702.1| phenylalanyl-tRNA synthetase subunit alpha [Ralsto	1
1299		gi|17546339|ref|NP_519741.1| hypothetical protein RSc1620 [Ralstonia solanacear	1
1300		gi|17546346|ref|NP_519748.1| hypothetical protein RSc1627 [Ralstonia solanacear	1
1301		gi|17546350|ref|NP_519752.1| poly-beta-hydroxybutyrate polymerase transmembrane	1
1302		gi|17546355|ref|NP_519757.1| hypothetical protein RSc1636 [Ralstonia solanacear	1
1303		gi|17546359|ref|NP_519761.1| phosphoserine phosphatase [Ralstonia solanacearum	1
1304		gi|17546379|ref|NP_519781.1| hypothetical protein RSc1660 [Ralstonia solanacear	1
1305		gi|17546390|ref|NP_519792.1| TIS1421-transposase B [Ralstonia solanacearum GMI1	1
1306		gi|17546392|ref|NP_519794.1| hypothetical protein RSc1673 [Ralstonia solanacear	1
1307		gi|17546396|ref|NP_519798.1| hypothetical protein RSc1677 [Ralstonia solanacear	1
1308		gi|17546410|ref|NP_519812.1| phage HK97 GP17-like protein [Ralstonia solanacear	1
1309		gi|17546457|ref|NP_519859.1| ABC transporter ATP-binding protein [Ralstonia sol	1
1310		gi|17546460|ref|NP_519862.1| hypothetical protein RSc1741 [Ralstonia solanacear	1
1311		gi|17546469|ref|NP_519871.1| Leu/Ile/Val-binding precursor signal peptide prote	1
1312		gi|17546475|ref|NP_519877.1| exo-poly-galacturonase signal peptide protein [Ral	1
1313		gi|17546490|ref|NP_519892.1| NAD-dependent 4-hydroxybutyrate dehydrogenase oxid	1
1314		gi|17546495|ref|NP_519897.1| hypothetical protein RSc1776 [Ralstonia solanacear	1
1315		gi|17546521|ref|NP_519923.1| transcription regulator protein [Ralstonia solanac	1
1316		gi|17546526|ref|NP_519928.1| siderophore receptor protein [Ralstonia solanacear	1
1317		gi|17546546|ref|NP_519948.1| 4-hydroxybenzoyl-COA thioesterase [Ralstonia solan	1
1318		gi|17546564|ref|NP_519966.1| hypothetical protein RSc1845 [Ralstonia solanacear	1
1319		gi|17546568|ref|NP_519970.1| transcription regulator protein [Ralstonia solanac	1
1320		gi|17546576|ref|NP_519978.1| transcription regulator protein [Ralstonia solanac	1
1321		gi|17546603|ref|NP_520005.1| oligopeptide ATP-binding ABC transporter protein [	1
1322		gi|17546616|ref|NP_520018.1| hypothetical protein RSc1897 [Ralstonia solanacear	1
1323		gi|17546618|ref|NP_520020.1| hypothetical protein RSc1899 [Ralstonia solanacear	1
1324		gi|17546623|ref|NP_520025.1| transcriptional activator transcription regulator	1
1325		gi|17546646|ref|NP_520048.1| hypothetical protein RSc1927 [Ralstonia solanacear	1
1326		gi|17546666|ref|NP_520068.1| hypothetical protein RSc1947 [Ralstonia solanacear	1
1327		gi|17546692|ref|NP_520094.1| osmotically inducible lipoprotein B1 transmembrane	1
1328		gi|17546695|ref|NP_520097.1| amidophosphoribosyltransferase [Ralstonia solanace	1
1329		gi|17546706|ref|NP_520108.1| aspartate-semialdehyde dehydrogenase [Ralstonia so	1
1330		gi|17546711|ref|NP_520113.1| hypothetical protein RSc1992 [Ralstonia solanacear	1
1331		gi|17546730|ref|NP_520132.1| aminotransferase [Ralstonia solanacearum GMI1000]	1
1332		gi|17546734|ref|NP_520136.1| phosphoglycerate mutase [Ralstonia solanacearum GM	1
1333		gi|17546803|ref|NP_520205.1| hypothetical protein RSc2084 [Ralstonia solanacear	1
1334		gi|17546805|ref|NP_520207.1| transcription regulator protein [Ralstonia solanac	1
1335		gi|17546854|ref|NP_520256.1| hypothetical protein RSc2135 [Ralstonia solanacear	1
1336		gi|17546878|ref|NP_520280.1| ribonuclease PH [Ralstonia solanacearum GMI1000]	1
1337		gi|17546891|ref|NP_520293.1| drug transport transmembrane protein [Ralstonia so	1
1338		gi|17546907|ref|NP_520309.1| uracil phosphoribosyltransferase [Ralstonia solana	1
1339		gi|17546920|ref|NP_520322.1| signal peptide protein [Ralstonia solanacearum GMI	1
1340		gi|17546943|ref|NP_520345.1| dioxygenase alpha subunit [Ralstonia solanacearum	1
1341		gi|17547004|ref|NP_520406.1| signal peptide protein [Ralstonia solanacearum GMI	1
1342		gi|17547075|ref|NP_520477.1| bifunctional uroporphyrinogen-III synthetase/uropo	1
1343		gi|17547088|ref|NP_520490.1| signal peptide protein [Ralstonia solanacearum GMI	1
1344		gi|17547121|ref|NP_520523.1| hypothetical protein RSc2402 [Ralstonia solanacear	1
1345		gi|17547155|ref|NP_520557.1| hypothetical protein RSc2436 [Ralstonia solanacear	1
1346		gi|17547157|ref|NP_520559.1| amino acid ABC transporter ATP-binding protein [Ra	1
1347		gi|17547163|ref|NP_520565.1| DNA repair protein RadC [Ralstonia solanacearum GM	1
1348		gi|17547174|ref|NP_520576.1| response regulator VSRC transcription regulator pr	1
1349		gi|17547192|ref|NP_520594.1| hypothetical protein RSc2473 [Ralstonia solanacear	1
1350		gi|17547194|ref|NP_520596.1| hypothetical protein RSc2475 [Ralstonia solanacear	1
1351		gi|17547198|ref|NP_520600.1| bacteriophage-like protein [Ralstonia solanacearum	1
1352		gi|17547227|ref|NP_520629.1| hypothetical protein RSc2508 [Ralstonia solanacear	1
1353		gi|17547255|ref|NP_520657.1| transmembrane aldehyde dehydrogenase oxidoreductas	1
1354		gi|17547267|ref|NP_520669.1| inosine-uridine preferring nucleoside hydrolase tr	1
1355		gi|17547303|ref|NP_520705.1| conjugal transfer protein TrbB [Ralstonia solanace	1
1356		gi|17547313|ref|NP_520715.1| glutathione-S-transferase [Ralstonia solanacearum	1
1357		gi|17547314|ref|NP_520716.1| hypothetical protein RSc2595 [Ralstonia solanacear	1
1358		gi|17547318|ref|NP_520720.1| hypothetical protein RSc2599 [Ralstonia solanacear	1
1359		gi|17547323|ref|NP_520725.1| hypothetical protein RSc2604 [Ralstonia solanacear	1
1360		gi|17547332|ref|NP_520734.1| hypothetical protein RSc2613 [Ralstonia solanacear	1
1361		gi|17547337|ref|NP_520739.1| homologue to gene 32 protein of F plasmid [Ralston	1
1362		gi|17547338|ref|NP_520740.1| hypothetical protein RSc2619 [Ralstonia solanacear	1
1363		gi|17547371|ref|NP_520773.1| lipoprotein [Ralstonia solanacearum GMI1000]	1
1364		gi|17547378|ref|NP_520780.1| TldD protein [Ralstonia solanacearum GMI1000]	1
1365		gi|17547384|ref|NP_520786.1| transcription regulator protein [Ralstonia solanac	1
1366		gi|17547421|ref|NP_520823.1| cold shock-like transcription regulator protein [R	1
1367		gi|17547445|ref|NP_520847.1| multidrug ABC transporter transmembrane protein [R	1
1368		gi|17547463|ref|NP_520865.1| leucyl-tRNA synthetase [Ralstonia solanacearum GMI	1
1369		gi|17547465|ref|NP_520867.1| lipoprotein transmembrane [Ralstonia solanacearum	1
1370		gi|17547500|ref|NP_520902.1| hypothetical protein RSc2781 [Ralstonia solanacear	1
1371		gi|17547504|ref|NP_520906.1| 3-dehydroquinate dehydratase [Ralstonia solanacear	1
1372		gi|17547509|ref|NP_520911.1| thiol peroxidase-scavengase P20 oxidoreductase [Ra	1
1373		gi|17547515|ref|NP_520917.1| hemagglutinin-related transmembrane protein [Ralst	1
1374		gi|17547547|ref|NP_520949.1| hypothetical protein RSc2828 [Ralstonia solanacear	1
1375		gi|17547553|ref|NP_520955.1| preprotein translocase subunit SecA [Ralstonia sol	1
1376		gi|17547554|ref|NP_520956.1| transmembrane protein [Ralstonia solanacearum GMI1	1
1377		gi|17547559|ref|NP_520961.1| cell division protein FtsA [Ralstonia solanacearum	1
1378		gi|17547563|ref|NP_520965.1| N-acetylglucosaminyl transferase [Ralstonia solana	1
1379		gi|17547575|ref|NP_520977.1| metabolite transport protein [Ralstonia solanacear	1
1380		gi|17547586|ref|NP_520988.1| oligopeptide ATP-binding ABC transporter protein [	1
1381		gi|17547594|ref|NP_520996.1| phenylacetyl-CoA-ligase [Ralstonia solanacearum GM	1
1382		gi|17547614|ref|NP_521016.1| signal peptide protein [Ralstonia solanacearum GMI	1
1383		gi|17547616|ref|NP_521018.1| hypothetical protein RSc2897 [Ralstonia solanacear	1
1384		gi|17547617|ref|NP_521019.1| translation-associated GTPase [Ralstonia solanacea	1
1385		gi|17547622|ref|NP_521024.1| methyltransferase [Ralstonia solanacearum GMI1000]	1
1386		gi|17547630|ref|NP_521032.1| hypothetical protein RSc2911 [Ralstonia solanacear	1
1387		gi|17547632|ref|NP_521034.1| ABC transporter ATP-binding protein [Ralstonia sol	1
1388		gi|17547670|ref|NP_521072.1| histidinol-phosphate aminotransferase [Ralstonia s	1
1389		gi|17547678|ref|NP_521080.1| lipoprotein precursor (VACJ) transmembrane [Ralsto	1
1390		gi|17547682|ref|NP_521084.1| hypothetical protein RSc2963 [Ralstonia solanacear	1
1391		gi|17547687|ref|NP_521089.1| deoxyguanosinetriphosphate triphosphohydrolase-lik	1
1392		gi|17547690|ref|NP_521092.1| fimbrial type-4 assembly signal peptide protein [R	1
1393		gi|17547691|ref|NP_521093.1| fimbrial type-4 assembly lipoprotein [Ralstonia so	1
1394		gi|17547705|ref|NP_521107.1| cytochrome C-type biogenesis transmembrane protein	1
1395		gi|17547713|ref|NP_521115.1| 30S ribosomal protein S4 [Ralstonia solanacearum G	1
1396		gi|17547719|ref|NP_521121.1| 50S ribosomal protein L15 [Ralstonia solanacearum	1
1397		gi|17547730|ref|NP_521132.1| 50S ribosomal protein L29 [Ralstonia solanacearum	1
1398		gi|17547744|ref|NP_521146.1| ATP-dependent DNA helicase [Ralstonia solanacearum	1
1399		gi|17547749|ref|NP_521151.1| signal peptide protein [Ralstonia solanacearum GMI	1
1400		gi|17547752|ref|NP_521154.1| DNA-directed RNA polymerase subunit beta' [Ralston	1
1401		gi|17547770|ref|NP_521172.1| signal peptide protein [Ralstonia solanacearum GMI	1
1402		gi|17547771|ref|NP_521173.1| ATP:glycerol 3-phosphotransferase [Ralstonia solan	1
1403		gi|17547787|ref|NP_521189.1| hypothetical protein RSc3068 [Ralstonia solanacear	1
1404		gi|17547862|ref|NP_521264.1| hypothetical protein RSc3143 [Ralstonia solanacear	1
1405		gi|17547895|ref|NP_521297.1| hypothetical protein RSc3176 [Ralstonia solanacear	1
1406		gi|17547901|ref|NP_521303.1| activation/secretion signal peptide protein [Ralst	1
1407		gi|17547903|ref|NP_521305.1| hypothetical protein RSc3184 [Ralstonia solanacear	1
1408		gi|17547944|ref|NP_521346.1| hypothetical protein RSc3225 [Ralstonia solanacear	1
1409		gi|17547962|ref|NP_521364.1| hypothetical protein RSc3245 [Ralstonia solanacear	1
1410		gi|17547976|ref|NP_521378.1| hypothetical protein RSc3259 [Ralstonia solanacear	1
1411		gi|17547985|ref|NP_521387.1| hypothetical protein RSc3268 [Ralstonia solanacear	1
1412		gi|17547990|ref|NP_521392.1| hypothetical protein RSc3273 [Ralstonia solanacear	1
1413		gi|17547999|ref|NP_521401.1| hydroxypyruvate isomerase [Ralstonia solanacearum	1
1414		gi|17548058|ref|NP_521460.1| transmembrane ABC transporter protein [Ralstonia s	1
1415		gi|17548080|ref|NP_521482.1| 2',3'-cyclic-nucleotide 2'-phosphodiesterase precu	1
1416		gi|17548107|ref|NP_521509.1| porin signal peptide protein [Ralstonia solanacear	1
1417		gi|17548147|ref|NP_521549.1| VGR-related protein [Ralstonia solanacearum GMI100	1
1418		gi|17548154|ref|NP_521556.1| hypothetical protein RSc3437 [Ralstonia solanacear	1
1419		gi|17548157|ref|NP_521559.1| DNA gyrase subunit B [Ralstonia solanacearum GMI10	1
1420		gi|17548232|ref|NP_521572.1| putative signal peptide protein [Ralstonia solanac	1
1421		gi|17548233|ref|NP_521573.1| hypothetical protein RS01984 [Ralstonia solanacear	1
1422		gi|17548241|ref|NP_521581.1| putative voltage-gated ClC-type chloride channel C	1
1423		gi|17548260|ref|NP_521600.1| hypothetical protein RS02014 [Ralstonia solanacear	1
1424		gi|17548263|ref|NP_521603.1| TIS1421-transposase protein B [Ralstonia solanacea	1
1425		gi|17548264|ref|NP_521604.1| hypothetical protein RS02018 [Ralstonia solanacear	1
1426		gi|17548280|ref|NP_521620.1| hypothetical protein RS02034 [Ralstonia solanacear	1
1427		gi|17548289|ref|NP_521629.1| transcriptional regulator transcription regulator	1
1428		gi|17548292|ref|NP_521632.1| hypothetical protein RS02048 [Ralstonia solanacear	1
1429		gi|17548301|ref|NP_521641.1| hypothetical protein RS05541 [Ralstonia solanacear	1
1430		gi|17548304|ref|NP_521644.1| hypothetical protein RS05555 [Ralstonia solanacear	1
1431		gi|17548314|ref|NP_521654.1| TIS1421-transposase protein B [Ralstonia solanacea	1
1432		gi|17548318|ref|NP_521658.1| ankyrin repeat-containing protein [Ralstonia solan	1
1433		gi|17548326|ref|NP_521666.1| hypothetical protein RS03018 [Ralstonia solanacear	1
1434		gi|17548329|ref|NP_521669.1| putative transcription regulator protein [Ralstoni	1
1435		gi|17548333|ref|NP_521673.1| putative carbonic anhydrase protein [Ralstonia sol	1
1436		gi|17548346|ref|NP_521686.1| hypothetical protein RS02997 [Ralstonia solanacear	1
1437		gi|17548372|ref|NP_521712.1| putative RHS-related protein [Ralstonia solanacear	1
1438	RSp0160	gi|17548381|ref|NP_521721.1| hypothetical protein RS05518 [Ralstonia solanacear	1
1439		gi|17548433|ref|NP_521773.1| dioxygenase signal peptide protein [Ralstonia sola	1
1440		gi|17548446|ref|NP_521786.1| p-hydroxycinnamoyl CoA hydratase/lyase [Ralstonia	1
1441		gi|17548448|ref|NP_521788.1| feruloyl-CoA synthase [Ralstonia solanacearum GMI1	1
1442		gi|17548460|ref|NP_521800.1| glycogen branching enzyme [Ralstonia solanacearum	1
1443		gi|17548461|ref|NP_521801.1| hypothetical protein RS05183 [Ralstonia solanacear	1
1444		gi|17548468|ref|NP_521808.1| ferric uptake transcriptional (FUR)-like transcrip	1
1445		gi|17548479|ref|NP_521819.1| hypothetical protein RS03708 [Ralstonia solanacear	1
1446		gi|17548495|ref|NP_521835.1| gamma-glutamyltranspeptidase signal peptide protei	1
1447		gi|17548506|ref|NP_521846.1| transcription regulator protein [Ralstonia solanac	1
1448		gi|17548507|ref|NP_521847.1| putative hemin-binding outer membrane transmembran	1
1449		gi|17548514|ref|NP_521854.1| hypothetical protein RS03673 [Ralstonia solanacear	1
1450		gi|17548522|ref|NP_521862.1| TIS1421-transposase protein A [Ralstonia solanacea	1
1451		gi|17548529|ref|NP_521869.1| transcription regulator protein [Ralstonia solanac	1
1452		gi|17548536|ref|NP_521876.1| transmembrane sensor kinase transcription regulato	1
1453		gi|17548545|ref|NP_521885.1| dehydrogenase, small chain oxidoreductase protein	1
1454		gi|17548624|ref|NP_521964.1| putative signal peptide protein [Ralstonia solanac	1
1455		gi|17548654|ref|NP_521994.1| hypothetical protein RS00892 [Ralstonia solanacear	1
1456		gi|17548655|ref|NP_521995.1| transcription regulator protein [Ralstonia solanac	1
1457		gi|17548661|ref|NP_522001.1| putative multidrug resistance transmembrane protei	1
1458		gi|17548684|ref|NP_522024.1| hypothetical protein RS00951 [Ralstonia solanacear	1
1459		gi|17548685|ref|NP_522025.1| GSPE-like protein [Ralstonia solanacearum GMI1000]	1
1460		gi|17548719|ref|NP_522059.1| hypothetical protein RS00376 [Ralstonia solanacear	1
1461		gi|17548732|ref|NP_522072.1| putative signal peptide protein [Ralstonia solanac	1
1462		gi|17548739|ref|NP_522079.1| putative VGR-related protein [Ralstonia solanacear	1
1463		gi|17548748|ref|NP_522088.1| hypothetical protein RS00406 [Ralstonia solanacear	1
1464		gi|17548754|ref|NP_522094.1| hypothetical protein RS00413 [Ralstonia solanacear	1
1465		gi|17548755|ref|NP_522095.1| putative ICC protein [Ralstonia solanacearum GMI10	1
1466		gi|17548759|ref|NP_522099.1| hypothetical protein RS00417 [Ralstonia solanacear	1
1467		gi|17548789|ref|NP_522129.1| hypothetical protein RS03910 [Ralstonia solanacear	1
1468		gi|17548796|ref|NP_522136.1| hypothetical protein RS03904 [Ralstonia solanacear	1
1469		gi|17548803|ref|NP_522143.1| IS1421-transposase protein B [Ralstonia solanacear	1
1470		gi|17548825|ref|NP_522165.1| phenylacetate-CoA oxygenase subunit PaaA [Ralstoni	1
1471		gi|17548837|ref|NP_522177.1| cob(I)yrinic acid a,c-diamide adenosyltransferase	1
1472		gi|17548843|ref|NP_522183.1| cobalamin biosynthesis D transmembrane protein [Ra	1
1473		gi|17548903|ref|NP_522243.1| trimethylamine dehydrogenase oxidoreductase protei	1
1474		gi|17548924|ref|NP_522264.1| hypothetical protein RS01746 [Ralstonia solanacear	1
1475		gi|17548931|ref|NP_522271.1| hypothetical protein RS01739 [Ralstonia solanacear	1
1476		gi|17548934|ref|NP_522274.1| hypothetical protein RS01736 [Ralstonia solanacear	1
1477		gi|17548950|ref|NP_522290.1| hypothetical protein RS01699 [Ralstonia solanacear	1
1478		gi|17548972|ref|NP_522312.1| hypothetical protein RS01957 [Ralstonia solanacear	1
1479		gi|17548979|ref|NP_522319.1| hypothetical protein RS01950 [Ralstonia solanacear	1
1480		gi|17548995|ref|NP_522335.1| hypothetical protein RS01934 [Ralstonia solanacear	1
1481		gi|17549004|ref|NP_522344.1| hypothetical protein RS01924 [Ralstonia solanacear	1
1482		gi|17549033|ref|NP_522373.1| putative transmembrane protein [Ralstonia solanace	1
1483		gi|17549045|ref|NP_522385.1| putative gluconolactonase precursor (D-glucono-DEL	1
1484		gi|17549081|ref|NP_522421.1| type III secretion system protein [Ralstonia solan	1
1485		gi|17549092|ref|NP_522432.1| hypothetical protein RSp0871 [Ralstonia solanacear	1
1486		gi|17549105|ref|NP_522445.1| hypothetical protein RS01655 [Ralstonia solanacear	1
1487		gi|17549122|ref|NP_522462.1| hypothetical protein RS01672 [Ralstonia solanacear	1
1488		gi|17549141|ref|NP_522481.1| hypothetical protein RS01691 [Ralstonia solanacear	1
1489		gi|17549150|ref|NP_522490.1| putative signal peptide protein [Ralstonia solanac	1
1490		gi|17549157|ref|NP_522497.1| hypothetical protein RS05397 [Ralstonia solanacear	1
1491		gi|17549172|ref|NP_522512.1| NAD(P) transhydrogenase subunit beta [Ralstonia so	1
1492		gi|17549179|ref|NP_522519.1| cell morphogenesis/cell wall metabolism regulator	1
1493		gi|17549212|ref|NP_522552.1| TIS1421-transposase protein B [Ralstonia solanacea	1
1494		gi|17549220|ref|NP_522560.1| hypothetical protein RS02332 [Ralstonia solanacear	1
1495		gi|17549227|ref|NP_522567.1| putative eps aminotransferase protein [Ralstonia s	1
1496		gi|17549228|ref|NP_522568.1| putative acetyl transferase protein [Ralstonia sol	1
1497		gi|17549249|ref|NP_522589.1| hypothetical protein RS02365 [Ralstonia solanacear	1
1498		gi|17549254|ref|NP_522594.1| hypothetical protein RS02370 [Ralstonia solanacear	1
1499		gi|17549324|ref|NP_522664.1| hypothetical protein RS02609 [Ralstonia solanacear	1
1500		gi|17549331|ref|NP_522671.1| transcription regulator protein [Ralstonia solanac	1
1501		gi|17549339|ref|NP_522679.1| hypothetical protein RS05501 [Ralstonia solanacear	1
1502		gi|17549347|ref|NP_522687.1| transcription regulator protein [Ralstonia solanac	1
1503		gi|17549352|ref|NP_522692.1| hypothetical protein RS05485 [Ralstonia solanacear	1
1504		gi|17549359|ref|NP_522699.1| hypothetical protein RS05481 [Ralstonia solanacear	1
1505		gi|17549367|ref|NP_522707.1| transcription regulator protein [Ralstonia solanac	1
1506		gi|17549378|ref|NP_522718.1| transcription regulator protein [Ralstonia solanac	1
1507		gi|17549379|ref|NP_522719.1| hypothetical protein RS05427 [Ralstonia solanacear	1
1508		gi|17549382|ref|NP_522722.1| two-component response regulator transcription reg	1
1509		gi|17549385|ref|NP_522725.1| putative transcription regulator protein [Ralstoni	1
1510		gi|17549409|ref|NP_522749.1| hypothetical protein RS03132 [Ralstonia solanacear	1
1511	RSp1212	gi|17549433|ref|NP_522773.1| hypothetical protein RS03156 [Ralstonia solanacear	1
1512		gi|17549450|ref|NP_522790.1| hypothetical protein RS03173 [Ralstonia solanacear	1
1513		gi|17549480|ref|NP_522820.1| signal peptide protein [Ralstonia solanacearum GMI	1
1514		gi|17549497|ref|NP_522837.1| transporter transmembrane protein [Ralstonia solan	1
1515		gi|17549510|ref|NP_522850.1| putative type-4 fimbrial biogenesis PILV transmemb	1
1516		gi|17549526|ref|NP_522866.1| putative transmembrane protein [Ralstonia solanace	1
1517		gi|17549535|ref|NP_522875.1| 4-hydroxyphenylpyruvate dioxygenase oxidoreductase	1
1518		gi|17549541|ref|NP_522881.1| hypothetical protein RS05655 [Ralstonia solanacear	1
1519		gi|17549557|ref|NP_522897.1| hypothetical protein RS04763 [Ralstonia solanacear	1
1520		gi|17549566|ref|NP_522906.1| 4-hydroxyphenylpyruvate dioxygenase oxidoreductase	1
1521		gi|17549572|ref|NP_522912.1| hypothetical protein RS04783 [Ralstonia solanacear	1
1522		gi|17549676|ref|NP_523016.1| putative cation-efflux system signal peptide prote	1
1523		gi|17549681|ref|NP_523021.1| hypothetical protein RS03082 [Ralstonia solanacear	1
1524		gi|17549688|ref|NP_523028.1| putative tyrosine specific protein phosphatase [Ra	1
1525		gi|17549704|ref|NP_523044.1| hypothetical protein RS03058 [Ralstonia solanacear	1
1526		gi|17549720|ref|NP_523060.1| signal peptide protein [Ralstonia solanacearum GMI	1
1527		gi|17549738|ref|NP_523078.1| putative sulfate transporter transmembrane protein	1
1528		gi|17549752|ref|NP_523092.1| lipoprotein [Ralstonia solanacearum GMI1000]	1
1529		gi|17549768|ref|NP_523108.1| hypothetical protein RS02105 [Ralstonia solanacear	1
1530		gi|17549779|ref|NP_523119.1| phosphogluconate dehydratase [Ralstonia solanacear	1
1531		gi|17549784|ref|NP_523124.1| cytochrome C oxidase polypeptide I [Ralstonia sola	1
1532		gi|17549788|ref|NP_523128.1| putative lipoprotein transmembrane [Ralstonia sola	1
1533		gi|17549796|ref|NP_523136.1| amino-acid transmembrane ABC transporter protein [	1
1534		gi|17549811|ref|NP_523151.1| leucine-specific binding precursor transmembrane p	1
1535		gi|17549823|ref|NP_523163.1| hypothetical protein RS02161 [Ralstonia solanacear	1
1536		gi|17549832|ref|NP_523172.1| 2,4-dihydroxyhept-2-ene-1,7-dioic acid aldolase pr	1
1537		gi|17549835|ref|NP_523175.1| transcription regulator transcription regulator pr	1
1538		gi|17549878|ref|NP_523218.1| acyl-carrier-protein [Ralstonia solanacearum GMI10	1
1539		gi|17549882|ref|NP_523222.1| hypothetical protein RS02222 [Ralstonia solanacear	1
1540		gi|17549892|ref|NP_523232.1| lipoprotein transmembrane [Ralstonia solanacearum	1
1541		gi|17549896|ref|NP_523236.1| putative prolin-rich protein [Ralstonia solanacear	1
1542		gi|17544730|ref|NP_518132.1| acriflavin resistance lipoprotein A precursor [Ral	2
1543		gi|17544746|ref|NP_518148.1| homoserine O-acetyltransferase [Ralstonia solanace	2
1544		gi|17544996|ref|NP_518398.1| carbonic anhydrase [Ralstonia solanacearum GMI1000	2
1545		gi|17545060|ref|NP_518462.1| signal peptide protein [Ralstonia solanacearum GMI	2
1546		gi|17545092|ref|NP_518494.1| lipoprotein [Ralstonia solanacearum GMI1000]	2
1547		gi|17545237|ref|NP_518639.1| dimethyladenosine transferase [Ralstonia solanacea	2
1548		gi|17545334|ref|NP_518736.1| transcription regulator protein [Ralstonia solanac	2
1549		gi|17545341|ref|NP_518743.1| ATP-dependent RNA helicase DbpA [Ralstonia solanac	2
1550		gi|17545357|ref|NP_518759.1| hypothetical protein RSc0638 [Ralstonia solanacear	2
1551		gi|17545369|ref|NP_518771.1| tight adherence TadC-related transmembrane protein	2
1552		gi|17545370|ref|NP_518772.1| tight adherence TadB-related transmembrane protein	2
1553		gi|17545385|ref|NP_518787.1| glutamate-1-semialdehyde 2,1-aminomutase [Ralstoni	2
1554		gi|17545457|ref|NP_518859.1| signal peptide protein [Ralstonia solanacearum GMI	2
1555		gi|17545546|ref|NP_518948.1| hypothetical protein RSc0827 [Ralstonia solanacear	2
1556		gi|17545576|ref|NP_518978.1| bacteriophage-like protein [Ralstonia solanacearum	2
1557		gi|17545727|ref|NP_519129.1| poly[D(-)-3-hydroxybutyrate] depolymerase [Ralston	2
1558		gi|17545792|ref|NP_519194.1| two-component system response regulator transcript	2
1559		gi|17545807|ref|NP_519209.1| ferredoxin subunit of A ring-hydroxylating dioxyge	2
1560		gi|17545940|ref|NP_519342.1| hypothetical protein RSc1221 [Ralstonia solanacear	2
1561		gi|17545996|ref|NP_519398.1| cytochrome C oxidase subunit II [Ralstonia solanac	2
1562		gi|17546010|ref|NP_519412.1| tRNA pseudouridine synthase B [Ralstonia solanacea	2
1563		gi|17546055|ref|NP_519457.1| sulfate-binding precursor signal peptide protein [	2
1564		gi|17546072|ref|NP_519474.1| acetolactate synthase 2 catalytic subunit [Ralston	2
1565		gi|17546078|ref|NP_519480.1| hypothetical protein RSc1359 [Ralstonia solanacear	2
1566		gi|17546081|ref|NP_519483.1| 2-haloalkanoic acid dehalogenase [Ralstonia solana	2
1567		gi|17546119|ref|NP_519521.1| transmembrane protein [Ralstonia solanacearum GMI1	2
1568		gi|17546202|ref|NP_519604.1| hypothetical protein RSc1483 [Ralstonia solanacear	2
1569		gi|17546230|ref|NP_519632.1| hypothetical protein RSc1511 [Ralstonia solanacear	2
1570		gi|17546295|ref|NP_519697.1| GTP pyrophosphokinase [Ralstonia solanacearum GMI1	2
1571		gi|17546314|ref|NP_519716.1| oligopeptidase A [Ralstonia solanacearum GMI1000]	2
1572		gi|17546358|ref|NP_519760.1| cystathionine beta-lyase [Ralstonia solanacearum G	2
1573		gi|17546441|ref|NP_519843.1| phosphoribosylformylglycinamidine synthase [Ralsto	2
1574		gi|17546477|ref|NP_519879.1| lysine-specific permease transmembrane protein [Ra	2
1575		gi|17546486|ref|NP_519888.1| hypothetical protein RSc1767 [Ralstonia solanacear	2
1576		gi|17546493|ref|NP_519895.1| hypothetical protein RSc1774 [Ralstonia solanacear	2
1577		gi|17546539|ref|NP_519941.1| hypothetical protein RSc1820 [Ralstonia solanacear	2
1578		gi|17546565|ref|NP_519967.1| hypothetical protein RSc1846 [Ralstonia solanacear	2
1579		gi|17546591|ref|NP_519993.1| DNA polymerase III subunit epsilon [Ralstonia sola	2
1580		gi|17546672|ref|NP_520074.1| hypothetical protein RSc1953 [Ralstonia solanacear	2
1581		gi|17546736|ref|NP_520138.1| hypothetical protein RSc2017 [Ralstonia solanacear	2
1582		gi|17546766|ref|NP_520168.1| hypothetical protein RSc2047 [Ralstonia solanacear	2
1583		gi|17546836|ref|NP_520238.1| transcription regulator protein [Ralstonia solanac	2
1584		gi|17546925|ref|NP_520327.1| hypothetical protein RSc2206 [Ralstonia solanacear	2
1585		gi|17547108|ref|NP_520510.1| partition-related protein [Ralstonia solanacearum	2
1586		gi|17547259|ref|NP_520661.1| hypothetical protein RSc2540 [Ralstonia solanacear	2
1587		gi|17547281|ref|NP_520683.1| hypothetical protein RSc2562 [Ralstonia solanacear	2
1588		gi|17547312|ref|NP_520714.1| carboxylesterase [Ralstonia solanacearum GMI1000]	2
1589		gi|17547383|ref|NP_520785.1| D-lactate dehydrogenase (cytochrome) oxidoreductas	2
1590		gi|17547437|ref|NP_520839.1| signal peptide protein [Ralstonia solanacearum GMI	2
1591		gi|17547456|ref|NP_520858.1| two component response regulator transcription reg	2
1592		gi|17547641|ref|NP_521043.1| outer membrane receptor signal peptide protein [Ra	2
1593		gi|17547668|ref|NP_521070.1| hypothetical protein RSc2949 [Ralstonia solanacear	2
1594		gi|17547707|ref|NP_521109.1| GTPase EngB [Ralstonia solanacearum GMI1000]	2
1595		gi|17547766|ref|NP_521168.1| ABC transporter ATP-binding protein [Ralstonia sol	2
1596		gi|17547793|ref|NP_521195.1| hypothetical protein RSc3074 [Ralstonia solanacear	2
1597		gi|17547810|ref|NP_521212.1| outer membrane porin signal peptide protein [Ralst	2
1598		gi|17547846|ref|NP_521248.1| ethanolamine ammonia-lyase heavy chain protein [Ra	2
1599		gi|17547942|ref|NP_521344.1| hypothetical protein RSc3223 [Ralstonia solanacear	2
1600		gi|17548225|ref|NP_521565.1| putative partitioning protein [Ralstonia solanacea	2
1601		gi|17548237|ref|NP_521577.1| amino-acid ATP-binding ABC transporter protein [Ra	2
1602		gi|17548261|ref|NP_521601.1| hypothetical protein RS02015 [Ralstonia solanacear	2
1603		gi|17548270|ref|NP_521610.1| sarcosine oxidase subunit gamma [Ralstonia solanac	2
1604		gi|17548299|ref|NP_521639.1| hypothetical protein RS05543 [Ralstonia solanacear	2
1605		gi|17548483|ref|NP_521823.1| glucan biosynthesis protein D [Ralstonia solanacea	2
1606		gi|17548511|ref|NP_521851.1| putative outer membrane CHANEL lipoprotein [Ralsto	2
1607		gi|17548543|ref|NP_521883.1| 2-isopropylmalate synthase [Ralstonia solanacearum	2
1608		gi|17548574|ref|NP_521914.1| hypothetical protein RS00757 [Ralstonia solanacear	2
1609		gi|17548666|ref|NP_522006.1| NADH-dependent flavin oxidoreductase oxidoreductas	2
1610		gi|17548676|ref|NP_522016.1| rhs-related protein [Ralstonia solanacearum GMI100	2
1611		gi|17548863|ref|NP_522203.1| peptide synthetase protein [Ralstonia solanacearum	2
1612		gi|17548886|ref|NP_522226.1| magnesium/cobalt transporter CorA [Ralstonia solan	2
1613		gi|17548918|ref|NP_522258.1| dehydrogenase/reductase oxidoreductase protein [Ra	2
1614		gi|17548957|ref|NP_522297.1| putative transmembrane protein [Ralstonia solanace	2
1615		gi|17548960|ref|NP_522300.1| hypothetical protein RS01969 [Ralstonia solanacear	2
1616		gi|17549011|ref|NP_522351.1| putative hydrolase protein [Ralstonia solanacearum	2
1617		gi|17549020|ref|NP_522360.1| hypothetical protein RS01908 [Ralstonia solanacear	2
1618	RSp0885	gi|17549106|ref|NP_522446.1| hypothetical protein RS01656 [Ralstonia solanacear	2
1619		gi|17549134|ref|NP_522474.1| hypothetical protein RS01685 [Ralstonia solanacear	2
1620		gi|17549142|ref|NP_522482.1| hypothetical protein RS01692 [Ralstonia solanacear	2
1621		gi|17549209|ref|NP_522549.1| hypothetical protein RS02320 [Ralstonia solanacear	2
1622		gi|17549269|ref|NP_522609.1| putative formate dehydrogenase oxidoreductase prot	2
1623		gi|17549455|ref|NP_522795.1| putative transferase protein [Ralstonia solanacear	2
1624		gi|17549507|ref|NP_522847.1| putative type-4 fimbrial biogenesis pily1-related	2
1625		gi|17549532|ref|NP_522872.1| hypothetical protein RS05664 [Ralstonia solanacear	2
1626		gi|17549547|ref|NP_522887.1| putative efflux PUMP antibiotic resistance transme	2
1627		gi|17549578|ref|NP_522918.1| putative efflux PUMP antibiotic resistance transme	2
1628		gi|17549609|ref|NP_522949.1| flagellar biosynthesis sigma factor [Ralstonia sol	2
1629		gi|17549624|ref|NP_522964.1| chemotaxis protein methyltransferase [Ralstonia so	2
1630		gi|17549744|ref|NP_523084.1| hypothetical protein RS04802 [Ralstonia solanacear	2
1631		gi|17549755|ref|NP_523095.1| hemagglutinin-like signal peptide protein [Ralston	2
1632		gi|17549767|ref|NP_523107.1| hypothetical protein RS02104 [Ralstonia solanacear	2
1633		gi|17549792|ref|NP_523132.1| hypothetical protein RS02129 [Ralstonia solanacear	2
1634		gi|17549824|ref|NP_523164.1| hemagglutinin-like protein [Ralstonia solanacearum	2
1635		gi|17549877|ref|NP_523217.1| hypothetical protein RS02217 [Ralstonia solanacear	2
1636		gi|17544737|ref|NP_518139.1| response regulator transcription regulator protein	3
1637		gi|17544738|ref|NP_518140.1| hypothetical protein RSc0019 [Ralstonia solanacear	3
1638		gi|17544739|ref|NP_518141.1| hypothetical protein RSc0020 [Ralstonia solanacear	3
1639		gi|17544770|ref|NP_518172.1| hypothetical protein RSc0051 [Ralstonia solanacear	3
1640		gi|17544773|ref|NP_518175.1| aspartyl/glutamyl-tRNA amidotransferase subunit B	3
1641		gi|17544774|ref|NP_518176.1| signal peptide protein [Ralstonia solanacearum GMI	3
1642		gi|17544780|ref|NP_518182.1| rod shape-determining MRED transmembrane protein [	3
1643		gi|17544792|ref|NP_518194.1| transporter transmembrane protein [Ralstonia solan	3
1644		gi|17544807|ref|NP_518209.1| soluble lytic murein transglycosylase precursor tr	3
1645		gi|17544828|ref|NP_518230.1| thiazole synthase [Ralstonia solanacearum GMI1000]	3
1646		gi|17544839|ref|NP_518241.1| hypothetical protein RSc0120 [Ralstonia solanacear	3
1647		gi|17544850|ref|NP_518252.1| lipoprotein [Ralstonia solanacearum GMI1000]	3
1648		gi|17544856|ref|NP_518258.1| diaminopimelate epimerase [Ralstonia solanacearum	3
1649		gi|17544859|ref|NP_518261.1| exodeoxyribonuclease III protein [Ralstonia solana	3
1650		gi|17544888|ref|NP_518290.1| transmembrane oxidoreductase [Ralstonia solanacear	3
1651		gi|17544891|ref|NP_518293.1| hypothetical protein RSc0172 [Ralstonia solanacear	3
1652		gi|17544897|ref|NP_518299.1| D-fructose-6-phosphate amidotransferase [Ralstonia	3
1653		gi|17544910|ref|NP_518312.1| transmembrane two component system sensor kinase t	3
1654		gi|17544913|ref|NP_518315.1| zinc-dependent alcohol dehydrogenase oxidoreductas	3
1655		gi|17544921|ref|NP_518323.1| phosphoribosylpyrophosphate synthetase [Ralstonia	3
1656		gi|17544922|ref|NP_518324.1| hypothetical protein RSc0203 [Ralstonia solanacear	3
1657		gi|17544930|ref|NP_518332.1| hypothetical protein RSc0211 [Ralstonia solanacear	3
1658		gi|17544947|ref|NP_518349.1| hypothetical protein RSc0228 [Ralstonia solanacear	3
1659		gi|17544950|ref|NP_518352.1| (homoserine/homoserine lactone) efflux transmembra	3
1660		gi|17544960|ref|NP_518362.1| hypothetical protein RSc0241 [Ralstonia solanacear	3
1661		gi|17544978|ref|NP_518380.1| hypothetical protein RSc0259 [Ralstonia solanacear	3
1662		gi|17544984|ref|NP_518386.1| acyl-CoA carboxylase subunit alpha [Ralstonia sola	3
1663		gi|17545028|ref|NP_518430.1| transferase [Ralstonia solanacearum GMI1000]	3
1664		gi|17545076|ref|NP_518478.1| NAD(P)H-dependent glycerol-3-phosphate dehydrogena	3
1665		gi|17545082|ref|NP_518484.1| cytochrome C oxidase polypeptide I [Ralstonia sola	3
1666		gi|17545089|ref|NP_518491.1| hypothetical protein RSc0370 [Ralstonia solanacear	3
1667		gi|17545100|ref|NP_518502.1| nitrate transporter protein [Ralstonia solanacearu	3
1668		gi|17545102|ref|NP_518504.1| hypothetical protein RSc0383 [Ralstonia solanacear	3
1669		gi|17545106|ref|NP_518508.1| zinc protease [Ralstonia solanacearum GMI1000]	3
1670		gi|17545124|ref|NP_518526.1| HPr kinase/phosphorylase [Ralstonia solanacearum G	3
1671		gi|17545125|ref|NP_518527.1| nitrogen regulatory IIA (enzyme IIA-Ntr) (phosphot	3
1672		gi|17545135|ref|NP_518537.1| hypothetical protein RSc0416 [Ralstonia solanacear	3
1673		gi|17545151|ref|NP_518553.1| hypothetical protein RSc0432 [Ralstonia solanacear	3
1674		gi|17545162|ref|NP_518564.1| glycin-rich signal peptide protein [Ralstonia sola	3
1675		gi|17545168|ref|NP_518570.1| threonine dehydratase [Ralstonia solanacearum GMI1	3
1676		gi|17545192|ref|NP_518594.1| acyl-CoA dehydrogenase oxidoreductase [Ralstonia s	3
1677		gi|17545195|ref|NP_518597.1| enoyl-CoA hydratase [Ralstonia solanacearum GMI100	3
1678		gi|17545196|ref|NP_518598.1| hypothetical protein RSc0477 [Ralstonia solanacear	3
1679		gi|17545207|ref|NP_518609.1| transmembrane protein [Ralstonia solanacearum GMI1	3
1680		gi|17545225|ref|NP_518627.1| NIFR3-like protein [Ralstonia solanacearum GMI1000	3
1681		gi|17545233|ref|NP_518635.1| hypothetical protein RSc0514 [Ralstonia solanacear	3
1682		gi|17545244|ref|NP_518646.1| signal peptide protein [Ralstonia solanacearum GMI	3
1683		gi|17545245|ref|NP_518647.1| glycyl-tRNA synthetase subunit alpha [Ralstonia so	3
1684		gi|17545250|ref|NP_518652.1| hypothetical protein RSc0531 [Ralstonia solanacear	3
1685		gi|17545281|ref|NP_518683.1| hypothetical protein RSc0562 [Ralstonia solanacear	3
1686		gi|17545296|ref|NP_518698.1| hypothetical protein RSc0577 [Ralstonia solanacear	3
1687		gi|17545297|ref|NP_518699.1| ISRSO8-transposase orfB protein [Ralstonia solanac	3
1688		gi|17545300|ref|NP_518702.1| phosphoglycolate phosphatase [Ralstonia solanacear	3
1689		gi|17545307|ref|NP_518709.1| hypothetical protein RSc0588 [Ralstonia solanacear	3
1690		gi|17545322|ref|NP_518724.1| hypothetical protein RSc0603 [Ralstonia solanacear	3
1691		gi|17545323|ref|NP_518725.1| hydrolase oxidoreductase [Ralstonia solanacearum G	3
1692		gi|17545326|ref|NP_518728.1| glutathione S-transferase [Ralstonia solanacearum	3
1693		gi|17545336|ref|NP_518738.1| signal peptide protein [Ralstonia solanacearum GMI	3
1694		gi|17545337|ref|NP_518739.1| recombination associated protein [Ralstonia solana	3
1695		gi|17545340|ref|NP_518742.1| hypothetical protein RSc0621 [Ralstonia solanacear	3
1696		gi|17545363|ref|NP_518765.1| transmembrane protein [Ralstonia solanacearum GMI1	3
1697		gi|17545421|ref|NP_518823.1| NADH-dependent flavin oxidoreductase oxidoreductas	3
1698		gi|17545423|ref|NP_518825.1| hypothetical protein RSc0704 [Ralstonia solanacear	3
1699		gi|17545441|ref|NP_518843.1| type 4 fimbrial pilin related transmembrane protei	3
1700		gi|17545492|ref|NP_518894.1| hypothetical protein RSc0773 [Ralstonia solanacear	3
1701		gi|17545498|ref|NP_518900.1| thioredoxin protein [Ralstonia solanacearum GMI100	3
1702		gi|17545505|ref|NP_518907.1| hypothetical protein RSc0786 [Ralstonia solanacear	3
1703		gi|17545512|ref|NP_518914.1| hypothetical protein RSc0793 [Ralstonia solanacear	3
1704		gi|17545518|ref|NP_518920.1| purine nucleoside permease [Ralstonia solanacearum	3
1705		gi|17545536|ref|NP_518938.1| glutathione S-transferase [Ralstonia solanacearum	3
1706		gi|17545540|ref|NP_518942.1| NADPH nitroreductase [Ralstonia solanacearum GMI10	3
1707		gi|17545541|ref|NP_518943.1| hypothetical protein RSc0822 [Ralstonia solanacear	3
1708		gi|17545585|ref|NP_518987.1| hypothetical protein RSc0866 [Ralstonia solanacear	3
1709		gi|17545607|ref|NP_519009.1| activation/secretion protein [Ralstonia solanacear	3
1710		gi|17545615|ref|NP_519017.1| transmembrane protein [Ralstonia solanacearum GMI1	3
1711		gi|17545635|ref|NP_519037.1| ComEA-related signal peptide protein [Ralstonia so	3
1712		gi|17545639|ref|NP_519041.1| ABC transporter ATP-binding protein [Ralstonia sol	3
1713		gi|17545653|ref|NP_519055.1| 16S rRNA-processing protein [Ralstonia solanacearu	3
1714		gi|17545654|ref|NP_519056.1| tRNA (guanine-N(1)-)-methyltransferase [Ralstonia	3
1715		gi|17545655|ref|NP_519057.1| 50S ribosomal protein L19 [Ralstonia solanacearum	3
1716		gi|17545660|ref|NP_519062.1| integral membrane protease transmembrane protein [	3
1717		gi|17545674|ref|NP_519076.1| hypothetical protein RSc0955 [Ralstonia solanacear	3
1718		gi|17545679|ref|NP_519081.1| hypothetical protein RSc0960 [Ralstonia solanacear	3
1719		gi|17545682|ref|NP_519084.1| hypothetical protein RSc0963 [Ralstonia solanacear	3
1720		gi|17545689|ref|NP_519091.1| signal peptide protein [Ralstonia solanacearum GMI	3
1721		gi|17545691|ref|NP_519093.1| hypothetical protein RSc0972 [Ralstonia solanacear	3
1722		gi|17545718|ref|NP_519120.1| periplasmic cytochrome type-c oxidoreductase signa	3
1723		gi|17545739|ref|NP_519141.1| scaffold protein [Ralstonia solanacearum GMI1000]	3
1724		gi|17545742|ref|NP_519144.1| co-chaperone HscB [Ralstonia solanacearum GMI1000]	3
1725		gi|17545776|ref|NP_519178.1| sigma-E factor regulatory (negative regulator) tra	3
1726		gi|17545793|ref|NP_519195.1| signal peptide protein [Ralstonia solanacearum GMI	3
1727		gi|17545816|ref|NP_519218.1| transcription regulator protein [Ralstonia solanac	3
1728		gi|17545825|ref|NP_519227.1| formyltetrahydrofolate deformylase [Ralstonia sola	3
1729		gi|17545844|ref|NP_519246.1| hydrolase [Ralstonia solanacearum GMI1000]	3
1730		gi|17545879|ref|NP_519281.1| inositol monophosphatase [Ralstonia solanacearum G	3
1731		gi|17545908|ref|NP_519310.1| hypothetical protein RSc1189 [Ralstonia solanacear	3
1732		gi|17545910|ref|NP_519312.1| DNA polymerase III subunits gamma and tau [Ralston	3
1733		gi|17545930|ref|NP_519332.1| nucleoside diphosphate kinase [Ralstonia solanacea	3
1734		gi|17545933|ref|NP_519335.1| hypothetical protein RSc1214 [Ralstonia solanacear	3
1735		gi|17545981|ref|NP_519383.1| hypothetical protein RSc1262 [Ralstonia solanacear	3
1736		gi|17546000|ref|NP_519402.1| lipoprotein transmembrane [Ralstonia solanacearum	3
1737		gi|17546063|ref|NP_519465.1| hypothetical protein RSc1344 [Ralstonia solanacear	3
1738		gi|17546071|ref|NP_519473.1| two-component response regulator transcription reg	3
1739		gi|17546094|ref|NP_519496.1| racemase transmembrane protein [Ralstonia solanace	3
1740		gi|17546096|ref|NP_519498.1| hypothetical protein RSc1377 [Ralstonia solanacear	3
1741		gi|17546107|ref|NP_519509.1| N5-glutamine S-adenosyl-L-methionine-dependent met	3
1742		gi|17546115|ref|NP_519517.1| transmembrane protein [Ralstonia solanacearum GMI1	3
1743		gi|17546153|ref|NP_519555.1| ISRSO10-transposase ORFA protein [Ralstonia solana	3
1744		gi|17546164|ref|NP_519566.1| hypothetical protein RSc1445 [Ralstonia solanacear	3
1745		gi|17546186|ref|NP_519588.1| oxidoreductase [Ralstonia solanacearum GMI1000]	3
1746		gi|17546187|ref|NP_519589.1| oxidoreductase [Ralstonia solanacearum GMI1000]	3
1747		gi|17546224|ref|NP_519626.1| alcohol dehydrogenase-like oxidoreductase [Ralston	3
1748		gi|17546229|ref|NP_519631.1| hypothetical protein RSc1510 [Ralstonia solanacear	3
1749		gi|17546260|ref|NP_519662.1| hypothetical protein RSc1541 [Ralstonia solanacear	3
1750		gi|17546268|ref|NP_519670.1| ISRSO8-transposase orfB protein [Ralstonia solanac	3
1751		gi|17546270|ref|NP_519672.1| hypothetical protein RSc1551 [Ralstonia solanacear	3
1752		gi|17546281|ref|NP_519683.1| O-acetylhomoserine aminocarboxypropyltransferase [	3
1753		gi|17546305|ref|NP_519707.1| lipoprotein [Ralstonia solanacearum GMI1000]	3
1754		gi|17546321|ref|NP_519723.1| hypothetical protein RSc1602 [Ralstonia solanacear	3
1755		gi|17546342|ref|NP_519744.1| transcription accessory protein [Ralstonia solanac	3
1756		gi|17546347|ref|NP_519749.1| ribosomal large subunit pseudouridine synthase D p	3
1757		gi|17546360|ref|NP_519762.1| acetylornithine deacetylase [Ralstonia solanacearu	3
1758		gi|17546399|ref|NP_519801.1| phage phi-105 holin-like protein [Ralstonia solana	3
1759		gi|17546404|ref|NP_519806.1| hypothetical protein RSc1685 [Ralstonia solanacear	3
1760		gi|17546459|ref|NP_519861.1| signal peptide protein [Ralstonia solanacearum GMI	3
1761		gi|17546474|ref|NP_519876.1| transposase [Ralstonia solanacearum GMI1000]	3
1762		gi|17546483|ref|NP_519885.1| hypothetical protein RSc1764 [Ralstonia solanacear	3
1763		gi|17546484|ref|NP_519886.1| 6-aminohexanoate-dimer hydrolase lipoprotein [Rals	3
1764		gi|17546488|ref|NP_519890.1| hypothetical protein RSc1769 [Ralstonia solanacear	3
1765		gi|17546505|ref|NP_519907.1| type 4 fimbrial biogenesis protein [Ralstonia sola	3
1766		gi|17546518|ref|NP_519920.1| branched-chain alpha-keto acid dehydrogenase subun	3
1767		gi|17546554|ref|NP_519956.1| hypothetical protein RSc1835 [Ralstonia solanacear	3
1768		gi|17546582|ref|NP_519984.1| hypothetical protein RSc1863 [Ralstonia solanacear	3
1769		gi|17546588|ref|NP_519990.1| hypothetical protein RSc1869 [Ralstonia solanacear	3
1770		gi|17546607|ref|NP_520009.1| hypothetical protein RSc1888 [Ralstonia solanacear	3
1771		gi|17546648|ref|NP_520050.1| tail completion-like protein [Ralstonia solanacear	3
1772		gi|17546656|ref|NP_520058.1| bacteriophage protein [Ralstonia solanacearum GMI1	3
1773		gi|17546662|ref|NP_520064.1| hypothetical protein RSc1943 [Ralstonia solanacear	3
1774		gi|17546686|ref|NP_520088.1| GLCG protein [Ralstonia solanacearum GMI1000]	3
1775		gi|17546721|ref|NP_520123.1| 2-methylcitrate dehydratase [Ralstonia solanacearu	3
1776		gi|17546724|ref|NP_520126.1| hypothetical protein RSc2005 [Ralstonia solanacear	3
1777		gi|17546733|ref|NP_520135.1| enoyl-CoA hydratase [Ralstonia solanacearum GMI100	3
1778		gi|17546749|ref|NP_520151.1| urease accessory protein UreF [Ralstonia solanacea	3
1779		gi|17546758|ref|NP_520160.1| ABC transporter permease [Ralstonia solanacearum G	3
1780		gi|17546794|ref|NP_520196.1| ketol-acid reductoisomerase [Ralstonia solanacearu	3
1781		gi|17546807|ref|NP_520209.1| hypothetical protein RSc2088 [Ralstonia solanacear	3
1782		gi|17546815|ref|NP_520217.1| xanthine dehydrogenase subunit B [Ralstonia solana	3
1783		gi|17546828|ref|NP_520230.1| hypothetical protein RSc2109 [Ralstonia solanacear	3
1784		gi|17546830|ref|NP_520232.1| dihydrodipicolinate synthase [Ralstonia solanacear	3
1785		gi|17546835|ref|NP_520237.1| transthyretin-like protein precursor [Ralstonia so	3
1786		gi|17546855|ref|NP_520257.1| porin signal peptide protein [Ralstonia solanacear	3
1787		gi|17546876|ref|NP_520278.1| protein kinase [Ralstonia solanacearum GMI1000]	3
1788		gi|17546899|ref|NP_520301.1| transmembrane protein [Ralstonia solanacearum GMI1	3
1789		gi|17546901|ref|NP_520303.1| hypothetical protein RSc2182 [Ralstonia solanacear	3
1790		gi|17546926|ref|NP_520328.1| TRP repressor binding protein [Ralstonia solanacea	3
1791		gi|17546970|ref|NP_520372.1| 3-carboxy-cis,cis-muconate cycloisomerase [Ralston	3
1792		gi|17546986|ref|NP_520388.1| ISRSO8-transposase orfB protein [Ralstonia solanac	3
1793		gi|17546988|ref|NP_520390.1| signal peptide protein [Ralstonia solanacearum GMI	3
1794		gi|17547005|ref|NP_520407.1| hypothetical protein RSc2286 [Ralstonia solanacear	3
1795		gi|17547015|ref|NP_520417.1| transmembrane protein [Ralstonia solanacearum GMI1	3
1796		gi|17547022|ref|NP_520424.1| GSPD-like protein [Ralstonia solanacearum GMI1000]	3
1797		gi|17547050|ref|NP_520452.1| ISRSO10-transposase ORFB protein [Ralstonia solana	3
1798		gi|17547087|ref|NP_520489.1| superoxide dismutase Cu-Zn precursor protein [Rals	3
1799		gi|17547105|ref|NP_520507.1| hypothetical protein RSc2386 [Ralstonia solanacear	3
1800		gi|17547118|ref|NP_520520.1| transmembrane ABC transporter protein [Ralstonia s	3
1801		gi|17547140|ref|NP_520542.1| sulfate adenylyltransferase subunit 1 protein [Ral	3
1802		gi|17547145|ref|NP_520547.1| hypothetical protein RSc2426 [Ralstonia solanacear	3
1803		gi|17547162|ref|NP_520564.1| FKBP-type 16 kDa peptidyl-prolyl cis-trans isomera	3
1804		gi|17547179|ref|NP_520581.1| transmembrane protein [Ralstonia solanacearum GMI1	3
1805		gi|17547190|ref|NP_520592.1| hypothetical protein RSc2471 [Ralstonia solanacear	3
1806		gi|17547209|ref|NP_520611.1| isocitrate dehydrogenase [Ralstonia solanacearum G	3
1807		gi|17547214|ref|NP_520616.1| hydrolase [Ralstonia solanacearum GMI1000]	3
1808		gi|17547228|ref|NP_520630.1| hypothetical protein RSc2509 [Ralstonia solanacear	3
1809		gi|17547257|ref|NP_520659.1| lipoprotein transmembrane [Ralstonia solanacearum	3
1810		gi|17547279|ref|NP_520681.1| transcription regulator protein [Ralstonia solanac	3
1811		gi|17547290|ref|NP_520692.1| hypothetical protein RSc2571 [Ralstonia solanacear	3
1812		gi|17547296|ref|NP_520698.1| conjugal transfer TrbF transmembrane protein [Rals	3
1813		gi|17547301|ref|NP_520703.1| conjugal transfer TrbD transmembrane protein [Rals	3
1814		gi|17547320|ref|NP_520722.1| hypothetical protein RSc2601 [Ralstonia solanacear	3
1815		gi|17547325|ref|NP_520727.1| replication initiator and transcription repressor	3
1816		gi|17547328|ref|NP_520730.1| lipoprotein [Ralstonia solanacearum GMI1000]	3
1817		gi|17547329|ref|NP_520731.1| transcription regulator protein [Ralstonia solanac	3
1818		gi|17547341|ref|NP_520743.1| integrase [Ralstonia solanacearum GMI1000]	3
1819		gi|17547382|ref|NP_520784.1| hypothetical protein RSc2663 [Ralstonia solanacear	3
1820		gi|17547401|ref|NP_520803.1| twitching motility protein [Ralstonia solanacearum	3
1821		gi|17547408|ref|NP_520810.1| hypothetical protein RSc2689 [Ralstonia solanacear	3
1822		gi|17547409|ref|NP_520811.1| hydrogen peroxide-inducible genes activator transc	3
1823		gi|17547413|ref|NP_520815.1| pili assembly chaperone transmembrane protein [Ral	3
1824		gi|17547420|ref|NP_520822.1| hypothetical protein RSc2701 [Ralstonia solanacear	3
1825		gi|17547447|ref|NP_520849.1| hypothetical protein RSc2728 [Ralstonia solanacear	3
1826		gi|17547451|ref|NP_520853.1| transmembrane NAD(P) transhydrogenase alpha subuni	3
1827		gi|17547498|ref|NP_520900.1| hypothetical protein RSc2779 [Ralstonia solanacear	3
1828		gi|17547505|ref|NP_520907.1| acetyl-CoA carboxylase biotin carboxyl carrier pro	3
1829		gi|17547522|ref|NP_520924.1| hypothetical protein RSc2803 [Ralstonia solanacear	3
1830		gi|17547534|ref|NP_520936.1| signal peptide protein [Ralstonia solanacearum GMI	3
1831		gi|17547537|ref|NP_520939.1| lipoprotein [Ralstonia solanacearum GMI1000]	3
1832		gi|17547557|ref|NP_520959.1| type 2 peroxiredoxin protein [Ralstonia solanacear	3
1833		gi|17547564|ref|NP_520966.1| cell division FtsW transmembrane protein [Ralstoni	3
1834		gi|17547568|ref|NP_520970.1| UDP-N-acetylmuramoylalanyl-D-glutamate--2,6-diamin	3
1835		gi|17547571|ref|NP_520973.1| S-adenosyl-methyltransferase MraW [Ralstonia solan	3
1836		gi|17547576|ref|NP_520978.1| acyl-CoA synthetase [Ralstonia solanacearum GMI100	3
1837		gi|17547625|ref|NP_521027.1| hypothetical protein RSc2906 [Ralstonia solanacear	3
1838		gi|17547629|ref|NP_521031.1| signal peptide protein [Ralstonia solanacearum GMI	3
1839		gi|17547657|ref|NP_521059.1| transmembrane ABC transporter protein [Ralstonia s	3
1840		gi|17547661|ref|NP_521063.1| twin argininte translocase A [Ralstonia solanacear	3
1841		gi|17547674|ref|NP_521076.1| hypothetical protein RSc2955 [Ralstonia solanacear	3
1842		gi|17547677|ref|NP_521079.1| signal peptide protein [Ralstonia solanacearum GMI	3
1843		gi|17547701|ref|NP_521103.1| hypothetical protein RSc2982 [Ralstonia solanacear	3
1844		gi|17547703|ref|NP_521105.1| hypothetical protein RSc2984 [Ralstonia solanacear	3
1845		gi|17547739|ref|NP_521141.1| 30S ribosomal protein S10 [Ralstonia solanacearum	3
1846		gi|17547759|ref|NP_521161.1| preprotein translocase subunit SecE [Ralstonia sol	3
1847		gi|17547768|ref|NP_521170.1| transmembrane ABC transporter protein [Ralstonia s	3
1848		gi|17547781|ref|NP_521183.1| transcription regulator protein [Ralstonia solanac	3
1849		gi|17547782|ref|NP_521184.1| transmembrane sensor histidine kinase transcriptio	3
1850		gi|17547795|ref|NP_521197.1| hypothetical protein RSc3076 [Ralstonia solanacear	3
1851		gi|17547818|ref|NP_521220.1| signal peptide protein [Ralstonia solanacearum GMI	3
1852		gi|17547827|ref|NP_521229.1| general secretion pathway protein I [Ralstonia sol	3
1853		gi|17547829|ref|NP_521231.1| general secretion pathway protein K [Ralstonia sol	3
1854		gi|17547830|ref|NP_521232.1| general secretion pathway protein L [Ralstonia sol	3
1855		gi|17547860|ref|NP_521262.1| lipoprotein transmembrane [Ralstonia solanacearum	3
1856		gi|17547866|ref|NP_521268.1| hypothetical protein RSc3147 [Ralstonia solanacear	3
1857		gi|17547872|ref|NP_521274.1| hypothetical protein RSc3153 [Ralstonia solanacear	3
1858		gi|17547874|ref|NP_521276.1| antibiotic hydrolase signal peptide protein [Ralst	3
1859		gi|17547886|ref|NP_521288.1| hypothetical protein RSc3167 [Ralstonia solanacear	3
1860		gi|17547888|ref|NP_521290.1| transport, fragment transmembrane protein [Ralston	3
1861		gi|17547890|ref|NP_521292.1| site-specific integrase/resolvase [Ralstonia solan	3
1862		gi|17547911|ref|NP_521313.1| lysozyme (endolysin) protein [Ralstonia solanacear	3
1863		gi|17547977|ref|NP_521379.1| cytochrome C transmembrane protein [Ralstonia sola	3
1864		gi|17547983|ref|NP_521385.1| hypothetical protein RSc3266 [Ralstonia solanacear	3
1865		gi|17547992|ref|NP_521394.1| C4-dicarboxylate transporter DctA [Ralstonia solan	3
1866		gi|17548002|ref|NP_521404.1| Leu/Ile/Val-binding signal peptide protein [Ralsto	3
1867		gi|17548003|ref|NP_521405.1| autoinducer synthesis protein SOLI [Ralstonia sola	3
1868		gi|17548023|ref|NP_521425.1| hypothetical protein RSc3306 [Ralstonia solanacear	3
1869		gi|17548028|ref|NP_521430.1| hypothetical protein RSc3311 [Ralstonia solanacear	3
1870		gi|17548035|ref|NP_521437.1| F0F1 ATP synthase subunit gamma [Ralstonia solanac	3
1871		gi|17548039|ref|NP_521441.1| F0F1 ATP synthase subunit C [Ralstonia solanacearu	3
1872		gi|17548049|ref|NP_521451.1| transcription regulator protein [Ralstonia solanac	3
1873		gi|17548056|ref|NP_521458.1| hypothetical protein RSc3339 [Ralstonia solanacear	3
1874		gi|17548057|ref|NP_521459.1| transmembrane ABC transporter protein [Ralstonia s	3
1875		gi|17548079|ref|NP_521481.1| hypothetical protein RSc3362 [Ralstonia solanacear	3
1876		gi|17548082|ref|NP_521484.1| septum site-determining protein MIND [Ralstonia so	3
1877		gi|17548085|ref|NP_521487.1| hypothetical protein RSc3368 [Ralstonia solanacear	3
1878		gi|17548090|ref|NP_521492.1| transcription regulator protein [Ralstonia solanac	3
1879		gi|17548108|ref|NP_521510.1| signal peptide protein [Ralstonia solanacearum GMI	3
1880		gi|17548114|ref|NP_521516.1| hypothetical protein RSc3397 [Ralstonia solanacear	3
1881		gi|17548127|ref|NP_521529.1| amino acid-binding periplasmic (PBP) ABC transport	3
1882		gi|17548254|ref|NP_521594.1| oxidoreductase protein [Ralstonia solanacearum GMI	3
1883		gi|17548265|ref|NP_521605.1| transcription regulator protein [Ralstonia solanac	3
1884		gi|17548295|ref|NP_521635.1| putative signal peptide protein [Ralstonia solanac	3
1885		gi|17548302|ref|NP_521642.1| hypothetical protein RS05540 [Ralstonia solanacear	3
1886		gi|17548317|ref|NP_521657.1| putative RHS-related protein [Ralstonia solanacear	3
1887		gi|17548324|ref|NP_521664.1| putative VGR-related protein [Ralstonia solanacear	3
1888		gi|17548331|ref|NP_521671.1| hypothetical protein RS03012 [Ralstonia solanacear	3
1889		gi|17548370|ref|NP_521710.1| general secretion pathway GSPF-like transmembrane	3
1890		gi|17548377|ref|NP_521717.1| ISRSO17-transposase protein [Ralstonia solanacearu	3
1891		gi|17548395|ref|NP_521735.1| methyltransferase protein [Ralstonia solanacearum	3
1892		gi|17548397|ref|NP_521737.1| hypothetical protein RS04688 [Ralstonia solanacear	3
1893		gi|17548399|ref|NP_521739.1| hypothetical protein RS04690 [Ralstonia solanacear	3
1894		gi|17548429|ref|NP_521769.1| hypothetical protein RS05220 [Ralstonia solanacear	3
1895		gi|17548440|ref|NP_521780.1| hypothetical protein RS05205 [Ralstonia solanacear	3
1896		gi|17548444|ref|NP_521784.1| vanillate O-demethylase [Ralstonia solanacearum GM	3
1897		gi|17548464|ref|NP_521804.1| hemin transport protein [Ralstonia solanacearum GM	3
1898		gi|17548467|ref|NP_521807.1| alkyl hydroperoxide reductase subunit F [Ralstonia	3
1899		gi|17548470|ref|NP_521810.1| hypothetical protein RS03717 [Ralstonia solanacear	3
1900		gi|17548476|ref|NP_521816.1| methyl-accepting chemotaxis transducer transmembra	3
1901		gi|17548477|ref|NP_521817.1| hypothetical protein RS03710 [Ralstonia solanacear	3
1902		gi|17548484|ref|NP_521824.1| hypothetical protein RS03702 [Ralstonia solanacear	3
1903		gi|17548531|ref|NP_521871.1| macrolide-efflux transmembrane protein [Ralstonia	3
1904		gi|17548540|ref|NP_521880.1| metal-transporting P-type ATPase transmembrane pro	3
1905		gi|17548542|ref|NP_521882.1| hypothetical protein RS05446 [Ralstonia solanacear	3
1906		gi|17548571|ref|NP_521911.1| flagellar protein flgJ [Ralstonia solanacearum GMI	3
1907		gi|17548575|ref|NP_521915.1| putative oxidoreductase protein [Ralstonia solanac	3
1908		gi|17548577|ref|NP_521917.1| putative signal peptide protein [Ralstonia solanac	3
1909		gi|17548581|ref|NP_521921.1| hypothetical protein RS00772 [Ralstonia solanacear	3
1910		gi|17548584|ref|NP_521924.1| putative signal peptide protein [Ralstonia solanac	3
1911		gi|17548590|ref|NP_521930.1| acyl carrier protein [Ralstonia solanacearum GMI10	3
1912		gi|17548613|ref|NP_521953.1| flagellar assembly protein H [Ralstonia solanacear	3
1913		gi|17548635|ref|NP_521975.1| ferric siderophore receptor protein [Ralstonia sol	3
1914		gi|17548637|ref|NP_521977.1| ferric siderophore receptor outer membrane signal	3
1915		gi|17548639|ref|NP_521979.1| ornithine cyclodeaminase protein [Ralstonia solana	3
1916		gi|17548642|ref|NP_521982.1| siderophore biosynthesis protein [Ralstonia solana	3
1917		gi|17548648|ref|NP_521988.1| hypothetical protein RS00884 [Ralstonia solanacear	3
1918		gi|17548682|ref|NP_522022.1| ISRSO10-transposase ORFA protein [Ralstonia solana	3
1919		gi|17548683|ref|NP_522023.1| putative signal peptide protein [Ralstonia solanac	3
1920		gi|17548693|ref|NP_522033.1| putative prolin-rich signal peptide protein [Ralst	3
1921		gi|17548700|ref|NP_522040.1| ABC transporter ATP-binding protein [Ralstonia sol	3
1922		gi|17548701|ref|NP_522041.1| amino acid ABC transporter transmembrane protein [	3
1923		gi|17548726|ref|NP_522066.1| 2-hydroxyacid dehydrogenase [Ralstonia solanacearu	3
1924		gi|17548734|ref|NP_522074.1| putative transmembrane protein [Ralstonia solanace	3
1925		gi|17548735|ref|NP_522075.1| hypothetical protein RS00392 [Ralstonia solanacear	3
1926		gi|17548743|ref|NP_522083.1| hypothetical protein RS00401 [Ralstonia solanacear	3
1927		gi|17548746|ref|NP_522086.1| hypothetical protein RS00404 [Ralstonia solanacear	3
1928		gi|17548747|ref|NP_522087.1| hypothetical protein RS00405 [Ralstonia solanacear	3
1929		gi|17548769|ref|NP_522109.1| ISRSO8-transposase orfB protein [Ralstonia solanac	3
1930		gi|17548781|ref|NP_522121.1| hypothetical protein RS03918 [Ralstonia solanacear	3
1931		gi|17548783|ref|NP_522123.1| hypothetical protein RS03916 [Ralstonia solanacear	3
1932		gi|17548787|ref|NP_522127.1| ISRSO10-transposase ORFA protein [Ralstonia solana	3
1933		gi|17548801|ref|NP_522141.1| product of A truncated bacteriophage gene protein	3
1934		gi|17548807|ref|NP_522147.1| hypothetical protein RS03894 [Ralstonia solanacear	3
1935		gi|17548813|ref|NP_522153.1| hypothetical protein RS03888 [Ralstonia solanacear	3
1936		gi|17548850|ref|NP_522190.1| putative VGR-related protein [Ralstonia solanacear	3
1937		gi|17548882|ref|NP_522222.1| hypothetical protein RS01788 [Ralstonia solanacear	3
1938		gi|17548894|ref|NP_522234.1| lipoprotein [Ralstonia solanacearum GMI1000]	3
1939		gi|17548897|ref|NP_522237.1| 5-methyltetrahydropteroyltriglutamate--homocystein	3
1940		gi|17548898|ref|NP_522238.1| putative transcriptional activator METR transcript	3
1941		gi|17548900|ref|NP_522240.1| putative diaminopimelate decarboxylase protein [Ra	3
1942		gi|17548902|ref|NP_522242.1| anthranilate phosphoribosyltransferase [Ralstonia	3
1943		gi|17548907|ref|NP_522247.1| transcription regulator protein [Ralstonia solanac	3
1944		gi|17548919|ref|NP_522259.1| putative aminotransferase protein [Ralstonia solan	3
1945		gi|17548929|ref|NP_522269.1| signal peptide protein [Ralstonia solanacearum GMI	3
1946		gi|17548946|ref|NP_522286.1| hypothetical protein RS01723 [Ralstonia solanacear	3
1947		gi|17548954|ref|NP_522294.1| hypothetical protein RS05792 [Ralstonia solanacear	3
1948		gi|17548962|ref|NP_522302.1| putative transmembrane protein [Ralstonia solanace	3
1949		gi|17548985|ref|NP_522325.1| hypothetical protein RS01944 [Ralstonia solanacear	3
1950		gi|17548996|ref|NP_522336.1| hypothetical protein RS01933 [Ralstonia solanacear	3
1951		gi|17548997|ref|NP_522337.1| hypothetical protein RS01932 [Ralstonia solanacear	3
1952		gi|17549010|ref|NP_522350.1| hypothetical protein RS01918 [Ralstonia solanacear	3
1953		gi|17549017|ref|NP_522357.1| putative transcription regulator protein [Ralstoni	3
1954		gi|17549049|ref|NP_522389.1| putative glucarate transporter (D-glucarate permea	3
1955		gi|17549050|ref|NP_522390.1| glucarate dehydratase protein [Ralstonia solanacea	3
1956		gi|17549054|ref|NP_522394.1| polygalacturonase transmembrane protein [Ralstonia	3
1957	RSp0845	gi|17549066|ref|NP_522406.1| hypothetical protein RS05351 [Ralstonia solanacear	3
1958		gi|17549070|ref|NP_522410.1| RNA polymerase sigma factor [Ralstonia solanacearu	3
1959	RSp0865	gi|17549086|ref|NP_522426.1| HRPK protein [Ralstonia solanacearum GMI1000]	3
1960		gi|17549107|ref|NP_522447.1| glutamine synthetase protein [Ralstonia solanacear	3
1961		gi|17549112|ref|NP_522452.1| putative hydratase protein [Ralstonia solanacearum	3
1962		gi|17549117|ref|NP_522457.1| 4-hydroxybenzoate transporter [Ralstonia solanacea	3
1963		gi|17549124|ref|NP_522464.1| hypothetical protein RS01674 [Ralstonia solanacear	3
1964		gi|17549129|ref|NP_522469.1| hypothetical protein RS01680 [Ralstonia solanacear	3
1965		gi|17549131|ref|NP_522471.1| transcription regulator protein [Ralstonia solanac	3
1966		gi|17549162|ref|NP_522502.1| putative biotin carboxyl carrier protein of acetyl	3
1967		gi|17549187|ref|NP_522527.1| transcription regulator protein [Ralstonia solanac	3
1968		gi|17549194|ref|NP_522534.1| nitrite/nitrate ABC transporter transmembrane prot	3
1969		gi|17549215|ref|NP_522555.1| excinuclease ABC subunit A [Ralstonia solanacearum	3
1970		gi|17549232|ref|NP_522572.1| hypothetical protein RS02345 [Ralstonia solanacear	3
1971		gi|17549234|ref|NP_522574.1| putative transferase protein [Ralstonia solanacear	3
1972		gi|17549255|ref|NP_522595.1| signal peptide protein [Ralstonia solanacearum GMI	3
1973		gi|17549273|ref|NP_522613.1| potassium uptake transmembrane protein [Ralstonia	3
1974		gi|17549275|ref|NP_522615.1| hypothetical protein RS02391 [Ralstonia solanacear	3
1975		gi|17549283|ref|NP_522623.1| ferrisiderophore receptor protein [Ralstonia solan	3
1976		gi|17549288|ref|NP_522628.1| hypothetical protein RS06033 [Ralstonia solanacear	3
1977		gi|17549303|ref|NP_522643.1| lipoprotein transmembrane [Ralstonia solanacearum	3
1978		gi|17549332|ref|NP_522672.1| lipase protein [Ralstonia solanacearum GMI1000]	3
1979		gi|17549363|ref|NP_522703.1| putative transcription regulator protein [Ralstoni	3
1980		gi|17549366|ref|NP_522706.1| ABC transporter ATP-binding protein [Ralstonia sol	3
1981		gi|17549395|ref|NP_522735.1| putative acid phosphatase protein [Ralstonia solan	3
1982		gi|17549407|ref|NP_522747.1| hypothetical protein RS03130 [Ralstonia solanacear	3
1983		gi|17549418|ref|NP_522758.1| putative resistance transmembrane protein [Ralston	3
1984		gi|17549422|ref|NP_522762.1| signal peptide protein [Ralstonia solanacearum GMI	3
1985		gi|17549432|ref|NP_522772.1| cardiolipin synthetase [Ralstonia solanacearum GMI	3
1986		gi|17549452|ref|NP_522792.1| putative transferase protein [Ralstonia solanacear	3
1987		gi|17549459|ref|NP_522799.1| signal peptide protein [Ralstonia solanacearum GMI	3
1988		gi|17549468|ref|NP_522808.1| transcription regulator protein [Ralstonia solanac	3
1989		gi|17549477|ref|NP_522817.1| putative [Acyl-carrier-protein] phosphodiesterase	3
1990		gi|17549534|ref|NP_522874.1| hypothetical protein RS05662 [Ralstonia solanacear	3
1991		gi|17549544|ref|NP_522884.1| hypothetical protein RS05677 [Ralstonia solanacear	3
1992		gi|17549565|ref|NP_522905.1| putative transmembrane protein [Ralstonia solanace	3
1993		gi|17549575|ref|NP_522915.1| hypothetical protein RS04820 [Ralstonia solanacear	3
1994		gi|17549600|ref|NP_522940.1| PHNA protein alkylphosphonate uptake [Ralstonia so	3
1995		gi|17549619|ref|NP_522959.1| hypothetical protein RS02058 [Ralstonia solanacear	3
1996		gi|17549636|ref|NP_522976.1| transmembrane efflux transmembrane protein [Ralsto	3
1997		gi|17549641|ref|NP_522981.1| putative peptide synthetase protein [Ralstonia sol	3
1998		gi|17549646|ref|NP_522986.1| hypothetical protein RS03115 [Ralstonia solanacear	3
1999		gi|17549656|ref|NP_522996.1| hypothetical protein RS03105 [Ralstonia solanacear	3
[truncated: 3,062 more rows]
